# Supplementary material for: A high throughput-mating assay between S. cerevisiae natural strains reveals a genetic basis for sexual selection and fitness inheritance
Source: Research Square preprint supplement (doi:10.21203/rs.3.rs-3127016/v1), 2023-09-19
Supplement: Supplementary file 1 [file 0517808164ef05c619151718.xlsx]

## Sheet: Sup Table 1
columns description: Mata and Matalp parents (the columns containing 3 letters corresponds to the names from Peter et al, Nature, 2018); we have two repeats shown in the paper (col G); -10 tags in the fitness columns indicate strains that were *ABSENT* from the corresponding competition experiments, -1 tags represents strain that were *EXTINCT* during the competition. Genetic distance is taken fr…
A_parent	alp_parent	A_parent_3letters	alp_parent_3letters	offspring	media	repeat	offspring_fitness	offspring_frequency	_log_offspring_frequency	null_model	Genetic_Distance	fitness_A	fitness_alp	mate_groups
ALG1	AKB1	ALG	AKB	ALG1AKB1	Glycerol	2	-10	1.94e-08	-7.71275	-11.7545	1.3399	-1	-1	absent
ALG1	AKB1	ALG	AKB	ALG1AKB1	Glycerol	1	-10	7.72e-09	-8.11232	-12.0455	1.3399	-1	-1	absent
ALG1	AKB1	ALG	AKB	ALG1AKB1	Glucose	1	-10	6.11e-09	-8.21366	-12.3857	1.3399	-0.124109	-0.0154866	absent
ALG1	AKB1	ALG	AKB	ALG1AKB1	Glucose	2	-10	1.32e-08	-7.87867	-12.3116	1.3399	-0.124109	-0.0154866	absent
ALG1	AKB1	ALG	AKB	ALG1AKB1	UY	1	-10	3.06e-08	-7.51367	-11.401	1.3399	-10	-10	absent
ALG1	AKB1	ALG	AKB	ALG1AKB1	UY	2	-10	1.4e-08	-7.85305	-11.9757	1.3399	-10	-10	absent
ALG1	AKP1	ALG	AKP	ALG1AKP1	Glycerol	2	-10	1.94e-08	-7.71275	-10.7972	0.775392	-1	-0.109008	absent
ALG1	AKP1	ALG	AKP	ALG1AKP1	Glycerol	1	-10	7.72e-09	-8.11232	-11.4709	0.775392	-1	-0.109008	absent
ALG1	AKP1	ALG	AKP	ALG1AKP1	Glucose	1	0.0113388	6.11e-09	-8.21366	-11.2432	0.775392	-0.124109	-0.0557565	absent
ALG1	AKP1	ALG	AKP	ALG1AKP1	Glucose	2	0.0113388	1.32e-08	-7.87867	-11.1966	0.775392	-0.124109	-0.0557565	absent
ALG1	AKP1	ALG	AKP	ALG1AKP1	UY	1	-10	3.06e-08	-7.51367	-10.6674	0.775392	-10	-10	absent
ALG1	AKP1	ALG	AKP	ALG1AKP1	UY	2	-10	1.4e-08	-7.85305	-10.9391	0.775392	-10	-10	absent
ALG1	ALG1	ALG	ALG	ALG1ALG1	Glycerol	2	-10	1.94e-08	-7.71275	-15.5053	0	-1	-0.0464457	absent
ALG1	ALG1	ALG	ALG	ALG1ALG1	Glycerol	1	-10	7.72e-09	-8.11232	-16.3045	0	-1	-0.0464457	absent
ALG1	ALG1	ALG	ALG	ALG1ALG1	Glucose	1	-10	6.11e-09	-8.21366	-16.5071	0	-0.124109	-0.141619	absent
ALG1	ALG1	ALG	ALG	ALG1ALG1	Glucose	2	-10	1.32e-08	-7.87867	-15.8371	0	-0.124109	-0.141619	absent
ALG1	ALG1	ALG	ALG	ALG1ALG1	UY	1	-10	3.06e-08	-7.51367	-15.1072	0	-10	-10	absent
ALG1	ALG1	ALG	ALG	ALG1ALG1	UY	2	-10	1.4e-08	-7.85305	-15.7859	0	-10	-10	absent
ALG1	ANG1	ALG	ANG	ALG1ANG1	Glycerol	2	-10	1.94e-08	-7.71275	-15.8869	1.00485	-1	-1	absent
ALG1	ANG1	ALG	ANG	ALG1ANG1	Glycerol	1	-10	7.72e-09	-8.11232	-16.6861	1.00485	-1	-1	absent
ALG1	ANG1	ALG	ANG	ALG1ANG1	Glucose	1	-10	6.11e-09	-8.21366	-16.8887	1.00485	-0.124109	0.0663533	absent
ALG1	ANG1	ALG	ANG	ALG1ANG1	Glucose	2	-10	1.32e-08	-7.87867	-16.2188	1.00485	-0.124109	0.0663533	absent
ALG1	ANG1	ALG	ANG	ALG1ANG1	UY	1	-10	3.06e-08	-7.51367	-15.4888	1.00485	-10	-10	absent
ALG1	ANG1	ALG	ANG	ALG1ANG1	UY	2	-10	1.4e-08	-7.85305	-16.1675	1.00485	-10	-10	absent
ALG1	AIM1	ALG	AIM	ALG1AIM1	Glycerol	2	-10	1.94e-08	-7.71275	-15.6726	0.832878	-1	-10	absent
ALG1	AIM1	ALG	AIM	ALG1AIM1	Glycerol	1	-10	7.72e-09	-8.11232	-16.4717	0.832878	-1	-10	absent
ALG1	AIM1	ALG	AIM	ALG1AIM1	Glucose	1	-10	6.11e-09	-8.21366	-16.6744	0.832878	-0.124109	-10	absent
ALG1	AIM1	ALG	AIM	ALG1AIM1	Glucose	2	-10	1.32e-08	-7.87867	-16.0044	0.832878	-0.124109	-10	absent
ALG1	AIM1	ALG	AIM	ALG1AIM1	UY	1	-10	3.06e-08	-7.51367	-15.2744	0.832878	-10	-10	absent
ALG1	AIM1	ALG	AIM	ALG1AIM1	UY	2	-10	1.4e-08	-7.85305	-15.9532	0.832878	-10	-10	absent
ALG1	AKV1	ALG	AKV	ALG1AKV1	Glycerol	2	-0.0020795	1.94e-08	-7.71275	-10.5639	0.775317	-1	-0.0735332	absent
ALG1	AKV1	ALG	AKV	ALG1AKV1	Glycerol	1	-0.0020795	7.72e-09	-8.11232	-11.3522	0.775317	-1	-0.0735332	absent
ALG1	AKV1	ALG	AKV	ALG1AKV1	Glucose	1	-10	6.11e-09	-8.21366	-11.2107	0.775317	-0.124109	-0.033945	absent
ALG1	AKV1	ALG	AKV	ALG1AKV1	Glucose	2	-10	1.32e-08	-7.87867	-10.8175	0.775317	-0.124109	-0.033945	absent
ALG1	AKV1	ALG	AKV	ALG1AKV1	UY	1	-10	3.06e-08	-7.51367	-10.5363	0.775317	-10	-10	absent
ALG1	AKV1	ALG	AKV	ALG1AKV1	UY	2	-10	1.4e-08	-7.85305	-11.1255	0.775317	-10	-10	absent
ALG1	BBI1	ALG	BBI	ALG1BBI1	Glycerol	2	-10	1.94e-08	-7.71275	-14.8754	0.774873	-1	-0.0628554	absent
ALG1	BBI1	ALG	BBI	ALG1BBI1	Glycerol	1	-10	7.72e-09	-8.11232	-15.6745	0.774873	-1	-0.0628554	absent
ALG1	BBI1	ALG	BBI	ALG1BBI1	Glucose	1	-10	6.11e-09	-8.21366	-14.1059	0.774873	-0.124109	0.0118567	absent
ALG1	BBI1	ALG	BBI	ALG1BBI1	Glucose	2	-10	1.32e-08	-7.87867	-15.2072	0.774873	-0.124109	0.0118567	absent
ALG1	BBI1	ALG	BBI	ALG1BBI1	UY	1	-10	3.06e-08	-7.51367	-14.4772	0.774873	-10	-10	absent
ALG1	BBI1	ALG	BBI	ALG1BBI1	UY	2	-10	1.4e-08	-7.85305	-15.156	0.774873	-10	-10	absent
ALG1	BAK1	ALG	BAK	ALG1BAK1	Glycerol	2	0.114964	1.94e-08	-7.71275	-15.4243	1.35187	-1	-0.00177197	absent
ALG1	BAK1	ALG	BAK	ALG1BAK1	Glycerol	1	0.114964	7.72e-09	-8.11232	-12.8262	1.35187	-1	-0.00177197	absent
ALG1	BAK1	ALG	BAK	ALG1BAK1	Glucose	1	-10	6.11e-09	-8.21366	-12.3705	1.35187	-0.124109	0.0639478	absent
ALG1	BAK1	ALG	BAK	ALG1BAK1	Glucose	2	-10	1.32e-08	-7.87867	-12.0927	1.35187	-0.124109	0.0639478	absent
ALG1	BAK1	ALG	BAK	ALG1BAK1	UY	1	-10	3.06e-08	-7.51367	-11.4366	1.35187	-10	-10	absent
ALG1	BAK1	ALG	BAK	ALG1BAK1	UY	2	-10	1.4e-08	-7.85305	-11.6706	1.35187	-10	-10	absent
ALG1	BEH1	ALG	BEH	ALG1BEH1	Glycerol	2	-10	1.94e-08	-7.71275	-15.1074	1.19742	-1	-1	absent
ALG1	BEH1	ALG	BEH	ALG1BEH1	Glycerol	1	-10	7.72e-09	-8.11232	-15.9065	1.19742	-1	-1	absent
ALG1	BEH1	ALG	BEH	ALG1BEH1	Glucose	1	-10	6.11e-09	-8.21366	-16.1092	1.19742	-0.124109	-0.0314472	absent
ALG1	BEH1	ALG	BEH	ALG1BEH1	Glucose	2	-10	1.32e-08	-7.87867	-15.4392	1.19742	-0.124109	-0.0314472	absent
ALG1	BEH1	ALG	BEH	ALG1BEH1	UY	1	-10	3.06e-08	-7.51367	-14.7092	1.19742	-10	-10	absent
ALG1	BEH1	ALG	BEH	ALG1BEH1	UY	2	-10	1.4e-08	-7.85305	-15.388	1.19742	-10	-10	absent
ALG1	BLA1	ALG	BLA	ALG1BLA1	Glycerol	2	-10	1.94e-08	-7.71275	-12.0804	0.772969	-1	-10	absent
ALG1	BLA1	ALG	BLA	ALG1BLA1	Glycerol	1	-10	7.72e-09	-8.11232	-16.0239	0.772969	-1	-10	absent
ALG1	BLA1	ALG	BLA	ALG1BLA1	Glucose	1	-10	6.11e-09	-8.21366	-12.0048	0.772969	-0.124109	-10	absent
ALG1	BLA1	ALG	BLA	ALG1BLA1	Glucose	2	-10	1.32e-08	-7.87867	-15.5566	0.772969	-0.124109	-10	absent
ALG1	BLA1	ALG	BLA	ALG1BLA1	UY	1	-10	3.06e-08	-7.51367	-13.1209	0.772969	-10	-10	absent
ALG1	BLA1	ALG	BLA	ALG1BLA1	UY	2	-10	1.4e-08	-7.85305	-11.8729	0.772969	-10	-10	absent
ALG1	BHM1	ALG	BHM	ALG1BHM1	Glycerol	2	-10	1.94e-08	-7.71275	-15.4892	0.806216	-1	-1	absent
ALG1	BHM1	ALG	BHM	ALG1BHM1	Glycerol	1	-10	7.72e-09	-8.11232	-16.2883	0.806216	-1	-1	absent
ALG1	BHM1	ALG	BHM	ALG1BHM1	Glucose	1	-10	6.11e-09	-8.21366	-16.491	0.806216	-0.124109	-10	absent
ALG1	BHM1	ALG	BHM	ALG1BHM1	Glucose	2	-10	1.32e-08	-7.87867	-15.821	0.806216	-0.124109	-10	absent
ALG1	BHM1	ALG	BHM	ALG1BHM1	UY	1	-10	3.06e-08	-7.51367	-15.091	0.806216	-10	-10	absent
ALG1	BHM1	ALG	BHM	ALG1BHM1	UY	2	-10	1.4e-08	-7.85305	-15.7698	0.806216	-10	-10	absent
ALG1	BHN1	ALG	BHN	ALG1BHN1	Glycerol	2	-10	1.94e-08	-7.71275	-11.4547	0.788215	-1	-1	absent
ALG1	BHN1	ALG	BHN	ALG1BHN1	Glycerol	1	-10	7.72e-09	-8.11232	-11.7928	0.788215	-1	-1	absent
ALG1	BHN1	ALG	BHN	ALG1BHN1	Glucose	1	-10	6.11e-09	-8.21366	-11.6159	0.788215	-0.124109	-1	absent
ALG1	BHN1	ALG	BHN	ALG1BHN1	Glucose	2	-10	1.32e-08	-7.87867	-11.1359	0.788215	-0.124109	-1	absent
ALG1	BHN1	ALG	BHN	ALG1BHN1	UY	1	-10	3.06e-08	-7.51367	-10.9445	0.788215	-10	-10	absent
ALG1	BHN1	ALG	BHN	ALG1BHN1	UY	2	-10	1.4e-08	-7.85305	-11.8477	0.788215	-10	-10	absent
ALG1	BHB1	ALG	BHB	ALG1BHB1	Glycerol	2	-10	1.94e-08	-7.71275	-11.2894	0.824148	-1	-10	absent
ALG1	BHB1	ALG	BHB	ALG1BHB1	Glycerol	1	-10	7.72e-09	-8.11232	-11.7709	0.824148	-1	-10	absent
ALG1	BHB1	ALG	BHB	ALG1BHB1	Glucose	1	-0.120298	6.11e-09	-8.21366	-10.9312	0.824148	-0.124109	-10	absent
ALG1	BHB1	ALG	BHB	ALG1BHB1	Glucose	2	-0.120298	1.32e-08	-7.87867	-10.6995	0.824148	-0.124109	-10	absent
ALG1	BHB1	ALG	BHB	ALG1BHB1	UY	1	-10	3.06e-08	-7.51367	-10.3299	0.824148	-10	-10	absent
ALG1	BHB1	ALG	BHB	ALG1BHB1	UY	2	-10	1.4e-08	-7.85305	-12.1725	0.824148	-10	-10	absent
ALG1	BLE1	ALG	BLE	ALG1BLE1	Glycerol	2	-10	1.94e-08	-7.71275	-10.5989	0.779835	-1	-0.044381	absent
ALG1	BLE1	ALG	BLE	ALG1BLE1	Glycerol	1	-10	7.72e-09	-8.11232	-10.9321	0.779835	-1	-0.044381	absent
ALG1	BLE1	ALG	BLE	ALG1BLE1	Glucose	1	-10	6.11e-09	-8.21366	-11.4731	0.779835	-0.124109	-0.0748489	absent
ALG1	BLE1	ALG	BLE	ALG1BLE1	Glucose	2	-10	1.32e-08	-7.87867	-11.1462	0.779835	-0.124109	-0.0748489	absent
ALG1	BLE1	ALG	BLE	ALG1BLE1	UY	1	-10	3.06e-08	-7.51367	-10.6756	0.779835	-10	-10	absent
ALG1	BLE1	ALG	BLE	ALG1BLE1	UY	2	-10	1.4e-08	-7.85305	-10.843	0.779835	-10	-10	absent
ALG1	BHF1	ALG	BHF	ALG1BHF1	Glycerol	2	-10	1.94e-08	-7.71275	-12.1309	0.768827	-1	0.0945635	absent
ALG1	BHF1	ALG	BHF	ALG1BHF1	Glycerol	1	-10	7.72e-09	-8.11232	-16.1184	0.768827	-1	0.0945635	absent
ALG1	BHF1	ALG	BHF	ALG1BHF1	Glucose	1	-10	6.11e-09	-8.21366	-11.8081	0.768827	-0.124109	0.0612509	absent
ALG1	BHF1	ALG	BHF	ALG1BHF1	Glucose	2	-10	1.32e-08	-7.87867	-11.7749	0.768827	-0.124109	0.0612509	absent
ALG1	BHF1	ALG	BHF	ALG1BHF1	UY	1	-10	3.06e-08	-7.51367	-10.8062	0.768827	-10	-10	absent
ALG1	BHF1	ALG	BHF	ALG1BHF1	UY	2	-10	1.4e-08	-7.85305	-15.5999	0.768827	-10	-10	absent
ALG1	BKR1	ALG	BKR	ALG1BKR1	Glycerol	2	0.0461843	1.94e-08	-7.71275	-11.5438	0.779545	-1	-1	absent
ALG1	BKR1	ALG	BKR	ALG1BKR1	Glycerol	1	0.0461843	7.72e-09	-8.11232	-11.7825	0.779545	-1	-1	absent
ALG1	BKR1	ALG	BKR	ALG1BKR1	Glucose	1	-10	6.11e-09	-8.21366	-11.9627	0.779545	-0.124109	-0.013402	absent
ALG1	BKR1	ALG	BKR	ALG1BKR1	Glucose	2	-10	1.32e-08	-7.87867	-11.2695	0.779545	-0.124109	-0.013402	absent
ALG1	BKR1	ALG	BKR	ALG1BKR1	UY	1	-10	3.06e-08	-7.51367	-10.7421	0.779545	-10	-10	absent
ALG1	BKR1	ALG	BKR	ALG1BKR1	UY	2	-10	1.4e-08	-7.85305	-11.3716	0.779545	-10	-10	absent
ALG1	BLL1	ALG	BLL	ALG1BLL1	Glycerol	2	0.04615	1.94e-08	-7.71275	-11.6	0.783561	-1	0.120353	absent
ALG1	BLL1	ALG	BLL	ALG1BLL1	Glycerol	1	0.04615	7.72e-09	-8.11232	-12.5639	0.783561	-1	0.120353	absent
ALG1	BLL1	ALG	BLL	ALG1BLL1	Glucose	1	-10	6.11e-09	-8.21366	-11.6486	0.783561	-0.124109	-1	absent
ALG1	BLL1	ALG	BLL	ALG1BLL1	Glucose	2	-10	1.32e-08	-7.87867	-11.577	0.783561	-0.124109	-1	absent
ALG1	BLL1	ALG	BLL	ALG1BLL1	UY	1	-10	3.06e-08	-7.51367	-10.5957	0.783561	-10	-10	absent
ALG1	BLL1	ALG	BLL	ALG1BLL1	UY	2	-10	1.4e-08	-7.85305	-11.8403	0.783561	-10	-10	absent
ALG1	BNI1	ALG	BNI	ALG1BNI1	Glycerol	2	-10	1.94e-08	-7.71275	-11.8967	0.780347	-1	-10	absent
ALG1	BNI1	ALG	BNI	ALG1BNI1	Glycerol	1	-10	7.72e-09	-8.11232	-13.2812	0.780347	-1	-10	absent
ALG1	BNI1	ALG	BNI	ALG1BNI1	Glucose	1	-10	6.11e-09	-8.21366	-12.6204	0.780347	-0.124109	-10	absent
ALG1	BNI1	ALG	BNI	ALG1BNI1	Glucose	2	-10	1.32e-08	-7.87867	-12.6043	0.780347	-0.124109	-10	absent
ALG1	BNI1	ALG	BNI	ALG1BNI1	UY	1	-10	3.06e-08	-7.51367	-15.0762	0.780347	-10	-10	absent
ALG1	BNI1	ALG	BNI	ALG1BNI1	UY	2	-10	1.4e-08	-7.85305	-15.7549	0.780347	-10	-10	absent
ALG1	BQG1	ALG	BQG	ALG1BQG1	Glycerol	2	0.0471008	1.94e-08	-7.71275	-11.2374	0.779306	-1	0.0537228	absent
ALG1	BQG1	ALG	BQG	ALG1BQG1	Glycerol	1	0.0471008	7.72e-09	-8.11232	-11.9148	0.779306	-1	0.0537228	absent
ALG1	BQG1	ALG	BQG	ALG1BQG1	Glucose	1	-10	6.11e-09	-8.21366	-11.8121	0.779306	-0.124109	-0.0571925	absent
ALG1	BQG1	ALG	BQG	ALG1BQG1	Glucose	2	-10	1.32e-08	-7.87867	-11.3853	0.779306	-0.124109	-0.0571925	absent
ALG1	BQG1	ALG	BQG	ALG1BQG1	UY	1	-10	3.06e-08	-7.51367	-10.4342	0.779306	-10	-10	absent
ALG1	BQG1	ALG	BQG	ALG1BQG1	UY	2	-10	1.4e-08	-7.85305	-11.4351	0.779306	-10	-10	absent
ALG1	BNK1	ALG	BNK	ALG1BNK1	Glycerol	2	-10	1.94e-08	-7.71275	-10.9435	0.780836	-1	0.115878	absent
ALG1	BNK1	ALG	BNK	ALG1BNK1	Glycerol	1	-10	7.72e-09	-8.11232	-11.2932	0.780836	-1	0.115878	absent
ALG1	BNK1	ALG	BNK	ALG1BNK1	Glucose	1	-10	6.11e-09	-8.21366	-11.3187	0.780836	-0.124109	-0.0796816	absent
ALG1	BNK1	ALG	BNK	ALG1BNK1	Glucose	2	-10	1.32e-08	-7.87867	-11.202	0.780836	-0.124109	-0.0796816	absent
ALG1	BNK1	ALG	BNK	ALG1BNK1	UY	1	-10	3.06e-08	-7.51367	-10.347	0.780836	-10	-10	absent
ALG1	BNK1	ALG	BNK	ALG1BNK1	UY	2	-10	1.4e-08	-7.85305	-11.1613	0.780836	-10	-10	absent
ALG1	BPQ1	ALG	BPQ	ALG1BPQ1	Glycerol	2	-0.0215838	1.94e-08	-7.71275	-10.9969	0.780851	-1	0.0632255	absent
ALG1	BPQ1	ALG	BPQ	ALG1BPQ1	Glycerol	1	-0.0215838	7.72e-09	-8.11232	-11.1808	0.780851	-1	0.0632255	absent
ALG1	BPQ1	ALG	BPQ	ALG1BPQ1	Glucose	1	0.0251354	6.11e-09	-8.21366	-11.5731	0.780851	-0.124109	0.00714221	absent
ALG1	BPQ1	ALG	BPQ	ALG1BPQ1	Glucose	2	0.0251354	1.32e-08	-7.87867	-11.2706	0.780851	-0.124109	0.00714221	absent
ALG1	BPQ1	ALG	BPQ	ALG1BPQ1	UY	1	-10	3.06e-08	-7.51367	-10.9155	0.780851	-10	-10	absent
ALG1	BPQ1	ALG	BPQ	ALG1BPQ1	UY	2	-10	1.4e-08	-7.85305	-11.0063	0.780851	-10	-10	absent
ALG1	BQH1	ALG	BQH	ALG1BQH1	Glycerol	2	-10	1.94e-08	-7.71275	-15.869	0.783739	-1	-1	absent
ALG1	BQH1	ALG	BQH	ALG1BQH1	Glycerol	1	-10	7.72e-09	-8.11232	-16.6681	0.783739	-1	-1	absent
ALG1	BQH1	ALG	BQH	ALG1BQH1	Glucose	1	-10	6.11e-09	-8.21366	-13.4313	0.783739	-0.124109	0.0201877	absent
ALG1	BQH1	ALG	BQH	ALG1BQH1	Glucose	2	-10	1.32e-08	-7.87867	-16.2008	0.783739	-0.124109	0.0201877	absent
ALG1	BQH1	ALG	BQH	ALG1BQH1	UY	1	-10	3.06e-08	-7.51367	-15.4708	0.783739	-10	-10	absent
ALG1	BQH1	ALG	BQH	ALG1BQH1	UY	2	-10	1.4e-08	-7.85305	-16.1495	0.783739	-10	-10	absent
ALG1	BRA1	ALG	BRA	ALG1BRA1	Glycerol	2	-10	1.94e-08	-7.71275	-10.8388	0.78498	-1	-1	absent
ALG1	BRA1	ALG	BRA	ALG1BRA1	Glycerol	1	-10	7.72e-09	-8.11232	-11.4023	0.78498	-1	-1	absent
ALG1	BRA1	ALG	BRA	ALG1BRA1	Glucose	1	-10	6.11e-09	-8.21366	-11.5806	0.78498	-0.124109	-0.0988197	absent
ALG1	BRA1	ALG	BRA	ALG1BRA1	Glucose	2	-10	1.32e-08	-7.87867	-11.1064	0.78498	-0.124109	-0.0988197	absent
ALG1	BRA1	ALG	BRA	ALG1BRA1	UY	1	-10	3.06e-08	-7.51367	-10.8404	0.78498	-10	-10	absent
ALG1	BRA1	ALG	BRA	ALG1BRA1	UY	2	-10	1.4e-08	-7.85305	-11.5508	0.78498	-10	-10	absent
ALG1	BLN1	ALG	BLN	ALG1BLN1	Glycerol	2	-10	1.94e-08	-7.71275	-15.3552	0.777824	-1	-10	absent
ALG1	BLN1	ALG	BLN	ALG1BLN1	Glycerol	1	-10	7.72e-09	-8.11232	-16.1543	0.777824	-1	-10	absent
ALG1	BLN1	ALG	BLN	ALG1BLN1	Glucose	1	-10	6.11e-09	-8.21366	-12.6215	0.777824	-0.124109	-10	absent
ALG1	BLN1	ALG	BLN	ALG1BLN1	Glucose	2	-10	1.32e-08	-7.87867	-12.1947	0.777824	-0.124109	-10	absent
ALG1	BLN1	ALG	BLN	ALG1BLN1	UY	1	-10	3.06e-08	-7.51367	-14.9571	0.777824	-10	-10	absent
ALG1	BLN1	ALG	BLN	ALG1BLN1	UY	2	-10	1.4e-08	-7.85305	-11.83	0.777824	-10	-10	absent
ALG1	BQI1	ALG	BQI	ALG1BQI1	Glycerol	2	0.0642309	1.94e-08	-7.71275	-15.5214	0.780832	-1	-0.01173	absent
ALG1	BQI1	ALG	BQI	ALG1BQI1	Glycerol	1	0.0642309	7.72e-09	-8.11232	-12.7942	0.780832	-1	-0.01173	absent
ALG1	BQI1	ALG	BQI	ALG1BQI1	Glucose	1	-10	6.11e-09	-8.21366	-13.2249	0.780832	-0.124109	-0.108288	absent
ALG1	BQI1	ALG	BQI	ALG1BQI1	Glucose	2	-10	1.32e-08	-7.87867	-12.6114	0.780832	-0.124109	-0.108288	absent
ALG1	BQI1	ALG	BQI	ALG1BQI1	UY	1	-10	3.06e-08	-7.51367	-11.2208	0.780832	-10	-10	absent
ALG1	BQI1	ALG	BQI	ALG1BQI1	UY	2	-10	1.4e-08	-7.85305	-11.5315	0.780832	-10	-10	absent
ALG1	BRB1	ALG	BRB	ALG1BRB1	Glycerol	2	-0.0664249	1.94e-08	-7.71275	-11.2703	0.799221	-1	0.000627839	absent
ALG1	BRB1	ALG	BRB	ALG1BRB1	Glycerol	1	-0.0664249	7.72e-09	-8.11232	-12.096	0.799221	-1	0.000627839	absent
ALG1	BRB1	ALG	BRB	ALG1BRB1	Glucose	1	-0.000769146	6.11e-09	-8.21366	-10.9432	0.799221	-0.124109	0.0350566	absent
ALG1	BRB1	ALG	BRB	ALG1BRB1	Glucose	2	-0.000769146	1.32e-08	-7.87867	-10.5661	0.799221	-0.124109	0.0350566	absent
ALG1	BRB1	ALG	BRB	ALG1BRB1	UY	1	-10	3.06e-08	-7.51367	-10.4604	0.799221	-10	-10	absent
ALG1	BRB1	ALG	BRB	ALG1BRB1	UY	2	-10	1.4e-08	-7.85305	-11.4436	0.799221	-10	-10	absent
ALG1	BLP1	ALG	BLP	ALG1BLP1	Glycerol	2	-10	1.94e-08	-7.71275	-15.438	0.778209	-1	0.0191829	absent
ALG1	BLP1	ALG	BLP	ALG1BLP1	Glycerol	1	-10	7.72e-09	-8.11232	-12.5152	0.778209	-1	0.0191829	absent
ALG1	BLP1	ALG	BLP	ALG1BLP1	Glucose	1	-10	6.11e-09	-8.21366	-16.4398	0.778209	-0.124109	0.0477277	absent
ALG1	BLP1	ALG	BLP	ALG1BLP1	Glucose	2	-10	1.32e-08	-7.87867	-15.7698	0.778209	-0.124109	0.0477277	absent
ALG1	BLP1	ALG	BLP	ALG1BLP1	UY	1	-10	3.06e-08	-7.51367	-15.0398	0.778209	-10	-10	absent
ALG1	BLP1	ALG	BLP	ALG1BLP1	UY	2	-10	1.4e-08	-7.85305	-15.7186	0.778209	-10	-10	absent
ALG1	BRC1	ALG	BRC	ALG1BRC1	Glycerol	2	-10	1.94e-08	-7.71275	-10.9041	0.773418	-1	-0.0845599	absent
ALG1	BRC1	ALG	BRC	ALG1BRC1	Glycerol	1	-10	7.72e-09	-8.11232	-11.1117	0.773418	-1	-0.0845599	absent
ALG1	BRC1	ALG	BRC	ALG1BRC1	Glucose	1	-0.0319731	6.11e-09	-8.21366	-11.1073	0.773418	-0.124109	-0.0843597	absent
ALG1	BRC1	ALG	BRC	ALG1BRC1	Glucose	2	-0.0319731	1.32e-08	-7.87867	-10.8985	0.773418	-0.124109	-0.0843597	absent
ALG1	BRC1	ALG	BRC	ALG1BRC1	UY	1	-10	3.06e-08	-7.51367	-11.5592	0.773418	-10	-10	absent
ALG1	BRC1	ALG	BRC	ALG1BRC1	UY	2	-10	1.4e-08	-7.85305	-11.1378	0.773418	-10	-10	absent
ALG1	BPT1	ALG	BPT	ALG1BPT1	Glycerol	2	-10	1.94e-08	-7.71275	-11.4219	0.77716	-1	0.0527905	absent
ALG1	BPT1	ALG	BPT	ALG1BPT1	Glycerol	1	-10	7.72e-09	-8.11232	-11.504	0.77716	-1	0.0527905	absent
ALG1	BPT1	ALG	BPT	ALG1BPT1	Glucose	1	-10	6.11e-09	-8.21366	-11.8963	0.77716	-0.124109	-0.0226414	absent
ALG1	BPT1	ALG	BPT	ALG1BPT1	Glucose	2	-10	1.32e-08	-7.87867	-11.6307	0.77716	-0.124109	-0.0226414	absent
ALG1	BPT1	ALG	BPT	ALG1BPT1	UY	1	-10	3.06e-08	-7.51367	-10.8337	0.77716	-10	-10	absent
ALG1	BPT1	ALG	BPT	ALG1BPT1	UY	2	-10	1.4e-08	-7.85305	-11.4156	0.77716	-10	-10	absent
ALG1	BRD1	ALG	BRD	ALG1BRD1	Glycerol	2	0.00110038	1.94e-08	-7.71275	-15.4019	0.774287	-1	0.10436	absent
ALG1	BRD1	ALG	BRD	ALG1BRD1	Glycerol	1	0.00110038	7.72e-09	-8.11232	-12.3569	0.774287	-1	0.10436	absent
ALG1	BRD1	ALG	BRD	ALG1BRD1	Glucose	1	-0.0270373	6.11e-09	-8.21366	-11.4937	0.774287	-0.124109	-0.0248454	absent
ALG1	BRD1	ALG	BRD	ALG1BRD1	Glucose	2	-0.0270373	1.32e-08	-7.87867	-11.1614	0.774287	-0.124109	-0.0248454	absent
ALG1	BRD1	ALG	BRD	ALG1BRD1	UY	1	-10	3.06e-08	-7.51367	-11.3112	0.774287	-10	-10	absent
ALG1	BRD1	ALG	BRD	ALG1BRD1	UY	2	-10	1.4e-08	-7.85305	-11.9965	0.774287	-10	-10	absent
ALG1	BMK1	ALG	BMK	ALG1BMK1	Glycerol	2	-10	1.94e-08	-7.71275	-11.965	0.778872	-1	0.0727937	absent
ALG1	BMK1	ALG	BMK	ALG1BMK1	Glycerol	1	-10	7.72e-09	-8.11232	-15.9396	0.778872	-1	0.0727937	absent
ALG1	BMK1	ALG	BMK	ALG1BMK1	Glucose	1	-10	6.11e-09	-8.21366	-11.4337	0.778872	-0.124109	0.0206207	absent
ALG1	BMK1	ALG	BMK	ALG1BMK1	Glucose	2	-10	1.32e-08	-7.87867	-11.1481	0.778872	-0.124109	0.0206207	absent
ALG1	BMK1	ALG	BMK	ALG1BMK1	UY	1	-10	3.06e-08	-7.51367	-10.7032	0.778872	-10	-10	absent
ALG1	BMK1	ALG	BMK	ALG1BMK1	UY	2	-10	1.4e-08	-7.85305	-12.0381	0.778872	-10	-10	absent
ALG1	BQP1	ALG	BQP	ALG1BQP1	Glycerol	2	-10	1.94e-08	-7.71275	-15.2754	0.782626	-1	-0.0301991	absent
ALG1	BQP1	ALG	BQP	ALG1BQP1	Glycerol	1	-10	7.72e-09	-8.11232	-12.1784	0.782626	-1	-0.0301991	absent
ALG1	BQP1	ALG	BQP	ALG1BQP1	Glucose	1	-0.0700704	6.11e-09	-8.21366	-11.3805	0.782626	-0.124109	0.0119541	absent
ALG1	BQP1	ALG	BQP	ALG1BQP1	Glucose	2	-0.0700704	1.32e-08	-7.87867	-10.8983	0.782626	-0.124109	0.0119541	absent
ALG1	BQP1	ALG	BQP	ALG1BQP1	UY	1	-10	3.06e-08	-7.51367	-11.1721	0.782626	-10	-10	absent
ALG1	BQP1	ALG	BQP	ALG1BQP1	UY	2	-10	1.4e-08	-7.85305	-15.556	0.782626	-10	-10	absent
ALG1	BLV1	ALG	BLV	ALG1BLV1	Glycerol	2	-10	1.94e-08	-7.71275	-11.7411	0.779241	-1	0.0838921	absent
ALG1	BLV1	ALG	BLV	ALG1BLV1	Glycerol	1	-10	7.72e-09	-8.11232	-12.873	0.779241	-1	0.0838921	absent
ALG1	BLV1	ALG	BLV	ALG1BLV1	Glucose	1	-10	6.11e-09	-8.21366	-12.8984	0.779241	-0.124109	-0.0681483	absent
ALG1	BLV1	ALG	BLV	ALG1BLV1	Glucose	2	-10	1.32e-08	-7.87867	-12.0672	0.779241	-0.124109	-0.0681483	absent
ALG1	BLV1	ALG	BLV	ALG1BLV1	UY	1	-10	3.06e-08	-7.51367	-14.9601	0.779241	-10	-10	absent
ALG1	BLV1	ALG	BLV	ALG1BLV1	UY	2	-10	1.4e-08	-7.85305	-15.6389	0.779241	-10	-10	absent
ALG1	BQQ1	ALG	BQQ	ALG1BQQ1	Glycerol	2	-10	1.94e-08	-7.71275	-15.8465	0.775988	-1	0.0824425	absent
ALG1	BQQ1	ALG	BQQ	ALG1BQQ1	Glycerol	1	-10	7.72e-09	-8.11232	-16.6456	0.775988	-1	0.0824425	absent
ALG1	BQQ1	ALG	BQQ	ALG1BQQ1	Glucose	1	-10	6.11e-09	-8.21366	-13.3968	0.775988	-0.124109	0.0291802	absent
ALG1	BQQ1	ALG	BQQ	ALG1BQQ1	Glucose	2	-10	1.32e-08	-7.87867	-16.1783	0.775988	-0.124109	0.0291802	absent
ALG1	BQQ1	ALG	BQQ	ALG1BQQ1	UY	1	-10	3.06e-08	-7.51367	-15.4483	0.775988	-10	-10	absent
ALG1	BQQ1	ALG	BQQ	ALG1BQQ1	UY	2	-10	1.4e-08	-7.85305	-16.1271	0.775988	-10	-10	absent
ALG1	BMA1	ALG	BMA	ALG1BMA1	Glycerol	2	-10	1.94e-08	-7.71275	-11.6084	1.3926	-1	0.0885346	absent
ALG1	BMA1	ALG	BMA	ALG1BMA1	Glycerol	1	-10	7.72e-09	-8.11232	-16.105	1.3926	-1	0.0885346	absent
ALG1	BMA1	ALG	BMA	ALG1BMA1	Glucose	1	-10	6.11e-09	-8.21366	-11.9453	1.3926	-0.124109	0.0277247	absent
ALG1	BMA1	ALG	BMA	ALG1BMA1	Glucose	2	-10	1.32e-08	-7.87867	-11.6364	1.3926	-0.124109	0.0277247	absent
ALG1	BMA1	ALG	BMA	ALG1BMA1	UY	1	-10	3.06e-08	-7.51367	-14.9077	1.3926	-10	-10	absent
ALG1	BMA1	ALG	BMA	ALG1BMA1	UY	2	-10	1.4e-08	-7.85305	-11.5715	1.3926	-10	-10	absent
ALG1	BQR1	ALG	BQR	ALG1BQR1	Glycerol	2	0.0276484	1.94e-08	-7.71275	-11.3674	0.77567	-1	0.0588489	absent
ALG1	BQR1	ALG	BQR	ALG1BQR1	Glycerol	1	0.0276484	7.72e-09	-8.11232	-11.9509	0.77567	-1	0.0588489	absent
ALG1	BQR1	ALG	BQR	ALG1BQR1	Glucose	1	-10	6.11e-09	-8.21366	-12.6799	0.77567	-0.124109	-0.0545715	absent
ALG1	BQR1	ALG	BQR	ALG1BQR1	Glucose	2	-10	1.32e-08	-7.87867	-11.5756	0.77567	-0.124109	-0.0545715	absent
ALG1	BQR1	ALG	BQR	ALG1BQR1	UY	1	-10	3.06e-08	-7.51367	-10.8201	0.77567	-10	-10	absent
ALG1	BQR1	ALG	BQR	ALG1BQR1	UY	2	-10	1.4e-08	-7.85305	-11.4463	0.77567	-10	-10	absent
ALG1	CAD1	ALG	CAD	ALG1CAD1	Glycerol	2	-10	1.94e-08	-7.71275	-15.0248	0.867471	-1	-10	absent
ALG1	CAD1	ALG	CAD	ALG1CAD1	Glycerol	1	-10	7.72e-09	-8.11232	-15.8239	0.867471	-1	-10	absent
ALG1	CAD1	ALG	CAD	ALG1CAD1	Glucose	1	-10	6.11e-09	-8.21366	-16.0266	0.867471	-0.124109	-0.0194773	absent
ALG1	CAD1	ALG	CAD	ALG1CAD1	Glucose	2	-10	1.32e-08	-7.87867	-15.3566	0.867471	-0.124109	-0.0194773	absent
ALG1	CAD1	ALG	CAD	ALG1CAD1	UY	1	-10	3.06e-08	-7.51367	-14.6266	0.867471	-10	-10	absent
ALG1	CAD1	ALG	CAD	ALG1CAD1	UY	2	-10	1.4e-08	-7.85305	-15.3054	0.867471	-10	-10	absent
ALG1	BSB1	ALG	BSB	ALG1BSB1	Glycerol	2	-10	1.94e-08	-7.71275	-16.2913	0.770753	-1	-10	absent
ALG1	BSB1	ALG	BSB	ALG1BSB1	Glycerol	1	-10	7.72e-09	-8.11232	-17.0905	0.770753	-1	-10	absent
ALG1	BSB1	ALG	BSB	ALG1BSB1	Glucose	1	-10	6.11e-09	-8.21366	-13.0733	0.770753	-0.124109	-10	absent
ALG1	BSB1	ALG	BSB	ALG1BSB1	Glucose	2	-10	1.32e-08	-7.87867	-13.5492	0.770753	-0.124109	-10	absent
ALG1	BSB1	ALG	BSB	ALG1BSB1	UY	1	-10	3.06e-08	-7.51367	-15.8932	0.770753	-10	-10	absent
ALG1	BSB1	ALG	BSB	ALG1BSB1	UY	2	-10	1.4e-08	-7.85305	-16.5719	0.770753	-10	-10	absent
ALG1	BTH1	ALG	BTH	ALG1BTH1	Glycerol	2	-10	1.94e-08	-7.71275	-10.3737	0.770225	-1	-1	absent
ALG1	BTH1	ALG	BTH	ALG1BTH1	Glycerol	1	-10	7.72e-09	-8.11232	-10.6428	0.770225	-1	-1	absent
ALG1	BTH1	ALG	BTH	ALG1BTH1	Glucose	1	-10	6.11e-09	-8.21366	-11.4163	0.770225	-0.124109	-0.01391	absent
ALG1	BTH1	ALG	BTH	ALG1BTH1	Glucose	2	-10	1.32e-08	-7.87867	-11.0596	0.770225	-0.124109	-0.01391	absent
ALG1	BTH1	ALG	BTH	ALG1BTH1	UY	1	-10	3.06e-08	-7.51367	-10.8481	0.770225	-10	-10	absent
ALG1	BTH1	ALG	BTH	ALG1BTH1	UY	2	-10	1.4e-08	-7.85305	-10.3863	0.770225	-10	-10	absent
ALG1	AHP1	ALG	AHP	ALG1AHP1	Glycerol	2	-10	1.94e-08	-7.71275	-15.3363	0.874692	-1	0.0888156	absent
ALG1	AHP1	ALG	AHP	ALG1AHP1	Glycerol	1	-10	7.72e-09	-8.11232	-16.1354	0.874692	-1	0.0888156	absent
ALG1	AHP1	ALG	AHP	ALG1AHP1	Glucose	1	-10	6.11e-09	-8.21366	-16.3381	0.874692	-0.124109	-1	absent
ALG1	AHP1	ALG	AHP	ALG1AHP1	Glucose	2	-10	1.32e-08	-7.87867	-15.6681	0.874692	-0.124109	-1	absent
ALG1	AHP1	ALG	AHP	ALG1AHP1	UY	1	-10	3.06e-08	-7.51367	-14.9381	0.874692	-10	-10	absent
ALG1	AHP1	ALG	AHP	ALG1AHP1	UY	2	-10	1.4e-08	-7.85305	-15.6169	0.874692	-10	-10	absent
ALG1	CQD1	ALG	CQD	ALG1CQD1	Glycerol	2	-10	1.94e-08	-7.71275	-12.0364	0.941244	-1	-10	absent
ALG1	CQD1	ALG	CQD	ALG1CQD1	Glycerol	1	-10	7.72e-09	-8.11232	-12.3742	0.941244	-1	-10	absent
ALG1	CQD1	ALG	CQD	ALG1CQD1	Glucose	1	-10	6.11e-09	-8.21366	-12.4404	0.941244	-0.124109	0.0106465	absent
ALG1	CQD1	ALG	CQD	ALG1CQD1	Glucose	2	-10	1.32e-08	-7.87867	-11.8557	0.941244	-0.124109	0.0106465	absent
ALG1	CQD1	ALG	CQD	ALG1CQD1	UY	1	-10	3.06e-08	-7.51367	-15.2141	0.941244	-10	-10	absent
ALG1	CQD1	ALG	CQD	ALG1CQD1	UY	2	-10	1.4e-08	-7.85305	-15.8929	0.941244	-10	-10	absent
ALG1	APV1	ALG	APV	ALG1APV1	Glycerol	2	0.0202867	1.94e-08	-7.71275	-10.6741	0.775983	-1	0.176787	absent
ALG1	APV1	ALG	APV	ALG1APV1	Glycerol	1	0.0202867	7.72e-09	-8.11232	-11.1065	0.775983	-1	0.176787	absent
ALG1	APV1	ALG	APV	ALG1APV1	Glucose	1	-10	6.11e-09	-8.21366	-11.8993	0.775983	-0.124109	-0.0613302	absent
ALG1	APV1	ALG	APV	ALG1APV1	Glucose	2	-10	1.32e-08	-7.87867	-11.3791	0.775983	-0.124109	-0.0613302	absent
ALG1	APV1	ALG	APV	ALG1APV1	UY	1	-10	3.06e-08	-7.51367	-10.4253	0.775983	-10	-10	absent
ALG1	APV1	ALG	APV	ALG1APV1	UY	2	-10	1.4e-08	-7.85305	-11.1867	0.775983	-10	-10	absent
ALG1	AST1	ALG	AST	ALG1AST1	Glycerol	2	-10	1.94e-08	-7.71275	-10.947	0.776706	-1	-1	absent
ALG1	AST1	ALG	AST	ALG1AST1	Glycerol	1	-10	7.72e-09	-8.11232	-11.3577	0.776706	-1	-1	absent
ALG1	AST1	ALG	AST	ALG1AST1	Glucose	1	-1	6.11e-09	-8.21366	-11.8331	0.776706	-0.124109	0.0143308	absent
ALG1	AST1	ALG	AST	ALG1AST1	Glucose	2	-1	1.32e-08	-7.87867	-11.5241	0.776706	-0.124109	0.0143308	absent
ALG1	AST1	ALG	AST	ALG1AST1	UY	1	-10	3.06e-08	-7.51367	-11.2593	0.776706	-10	-10	absent
ALG1	AST1	ALG	AST	ALG1AST1	UY	2	-10	1.4e-08	-7.85305	-10.9656	0.776706	-10	-10	absent
ALG1	CCV1	ALG	CCV	ALG1CCV1	Glycerol	2	-10	1.94e-08	-7.71275	-10.7895	1.21786	-1	-1	absent
ALG1	CCV1	ALG	CCV	ALG1CCV1	Glycerol	1	-10	7.72e-09	-8.11232	-11.5048	1.21786	-1	-1	absent
ALG1	CCV1	ALG	CCV	ALG1CCV1	Glucose	1	-10	6.11e-09	-8.21366	-11.9464	1.21786	-0.124109	0.044604	absent
ALG1	CCV1	ALG	CCV	ALG1CCV1	Glucose	2	-10	1.32e-08	-7.87867	-11.2503	1.21786	-0.124109	0.044604	absent
ALG1	CCV1	ALG	CCV	ALG1CCV1	UY	1	-10	3.06e-08	-7.51367	-11.1936	1.21786	-10	-10	absent
ALG1	CCV1	ALG	CCV	ALG1CCV1	UY	2	-10	1.4e-08	-7.85305	-10.8945	1.21786	-10	-10	absent
ALG1	YAR1	ALG	YAR	ALG1YAR1	Glycerol	2	-10	1.94e-08	-7.71275	-15.5742	0.941383	-1	-1	absent
ALG1	YAR1	ALG	YAR	ALG1YAR1	Glycerol	1	-10	7.72e-09	-8.11232	-16.3734	0.941383	-1	-1	absent
ALG1	YAR1	ALG	YAR	ALG1YAR1	Glucose	1	-10	6.11e-09	-8.21366	-12.3292	0.941383	-0.124109	-0.0705407	absent
ALG1	YAR1	ALG	YAR	ALG1YAR1	Glucose	2	-10	1.32e-08	-7.87867	-12.0519	0.941383	-0.124109	-0.0705407	absent
ALG1	YAR1	ALG	YAR	ALG1YAR1	UY	1	-10	3.06e-08	-7.51367	-11.5175	0.941383	-10	-10	absent
ALG1	YAR1	ALG	YAR	ALG1YAR1	UY	2	-10	1.4e-08	-7.85305	-15.8548	0.941383	-10	-10	absent
ALG1	YBU1	ALG	YBU	ALG1YBU1	Glycerol	2	-10	1.94e-08	-7.71275	-10.852	1.14622	-1	-1	absent
ALG1	YBU1	ALG	YBU	ALG1YBU1	Glycerol	1	-10	7.72e-09	-8.11232	-11.4044	1.14622	-1	-1	absent
ALG1	YBU1	ALG	YBU	ALG1YBU1	Glucose	1	-10	6.11e-09	-8.21366	-16.3484	1.14622	-0.124109	-10	absent
ALG1	YBU1	ALG	YBU	ALG1YBU1	Glucose	2	-10	1.32e-08	-7.87867	-15.6784	1.14622	-0.124109	-10	absent
ALG1	YBU1	ALG	YBU	ALG1YBU1	UY	1	-10	3.06e-08	-7.51367	-14.9484	1.14622	-10	-10	absent
ALG1	YBU1	ALG	YBU	ALG1YBU1	UY	2	-10	1.4e-08	-7.85305	-10.9923	1.14622	-10	-10	absent
AIK1	AKB1	AIK	AKB	AIK1AKB1	Glycerol	2	-10	1.94e-08	-7.71275	-11.765	1.53817	0.0365608	-1	absent
AIK1	AKB1	AIK	AKB	AIK1AKB1	Glycerol	1	-10	7.72e-09	-8.11232	-12.056	1.53817	0.0365608	-1	absent
AIK1	AKB1	AIK	AKB	AIK1AKB1	Glucose	1	-10	6.11e-09	-8.21366	-12.3962	1.53817	0.00753623	-0.0154866	absent
AIK1	AKB1	AIK	AKB	AIK1AKB1	Glucose	2	-10	1.32e-08	-7.87867	-8.98057	1.53817	0.00753623	-0.0154866	absent
AIK1	AKB1	AIK	AKB	AIK1AKB1	UY	1	-10	3.06e-08	-7.51367	-11.4115	1.53817	-10	-10	absent
AIK1	AKB1	AIK	AKB	AIK1AKB1	UY	2	-10	1.4e-08	-7.85305	-11.9862	1.53817	-10	-10	absent
AIK1	AKP1	AIK	AKP	AIK1AKP1	Glycerol	2	-10	1.94e-08	-7.71275	-10.8077	0.181096	0.0365608	-0.109008	absent
AIK1	AKP1	AIK	AKP	AIK1AKP1	Glycerol	1	-10	7.72e-09	-8.11232	-11.4814	0.181096	0.0365608	-0.109008	absent
AIK1	AKP1	AIK	AKP	AIK1AKP1	Glucose	1	-0.0565989	6.11e-09	-8.21366	-11.2537	0.181096	0.00753623	-0.0557565	absent
AIK1	AKP1	AIK	AKP	AIK1AKP1	Glucose	2	-0.0565989	1.32e-08	-7.87867	-7.86564	0.181096	0.00753623	-0.0557565	absent
AIK1	AKP1	AIK	AKP	AIK1AKP1	UY	1	-10	3.06e-08	-7.51367	-10.6779	0.181096	-10	-10	absent
AIK1	AKP1	AIK	AKP	AIK1AKP1	UY	2	-10	1.4e-08	-7.85305	-10.9496	0.181096	-10	-10	absent
AIK1	ALG1	AIK	ALG	AIK1ALG1	Glycerol	2	-10	1.94e-08	-7.71275	-15.5158	0.777725	0.0365608	-0.0464457	absent
AIK1	ALG1	AIK	ALG	AIK1ALG1	Glycerol	1	-10	7.72e-09	-8.11232	-16.315	0.777725	0.0365608	-0.0464457	absent
AIK1	ALG1	AIK	ALG	AIK1ALG1	Glucose	1	-10	6.11e-09	-8.21366	-16.5176	0.777725	0.00753623	-0.141619	absent
AIK1	ALG1	AIK	ALG	AIK1ALG1	Glucose	2	-10	1.32e-08	-7.87867	-12.5062	0.777725	0.00753623	-0.141619	absent
AIK1	ALG1	AIK	ALG	AIK1ALG1	UY	1	-10	3.06e-08	-7.51367	-15.1177	0.777725	-10	-10	absent
AIK1	ALG1	AIK	ALG	AIK1ALG1	UY	2	-10	1.4e-08	-7.85305	-15.7964	0.777725	-10	-10	absent
AIK1	ANG1	AIK	ANG	AIK1ANG1	Glycerol	2	-10	1.94e-08	-7.71275	-15.8974	1.32678	0.0365608	-1	absent
AIK1	ANG1	AIK	ANG	AIK1ANG1	Glycerol	1	-10	7.72e-09	-8.11232	-16.6966	1.32678	0.0365608	-1	absent
AIK1	ANG1	AIK	ANG	AIK1ANG1	Glucose	1	-10	6.11e-09	-8.21366	-16.8992	1.32678	0.00753623	0.0663533	absent
AIK1	ANG1	AIK	ANG	AIK1ANG1	Glucose	2	-10	1.32e-08	-7.87867	-12.8878	1.32678	0.00753623	0.0663533	absent
AIK1	ANG1	AIK	ANG	AIK1ANG1	UY	1	-10	3.06e-08	-7.51367	-15.4993	1.32678	-10	-10	absent
AIK1	ANG1	AIK	ANG	AIK1ANG1	UY	2	-10	1.4e-08	-7.85305	-16.178	1.32678	-10	-10	absent
AIK1	AIM1	AIK	AIM	AIK1AIM1	Glycerol	2	-10	1.94e-08	-7.71275	-15.6831	0.263505	0.0365608	-10	absent
AIK1	AIM1	AIK	AIM	AIK1AIM1	Glycerol	1	-10	7.72e-09	-8.11232	-16.4822	0.263505	0.0365608	-10	absent
AIK1	AIM1	AIK	AIM	AIK1AIM1	Glucose	1	-10	6.11e-09	-8.21366	-16.6849	0.263505	0.00753623	-10	absent
AIK1	AIM1	AIK	AIM	AIK1AIM1	Glucose	2	-10	1.32e-08	-7.87867	-12.6734	0.263505	0.00753623	-10	absent
AIK1	AIM1	AIK	AIM	AIK1AIM1	UY	1	-10	3.06e-08	-7.51367	-15.2849	0.263505	-10	-10	absent
AIK1	AIM1	AIK	AIM	AIK1AIM1	UY	2	-10	1.4e-08	-7.85305	-15.9637	0.263505	-10	-10	absent
AIK1	AKV1	AIK	AKV	AIK1AKV1	Glycerol	2	-10	1.94e-08	-7.71275	-10.5744	0.181149	0.0365608	-0.0735332	absent
AIK1	AKV1	AIK	AKV	AIK1AKV1	Glycerol	1	-10	7.72e-09	-8.11232	-11.3627	0.181149	0.0365608	-0.0735332	absent
AIK1	AKV1	AIK	AKV	AIK1AKV1	Glucose	1	-0.080599	6.11e-09	-8.21366	-11.2212	0.181149	0.00753623	-0.033945	absent
AIK1	AKV1	AIK	AKV	AIK1AKV1	Glucose	2	-0.080599	1.32e-08	-7.87867	-7.48649	0.181149	0.00753623	-0.033945	absent
AIK1	AKV1	AIK	AKV	AIK1AKV1	UY	1	-10	3.06e-08	-7.51367	-10.5468	0.181149	-10	-10	absent
AIK1	AKV1	AIK	AKV	AIK1AKV1	UY	2	-10	1.4e-08	-7.85305	-11.136	0.181149	-10	-10	absent
AIK1	BBI1	AIK	BBI	AIK1BBI1	Glycerol	2	-10	1.94e-08	-7.71275	-14.8859	0.188946	0.0365608	-0.0628554	absent
AIK1	BBI1	AIK	BBI	AIK1BBI1	Glycerol	1	-10	7.72e-09	-8.11232	-15.685	0.188946	0.0365608	-0.0628554	absent
AIK1	BBI1	AIK	BBI	AIK1BBI1	Glucose	1	-10	6.11e-09	-8.21366	-14.1164	0.188946	0.00753623	0.0118567	absent
AIK1	BBI1	AIK	BBI	AIK1BBI1	Glucose	2	-10	1.32e-08	-7.87867	-11.8762	0.188946	0.00753623	0.0118567	absent
AIK1	BBI1	AIK	BBI	AIK1BBI1	UY	1	-10	3.06e-08	-7.51367	-14.4877	0.188946	-10	-10	absent
AIK1	BBI1	AIK	BBI	AIK1BBI1	UY	2	-10	1.4e-08	-7.85305	-15.1665	0.188946	-10	-10	absent
AIK1	BAK1	AIK	BAK	AIK1BAK1	Glycerol	2	0.0293356	1.94e-08	-7.71275	-15.4348	1.47001	0.0365608	-0.00177197	absent
AIK1	BAK1	AIK	BAK	AIK1BAK1	Glycerol	1	0.0293356	7.72e-09	-8.11232	-12.8367	1.47001	0.0365608	-0.00177197	absent
AIK1	BAK1	AIK	BAK	AIK1BAK1	Glucose	1	-10	6.11e-09	-8.21366	-12.381	1.47001	0.00753623	0.0639478	absent
AIK1	BAK1	AIK	BAK	AIK1BAK1	Glucose	2	-10	1.32e-08	-7.87867	-8.76175	1.47001	0.00753623	0.0639478	absent
AIK1	BAK1	AIK	BAK	AIK1BAK1	UY	1	-10	3.06e-08	-7.51367	-11.4471	1.47001	-10	-10	absent
AIK1	BAK1	AIK	BAK	AIK1BAK1	UY	2	-10	1.4e-08	-7.85305	-11.681	1.47001	-10	-10	absent
AIK1	BEH1	AIK	BEH	AIK1BEH1	Glycerol	2	-10	1.94e-08	-7.71275	-15.1179	1.46474	0.0365608	-1	absent
AIK1	BEH1	AIK	BEH	AIK1BEH1	Glycerol	1	-10	7.72e-09	-8.11232	-15.917	1.46474	0.0365608	-1	absent
AIK1	BEH1	AIK	BEH	AIK1BEH1	Glucose	1	-10	6.11e-09	-8.21366	-16.1197	1.46474	0.00753623	-0.0314472	absent
AIK1	BEH1	AIK	BEH	AIK1BEH1	Glucose	2	-10	1.32e-08	-7.87867	-12.1082	1.46474	0.00753623	-0.0314472	absent
AIK1	BEH1	AIK	BEH	AIK1BEH1	UY	1	-10	3.06e-08	-7.51367	-14.7197	1.46474	-10	-10	absent
AIK1	BEH1	AIK	BEH	AIK1BEH1	UY	2	-10	1.4e-08	-7.85305	-15.3985	1.46474	-10	-10	absent
AIK1	BLA1	AIK	BLA	AIK1BLA1	Glycerol	2	-10	1.94e-08	-7.71275	-12.0909	0.172215	0.0365608	-10	absent
AIK1	BLA1	AIK	BLA	AIK1BLA1	Glycerol	1	-10	7.72e-09	-8.11232	-16.0344	0.172215	0.0365608	-10	absent
AIK1	BLA1	AIK	BLA	AIK1BLA1	Glucose	1	-10	6.11e-09	-8.21366	-12.0152	0.172215	0.00753623	-10	absent
AIK1	BLA1	AIK	BLA	AIK1BLA1	Glucose	2	-10	1.32e-08	-7.87867	-12.2256	0.172215	0.00753623	-10	absent
AIK1	BLA1	AIK	BLA	AIK1BLA1	UY	1	-10	3.06e-08	-7.51367	-13.1314	0.172215	-10	-10	absent
AIK1	BLA1	AIK	BLA	AIK1BLA1	UY	2	-10	1.4e-08	-7.85305	-11.8834	0.172215	-10	-10	absent
AIK1	BHM1	AIK	BHM	AIK1BHM1	Glycerol	2	-10	1.94e-08	-7.71275	-15.4997	0.264508	0.0365608	-1	absent
AIK1	BHM1	AIK	BHM	AIK1BHM1	Glycerol	1	-10	7.72e-09	-8.11232	-16.2988	0.264508	0.0365608	-1	absent
AIK1	BHM1	AIK	BHM	AIK1BHM1	Glucose	1	-10	6.11e-09	-8.21366	-16.5015	0.264508	0.00753623	-10	absent
AIK1	BHM1	AIK	BHM	AIK1BHM1	Glucose	2	-10	1.32e-08	-7.87867	-12.4901	0.264508	0.00753623	-10	absent
AIK1	BHM1	AIK	BHM	AIK1BHM1	UY	1	-10	3.06e-08	-7.51367	-15.1015	0.264508	-10	-10	absent
AIK1	BHM1	AIK	BHM	AIK1BHM1	UY	2	-10	1.4e-08	-7.85305	-15.7803	0.264508	-10	-10	absent
AIK1	BHN1	AIK	BHN	AIK1BHN1	Glycerol	2	-10	1.94e-08	-7.71275	-11.4652	0.183202	0.0365608	-1	absent
AIK1	BHN1	AIK	BHN	AIK1BHN1	Glycerol	1	-10	7.72e-09	-8.11232	-11.8033	0.183202	0.0365608	-1	absent
AIK1	BHN1	AIK	BHN	AIK1BHN1	Glucose	1	-0.0609088	6.11e-09	-8.21366	-11.6264	0.183202	0.00753623	-1	absent
AIK1	BHN1	AIK	BHN	AIK1BHN1	Glucose	2	-0.0609088	1.32e-08	-7.87867	-7.80488	0.183202	0.00753623	-1	absent
AIK1	BHN1	AIK	BHN	AIK1BHN1	UY	1	-10	3.06e-08	-7.51367	-10.955	0.183202	-10	-10	absent
AIK1	BHN1	AIK	BHN	AIK1BHN1	UY	2	-10	1.4e-08	-7.85305	-11.8582	0.183202	-10	-10	absent
AIK1	BHB1	AIK	BHB	AIK1BHB1	Glycerol	2	-10	1.94e-08	-7.71275	-11.2999	0.232525	0.0365608	-10	absent
AIK1	BHB1	AIK	BHB	AIK1BHB1	Glycerol	1	-10	7.72e-09	-8.11232	-11.7814	0.232525	0.0365608	-10	absent
AIK1	BHB1	AIK	BHB	AIK1BHB1	Glucose	1	-10	6.11e-09	-8.21366	-10.9417	0.232525	0.00753623	-10	absent
AIK1	BHB1	AIK	BHB	AIK1BHB1	Glucose	2	-10	1.32e-08	-7.87867	-7.36853	0.232525	0.00753623	-10	absent
AIK1	BHB1	AIK	BHB	AIK1BHB1	UY	1	-10	3.06e-08	-7.51367	-10.3404	0.232525	-10	-10	absent
AIK1	BHB1	AIK	BHB	AIK1BHB1	UY	2	-10	1.4e-08	-7.85305	-12.183	0.232525	-10	-10	absent
AIK1	BLE1	AIK	BLE	AIK1BLE1	Glycerol	2	-10	1.94e-08	-7.71275	-10.6094	0.174117	0.0365608	-0.044381	absent
AIK1	BLE1	AIK	BLE	AIK1BLE1	Glycerol	1	-10	7.72e-09	-8.11232	-10.9426	0.174117	0.0365608	-0.044381	absent
AIK1	BLE1	AIK	BLE	AIK1BLE1	Glucose	1	-10	6.11e-09	-8.21366	-11.4836	0.174117	0.00753623	-0.0748489	absent
AIK1	BLE1	AIK	BLE	AIK1BLE1	Glucose	2	-10	1.32e-08	-7.87867	-7.81523	0.174117	0.00753623	-0.0748489	absent
AIK1	BLE1	AIK	BLE	AIK1BLE1	UY	1	-10	3.06e-08	-7.51367	-10.6861	0.174117	-10	-10	absent
AIK1	BLE1	AIK	BLE	AIK1BLE1	UY	2	-10	1.4e-08	-7.85305	-10.8535	0.174117	-10	-10	absent
AIK1	BHF1	AIK	BHF	AIK1BHF1	Glycerol	2	-10	1.94e-08	-7.71275	-12.1414	0.171654	0.0365608	0.0945635	absent
AIK1	BHF1	AIK	BHF	AIK1BHF1	Glycerol	1	-10	7.72e-09	-8.11232	-16.1289	0.171654	0.0365608	0.0945635	absent
AIK1	BHF1	AIK	BHF	AIK1BHF1	Glucose	1	-10	6.11e-09	-8.21366	-11.8186	0.171654	0.00753623	0.0612509	absent
AIK1	BHF1	AIK	BHF	AIK1BHF1	Glucose	2	-10	1.32e-08	-7.87867	-8.44389	0.171654	0.00753623	0.0612509	absent
AIK1	BHF1	AIK	BHF	AIK1BHF1	UY	1	-10	3.06e-08	-7.51367	-10.8167	0.171654	-10	-10	absent
AIK1	BHF1	AIK	BHF	AIK1BHF1	UY	2	-10	1.4e-08	-7.85305	-15.6104	0.171654	-10	-10	absent
AIK1	BKR1	AIK	BKR	AIK1BKR1	Glycerol	2	-10	1.94e-08	-7.71275	-11.5543	0.17924	0.0365608	-1	absent
AIK1	BKR1	AIK	BKR	AIK1BKR1	Glycerol	1	-10	7.72e-09	-8.11232	-11.793	0.17924	0.0365608	-1	absent
AIK1	BKR1	AIK	BKR	AIK1BKR1	Glucose	1	-10	6.11e-09	-8.21366	-11.9732	0.17924	0.00753623	-0.013402	absent
AIK1	BKR1	AIK	BKR	AIK1BKR1	Glucose	2	-10	1.32e-08	-7.87867	-7.93851	0.17924	0.00753623	-0.013402	absent
AIK1	BKR1	AIK	BKR	AIK1BKR1	UY	1	-10	3.06e-08	-7.51367	-10.7526	0.17924	-10	-10	absent
AIK1	BKR1	AIK	BKR	AIK1BKR1	UY	2	-10	1.4e-08	-7.85305	-11.3821	0.17924	-10	-10	absent
AIK1	BLL1	AIK	BLL	AIK1BLL1	Glycerol	2	-0.0597118	1.94e-08	-7.71275	-11.6105	0.176716	0.0365608	0.120353	absent
AIK1	BLL1	AIK	BLL	AIK1BLL1	Glycerol	1	-0.0597118	7.72e-09	-8.11232	-12.5744	0.176716	0.0365608	0.120353	absent
AIK1	BLL1	AIK	BLL	AIK1BLL1	Glucose	1	-10	6.11e-09	-8.21366	-11.6591	0.176716	0.00753623	-1	absent
AIK1	BLL1	AIK	BLL	AIK1BLL1	Glucose	2	-10	1.32e-08	-7.87867	-8.24606	0.176716	0.00753623	-1	absent
AIK1	BLL1	AIK	BLL	AIK1BLL1	UY	1	-10	3.06e-08	-7.51367	-10.6062	0.176716	-10	-10	absent
AIK1	BLL1	AIK	BLL	AIK1BLL1	UY	2	-10	1.4e-08	-7.85305	-11.8508	0.176716	-10	-10	absent
AIK1	BNI1	AIK	BNI	AIK1BNI1	Glycerol	2	-10	1.94e-08	-7.71275	-11.9071	0.183947	0.0365608	-10	absent
AIK1	BNI1	AIK	BNI	AIK1BNI1	Glycerol	1	-10	7.72e-09	-8.11232	-13.2917	0.183947	0.0365608	-10	absent
AIK1	BNI1	AIK	BNI	AIK1BNI1	Glucose	1	-10	6.11e-09	-8.21366	-12.6309	0.183947	0.00753623	-10	absent
AIK1	BNI1	AIK	BNI	AIK1BNI1	Glucose	2	-10	1.32e-08	-7.87867	-9.27331	0.183947	0.00753623	-10	absent
AIK1	BNI1	AIK	BNI	AIK1BNI1	UY	1	-10	3.06e-08	-7.51367	-15.0867	0.183947	-10	-10	absent
AIK1	BNI1	AIK	BNI	AIK1BNI1	UY	2	-10	1.4e-08	-7.85305	-15.7654	0.183947	-10	-10	absent
AIK1	BQG1	AIK	BQG	AIK1BQG1	Glycerol	2	-10	1.94e-08	-7.71275	-11.2479	0.179092	0.0365608	0.0537228	absent
AIK1	BQG1	AIK	BQG	AIK1BQG1	Glycerol	1	-10	7.72e-09	-8.11232	-11.9253	0.179092	0.0365608	0.0537228	absent
AIK1	BQG1	AIK	BQG	AIK1BQG1	Glucose	1	-10	6.11e-09	-8.21366	-11.8226	0.179092	0.00753623	-0.0571925	absent
AIK1	BQG1	AIK	BQG	AIK1BQG1	Glucose	2	-10	1.32e-08	-7.87867	-8.05429	0.179092	0.00753623	-0.0571925	absent
AIK1	BQG1	AIK	BQG	AIK1BQG1	UY	1	-10	3.06e-08	-7.51367	-10.4447	0.179092	-10	-10	absent
AIK1	BQG1	AIK	BQG	AIK1BQG1	UY	2	-10	1.4e-08	-7.85305	-11.4456	0.179092	-10	-10	absent
AIK1	BNK1	AIK	BNK	AIK1BNK1	Glycerol	2	-10	1.94e-08	-7.71275	-10.954	0.163004	0.0365608	0.115878	absent
AIK1	BNK1	AIK	BNK	AIK1BNK1	Glycerol	1	-10	7.72e-09	-8.11232	-11.3037	0.163004	0.0365608	0.115878	absent
AIK1	BNK1	AIK	BNK	AIK1BNK1	Glucose	1	-10	6.11e-09	-8.21366	-11.3292	0.163004	0.00753623	-0.0796816	absent
AIK1	BNK1	AIK	BNK	AIK1BNK1	Glucose	2	-10	1.32e-08	-7.87867	-7.87106	0.163004	0.00753623	-0.0796816	absent
AIK1	BNK1	AIK	BNK	AIK1BNK1	UY	1	-10	3.06e-08	-7.51367	-10.3575	0.163004	-10	-10	absent
AIK1	BNK1	AIK	BNK	AIK1BNK1	UY	2	-10	1.4e-08	-7.85305	-11.1718	0.163004	-10	-10	absent
AIK1	BPQ1	AIK	BPQ	AIK1BPQ1	Glycerol	2	-10	1.94e-08	-7.71275	-11.0074	0.20425	0.0365608	0.0632255	absent
AIK1	BPQ1	AIK	BPQ	AIK1BPQ1	Glycerol	1	-10	7.72e-09	-8.11232	-11.1913	0.20425	0.0365608	0.0632255	absent
AIK1	BPQ1	AIK	BPQ	AIK1BPQ1	Glucose	1	0.000920234	6.11e-09	-8.21366	-11.5836	0.20425	0.00753623	0.00714221	absent
AIK1	BPQ1	AIK	BPQ	AIK1BPQ1	Glucose	2	0.000920234	1.32e-08	-7.87867	-7.93963	0.20425	0.00753623	0.00714221	absent
AIK1	BPQ1	AIK	BPQ	AIK1BPQ1	UY	1	-10	3.06e-08	-7.51367	-10.926	0.20425	-10	-10	absent
AIK1	BPQ1	AIK	BPQ	AIK1BPQ1	UY	2	-10	1.4e-08	-7.85305	-11.0168	0.20425	-10	-10	absent
AIK1	BQH1	AIK	BQH	AIK1BQH1	Glycerol	2	-10	1.94e-08	-7.71275	-15.8795	0.164596	0.0365608	-1	absent
AIK1	BQH1	AIK	BQH	AIK1BQH1	Glycerol	1	-10	7.72e-09	-8.11232	-16.6786	0.164596	0.0365608	-1	absent
AIK1	BQH1	AIK	BQH	AIK1BQH1	Glucose	1	-10	6.11e-09	-8.21366	-13.4418	0.164596	0.00753623	0.0201877	absent
AIK1	BQH1	AIK	BQH	AIK1BQH1	Glucose	2	-10	1.32e-08	-7.87867	-12.8698	0.164596	0.00753623	0.0201877	absent
AIK1	BQH1	AIK	BQH	AIK1BQH1	UY	1	-10	3.06e-08	-7.51367	-15.4813	0.164596	-10	-10	absent
AIK1	BQH1	AIK	BQH	AIK1BQH1	UY	2	-10	1.4e-08	-7.85305	-16.16	0.164596	-10	-10	absent
AIK1	BRA1	AIK	BRA	AIK1BRA1	Glycerol	2	-10	1.94e-08	-7.71275	-10.8493	0.188553	0.0365608	-1	absent
AIK1	BRA1	AIK	BRA	AIK1BRA1	Glycerol	1	-10	7.72e-09	-8.11232	-11.4128	0.188553	0.0365608	-1	absent
AIK1	BRA1	AIK	BRA	AIK1BRA1	Glucose	1	-10	6.11e-09	-8.21366	-11.5911	0.188553	0.00753623	-0.0988197	absent
AIK1	BRA1	AIK	BRA	AIK1BRA1	Glucose	2	-10	1.32e-08	-7.87867	-7.77541	0.188553	0.00753623	-0.0988197	absent
AIK1	BRA1	AIK	BRA	AIK1BRA1	UY	1	-10	3.06e-08	-7.51367	-10.8509	0.188553	-10	-10	absent
AIK1	BRA1	AIK	BRA	AIK1BRA1	UY	2	-10	1.4e-08	-7.85305	-11.5613	0.188553	-10	-10	absent
AIK1	BLN1	AIK	BLN	AIK1BLN1	Glycerol	2	-10	1.94e-08	-7.71275	-15.3657	0.171392	0.0365608	-10	absent
AIK1	BLN1	AIK	BLN	AIK1BLN1	Glycerol	1	-10	7.72e-09	-8.11232	-16.1648	0.171392	0.0365608	-10	absent
AIK1	BLN1	AIK	BLN	AIK1BLN1	Glucose	1	-10	6.11e-09	-8.21366	-12.632	0.171392	0.00753623	-10	absent
AIK1	BLN1	AIK	BLN	AIK1BLN1	Glucose	2	-10	1.32e-08	-7.87867	-8.86373	0.171392	0.00753623	-10	absent
AIK1	BLN1	AIK	BLN	AIK1BLN1	UY	1	-10	3.06e-08	-7.51367	-14.9675	0.171392	-10	-10	absent
AIK1	BLN1	AIK	BLN	AIK1BLN1	UY	2	-10	1.4e-08	-7.85305	-11.8405	0.171392	-10	-10	absent
AIK1	BQI1	AIK	BQI	AIK1BQI1	Glycerol	2	-10	1.94e-08	-7.71275	-15.5319	0.172274	0.0365608	-0.01173	absent
AIK1	BQI1	AIK	BQI	AIK1BQI1	Glycerol	1	-10	7.72e-09	-8.11232	-12.8047	0.172274	0.0365608	-0.01173	absent
AIK1	BQI1	AIK	BQI	AIK1BQI1	Glucose	1	-10	6.11e-09	-8.21366	-13.2354	0.172274	0.00753623	-0.108288	absent
AIK1	BQI1	AIK	BQI	AIK1BQI1	Glucose	2	-10	1.32e-08	-7.87867	-9.28038	0.172274	0.00753623	-0.108288	absent
AIK1	BQI1	AIK	BQI	AIK1BQI1	UY	1	-10	3.06e-08	-7.51367	-11.2313	0.172274	-10	-10	absent
AIK1	BQI1	AIK	BQI	AIK1BQI1	UY	2	-10	1.4e-08	-7.85305	-11.542	0.172274	-10	-10	absent
AIK1	BRB1	AIK	BRB	AIK1BRB1	Glycerol	2	-1	1.94e-08	-7.71275	-11.2808	0.264748	0.0365608	0.000627839	absent
AIK1	BRB1	AIK	BRB	AIK1BRB1	Glycerol	1	-1	7.72e-09	-8.11232	-12.1065	0.264748	0.0365608	0.000627839	absent
AIK1	BRB1	AIK	BRB	AIK1BRB1	Glucose	1	0.00571154	6.11e-09	-8.21366	-10.9537	0.264748	0.00753623	0.0350566	absent
AIK1	BRB1	AIK	BRB	AIK1BRB1	Glucose	2	0.00571154	1.32e-08	-7.87867	-7.23512	0.264748	0.00753623	0.0350566	absent
AIK1	BRB1	AIK	BRB	AIK1BRB1	UY	1	-10	3.06e-08	-7.51367	-10.4709	0.264748	-10	-10	absent
AIK1	BRB1	AIK	BRB	AIK1BRB1	UY	2	-10	1.4e-08	-7.85305	-11.4541	0.264748	-10	-10	absent
AIK1	BLP1	AIK	BLP	AIK1BLP1	Glycerol	2	-10	1.94e-08	-7.71275	-15.4485	0.171711	0.0365608	0.0191829	absent
AIK1	BLP1	AIK	BLP	AIK1BLP1	Glycerol	1	-10	7.72e-09	-8.11232	-12.5257	0.171711	0.0365608	0.0191829	absent
AIK1	BLP1	AIK	BLP	AIK1BLP1	Glucose	1	-10	6.11e-09	-8.21366	-16.4503	0.171711	0.00753623	0.0477277	absent
AIK1	BLP1	AIK	BLP	AIK1BLP1	Glucose	2	-10	1.32e-08	-7.87867	-12.4388	0.171711	0.00753623	0.0477277	absent
AIK1	BLP1	AIK	BLP	AIK1BLP1	UY	1	-10	3.06e-08	-7.51367	-15.0503	0.171711	-10	-10	absent
AIK1	BLP1	AIK	BLP	AIK1BLP1	UY	2	-10	1.4e-08	-7.85305	-15.7291	0.171711	-10	-10	absent
AIK1	BRC1	AIK	BRC	AIK1BRC1	Glycerol	2	-10	1.94e-08	-7.71275	-10.9146	0.1859	0.0365608	-0.0845599	absent
AIK1	BRC1	AIK	BRC	AIK1BRC1	Glycerol	1	-10	7.72e-09	-8.11232	-11.1222	0.1859	0.0365608	-0.0845599	absent
AIK1	BRC1	AIK	BRC	AIK1BRC1	Glucose	1	0.0450167	6.11e-09	-8.21366	-11.1178	0.1859	0.00753623	-0.0843597	absent
AIK1	BRC1	AIK	BRC	AIK1BRC1	Glucose	2	0.0450167	1.32e-08	-7.87867	-7.56748	0.1859	0.00753623	-0.0843597	absent
AIK1	BRC1	AIK	BRC	AIK1BRC1	UY	1	-10	3.06e-08	-7.51367	-11.5697	0.1859	-10	-10	absent
AIK1	BRC1	AIK	BRC	AIK1BRC1	UY	2	-10	1.4e-08	-7.85305	-11.1483	0.1859	-10	-10	absent
AIK1	BPT1	AIK	BPT	AIK1BPT1	Glycerol	2	-10	1.94e-08	-7.71275	-11.4324	0.17626	0.0365608	0.0527905	absent
AIK1	BPT1	AIK	BPT	AIK1BPT1	Glycerol	1	-10	7.72e-09	-8.11232	-11.5145	0.17626	0.0365608	0.0527905	absent
AIK1	BPT1	AIK	BPT	AIK1BPT1	Glucose	1	-10	6.11e-09	-8.21366	-11.9068	0.17626	0.00753623	-0.0226414	absent
AIK1	BPT1	AIK	BPT	AIK1BPT1	Glucose	2	-10	1.32e-08	-7.87867	-8.29971	0.17626	0.00753623	-0.0226414	absent
AIK1	BPT1	AIK	BPT	AIK1BPT1	UY	1	-10	3.06e-08	-7.51367	-10.8442	0.17626	-10	-10	absent
AIK1	BPT1	AIK	BPT	AIK1BPT1	UY	2	-10	1.4e-08	-7.85305	-11.4261	0.17626	-10	-10	absent
AIK1	BRD1	AIK	BRD	AIK1BRD1	Glycerol	2	-10	1.94e-08	-7.71275	-15.4124	0.165237	0.0365608	0.10436	absent
AIK1	BRD1	AIK	BRD	AIK1BRD1	Glycerol	1	-10	7.72e-09	-8.11232	-12.3674	0.165237	0.0365608	0.10436	absent
AIK1	BRD1	AIK	BRD	AIK1BRD1	Glucose	1	-0.0243247	6.11e-09	-8.21366	-11.5042	0.165237	0.00753623	-0.0248454	absent
AIK1	BRD1	AIK	BRD	AIK1BRD1	Glucose	2	-0.0243247	1.32e-08	-7.87867	-7.83044	0.165237	0.00753623	-0.0248454	absent
AIK1	BRD1	AIK	BRD	AIK1BRD1	UY	1	-10	3.06e-08	-7.51367	-11.3217	0.165237	-10	-10	absent
AIK1	BRD1	AIK	BRD	AIK1BRD1	UY	2	-10	1.4e-08	-7.85305	-12.007	0.165237	-10	-10	absent
AIK1	BMK1	AIK	BMK	AIK1BMK1	Glycerol	2	-10	1.94e-08	-7.71275	-11.9755	0.164882	0.0365608	0.0727937	absent
AIK1	BMK1	AIK	BMK	AIK1BMK1	Glycerol	1	-10	7.72e-09	-8.11232	-15.9501	0.164882	0.0365608	0.0727937	absent
AIK1	BMK1	AIK	BMK	AIK1BMK1	Glucose	1	-10	6.11e-09	-8.21366	-11.4442	0.164882	0.00753623	0.0206207	absent
AIK1	BMK1	AIK	BMK	AIK1BMK1	Glucose	2	-10	1.32e-08	-7.87867	-7.81713	0.164882	0.00753623	0.0206207	absent
AIK1	BMK1	AIK	BMK	AIK1BMK1	UY	1	-10	3.06e-08	-7.51367	-10.7137	0.164882	-10	-10	absent
AIK1	BMK1	AIK	BMK	AIK1BMK1	UY	2	-10	1.4e-08	-7.85305	-12.0485	0.164882	-10	-10	absent
AIK1	BQP1	AIK	BQP	AIK1BQP1	Glycerol	2	-10	1.94e-08	-7.71275	-15.2859	0.22065	0.0365608	-0.0301991	absent
AIK1	BQP1	AIK	BQP	AIK1BQP1	Glycerol	1	-10	7.72e-09	-8.11232	-12.1889	0.22065	0.0365608	-0.0301991	absent
AIK1	BQP1	AIK	BQP	AIK1BQP1	Glucose	1	-1	6.11e-09	-8.21366	-11.391	0.22065	0.00753623	0.0119541	absent
AIK1	BQP1	AIK	BQP	AIK1BQP1	Glucose	2	-1	1.32e-08	-7.87867	-7.56727	0.22065	0.00753623	0.0119541	absent
AIK1	BQP1	AIK	BQP	AIK1BQP1	UY	1	-10	3.06e-08	-7.51367	-11.1826	0.22065	-10	-10	absent
AIK1	BQP1	AIK	BQP	AIK1BQP1	UY	2	-10	1.4e-08	-7.85305	-15.5665	0.22065	-10	-10	absent
AIK1	BLV1	AIK	BLV	AIK1BLV1	Glycerol	2	-10	1.94e-08	-7.71275	-11.7516	0.178995	0.0365608	0.0838921	absent
AIK1	BLV1	AIK	BLV	AIK1BLV1	Glycerol	1	-10	7.72e-09	-8.11232	-12.8835	0.178995	0.0365608	0.0838921	absent
AIK1	BLV1	AIK	BLV	AIK1BLV1	Glucose	1	-10	6.11e-09	-8.21366	-12.9089	0.178995	0.00753623	-0.0681483	absent
AIK1	BLV1	AIK	BLV	AIK1BLV1	Glucose	2	-10	1.32e-08	-7.87867	-8.73623	0.178995	0.00753623	-0.0681483	absent
AIK1	BLV1	AIK	BLV	AIK1BLV1	UY	1	-10	3.06e-08	-7.51367	-14.9706	0.178995	-10	-10	absent
AIK1	BLV1	AIK	BLV	AIK1BLV1	UY	2	-10	1.4e-08	-7.85305	-15.6494	0.178995	-10	-10	absent
AIK1	BQQ1	AIK	BQQ	AIK1BQQ1	Glycerol	2	-10	1.94e-08	-7.71275	-15.857	0.179141	0.0365608	0.0824425	absent
AIK1	BQQ1	AIK	BQQ	AIK1BQQ1	Glycerol	1	-10	7.72e-09	-8.11232	-16.6561	0.179141	0.0365608	0.0824425	absent
AIK1	BQQ1	AIK	BQQ	AIK1BQQ1	Glucose	1	-10	6.11e-09	-8.21366	-13.4073	0.179141	0.00753623	0.0291802	absent
AIK1	BQQ1	AIK	BQQ	AIK1BQQ1	Glucose	2	-10	1.32e-08	-7.87867	-12.8473	0.179141	0.00753623	0.0291802	absent
AIK1	BQQ1	AIK	BQQ	AIK1BQQ1	UY	1	-10	3.06e-08	-7.51367	-15.4588	0.179141	-10	-10	absent
AIK1	BQQ1	AIK	BQQ	AIK1BQQ1	UY	2	-10	1.4e-08	-7.85305	-16.1376	0.179141	-10	-10	absent
AIK1	BMA1	AIK	BMA	AIK1BMA1	Glycerol	2	0.0135041	1.94e-08	-7.71275	-11.6189	1.56527	0.0365608	0.0885346	absent
AIK1	BMA1	AIK	BMA	AIK1BMA1	Glycerol	1	0.0135041	7.72e-09	-8.11232	-16.1155	1.56527	0.0365608	0.0885346	absent
AIK1	BMA1	AIK	BMA	AIK1BMA1	Glucose	1	-10	6.11e-09	-8.21366	-11.9558	1.56527	0.00753623	0.0277247	absent
AIK1	BMA1	AIK	BMA	AIK1BMA1	Glucose	2	-10	0.00150874	-2.82138	-8.30544	1.56527	0.00753623	0.0277247	over_represented
AIK1	BMA1	AIK	BMA	AIK1BMA1	UY	1	-10	3.06e-08	-7.51367	-14.9182	1.56527	-10	-10	absent
AIK1	BMA1	AIK	BMA	AIK1BMA1	UY	2	-10	1.4e-08	-7.85305	-11.582	1.56527	-10	-10	absent
AIK1	BQR1	AIK	BQR	AIK1BQR1	Glycerol	2	-10	1.94e-08	-7.71275	-11.3779	0.171928	0.0365608	0.0588489	absent
AIK1	BQR1	AIK	BQR	AIK1BQR1	Glycerol	1	-10	7.72e-09	-8.11232	-11.9614	0.171928	0.0365608	0.0588489	absent
AIK1	BQR1	AIK	BQR	AIK1BQR1	Glucose	1	-10	6.11e-09	-8.21366	-12.6904	0.171928	0.00753623	-0.0545715	absent
AIK1	BQR1	AIK	BQR	AIK1BQR1	Glucose	2	-10	1.32e-08	-7.87867	-8.24467	0.171928	0.00753623	-0.0545715	absent
AIK1	BQR1	AIK	BQR	AIK1BQR1	UY	1	-10	3.06e-08	-7.51367	-10.8306	0.171928	-10	-10	absent
AIK1	BQR1	AIK	BQR	AIK1BQR1	UY	2	-10	1.4e-08	-7.85305	-11.4568	0.171928	-10	-10	absent
AIK1	CAD1	AIK	CAD	AIK1CAD1	Glycerol	2	-10	1.94e-08	-7.71275	-15.0353	0.323557	0.0365608	-10	absent
AIK1	CAD1	AIK	CAD	AIK1CAD1	Glycerol	1	-10	7.72e-09	-8.11232	-15.8344	0.323557	0.0365608	-10	absent
AIK1	CAD1	AIK	CAD	AIK1CAD1	Glucose	1	-10	6.11e-09	-8.21366	-16.0371	0.323557	0.00753623	-0.0194773	absent
AIK1	CAD1	AIK	CAD	AIK1CAD1	Glucose	2	-10	1.32e-08	-7.87867	-12.0257	0.323557	0.00753623	-0.0194773	absent
AIK1	CAD1	AIK	CAD	AIK1CAD1	UY	1	-10	3.06e-08	-7.51367	-14.6371	0.323557	-10	-10	absent
AIK1	CAD1	AIK	CAD	AIK1CAD1	UY	2	-10	1.4e-08	-7.85305	-15.3159	0.323557	-10	-10	absent
AIK1	BSB1	AIK	BSB	AIK1BSB1	Glycerol	2	-10	1.94e-08	-7.71275	-16.3018	0.16201	0.0365608	-10	absent
AIK1	BSB1	AIK	BSB	AIK1BSB1	Glycerol	1	-10	7.72e-09	-8.11232	-17.101	0.16201	0.0365608	-10	absent
AIK1	BSB1	AIK	BSB	AIK1BSB1	Glucose	1	-10	6.11e-09	-8.21366	-13.0838	0.16201	0.00753623	-10	absent
AIK1	BSB1	AIK	BSB	AIK1BSB1	Glucose	2	-10	1.32e-08	-7.87867	-10.2182	0.16201	0.00753623	-10	absent
AIK1	BSB1	AIK	BSB	AIK1BSB1	UY	1	-10	3.06e-08	-7.51367	-15.9037	0.16201	-10	-10	absent
AIK1	BSB1	AIK	BSB	AIK1BSB1	UY	2	-10	1.4e-08	-7.85305	-16.5824	0.16201	-10	-10	absent
AIK1	BTH1	AIK	BTH	AIK1BTH1	Glycerol	2	-10	1.94e-08	-7.71275	-10.3842	0.168961	0.0365608	-1	absent
AIK1	BTH1	AIK	BTH	AIK1BTH1	Glycerol	1	-10	7.72e-09	-8.11232	-10.6533	0.168961	0.0365608	-1	absent
AIK1	BTH1	AIK	BTH	AIK1BTH1	Glucose	1	-10	6.11e-09	-8.21366	-11.4268	0.168961	0.00753623	-0.01391	absent
AIK1	BTH1	AIK	BTH	AIK1BTH1	Glucose	2	-10	1.32e-08	-7.87867	-7.72862	0.168961	0.00753623	-0.01391	absent
AIK1	BTH1	AIK	BTH	AIK1BTH1	UY	1	-10	3.06e-08	-7.51367	-10.8586	0.168961	-10	-10	absent
AIK1	BTH1	AIK	BTH	AIK1BTH1	UY	2	-10	1.4e-08	-7.85305	-10.3968	0.168961	-10	-10	absent
AIK1	AHP1	AIK	AHP	AIK1AHP1	Glycerol	2	-10	1.94e-08	-7.71275	-15.3468	0.332333	0.0365608	0.0888156	absent
AIK1	AHP1	AIK	AHP	AIK1AHP1	Glycerol	1	-10	7.72e-09	-8.11232	-16.1459	0.332333	0.0365608	0.0888156	absent
AIK1	AHP1	AIK	AHP	AIK1AHP1	Glucose	1	-10	6.11e-09	-8.21366	-16.3486	0.332333	0.00753623	-1	absent
AIK1	AHP1	AIK	AHP	AIK1AHP1	Glucose	2	-10	1.32e-08	-7.87867	-12.3372	0.332333	0.00753623	-1	absent
AIK1	AHP1	AIK	AHP	AIK1AHP1	UY	1	-10	3.06e-08	-7.51367	-14.9486	0.332333	-10	-10	absent
AIK1	AHP1	AIK	AHP	AIK1AHP1	UY	2	-10	1.4e-08	-7.85305	-15.6274	0.332333	-10	-10	absent
AIK1	CQD1	AIK	CQD	AIK1CQD1	Glycerol	2	-10	1.94e-08	-7.71275	-12.0469	0.767248	0.0365608	-10	absent
AIK1	CQD1	AIK	CQD	AIK1CQD1	Glycerol	1	-10	7.72e-09	-8.11232	-12.3847	0.767248	0.0365608	-10	absent
AIK1	CQD1	AIK	CQD	AIK1CQD1	Glucose	1	-10	6.11e-09	-8.21366	-12.4509	0.767248	0.00753623	0.0106465	absent
AIK1	CQD1	AIK	CQD	AIK1CQD1	Glucose	2	-10	1.32e-08	-7.87867	-8.52474	0.767248	0.00753623	0.0106465	absent
AIK1	CQD1	AIK	CQD	AIK1CQD1	UY	1	-10	3.06e-08	-7.51367	-15.2246	0.767248	-10	-10	absent
AIK1	CQD1	AIK	CQD	AIK1CQD1	UY	2	-10	1.4e-08	-7.85305	-15.9034	0.767248	-10	-10	absent
AIK1	APV1	AIK	APV	AIK1APV1	Glycerol	2	-10	1.94e-08	-7.71275	-10.6846	0.168304	0.0365608	0.176787	absent
AIK1	APV1	AIK	APV	AIK1APV1	Glycerol	1	-10	7.72e-09	-8.11232	-11.117	0.168304	0.0365608	0.176787	absent
AIK1	APV1	AIK	APV	AIK1APV1	Glucose	1	-10	6.11e-09	-8.21366	-11.9098	0.168304	0.00753623	-0.0613302	absent
AIK1	APV1	AIK	APV	AIK1APV1	Glucose	2	-10	1.32e-08	-7.87867	-8.04814	0.168304	0.00753623	-0.0613302	absent
AIK1	APV1	AIK	APV	AIK1APV1	UY	1	-10	3.06e-08	-7.51367	-10.4358	0.168304	-10	-10	absent
AIK1	APV1	AIK	APV	AIK1APV1	UY	2	-10	1.4e-08	-7.85305	-11.1972	0.168304	-10	-10	absent
AIK1	AST1	AIK	AST	AIK1AST1	Glycerol	2	-10	1.94e-08	-7.71275	-10.9575	0.308228	0.0365608	-1	absent
AIK1	AST1	AIK	AST	AIK1AST1	Glycerol	1	-10	7.72e-09	-8.11232	-11.3682	0.308228	0.0365608	-1	absent
AIK1	AST1	AIK	AST	AIK1AST1	Glucose	1	-0.0368593	6.11e-09	-8.21366	-11.8436	0.308228	0.00753623	0.0143308	absent
AIK1	AST1	AIK	AST	AIK1AST1	Glucose	2	-0.0368593	1.32e-08	-7.87867	-8.19308	0.308228	0.00753623	0.0143308	absent
AIK1	AST1	AIK	AST	AIK1AST1	UY	1	-10	3.06e-08	-7.51367	-11.2698	0.308228	-10	-10	absent
AIK1	AST1	AIK	AST	AIK1AST1	UY	2	-10	1.4e-08	-7.85305	-10.9761	0.308228	-10	-10	absent
AIK1	CCV1	AIK	CCV	AIK1CCV1	Glycerol	2	-10	1.94e-08	-7.71275	-10.8	1.45836	0.0365608	-1	absent
AIK1	CCV1	AIK	CCV	AIK1CCV1	Glycerol	1	-10	7.72e-09	-8.11232	-11.5153	1.45836	0.0365608	-1	absent
AIK1	CCV1	AIK	CCV	AIK1CCV1	Glucose	1	-0.102687	6.11e-09	-8.21366	-11.9569	1.45836	0.00753623	0.044604	absent
AIK1	CCV1	AIK	CCV	AIK1CCV1	Glucose	2	-0.102687	1.32e-08	-7.87867	-7.91932	1.45836	0.00753623	0.044604	absent
AIK1	CCV1	AIK	CCV	AIK1CCV1	UY	1	-10	3.06e-08	-7.51367	-11.2041	1.45836	-10	-10	absent
AIK1	CCV1	AIK	CCV	AIK1CCV1	UY	2	-10	1.4e-08	-7.85305	-10.905	1.45836	-10	-10	absent
AIK1	YAR1	AIK	YAR	AIK1YAR1	Glycerol	2	-10	1.94e-08	-7.71275	-15.5847	0.806216	0.0365608	-1	absent
AIK1	YAR1	AIK	YAR	AIK1YAR1	Glycerol	1	-10	7.72e-09	-8.11232	-16.3839	0.806216	0.0365608	-1	absent
AIK1	YAR1	AIK	YAR	AIK1YAR1	Glucose	1	-10	6.11e-09	-8.21366	-12.3397	0.806216	0.00753623	-0.0705407	absent
AIK1	YAR1	AIK	YAR	AIK1YAR1	Glucose	2	-10	1.32e-08	-7.87867	-8.72094	0.806216	0.00753623	-0.0705407	absent
AIK1	YAR1	AIK	YAR	AIK1YAR1	UY	1	-10	3.06e-08	-7.51367	-11.528	0.806216	-10	-10	absent
AIK1	YAR1	AIK	YAR	AIK1YAR1	UY	2	-10	1.4e-08	-7.85305	-15.8653	0.806216	-10	-10	absent
AIK1	YBU1	AIK	YBU	AIK1YBU1	Glycerol	2	-10	1.94e-08	-7.71275	-10.8625	1.07908	0.0365608	-1	absent
AIK1	YBU1	AIK	YBU	AIK1YBU1	Glycerol	1	-10	7.72e-09	-8.11232	-11.4149	1.07908	0.0365608	-1	absent
AIK1	YBU1	AIK	YBU	AIK1YBU1	Glucose	1	-10	6.11e-09	-8.21366	-16.3589	1.07908	0.00753623	-10	absent
AIK1	YBU1	AIK	YBU	AIK1YBU1	Glucose	2	-10	1.32e-08	-7.87867	-12.3475	1.07908	0.00753623	-10	absent
AIK1	YBU1	AIK	YBU	AIK1YBU1	UY	1	-10	3.06e-08	-7.51367	-14.9589	1.07908	-10	-10	absent
AIK1	YBU1	AIK	YBU	AIK1YBU1	UY	2	-10	1.4e-08	-7.85305	-11.0028	1.07908	-10	-10	absent
ALH1	AKB1	ALH	AKB	ALH1AKB1	Glycerol	2	-10	1.94e-08	-7.71275	-11.7794	1.26425	-1	-1	absent
ALH1	AKB1	ALH	AKB	ALH1AKB1	Glycerol	1	-10	7.72e-09	-8.11232	-12.0704	1.26425	-1	-1	absent
ALH1	AKB1	ALH	AKB	ALH1AKB1	Glucose	1	-0.0887625	6.11e-09	-8.21366	-8.42453	1.26425	-0.0834986	-0.0154866	absent
ALH1	AKB1	ALH	AKB	ALH1AKB1	Glucose	2	-0.0887625	1.32e-08	-7.87867	-12.3365	1.26425	-0.0834986	-0.0154866	absent
ALH1	AKB1	ALH	AKB	ALH1AKB1	UY	1	-10	3.06e-08	-7.51367	-11.4259	1.26425	-10	-10	absent
ALH1	AKB1	ALH	AKB	ALH1AKB1	UY	2	-10	1.4e-08	-7.85305	-12.0007	1.26425	-10	-10	absent
ALH1	AKP1	ALH	AKP	ALH1AKP1	Glycerol	2	-10	1.94e-08	-7.71275	-10.8222	1.45994	-1	-0.109008	absent
ALH1	AKP1	ALH	AKP	ALH1AKP1	Glycerol	1	-10	7.72e-09	-8.11232	-11.4958	1.45994	-1	-0.109008	absent
ALH1	AKP1	ALH	AKP	ALH1AKP1	Glucose	1	0.0161278	6.11e-09	-8.21366	-7.282	1.45994	-0.0834986	-0.0557565	absent
ALH1	AKP1	ALH	AKP	ALH1AKP1	Glucose	2	0.0161278	1.32e-08	-7.87867	-11.2216	1.45994	-0.0834986	-0.0557565	absent
ALH1	AKP1	ALH	AKP	ALH1AKP1	UY	1	-10	3.06e-08	-7.51367	-10.6923	1.45994	-10	-10	absent
ALH1	AKP1	ALH	AKP	ALH1AKP1	UY	2	-10	1.4e-08	-7.85305	-10.964	1.45994	-10	-10	absent
ALH1	ALG1	ALH	ALG	ALH1ALG1	Glycerol	2	-10	1.94e-08	-7.71275	-15.5303	1.19978	-1	-0.0464457	absent
ALH1	ALG1	ALH	ALG	ALH1ALG1	Glycerol	1	-10	7.72e-09	-8.11232	-16.3294	1.19978	-1	-0.0464457	absent
ALH1	ALG1	ALH	ALG	ALH1ALG1	Glucose	1	-10	6.11e-09	-8.21366	-12.5459	1.19978	-0.0834986	-0.141619	absent
ALH1	ALG1	ALH	ALG	ALH1ALG1	Glucose	2	-10	1.32e-08	-7.87867	-15.8621	1.19978	-0.0834986	-0.141619	absent
ALH1	ALG1	ALH	ALG	ALH1ALG1	UY	1	-10	3.06e-08	-7.51367	-15.1321	1.19978	-10	-10	absent
ALH1	ALG1	ALH	ALG	ALH1ALG1	UY	2	-10	1.4e-08	-7.85305	-15.8109	1.19978	-10	-10	absent
ALH1	ANG1	ALH	ANG	ALH1ANG1	Glycerol	2	-10	1.94e-08	-7.71275	-15.9119	0.900154	-1	-1	absent
ALH1	ANG1	ALH	ANG	ALH1ANG1	Glycerol	1	-10	7.72e-09	-8.11232	-16.711	0.900154	-1	-1	absent
ALH1	ANG1	ALH	ANG	ALH1ANG1	Glucose	1	-10	6.11e-09	-8.21366	-12.9275	0.900154	-0.0834986	0.0663533	absent
ALH1	ANG1	ALH	ANG	ALH1ANG1	Glucose	2	-10	1.32e-08	-7.87867	-16.2437	0.900154	-0.0834986	0.0663533	absent
ALH1	ANG1	ALH	ANG	ALH1ANG1	UY	1	-10	3.06e-08	-7.51367	-15.5137	0.900154	-10	-10	absent
ALH1	ANG1	ALH	ANG	ALH1ANG1	UY	2	-10	1.4e-08	-7.85305	-16.1925	0.900154	-10	-10	absent
ALH1	AIM1	ALH	AIM	ALH1AIM1	Glycerol	2	-10	1.94e-08	-7.71275	-15.6975	1.48513	-1	-10	absent
ALH1	AIM1	ALH	AIM	ALH1AIM1	Glycerol	1	-10	7.72e-09	-8.11232	-16.4967	1.48513	-1	-10	absent
ALH1	AIM1	ALH	AIM	ALH1AIM1	Glucose	1	-10	6.11e-09	-8.21366	-12.7132	1.48513	-0.0834986	-10	absent
ALH1	AIM1	ALH	AIM	ALH1AIM1	Glucose	2	-10	1.32e-08	-7.87867	-16.0293	1.48513	-0.0834986	-10	absent
ALH1	AIM1	ALH	AIM	ALH1AIM1	UY	1	-10	3.06e-08	-7.51367	-15.2994	1.48513	-10	-10	absent
ALH1	AIM1	ALH	AIM	ALH1AIM1	UY	2	-10	1.4e-08	-7.85305	-15.9781	1.48513	-10	-10	absent
ALH1	AKV1	ALH	AKV	ALH1AKV1	Glycerol	2	-1	1.94e-08	-7.71275	-10.5888	1.45981	-1	-0.0735332	absent
ALH1	AKV1	ALH	AKV	ALH1AKV1	Glycerol	1	-1	7.72e-09	-8.11232	-11.3771	1.45981	-1	-0.0735332	absent
ALH1	AKV1	ALH	AKV	ALH1AKV1	Glucose	1	0.0219235	6.11e-09	-8.21366	-7.24952	1.45981	-0.0834986	-0.033945	absent
ALH1	AKV1	ALH	AKV	ALH1AKV1	Glucose	2	0.0219235	1.32e-08	-7.87867	-10.8424	1.45981	-0.0834986	-0.033945	absent
ALH1	AKV1	ALH	AKV	ALH1AKV1	UY	1	-10	3.06e-08	-7.51367	-10.5612	1.45981	-10	-10	absent
ALH1	AKV1	ALH	AKV	ALH1AKV1	UY	2	-10	1.4e-08	-7.85305	-11.1504	1.45981	-10	-10	absent
ALH1	BBI1	ALH	BBI	ALH1BBI1	Glycerol	2	-10	1.94e-08	-7.71275	-14.9003	1.46134	-1	-0.0628554	absent
ALH1	BBI1	ALH	BBI	ALH1BBI1	Glycerol	1	-10	7.72e-09	-8.11232	-15.6995	1.46134	-1	-0.0628554	absent
ALH1	BBI1	ALH	BBI	ALH1BBI1	Glucose	1	-10	6.11e-09	-8.21366	-10.1447	1.46134	-0.0834986	0.0118567	absent
ALH1	BBI1	ALH	BBI	ALH1BBI1	Glucose	2	-10	1.32e-08	-7.87867	-15.2321	1.46134	-0.0834986	0.0118567	absent
ALH1	BBI1	ALH	BBI	ALH1BBI1	UY	1	-10	3.06e-08	-7.51367	-14.5022	1.46134	-10	-10	absent
ALH1	BBI1	ALH	BBI	ALH1BBI1	UY	2	-10	1.4e-08	-7.85305	-15.1809	1.46134	-10	-10	absent
ALH1	BAK1	ALH	BAK	ALH1BAK1	Glycerol	2	0.0597822	1.94e-08	-7.71275	-15.4493	1.33566	-1	-0.00177197	absent
ALH1	BAK1	ALH	BAK	ALH1BAK1	Glycerol	1	0.0597822	7.72e-09	-8.11232	-12.8512	1.33566	-1	-0.00177197	absent
ALH1	BAK1	ALH	BAK	ALH1BAK1	Glucose	1	0.0744226	6.11e-09	-8.21366	-8.40926	1.33566	-0.0834986	0.0639478	absent
ALH1	BAK1	ALH	BAK	ALH1BAK1	Glucose	2	0.0744226	1.32e-08	-7.87867	-12.1177	1.33566	-0.0834986	0.0639478	absent
ALH1	BAK1	ALH	BAK	ALH1BAK1	UY	1	-10	3.06e-08	-7.51367	-11.4615	1.33566	-10	-10	absent
ALH1	BAK1	ALH	BAK	ALH1BAK1	UY	2	-10	1.4e-08	-7.85305	-11.6955	1.33566	-10	-10	absent
ALH1	BEH1	ALH	BEH	ALH1BEH1	Glycerol	2	-10	1.94e-08	-7.71275	-15.1323	0.375246	-1	-1	absent
ALH1	BEH1	ALH	BEH	ALH1BEH1	Glycerol	1	-10	7.72e-09	-8.11232	-15.9315	0.375246	-1	-1	absent
ALH1	BEH1	ALH	BEH	ALH1BEH1	Glucose	1	-10	6.11e-09	-8.21366	-12.148	0.375246	-0.0834986	-0.0314472	absent
ALH1	BEH1	ALH	BEH	ALH1BEH1	Glucose	2	-10	1.32e-08	-7.87867	-15.4642	0.375246	-0.0834986	-0.0314472	absent
ALH1	BEH1	ALH	BEH	ALH1BEH1	UY	1	-10	3.06e-08	-7.51367	-14.7342	0.375246	-10	-10	absent
ALH1	BEH1	ALH	BEH	ALH1BEH1	UY	2	-10	1.4e-08	-7.85305	-15.4129	0.375246	-10	-10	absent
ALH1	BLA1	ALH	BLA	ALH1BLA1	Glycerol	2	-10	1.94e-08	-7.71275	-12.1054	1.46593	-1	-10	absent
ALH1	BLA1	ALH	BLA	ALH1BLA1	Glycerol	1	-10	7.72e-09	-8.11232	-16.0489	1.46593	-1	-10	absent
ALH1	BLA1	ALH	BLA	ALH1BLA1	Glucose	1	-0.106392	6.11e-09	-8.21366	-8.04354	1.46593	-0.0834986	-10	absent
ALH1	BLA1	ALH	BLA	ALH1BLA1	Glucose	2	-0.106392	1.32e-08	-7.87867	-15.5816	1.46593	-0.0834986	-10	absent
ALH1	BLA1	ALH	BLA	ALH1BLA1	UY	1	-10	3.06e-08	-7.51367	-13.1458	1.46593	-10	-10	absent
ALH1	BLA1	ALH	BLA	ALH1BLA1	UY	2	-10	1.4e-08	-7.85305	-11.8979	1.46593	-10	-10	absent
ALH1	BHM1	ALH	BHM	ALH1BHM1	Glycerol	2	-10	1.94e-08	-7.71275	-15.5141	1.4186	-1	-1	absent
ALH1	BHM1	ALH	BHM	ALH1BHM1	Glycerol	1	-10	7.72e-09	-8.11232	-16.3133	1.4186	-1	-1	absent
ALH1	BHM1	ALH	BHM	ALH1BHM1	Glucose	1	-10	6.11e-09	-8.21366	-12.5298	1.4186	-0.0834986	-10	absent
ALH1	BHM1	ALH	BHM	ALH1BHM1	Glucose	2	-10	1.32e-08	-7.87867	-15.846	1.4186	-0.0834986	-10	absent
ALH1	BHM1	ALH	BHM	ALH1BHM1	UY	1	-10	3.06e-08	-7.51367	-15.116	1.4186	-10	-10	absent
ALH1	BHM1	ALH	BHM	ALH1BHM1	UY	2	-10	1.4e-08	-7.85305	-15.7947	1.4186	-10	-10	absent
ALH1	BHN1	ALH	BHN	ALH1BHN1	Glycerol	2	-10	1.94e-08	-7.71275	-11.4797	1.45504	-1	-1	absent
ALH1	BHN1	ALH	BHN	ALH1BHN1	Glycerol	1	-10	7.72e-09	-8.11232	-11.8177	1.45504	-1	-1	absent
ALH1	BHN1	ALH	BHN	ALH1BHN1	Glucose	1	0.0225444	6.11e-09	-8.21366	-7.6547	1.45504	-0.0834986	-1	absent
ALH1	BHN1	ALH	BHN	ALH1BHN1	Glucose	2	0.0225444	1.32e-08	-7.87867	-11.1608	1.45504	-0.0834986	-1	absent
ALH1	BHN1	ALH	BHN	ALH1BHN1	UY	1	-10	3.06e-08	-7.51367	-10.9695	1.45504	-10	-10	absent
ALH1	BHN1	ALH	BHN	ALH1BHN1	UY	2	-10	1.4e-08	-7.85305	-11.8727	1.45504	-10	-10	absent
ALH1	BHB1	ALH	BHB	ALH1BHB1	Glycerol	2	-1	1.94e-08	-7.71275	-11.3144	1.45877	-1	-10	absent
ALH1	BHB1	ALH	BHB	ALH1BHB1	Glycerol	1	-1	7.72e-09	-8.11232	-11.7958	1.45877	-1	-10	absent
ALH1	BHB1	ALH	BHB	ALH1BHB1	Glucose	1	-0.0581138	0.00147158	-2.83222	-6.97001	1.45877	-0.0834986	-10	over_represented
ALH1	BHB1	ALH	BHB	ALH1BHB1	Glucose	2	-0.0581138	1.32e-08	-7.87867	-10.7245	1.45877	-0.0834986	-10	absent
ALH1	BHB1	ALH	BHB	ALH1BHB1	UY	1	-10	3.06e-08	-7.51367	-10.3548	1.45877	-10	-10	absent
ALH1	BHB1	ALH	BHB	ALH1BHB1	UY	2	-10	1.4e-08	-7.85305	-12.1974	1.45877	-10	-10	absent
ALH1	BLE1	ALH	BLE	ALH1BLE1	Glycerol	2	-10	1.94e-08	-7.71275	-10.6238	1.46536	-1	-0.044381	absent
ALH1	BLE1	ALH	BLE	ALH1BLE1	Glycerol	1	-10	7.72e-09	-8.11232	-10.957	1.46536	-1	-0.044381	absent
ALH1	BLE1	ALH	BLE	ALH1BLE1	Glucose	1	-0.0820048	8.56e-07	-6.06753	-7.51184	1.46536	-0.0834986	-0.0748489	as_expected
ALH1	BLE1	ALH	BLE	ALH1BLE1	Glucose	2	-0.0820048	1.32e-08	-7.87867	-11.1712	1.46536	-0.0834986	-0.0748489	absent
ALH1	BLE1	ALH	BLE	ALH1BLE1	UY	1	-10	3.06e-08	-7.51367	-10.7005	1.46536	-10	-10	absent
ALH1	BLE1	ALH	BLE	ALH1BLE1	UY	2	-10	1.4e-08	-7.85305	-10.868	1.46536	-10	-10	absent
ALH1	BHF1	ALH	BHF	ALH1BHF1	Glycerol	2	-0.0482282	1.94e-08	-7.71275	-12.1559	1.45532	-1	0.0945635	absent
ALH1	BHF1	ALH	BHF	ALH1BHF1	Glycerol	1	-0.0482282	7.72e-09	-8.11232	-16.1433	1.45532	-1	0.0945635	absent
ALH1	BHF1	ALH	BHF	ALH1BHF1	Glucose	1	-0.0322834	6.11e-09	-8.21366	-7.84691	1.45532	-0.0834986	0.0612509	absent
ALH1	BHF1	ALH	BHF	ALH1BHF1	Glucose	2	-0.0322834	1.32e-08	-7.87867	-11.7998	1.45532	-0.0834986	0.0612509	absent
ALH1	BHF1	ALH	BHF	ALH1BHF1	UY	1	-10	3.06e-08	-7.51367	-10.8312	1.45532	-10	-10	absent
ALH1	BHF1	ALH	BHF	ALH1BHF1	UY	2	-10	1.4e-08	-7.85305	-15.6248	1.45532	-10	-10	absent
ALH1	BKR1	ALH	BKR	ALH1BKR1	Glycerol	2	-10	1.94e-08	-7.71275	-11.5687	1.46447	-1	-1	absent
ALH1	BKR1	ALH	BKR	ALH1BKR1	Glycerol	1	-10	7.72e-09	-8.11232	-11.8075	1.46447	-1	-1	absent
ALH1	BKR1	ALH	BKR	ALH1BKR1	Glucose	1	-10	6.11e-09	-8.21366	-8.00145	1.46447	-0.0834986	-0.013402	absent
ALH1	BKR1	ALH	BKR	ALH1BKR1	Glucose	2	-10	1.32e-08	-7.87867	-11.2944	1.46447	-0.0834986	-0.013402	absent
ALH1	BKR1	ALH	BKR	ALH1BKR1	UY	1	-10	3.06e-08	-7.51367	-10.767	1.46447	-10	-10	absent
ALH1	BKR1	ALH	BKR	ALH1BKR1	UY	2	-10	1.4e-08	-7.85305	-11.3965	1.46447	-10	-10	absent
ALH1	BLL1	ALH	BLL	ALH1BLL1	Glycerol	2	-0.00425904	1.94e-08	-7.71275	-11.6249	1.46784	-1	0.120353	absent
ALH1	BLL1	ALH	BLL	ALH1BLL1	Glycerol	1	-0.00425904	7.72e-09	-8.11232	-12.5889	1.46784	-1	0.120353	absent
ALH1	BLL1	ALH	BLL	ALH1BLL1	Glucose	1	-0.0280853	6.11e-09	-8.21366	-7.68736	1.46784	-0.0834986	-1	absent
ALH1	BLL1	ALH	BLL	ALH1BLL1	Glucose	2	-0.0280853	1.32e-08	-7.87867	-11.602	1.46784	-0.0834986	-1	absent
ALH1	BLL1	ALH	BLL	ALH1BLL1	UY	1	-10	3.06e-08	-7.51367	-10.6206	1.46784	-10	-10	absent
ALH1	BLL1	ALH	BLL	ALH1BLL1	UY	2	-10	1.4e-08	-7.85305	-11.8653	1.46784	-10	-10	absent
ALH1	BNI1	ALH	BNI	ALH1BNI1	Glycerol	2	0.0174579	1.94e-08	-7.71275	-11.9216	1.46559	-1	-10	absent
ALH1	BNI1	ALH	BNI	ALH1BNI1	Glycerol	1	0.0174579	7.72e-09	-8.11232	-13.3061	1.46559	-1	-10	absent
ALH1	BNI1	ALH	BNI	ALH1BNI1	Glucose	1	-10	6.11e-09	-8.21366	-8.65917	1.46559	-0.0834986	-10	absent
ALH1	BNI1	ALH	BNI	ALH1BNI1	Glucose	2	-10	1.32e-08	-7.87867	-12.6292	1.46559	-0.0834986	-10	absent
ALH1	BNI1	ALH	BNI	ALH1BNI1	UY	1	-10	3.06e-08	-7.51367	-15.1011	1.46559	-10	-10	absent
ALH1	BNI1	ALH	BNI	ALH1BNI1	UY	2	-10	1.4e-08	-7.85305	-15.7799	1.46559	-10	-10	absent
ALH1	BQG1	ALH	BQG	ALH1BQG1	Glycerol	2	-0.0660277	1.94e-08	-7.71275	-11.2623	1.46401	-1	0.0537228	absent
ALH1	BQG1	ALH	BQG	ALH1BQG1	Glycerol	1	-0.0660277	7.72e-09	-8.11232	-11.9398	1.46401	-1	0.0537228	absent
ALH1	BQG1	ALH	BQG	ALH1BQG1	Glucose	1	-0.00614319	6.11e-09	-8.21366	-7.85088	1.46401	-0.0834986	-0.0571925	absent
ALH1	BQG1	ALH	BQG	ALH1BQG1	Glucose	2	-0.00614319	1.32e-08	-7.87867	-11.4102	1.46401	-0.0834986	-0.0571925	absent
ALH1	BQG1	ALH	BQG	ALH1BQG1	UY	1	-10	3.06e-08	-7.51367	-10.4592	1.46401	-10	-10	absent
ALH1	BQG1	ALH	BQG	ALH1BQG1	UY	2	-10	1.4e-08	-7.85305	-11.4601	1.46401	-10	-10	absent
ALH1	BNK1	ALH	BNK	ALH1BNK1	Glycerol	2	0.0283117	1.94e-08	-7.71275	-10.9685	1.46487	-1	0.115878	absent
ALH1	BNK1	ALH	BNK	ALH1BNK1	Glycerol	1	0.0283117	7.72e-09	-8.11232	-11.3181	1.46487	-1	0.115878	absent
ALH1	BNK1	ALH	BNK	ALH1BNK1	Glucose	1	-0.0226252	7.34e-07	-6.13447	-7.35749	1.46487	-0.0834986	-0.0796816	as_expected
ALH1	BNK1	ALH	BNK	ALH1BNK1	Glucose	2	-0.0226252	1.32e-08	-7.87867	-11.227	1.46487	-0.0834986	-0.0796816	absent
ALH1	BNK1	ALH	BNK	ALH1BNK1	UY	1	-10	3.06e-08	-7.51367	-10.372	1.46487	-10	-10	absent
ALH1	BNK1	ALH	BNK	ALH1BNK1	UY	2	-10	1.4e-08	-7.85305	-11.1863	1.46487	-10	-10	absent
ALH1	BPQ1	ALH	BPQ	ALH1BPQ1	Glycerol	2	-0.0832286	1.94e-08	-7.71275	-11.0219	1.45418	-1	0.0632255	absent
ALH1	BPQ1	ALH	BPQ	ALH1BPQ1	Glycerol	1	-0.0832286	7.72e-09	-8.11232	-11.2057	1.45418	-1	0.0632255	absent
ALH1	BPQ1	ALH	BPQ	ALH1BPQ1	Glucose	1	0.0110925	6.73e-07	-6.17226	-7.61185	1.45418	-0.0834986	0.00714221	as_expected
ALH1	BPQ1	ALH	BPQ	ALH1BPQ1	Glucose	2	0.0110925	1.32e-08	-7.87867	-11.2956	1.45418	-0.0834986	0.00714221	absent
ALH1	BPQ1	ALH	BPQ	ALH1BPQ1	UY	1	-10	3.06e-08	-7.51367	-10.9404	1.45418	-10	-10	absent
ALH1	BPQ1	ALH	BPQ	ALH1BPQ1	UY	2	-10	1.4e-08	-7.85305	-11.0312	1.45418	-10	-10	absent
ALH1	BQH1	ALH	BQH	ALH1BQH1	Glycerol	2	-10	1.94e-08	-7.71275	-15.8939	1.46883	-1	-1	absent
ALH1	BQH1	ALH	BQH	ALH1BQH1	Glycerol	1	-10	7.72e-09	-8.11232	-16.693	1.46883	-1	-1	absent
ALH1	BQH1	ALH	BQH	ALH1BQH1	Glucose	1	0.0117823	6.11e-09	-8.21366	-9.47006	1.46883	-0.0834986	0.0201877	absent
ALH1	BQH1	ALH	BQH	ALH1BQH1	Glucose	2	0.0117823	1.32e-08	-7.87867	-16.2257	1.46883	-0.0834986	0.0201877	absent
ALH1	BQH1	ALH	BQH	ALH1BQH1	UY	1	-10	3.06e-08	-7.51367	-15.4957	1.46883	-10	-10	absent
ALH1	BQH1	ALH	BQH	ALH1BQH1	UY	2	-10	1.4e-08	-7.85305	-16.1745	1.46883	-10	-10	absent
ALH1	BRA1	ALH	BRA	ALH1BRA1	Glycerol	2	-10	1.94e-08	-7.71275	-10.8638	1.458	-1	-1	absent
ALH1	BRA1	ALH	BRA	ALH1BRA1	Glycerol	1	-10	7.72e-09	-8.11232	-11.4273	1.458	-1	-1	absent
ALH1	BRA1	ALH	BRA	ALH1BRA1	Glucose	1	-10	6.11e-09	-8.21366	-7.61943	1.458	-0.0834986	-0.0988197	absent
ALH1	BRA1	ALH	BRA	ALH1BRA1	Glucose	2	-10	1.32e-08	-7.87867	-11.1313	1.458	-0.0834986	-0.0988197	absent
ALH1	BRA1	ALH	BRA	ALH1BRA1	UY	1	-10	3.06e-08	-7.51367	-10.8654	1.458	-10	-10	absent
ALH1	BRA1	ALH	BRA	ALH1BRA1	UY	2	-10	1.4e-08	-7.85305	-11.5757	1.458	-10	-10	absent
ALH1	BLN1	ALH	BLN	ALH1BLN1	Glycerol	2	-10	1.94e-08	-7.71275	-15.3802	1.46834	-1	-10	absent
ALH1	BLN1	ALH	BLN	ALH1BLN1	Glycerol	1	-10	7.72e-09	-8.11232	-16.1793	1.46834	-1	-10	absent
ALH1	BLN1	ALH	BLN	ALH1BLN1	Glucose	1	-10	6.11e-09	-8.21366	-8.66026	1.46834	-0.0834986	-10	absent
ALH1	BLN1	ALH	BLN	ALH1BLN1	Glucose	2	-10	1.32e-08	-7.87867	-12.2197	1.46834	-0.0834986	-10	absent
ALH1	BLN1	ALH	BLN	ALH1BLN1	UY	1	-10	3.06e-08	-7.51367	-14.982	1.46834	-10	-10	absent
ALH1	BLN1	ALH	BLN	ALH1BLN1	UY	2	-10	1.4e-08	-7.85305	-11.8549	1.46834	-10	-10	absent
ALH1	BQI1	ALH	BQI	ALH1BQI1	Glycerol	2	-10	1.94e-08	-7.71275	-15.5463	1.46664	-1	-0.01173	absent
ALH1	BQI1	ALH	BQI	ALH1BQI1	Glycerol	1	-10	7.72e-09	-8.11232	-12.8191	1.46664	-1	-0.01173	absent
ALH1	BQI1	ALH	BQI	ALH1BQI1	Glucose	1	-0.0250228	6.11e-09	-8.21366	-9.26364	1.46664	-0.0834986	-0.108288	absent
ALH1	BQI1	ALH	BQI	ALH1BQI1	Glucose	2	-0.0250228	1.32e-08	-7.87867	-12.6363	1.46664	-0.0834986	-0.108288	absent
ALH1	BQI1	ALH	BQI	ALH1BQI1	UY	1	-10	3.06e-08	-7.51367	-11.2457	1.46664	-10	-10	absent
ALH1	BQI1	ALH	BQI	ALH1BQI1	UY	2	-10	1.4e-08	-7.85305	-11.5564	1.46664	-10	-10	absent
ALH1	BRB1	ALH	BRB	ALH1BRB1	Glycerol	2	-0.0679351	1.94e-08	-7.71275	-11.2952	1.42854	-1	0.000627839	absent
ALH1	BRB1	ALH	BRB	ALH1BRB1	Glycerol	1	-0.0679351	7.72e-09	-8.11232	-12.121	1.42854	-1	0.000627839	absent
ALH1	BRB1	ALH	BRB	ALH1BRB1	Glucose	1	0.017552	0.00160151	-2.79547	-6.982	1.42854	-0.0834986	0.0350566	over_represented
ALH1	BRB1	ALH	BRB	ALH1BRB1	Glucose	2	0.017552	1.32e-08	-7.87867	-10.5911	1.42854	-0.0834986	0.0350566	absent
ALH1	BRB1	ALH	BRB	ALH1BRB1	UY	1	-10	3.06e-08	-7.51367	-10.4854	1.42854	-10	-10	absent
ALH1	BRB1	ALH	BRB	ALH1BRB1	UY	2	-10	1.4e-08	-7.85305	-11.4685	1.42854	-10	-10	absent
ALH1	BLP1	ALH	BLP	ALH1BLP1	Glycerol	2	-0.0488985	1.94e-08	-7.71275	-15.4629	1.46876	-1	0.0191829	absent
ALH1	BLP1	ALH	BLP	ALH1BLP1	Glycerol	1	-0.0488985	7.72e-09	-8.11232	-12.5402	1.46876	-1	0.0191829	absent
ALH1	BLP1	ALH	BLP	ALH1BLP1	Glucose	1	-10	6.11e-09	-8.21366	-12.4786	1.46876	-0.0834986	0.0477277	absent
ALH1	BLP1	ALH	BLP	ALH1BLP1	Glucose	2	-10	1.32e-08	-7.87867	-15.7948	1.46876	-0.0834986	0.0477277	absent
ALH1	BLP1	ALH	BLP	ALH1BLP1	UY	1	-10	3.06e-08	-7.51367	-15.0648	1.46876	-10	-10	absent
ALH1	BLP1	ALH	BLP	ALH1BLP1	UY	2	-10	1.4e-08	-7.85305	-15.7435	1.46876	-10	-10	absent
ALH1	BRC1	ALH	BRC	ALH1BRC1	Glycerol	2	-10	1.94e-08	-7.71275	-10.9291	1.45457	-1	-0.0845599	absent
ALH1	BRC1	ALH	BRC	ALH1BRC1	Glycerol	1	-10	7.72e-09	-8.11232	-11.1367	1.45457	-1	-0.0845599	absent
ALH1	BRC1	ALH	BRC	ALH1BRC1	Glucose	1	-0.00542011	1.22e-06	-5.91263	-7.14606	1.45457	-0.0834986	-0.0843597	as_expected
ALH1	BRC1	ALH	BRC	ALH1BRC1	Glucose	2	-0.00542011	1.32e-08	-7.87867	-10.9234	1.45457	-0.0834986	-0.0843597	absent
ALH1	BRC1	ALH	BRC	ALH1BRC1	UY	1	-10	3.06e-08	-7.51367	-11.5841	1.45457	-10	-10	absent
ALH1	BRC1	ALH	BRC	ALH1BRC1	UY	2	-10	1.4e-08	-7.85305	-11.1627	1.45457	-10	-10	absent
ALH1	BPT1	ALH	BPT	ALH1BPT1	Glycerol	2	-10	1.94e-08	-7.71275	-11.4469	1.46311	-1	0.0527905	absent
ALH1	BPT1	ALH	BPT	ALH1BPT1	Glycerol	1	-10	7.72e-09	-8.11232	-11.5289	1.46311	-1	0.0527905	absent
ALH1	BPT1	ALH	BPT	ALH1BPT1	Glucose	1	-0.02702	6.11e-09	-8.21366	-7.93513	1.46311	-0.0834986	-0.0226414	absent
ALH1	BPT1	ALH	BPT	ALH1BPT1	Glucose	2	-0.02702	1.32e-08	-7.87867	-11.6556	1.46311	-0.0834986	-0.0226414	absent
ALH1	BPT1	ALH	BPT	ALH1BPT1	UY	1	-10	3.06e-08	-7.51367	-10.8587	1.46311	-10	-10	absent
ALH1	BPT1	ALH	BPT	ALH1BPT1	UY	2	-10	1.4e-08	-7.85305	-11.4406	1.46311	-10	-10	absent
ALH1	BRD1	ALH	BRD	ALH1BRD1	Glycerol	2	-0.0179764	1.94e-08	-7.71275	-15.4268	1.46436	-1	0.10436	absent
ALH1	BRD1	ALH	BRD	ALH1BRD1	Glycerol	1	-0.0179764	7.72e-09	-8.11232	-12.3819	1.46436	-1	0.10436	absent
ALH1	BRD1	ALH	BRD	ALH1BRD1	Glucose	1	0.0271641	8.56e-07	-6.06753	-7.53253	1.46436	-0.0834986	-0.0248454	as_expected
ALH1	BRD1	ALH	BRD	ALH1BRD1	Glucose	2	0.0271641	1.32e-08	-7.87867	-11.1864	1.46436	-0.0834986	-0.0248454	absent
ALH1	BRD1	ALH	BRD	ALH1BRD1	UY	1	-10	3.06e-08	-7.51367	-11.3361	1.46436	-10	-10	absent
ALH1	BRD1	ALH	BRD	ALH1BRD1	UY	2	-10	1.4e-08	-7.85305	-12.0215	1.46436	-10	-10	absent
ALH1	BMK1	ALH	BMK	ALH1BMK1	Glycerol	2	-0.0423487	1.94e-08	-7.71275	-11.9899	1.46558	-1	0.0727937	absent
ALH1	BMK1	ALH	BMK	ALH1BMK1	Glycerol	1	-0.0423487	7.72e-09	-8.11232	-15.9646	1.46558	-1	0.0727937	absent
ALH1	BMK1	ALH	BMK	ALH1BMK1	Glucose	1	-0.0394272	6.11e-09	-8.21366	-7.4725	1.46558	-0.0834986	0.0206207	absent
ALH1	BMK1	ALH	BMK	ALH1BMK1	Glucose	2	-0.0394272	1.32e-08	-7.87867	-11.1731	1.46558	-0.0834986	0.0206207	absent
ALH1	BMK1	ALH	BMK	ALH1BMK1	UY	1	-10	3.06e-08	-7.51367	-10.7281	1.46558	-10	-10	absent
ALH1	BMK1	ALH	BMK	ALH1BMK1	UY	2	-10	1.4e-08	-7.85305	-12.063	1.46558	-10	-10	absent
ALH1	BQP1	ALH	BQP	ALH1BQP1	Glycerol	2	-10	1.94e-08	-7.71275	-15.3003	1.43813	-1	-0.0301991	absent
ALH1	BQP1	ALH	BQP	ALH1BQP1	Glycerol	1	-10	7.72e-09	-8.11232	-12.2034	1.43813	-1	-0.0301991	absent
ALH1	BQP1	ALH	BQP	ALH1BQP1	Glucose	1	-0.0373889	1.1e-06	-5.95838	-7.41927	1.43813	-0.0834986	0.0119541	as_expected
ALH1	BQP1	ALH	BQP	ALH1BQP1	Glucose	2	-0.0373889	1.32e-08	-7.87867	-10.9232	1.43813	-0.0834986	0.0119541	absent
ALH1	BQP1	ALH	BQP	ALH1BQP1	UY	1	-10	3.06e-08	-7.51367	-11.1971	1.43813	-10	-10	absent
ALH1	BQP1	ALH	BQP	ALH1BQP1	UY	2	-10	1.4e-08	-7.85305	-15.5809	1.43813	-10	-10	absent
ALH1	BLV1	ALH	BLV	ALH1BLV1	Glycerol	2	0.0099999	1.94e-08	-7.71275	-11.766	1.46396	-1	0.0838921	absent
ALH1	BLV1	ALH	BLV	ALH1BLV1	Glycerol	1	0.0099999	7.72e-09	-8.11232	-12.898	1.46396	-1	0.0838921	absent
ALH1	BLV1	ALH	BLV	ALH1BLV1	Glucose	1	-0.0138179	6.11e-09	-8.21366	-8.93716	1.46396	-0.0834986	-0.0681483	absent
ALH1	BLV1	ALH	BLV	ALH1BLV1	Glucose	2	-0.0138179	1.32e-08	-7.87867	-12.0922	1.46396	-0.0834986	-0.0681483	absent
ALH1	BLV1	ALH	BLV	ALH1BLV1	UY	1	-10	3.06e-08	-7.51367	-14.9851	1.46396	-10	-10	absent
ALH1	BLV1	ALH	BLV	ALH1BLV1	UY	2	-10	1.4e-08	-7.85305	-15.6638	1.46396	-10	-10	absent
ALH1	BQQ1	ALH	BQQ	ALH1BQQ1	Glycerol	2	-10	1.94e-08	-7.71275	-15.8714	1.46582	-1	0.0824425	absent
ALH1	BQQ1	ALH	BQQ	ALH1BQQ1	Glycerol	1	-10	7.72e-09	-8.11232	-16.6705	1.46582	-1	0.0824425	absent
ALH1	BQQ1	ALH	BQQ	ALH1BQQ1	Glucose	1	-0.0949103	6.11e-09	-8.21366	-9.43562	1.46582	-0.0834986	0.0291802	absent
ALH1	BQQ1	ALH	BQQ	ALH1BQQ1	Glucose	2	-0.0949103	1.32e-08	-7.87867	-16.2032	1.46582	-0.0834986	0.0291802	absent
ALH1	BQQ1	ALH	BQQ	ALH1BQQ1	UY	1	-10	3.06e-08	-7.51367	-15.4732	1.46582	-10	-10	absent
ALH1	BQQ1	ALH	BQQ	ALH1BQQ1	UY	2	-10	1.4e-08	-7.85305	-16.152	1.46582	-10	-10	absent
ALH1	BMA1	ALH	BMA	ALH1BMA1	Glycerol	2	-0.0717614	1.94e-08	-7.71275	-11.6333	1.3358	-1	0.0885346	absent
ALH1	BMA1	ALH	BMA	ALH1BMA1	Glycerol	1	-0.0717614	7.72e-09	-8.11232	-16.13	1.3358	-1	0.0885346	absent
ALH1	BMA1	ALH	BMA	ALH1BMA1	Glucose	1	-0.1195	6.11e-09	-8.21366	-7.98405	1.3358	-0.0834986	0.0277247	absent
ALH1	BMA1	ALH	BMA	ALH1BMA1	Glucose	2	-0.1195	1.32e-08	-7.87867	-11.6614	1.3358	-0.0834986	0.0277247	absent
ALH1	BMA1	ALH	BMA	ALH1BMA1	UY	1	-10	3.06e-08	-7.51367	-14.9327	1.3358	-10	-10	absent
ALH1	BMA1	ALH	BMA	ALH1BMA1	UY	2	-10	1.4e-08	-7.85305	-11.5965	1.3358	-10	-10	absent
ALH1	BQR1	ALH	BQR	ALH1BQR1	Glycerol	2	-0.0158763	1.94e-08	-7.71275	-11.3923	1.46475	-1	0.0588489	absent
ALH1	BQR1	ALH	BQR	ALH1BQR1	Glycerol	1	-0.0158763	7.72e-09	-8.11232	-11.9758	1.46475	-1	0.0588489	absent
ALH1	BQR1	ALH	BQR	ALH1BQR1	Glucose	1	-0.0356921	6.11e-09	-8.21366	-8.71872	1.46475	-0.0834986	-0.0545715	absent
ALH1	BQR1	ALH	BQR	ALH1BQR1	Glucose	2	-0.0356921	1.32e-08	-7.87867	-11.6006	1.46475	-0.0834986	-0.0545715	absent
ALH1	BQR1	ALH	BQR	ALH1BQR1	UY	1	-10	3.06e-08	-7.51367	-10.8451	1.46475	-10	-10	absent
ALH1	BQR1	ALH	BQR	ALH1BQR1	UY	2	-10	1.4e-08	-7.85305	-11.4712	1.46475	-10	-10	absent
ALH1	CAD1	ALH	CAD	ALH1CAD1	Glycerol	2	-10	1.94e-08	-7.71275	-15.0497	1.4937	-1	-10	absent
ALH1	CAD1	ALH	CAD	ALH1CAD1	Glycerol	1	-10	7.72e-09	-8.11232	-15.8489	1.4937	-1	-10	absent
ALH1	CAD1	ALH	CAD	ALH1CAD1	Glucose	1	-10	6.11e-09	-8.21366	-12.0654	1.4937	-0.0834986	-0.0194773	absent
ALH1	CAD1	ALH	CAD	ALH1CAD1	Glucose	2	-10	1.32e-08	-7.87867	-15.3816	1.4937	-0.0834986	-0.0194773	absent
ALH1	CAD1	ALH	CAD	ALH1CAD1	UY	1	-10	3.06e-08	-7.51367	-14.6516	1.4937	-10	-10	absent
ALH1	CAD1	ALH	CAD	ALH1CAD1	UY	2	-10	1.4e-08	-7.85305	-15.3303	1.4937	-10	-10	absent
ALH1	BSB1	ALH	BSB	ALH1BSB1	Glycerol	2	-10	1.94e-08	-7.71275	-16.3163	1.46287	-1	-10	absent
ALH1	BSB1	ALH	BSB	ALH1BSB1	Glycerol	1	-10	7.72e-09	-8.11232	-17.1154	1.46287	-1	-10	absent
ALH1	BSB1	ALH	BSB	ALH1BSB1	Glucose	1	-10	6.11e-09	-8.21366	-9.11212	1.46287	-0.0834986	-10	absent
ALH1	BSB1	ALH	BSB	ALH1BSB1	Glucose	2	-10	1.32e-08	-7.87867	-13.5741	1.46287	-0.0834986	-10	absent
ALH1	BSB1	ALH	BSB	ALH1BSB1	UY	1	-10	3.06e-08	-7.51367	-15.9181	1.46287	-10	-10	absent
ALH1	BSB1	ALH	BSB	ALH1BSB1	UY	2	-10	1.4e-08	-7.85305	-16.5969	1.46287	-10	-10	absent
ALH1	BTH1	ALH	BTH	ALH1BTH1	Glycerol	2	-10	1.94e-08	-7.71275	-10.3987	1.45892	-1	-1	absent
ALH1	BTH1	ALH	BTH	ALH1BTH1	Glycerol	1	-10	7.72e-09	-8.11232	-10.6677	1.45892	-1	-1	absent
ALH1	BTH1	ALH	BTH	ALH1BTH1	Glucose	1	-1	9.17e-07	-6.03756	-7.45507	1.45892	-0.0834986	-0.01391	as_expected
ALH1	BTH1	ALH	BTH	ALH1BTH1	Glucose	2	-1	1.32e-08	-7.87867	-11.0846	1.45892	-0.0834986	-0.01391	absent
ALH1	BTH1	ALH	BTH	ALH1BTH1	UY	1	-10	3.06e-08	-7.51367	-10.8731	1.45892	-10	-10	absent
ALH1	BTH1	ALH	BTH	ALH1BTH1	UY	2	-10	1.4e-08	-7.85305	-10.4112	1.45892	-10	-10	absent
ALH1	AHP1	ALH	AHP	ALH1AHP1	Glycerol	2	-1	1.94e-08	-7.71275	-15.3612	1.4997	-1	0.0888156	absent
ALH1	AHP1	ALH	AHP	ALH1AHP1	Glycerol	1	-1	7.72e-09	-8.11232	-16.1604	1.4997	-1	0.0888156	absent
ALH1	AHP1	ALH	AHP	ALH1AHP1	Glucose	1	-10	6.11e-09	-8.21366	-12.3769	1.4997	-0.0834986	-1	absent
ALH1	AHP1	ALH	AHP	ALH1AHP1	Glucose	2	-10	1.32e-08	-7.87867	-15.6931	1.4997	-0.0834986	-1	absent
ALH1	AHP1	ALH	AHP	ALH1AHP1	UY	1	-10	3.06e-08	-7.51367	-14.9631	1.4997	-10	-10	absent
ALH1	AHP1	ALH	AHP	ALH1AHP1	UY	2	-10	1.4e-08	-7.85305	-15.6418	1.4997	-10	-10	absent
ALH1	CQD1	ALH	CQD	ALH1CQD1	Glycerol	2	-10	1.94e-08	-7.71275	-12.0614	1.28342	-1	-10	absent
ALH1	CQD1	ALH	CQD	ALH1CQD1	Glycerol	1	-10	7.72e-09	-8.11232	-12.3991	1.28342	-1	-10	absent
ALH1	CQD1	ALH	CQD	ALH1CQD1	Glucose	1	-0.0151237	6.11e-09	-8.21366	-8.4792	1.28342	-0.0834986	0.0106465	absent
ALH1	CQD1	ALH	CQD	ALH1CQD1	Glucose	2	-0.0151237	1.32e-08	-7.87867	-11.8807	1.28342	-0.0834986	0.0106465	absent
ALH1	CQD1	ALH	CQD	ALH1CQD1	UY	1	-10	3.06e-08	-7.51367	-15.2391	1.28342	-10	-10	absent
ALH1	CQD1	ALH	CQD	ALH1CQD1	UY	2	-10	1.4e-08	-7.85305	-15.9178	1.28342	-10	-10	absent
ALH1	APV1	ALH	APV	ALH1APV1	Glycerol	2	-0.0123369	1.94e-08	-7.71275	-10.6991	1.46483	-1	0.176787	absent
ALH1	APV1	ALH	APV	ALH1APV1	Glycerol	1	-0.0123369	7.72e-09	-8.11232	-11.1314	1.46483	-1	0.176787	absent
ALH1	APV1	ALH	APV	ALH1APV1	Glucose	1	-10	6.11e-09	-8.21366	-7.93807	1.46483	-0.0834986	-0.0613302	absent
ALH1	APV1	ALH	APV	ALH1APV1	Glucose	2	-10	1.32e-08	-7.87867	-11.4041	1.46483	-0.0834986	-0.0613302	absent
ALH1	APV1	ALH	APV	ALH1APV1	UY	1	-10	3.06e-08	-7.51367	-10.4503	1.46483	-10	-10	absent
ALH1	APV1	ALH	APV	ALH1APV1	UY	2	-10	1.4e-08	-7.85305	-11.2116	1.46483	-10	-10	absent
ALH1	AST1	ALH	AST	ALH1AST1	Glycerol	2	-10	1.94e-08	-7.71275	-10.9719	1.39973	-1	-1	absent
ALH1	AST1	ALH	AST	ALH1AST1	Glycerol	1	-10	7.72e-09	-8.11232	-11.3827	1.39973	-1	-1	absent
ALH1	AST1	ALH	AST	ALH1AST1	Glucose	1	0.0134945	6.11e-09	-8.21366	-7.87192	1.39973	-0.0834986	0.0143308	absent
ALH1	AST1	ALH	AST	ALH1AST1	Glucose	2	0.0134945	1.32e-08	-7.87867	-11.549	1.39973	-0.0834986	0.0143308	absent
ALH1	AST1	ALH	AST	ALH1AST1	UY	1	-10	3.06e-08	-7.51367	-11.2842	1.39973	-10	-10	absent
ALH1	AST1	ALH	AST	ALH1AST1	UY	2	-10	1.4e-08	-7.85305	-10.9906	1.39973	-10	-10	absent
ALH1	CCV1	ALH	CCV	ALH1CCV1	Glycerol	2	-10	1.94e-08	-7.71275	-10.8144	0.965627	-1	-1	absent
ALH1	CCV1	ALH	CCV	ALH1CCV1	Glycerol	1	-10	7.72e-09	-8.11232	-11.5297	0.965627	-1	-1	absent
ALH1	CCV1	ALH	CCV	ALH1CCV1	Glucose	1	0.0232052	6.11e-09	-8.21366	-7.98515	0.965627	-0.0834986	0.044604	absent
ALH1	CCV1	ALH	CCV	ALH1CCV1	Glucose	2	0.0232052	1.32e-08	-7.87867	-11.2753	0.965627	-0.0834986	0.044604	absent
ALH1	CCV1	ALH	CCV	ALH1CCV1	UY	1	-10	3.06e-08	-7.51367	-11.2186	0.965627	-10	-10	absent
ALH1	CCV1	ALH	CCV	ALH1CCV1	UY	2	-10	1.4e-08	-7.85305	-10.9194	0.965627	-10	-10	absent
ALH1	YAR1	ALH	YAR	ALH1YAR1	Glycerol	2	-0.0913139	1.94e-08	-7.71275	-15.5992	1.1428	-1	-1	absent
ALH1	YAR1	ALH	YAR	ALH1YAR1	Glycerol	1	-0.0913139	7.72e-09	-8.11232	-16.3983	1.1428	-1	-1	absent
ALH1	YAR1	ALH	YAR	ALH1YAR1	Glucose	1	-0.014484	6.11e-09	-8.21366	-8.368	1.1428	-0.0834986	-0.0705407	absent
ALH1	YAR1	ALH	YAR	ALH1YAR1	Glucose	2	-0.014484	1.32e-08	-7.87867	-12.0769	1.1428	-0.0834986	-0.0705407	absent
ALH1	YAR1	ALH	YAR	ALH1YAR1	UY	1	-10	3.06e-08	-7.51367	-11.5425	1.1428	-10	-10	absent
ALH1	YAR1	ALH	YAR	ALH1YAR1	UY	2	-10	1.4e-08	-7.85305	-15.8798	1.1428	-10	-10	absent
ALH1	YBU1	ALH	YBU	ALH1YBU1	Glycerol	2	-10	1.94e-08	-7.71275	-10.8769	0.811618	-1	-1	absent
ALH1	YBU1	ALH	YBU	ALH1YBU1	Glycerol	1	-10	7.72e-09	-8.11232	-11.4293	0.811618	-1	-1	absent
ALH1	YBU1	ALH	YBU	ALH1YBU1	Glucose	1	-10	6.11e-09	-8.21366	-12.3872	0.811618	-0.0834986	-10	absent
ALH1	YBU1	ALH	YBU	ALH1YBU1	Glucose	2	-10	1.32e-08	-7.87867	-15.7034	0.811618	-0.0834986	-10	absent
ALH1	YBU1	ALH	YBU	ALH1YBU1	UY	1	-10	3.06e-08	-7.51367	-14.9734	0.811618	-10	-10	absent
ALH1	YBU1	ALH	YBU	ALH1YBU1	UY	2	-10	1.4e-08	-7.85305	-11.0173	0.811618	-10	-10	absent
AIM1	AKB1	AIM	AKB	AIM1AKB1	Glycerol	2	-10	1.94e-08	-7.71275	-12.6612	1.55717	-10	-1	absent
AIM1	AKB1	AIM	AKB	AIM1AKB1	Glycerol	1	-10	7.72e-09	-8.11232	-12.9522	1.55717	-10	-1	absent
AIM1	AKB1	AIM	AKB	AIM1AKB1	Glucose	1	-10	6.11e-09	-8.21366	-13.2925	1.55717	-1	-0.0154866	absent
AIM1	AKB1	AIM	AKB	AIM1AKB1	Glucose	2	-10	1.32e-08	-7.87867	-13.2183	1.55717	-1	-0.0154866	absent
AIM1	AKB1	AIM	AKB	AIM1AKB1	UY	1	-10	3.06e-08	-7.51367	-12.3077	1.55717	-10	-10	absent
AIM1	AKB1	AIM	AKB	AIM1AKB1	UY	2	-10	1.4e-08	-7.85305	-12.8825	1.55717	-10	-10	absent
AIM1	AKP1	AIM	AKP	AIM1AKP1	Glycerol	2	-10	1.94e-08	-7.71275	-11.704	0.27223	-10	-0.109008	absent
AIM1	AKP1	AIM	AKP	AIM1AKP1	Glycerol	1	-10	7.72e-09	-8.11232	-12.3776	0.27223	-10	-0.109008	absent
AIM1	AKP1	AIM	AKP	AIM1AKP1	Glucose	1	-1	6.11e-09	-8.21366	-12.15	0.27223	-1	-0.0557565	absent
AIM1	AKP1	AIM	AKP	AIM1AKP1	Glucose	2	-1	1.32e-08	-7.87867	-12.1034	0.27223	-1	-0.0557565	absent
AIM1	AKP1	AIM	AKP	AIM1AKP1	UY	1	-10	3.06e-08	-7.51367	-11.5741	0.27223	-10	-10	absent
AIM1	AKP1	AIM	AKP	AIM1AKP1	UY	2	-10	1.4e-08	-7.85305	-11.8458	0.27223	-10	-10	absent
AIM1	ALG1	AIM	ALG	AIM1ALG1	Glycerol	2	-10	1.94e-08	-7.71275	-16.4121	0.832878	-10	-0.0464457	absent
AIM1	ALG1	AIM	ALG	AIM1ALG1	Glycerol	1	-10	7.72e-09	-8.11232	-17.2112	0.832878	-10	-0.0464457	absent
AIM1	ALG1	AIM	ALG	AIM1ALG1	Glucose	1	-10	6.11e-09	-8.21366	-17.4139	0.832878	-1	-0.141619	absent
AIM1	ALG1	AIM	ALG	AIM1ALG1	Glucose	2	-10	1.32e-08	-7.87867	-16.7439	0.832878	-1	-0.141619	absent
AIM1	ALG1	AIM	ALG	AIM1ALG1	UY	1	-10	3.06e-08	-7.51367	-16.0139	0.832878	-10	-10	absent
AIM1	ALG1	AIM	ALG	AIM1ALG1	UY	2	-10	1.4e-08	-7.85305	-16.6927	0.832878	-10	-10	absent
AIM1	ANG1	AIM	ANG	AIM1ANG1	Glycerol	2	-10	1.94e-08	-7.71275	-16.7937	1.34695	-10	-1	absent
AIM1	ANG1	AIM	ANG	AIM1ANG1	Glycerol	1	-10	7.72e-09	-8.11232	-17.5928	1.34695	-10	-1	absent
AIM1	ANG1	AIM	ANG	AIM1ANG1	Glucose	1	-10	6.11e-09	-8.21366	-17.7955	1.34695	-1	0.0663533	absent
AIM1	ANG1	AIM	ANG	AIM1ANG1	Glucose	2	-10	1.32e-08	-7.87867	-17.1255	1.34695	-1	0.0663533	absent
AIM1	ANG1	AIM	ANG	AIM1ANG1	UY	1	-10	3.06e-08	-7.51367	-16.3955	1.34695	-10	-10	absent
AIM1	ANG1	AIM	ANG	AIM1ANG1	UY	2	-10	1.4e-08	-7.85305	-17.0743	1.34695	-10	-10	absent
AIM1	AIM1	AIM	AIM	AIM1AIM1	Glycerol	2	-10	1.94e-08	-7.71275	-16.5793	0	-10	-10	absent
AIM1	AIM1	AIM	AIM	AIM1AIM1	Glycerol	1	-10	7.72e-09	-8.11232	-17.3785	0	-10	-10	absent
AIM1	AIM1	AIM	AIM	AIM1AIM1	Glucose	1	-10	6.11e-09	-8.21366	-17.5811	0	-1	-10	absent
AIM1	AIM1	AIM	AIM	AIM1AIM1	Glucose	2	-10	1.32e-08	-7.87867	-16.9111	0	-1	-10	absent
AIM1	AIM1	AIM	AIM	AIM1AIM1	UY	1	-10	3.06e-08	-7.51367	-16.1812	0	-10	-10	absent
AIM1	AIM1	AIM	AIM	AIM1AIM1	UY	2	-10	1.4e-08	-7.85305	-16.8599	0	-10	-10	absent
AIM1	AKV1	AIM	AKV	AIM1AKV1	Glycerol	2	-10	1.94e-08	-7.71275	-11.4706	0.272524	-10	-0.0735332	absent
AIM1	AKV1	AIM	AKV	AIM1AKV1	Glycerol	1	-10	7.72e-09	-8.11232	-12.2589	0.272524	-10	-0.0735332	absent
AIM1	AKV1	AIM	AKV	AIM1AKV1	Glucose	1	-10	6.11e-09	-8.21366	-12.1175	0.272524	-1	-0.033945	absent
AIM1	AKV1	AIM	AKV	AIM1AKV1	Glucose	2	-10	1.32e-08	-7.87867	-11.7242	0.272524	-1	-0.033945	absent
AIM1	AKV1	AIM	AKV	AIM1AKV1	UY	1	-10	3.06e-08	-7.51367	-11.443	0.272524	-10	-10	absent
AIM1	AKV1	AIM	AKV	AIM1AKV1	UY	2	-10	1.4e-08	-7.85305	-12.0322	0.272524	-10	-10	absent
AIM1	BBI1	AIM	BBI	AIM1BBI1	Glycerol	2	-10	1.94e-08	-7.71275	-15.7821	0.276647	-10	-0.0628554	absent
AIM1	BBI1	AIM	BBI	AIM1BBI1	Glycerol	1	-10	7.72e-09	-8.11232	-16.5813	0.276647	-10	-0.0628554	absent
AIM1	BBI1	AIM	BBI	AIM1BBI1	Glucose	1	-10	6.11e-09	-8.21366	-15.0127	0.276647	-1	0.0118567	absent
AIM1	BBI1	AIM	BBI	AIM1BBI1	Glucose	2	-10	1.32e-08	-7.87867	-16.1139	0.276647	-1	0.0118567	absent
AIM1	BBI1	AIM	BBI	AIM1BBI1	UY	1	-10	3.06e-08	-7.51367	-15.384	0.276647	-10	-10	absent
AIM1	BBI1	AIM	BBI	AIM1BBI1	UY	2	-10	1.4e-08	-7.85305	-16.0627	0.276647	-10	-10	absent
AIM1	BAK1	AIM	BAK	AIM1BAK1	Glycerol	2	-10	1.94e-08	-7.71275	-16.3311	1.48924	-10	-0.00177197	absent
AIM1	BAK1	AIM	BAK	AIM1BAK1	Glycerol	1	-10	7.72e-09	-8.11232	-13.733	1.48924	-10	-0.00177197	absent
AIM1	BAK1	AIM	BAK	AIM1BAK1	Glucose	1	-10	6.11e-09	-8.21366	-13.2772	1.48924	-1	0.0639478	absent
AIM1	BAK1	AIM	BAK	AIM1BAK1	Glucose	2	-10	1.32e-08	-7.87867	-12.9995	1.48924	-1	0.0639478	absent
AIM1	BAK1	AIM	BAK	AIM1BAK1	UY	1	-10	3.06e-08	-7.51367	-12.3433	1.48924	-10	-10	absent
AIM1	BAK1	AIM	BAK	AIM1BAK1	UY	2	-10	1.4e-08	-7.85305	-12.5773	1.48924	-10	-10	absent
AIM1	BEH1	AIM	BEH	AIM1BEH1	Glycerol	2	-10	1.94e-08	-7.71275	-16.0141	1.48404	-10	-1	absent
AIM1	BEH1	AIM	BEH	AIM1BEH1	Glycerol	1	-10	7.72e-09	-8.11232	-16.8133	1.48404	-10	-1	absent
AIM1	BEH1	AIM	BEH	AIM1BEH1	Glucose	1	-10	6.11e-09	-8.21366	-17.0159	1.48404	-1	-0.0314472	absent
AIM1	BEH1	AIM	BEH	AIM1BEH1	Glucose	2	-10	1.32e-08	-7.87867	-16.346	1.48404	-1	-0.0314472	absent
AIM1	BEH1	AIM	BEH	AIM1BEH1	UY	1	-10	3.06e-08	-7.51367	-15.616	1.48404	-10	-10	absent
AIM1	BEH1	AIM	BEH	AIM1BEH1	UY	2	-10	1.4e-08	-7.85305	-16.2947	1.48404	-10	-10	absent
AIM1	BLA1	AIM	BLA	AIM1BLA1	Glycerol	2	-10	1.94e-08	-7.71275	-12.9872	0.266235	-10	-10	absent
AIM1	BLA1	AIM	BLA	AIM1BLA1	Glycerol	1	-10	7.72e-09	-8.11232	-16.9307	0.266235	-10	-10	absent
AIM1	BLA1	AIM	BLA	AIM1BLA1	Glucose	1	-10	6.11e-09	-8.21366	-12.9115	0.266235	-1	-10	absent
AIM1	BLA1	AIM	BLA	AIM1BLA1	Glucose	2	-10	1.32e-08	-7.87867	-16.4634	0.266235	-1	-10	absent
AIM1	BLA1	AIM	BLA	AIM1BLA1	UY	1	-10	3.06e-08	-7.51367	-14.0276	0.266235	-10	-10	absent
AIM1	BLA1	AIM	BLA	AIM1BLA1	UY	2	-10	1.4e-08	-7.85305	-12.7797	0.266235	-10	-10	absent
AIM1	BHM1	AIM	BHM	AIM1BHM1	Glycerol	2	-10	1.94e-08	-7.71275	-16.3959	0.348531	-10	-1	absent
AIM1	BHM1	AIM	BHM	AIM1BHM1	Glycerol	1	-10	7.72e-09	-8.11232	-17.1951	0.348531	-10	-1	absent
AIM1	BHM1	AIM	BHM	AIM1BHM1	Glucose	1	-10	6.11e-09	-8.21366	-17.3978	0.348531	-1	-10	absent
AIM1	BHM1	AIM	BHM	AIM1BHM1	Glucose	2	-10	1.32e-08	-7.87867	-16.7278	0.348531	-1	-10	absent
AIM1	BHM1	AIM	BHM	AIM1BHM1	UY	1	-10	3.06e-08	-7.51367	-15.9978	0.348531	-10	-10	absent
AIM1	BHM1	AIM	BHM	AIM1BHM1	UY	2	-10	1.4e-08	-7.85305	-16.6765	0.348531	-10	-10	absent
AIM1	BHN1	AIM	BHN	AIM1BHN1	Glycerol	2	-10	1.94e-08	-7.71275	-12.3615	0.278072	-10	-1	absent
AIM1	BHN1	AIM	BHN	AIM1BHN1	Glycerol	1	-10	7.72e-09	-8.11232	-12.6995	0.278072	-10	-1	absent
AIM1	BHN1	AIM	BHN	AIM1BHN1	Glucose	1	-10	6.11e-09	-8.21366	-12.5227	0.278072	-1	-1	absent
AIM1	BHN1	AIM	BHN	AIM1BHN1	Glucose	2	-10	1.32e-08	-7.87867	-12.0426	0.278072	-1	-1	absent
AIM1	BHN1	AIM	BHN	AIM1BHN1	UY	1	-10	3.06e-08	-7.51367	-11.8513	0.278072	-10	-10	absent
AIM1	BHN1	AIM	BHN	AIM1BHN1	UY	2	-10	1.4e-08	-7.85305	-12.7545	0.278072	-10	-10	absent
AIM1	BHB1	AIM	BHB	AIM1BHB1	Glycerol	2	-10	1.94e-08	-7.71275	-12.1962	0.284677	-10	-10	absent
AIM1	BHB1	AIM	BHB	AIM1BHB1	Glycerol	1	-10	7.72e-09	-8.11232	-12.6776	0.284677	-10	-10	absent
AIM1	BHB1	AIM	BHB	AIM1BHB1	Glucose	1	-10	6.11e-09	-8.21366	-11.838	0.284677	-1	-10	absent
AIM1	BHB1	AIM	BHB	AIM1BHB1	Glucose	2	-10	1.32e-08	-7.87867	-11.6063	0.284677	-1	-10	absent
AIM1	BHB1	AIM	BHB	AIM1BHB1	UY	1	-10	3.06e-08	-7.51367	-11.2366	0.284677	-10	-10	absent
AIM1	BHB1	AIM	BHB	AIM1BHB1	UY	2	-10	1.4e-08	-7.85305	-13.0792	0.284677	-10	-10	absent
AIM1	BLE1	AIM	BLE	AIM1BLE1	Glycerol	2	-10	1.94e-08	-7.71275	-11.5056	0.26877	-10	-0.044381	absent
AIM1	BLE1	AIM	BLE	AIM1BLE1	Glycerol	1	-10	7.72e-09	-8.11232	-11.8388	0.26877	-10	-0.044381	absent
AIM1	BLE1	AIM	BLE	AIM1BLE1	Glucose	1	-10	6.11e-09	-8.21366	-12.3798	0.26877	-1	-0.0748489	absent
AIM1	BLE1	AIM	BLE	AIM1BLE1	Glucose	2	-10	1.32e-08	-7.87867	-12.053	0.26877	-1	-0.0748489	absent
AIM1	BLE1	AIM	BLE	AIM1BLE1	UY	1	-10	3.06e-08	-7.51367	-11.5823	0.26877	-10	-10	absent
AIM1	BLE1	AIM	BLE	AIM1BLE1	UY	2	-10	1.4e-08	-7.85305	-11.7498	0.26877	-10	-10	absent
AIM1	BHF1	AIM	BHF	AIM1BHF1	Glycerol	2	-1	1.94e-08	-7.71275	-13.0377	0.261596	-10	0.0945635	absent
AIM1	BHF1	AIM	BHF	AIM1BHF1	Glycerol	1	-1	7.72e-09	-8.11232	-17.0251	0.261596	-10	0.0945635	absent
AIM1	BHF1	AIM	BHF	AIM1BHF1	Glucose	1	-10	6.11e-09	-8.21366	-12.7149	0.261596	-1	0.0612509	absent
AIM1	BHF1	AIM	BHF	AIM1BHF1	Glucose	2	-10	1.32e-08	-7.87867	-12.6816	0.261596	-1	0.0612509	absent
AIM1	BHF1	AIM	BHF	AIM1BHF1	UY	1	-10	3.06e-08	-7.51367	-11.713	0.261596	-10	-10	absent
AIM1	BHF1	AIM	BHF	AIM1BHF1	UY	2	-10	1.4e-08	-7.85305	-16.5066	0.261596	-10	-10	absent
AIM1	BKR1	AIM	BKR	AIM1BKR1	Glycerol	2	-10	1.94e-08	-7.71275	-12.4505	0.271068	-10	-1	absent
AIM1	BKR1	AIM	BKR	AIM1BKR1	Glycerol	1	-10	7.72e-09	-8.11232	-12.6893	0.271068	-10	-1	absent
AIM1	BKR1	AIM	BKR	AIM1BKR1	Glucose	1	-10	6.11e-09	-8.21366	-12.8694	0.271068	-1	-0.013402	absent
AIM1	BKR1	AIM	BKR	AIM1BKR1	Glucose	2	-10	1.32e-08	-7.87867	-12.1762	0.271068	-1	-0.013402	absent
AIM1	BKR1	AIM	BKR	AIM1BKR1	UY	1	-10	3.06e-08	-7.51367	-11.6488	0.271068	-10	-10	absent
AIM1	BKR1	AIM	BKR	AIM1BKR1	UY	2	-10	1.4e-08	-7.85305	-12.2783	0.271068	-10	-10	absent
AIM1	BLL1	AIM	BLL	AIM1BLL1	Glycerol	2	-1	1.94e-08	-7.71275	-12.5067	0.268367	-10	0.120353	absent
AIM1	BLL1	AIM	BLL	AIM1BLL1	Glycerol	1	-1	7.72e-09	-8.11232	-13.4707	0.268367	-10	0.120353	absent
AIM1	BLL1	AIM	BLL	AIM1BLL1	Glucose	1	-10	6.11e-09	-8.21366	-12.5553	0.268367	-1	-1	absent
AIM1	BLL1	AIM	BLL	AIM1BLL1	Glucose	2	-10	1.32e-08	-7.87867	-12.4838	0.268367	-1	-1	absent
AIM1	BLL1	AIM	BLL	AIM1BLL1	UY	1	-10	3.06e-08	-7.51367	-11.5024	0.268367	-10	-10	absent
AIM1	BLL1	AIM	BLL	AIM1BLL1	UY	2	-10	1.4e-08	-7.85305	-12.7471	0.268367	-10	-10	absent
AIM1	BNI1	AIM	BNI	AIM1BNI1	Glycerol	2	-10	1.94e-08	-7.71275	-12.8034	0.273356	-10	-10	absent
AIM1	BNI1	AIM	BNI	AIM1BNI1	Glycerol	1	-10	7.72e-09	-8.11232	-14.1879	0.273356	-10	-10	absent
AIM1	BNI1	AIM	BNI	AIM1BNI1	Glucose	1	-10	6.11e-09	-8.21366	-13.5271	0.273356	-1	-10	absent
AIM1	BNI1	AIM	BNI	AIM1BNI1	Glucose	2	-10	1.32e-08	-7.87867	-13.511	0.273356	-1	-10	absent
AIM1	BNI1	AIM	BNI	AIM1BNI1	UY	1	-10	3.06e-08	-7.51367	-15.9829	0.273356	-10	-10	absent
AIM1	BNI1	AIM	BNI	AIM1BNI1	UY	2	-10	1.4e-08	-7.85305	-16.6617	0.273356	-10	-10	absent
AIM1	BQG1	AIM	BQG	AIM1BQG1	Glycerol	2	-10	1.94e-08	-7.71275	-12.1441	0.269715	-10	0.0537228	absent
AIM1	BQG1	AIM	BQG	AIM1BQG1	Glycerol	1	-10	7.72e-09	-8.11232	-12.8216	0.269715	-10	0.0537228	absent
AIM1	BQG1	AIM	BQG	AIM1BQG1	Glucose	1	-10	6.11e-09	-8.21366	-12.7188	0.269715	-1	-0.0571925	absent
AIM1	BQG1	AIM	BQG	AIM1BQG1	Glucose	2	-10	1.32e-08	-7.87867	-12.292	0.269715	-1	-0.0571925	absent
AIM1	BQG1	AIM	BQG	AIM1BQG1	UY	1	-10	3.06e-08	-7.51367	-11.341	0.269715	-10	-10	absent
AIM1	BQG1	AIM	BQG	AIM1BQG1	UY	2	-10	1.4e-08	-7.85305	-12.3419	0.269715	-10	-10	absent
AIM1	BNK1	AIM	BNK	AIM1BNK1	Glycerol	2	-10	1.94e-08	-7.71275	-11.8503	0.266098	-10	0.115878	absent
AIM1	BNK1	AIM	BNK	AIM1BNK1	Glycerol	1	-10	7.72e-09	-8.11232	-12.1999	0.266098	-10	0.115878	absent
AIM1	BNK1	AIM	BNK	AIM1BNK1	Glucose	1	-10	6.11e-09	-8.21366	-12.2254	0.266098	-1	-0.0796816	absent
AIM1	BNK1	AIM	BNK	AIM1BNK1	Glucose	2	-10	1.32e-08	-7.87867	-12.1088	0.266098	-1	-0.0796816	absent
AIM1	BNK1	AIM	BNK	AIM1BNK1	UY	1	-10	3.06e-08	-7.51367	-11.2538	0.266098	-10	-10	absent
AIM1	BNK1	AIM	BNK	AIM1BNK1	UY	2	-10	1.4e-08	-7.85305	-12.0681	0.266098	-10	-10	absent
AIM1	BPQ1	AIM	BPQ	AIM1BPQ1	Glycerol	2	-10	1.94e-08	-7.71275	-11.9037	0.289865	-10	0.0632255	absent
AIM1	BPQ1	AIM	BPQ	AIM1BPQ1	Glycerol	1	-10	7.72e-09	-8.11232	-12.0875	0.289865	-10	0.0632255	absent
AIM1	BPQ1	AIM	BPQ	AIM1BPQ1	Glucose	1	-1	6.11e-09	-8.21366	-12.4798	0.289865	-1	0.00714221	absent
AIM1	BPQ1	AIM	BPQ	AIM1BPQ1	Glucose	2	-1	1.32e-08	-7.87867	-12.1774	0.289865	-1	0.00714221	absent
AIM1	BPQ1	AIM	BPQ	AIM1BPQ1	UY	1	-10	3.06e-08	-7.51367	-11.8222	0.289865	-10	-10	absent
AIM1	BPQ1	AIM	BPQ	AIM1BPQ1	UY	2	-10	1.4e-08	-7.85305	-11.913	0.289865	-10	-10	absent
AIM1	BQH1	AIM	BQH	AIM1BQH1	Glycerol	2	-10	1.94e-08	-7.71275	-16.7757	0.268434	-10	-1	absent
AIM1	BQH1	AIM	BQH	AIM1BQH1	Glycerol	1	-10	7.72e-09	-8.11232	-17.5748	0.268434	-10	-1	absent
AIM1	BQH1	AIM	BQH	AIM1BQH1	Glucose	1	-10	6.11e-09	-8.21366	-14.338	0.268434	-1	0.0201877	absent
AIM1	BQH1	AIM	BQH	AIM1BQH1	Glucose	2	-10	1.32e-08	-7.87867	-17.1075	0.268434	-1	0.0201877	absent
AIM1	BQH1	AIM	BQH	AIM1BQH1	UY	1	-10	3.06e-08	-7.51367	-16.3775	0.268434	-10	-10	absent
AIM1	BQH1	AIM	BQH	AIM1BQH1	UY	2	-10	1.4e-08	-7.85305	-17.0563	0.268434	-10	-10	absent
AIM1	BRA1	AIM	BRA	AIM1BRA1	Glycerol	2	-10	1.94e-08	-7.71275	-11.7456	0.279773	-10	-1	absent
AIM1	BRA1	AIM	BRA	AIM1BRA1	Glycerol	1	-10	7.72e-09	-8.11232	-12.3091	0.279773	-10	-1	absent
AIM1	BRA1	AIM	BRA	AIM1BRA1	Glucose	1	-10	6.11e-09	-8.21366	-12.4874	0.279773	-1	-0.0988197	absent
AIM1	BRA1	AIM	BRA	AIM1BRA1	Glucose	2	-10	1.32e-08	-7.87867	-12.0131	0.279773	-1	-0.0988197	absent
AIM1	BRA1	AIM	BRA	AIM1BRA1	UY	1	-10	3.06e-08	-7.51367	-11.7472	0.279773	-10	-10	absent
AIM1	BRA1	AIM	BRA	AIM1BRA1	UY	2	-10	1.4e-08	-7.85305	-12.4575	0.279773	-10	-10	absent
AIM1	BLN1	AIM	BLN	AIM1BLN1	Glycerol	2	-10	1.94e-08	-7.71275	-16.262	0.265925	-10	-10	absent
AIM1	BLN1	AIM	BLN	AIM1BLN1	Glycerol	1	-10	7.72e-09	-8.11232	-17.0611	0.265925	-10	-10	absent
AIM1	BLN1	AIM	BLN	AIM1BLN1	Glucose	1	-10	6.11e-09	-8.21366	-13.5282	0.265925	-1	-10	absent
AIM1	BLN1	AIM	BLN	AIM1BLN1	Glucose	2	-10	1.32e-08	-7.87867	-13.1015	0.265925	-1	-10	absent
AIM1	BLN1	AIM	BLN	AIM1BLN1	UY	1	-10	3.06e-08	-7.51367	-15.8638	0.265925	-10	-10	absent
AIM1	BLN1	AIM	BLN	AIM1BLN1	UY	2	-10	1.4e-08	-7.85305	-12.7367	0.265925	-10	-10	absent
AIM1	BQI1	AIM	BQI	AIM1BQI1	Glycerol	2	-10	1.94e-08	-7.71275	-16.4281	0.267161	-10	-0.01173	absent
AIM1	BQI1	AIM	BQI	AIM1BQI1	Glycerol	1	-10	7.72e-09	-8.11232	-13.7009	0.267161	-10	-0.01173	absent
AIM1	BQI1	AIM	BQI	AIM1BQI1	Glucose	1	-10	6.11e-09	-8.21366	-14.1316	0.267161	-1	-0.108288	absent
AIM1	BQI1	AIM	BQI	AIM1BQI1	Glucose	2	-10	1.32e-08	-7.87867	-13.5181	0.267161	-1	-0.108288	absent
AIM1	BQI1	AIM	BQI	AIM1BQI1	UY	1	-10	3.06e-08	-7.51367	-12.1275	0.267161	-10	-10	absent
AIM1	BQI1	AIM	BQI	AIM1BQI1	UY	2	-10	1.4e-08	-7.85305	-12.4382	0.267161	-10	-10	absent
AIM1	BRB1	AIM	BRB	AIM1BRB1	Glycerol	2	-1	1.94e-08	-7.71275	-12.177	0.348494	-10	0.000627839	absent
AIM1	BRB1	AIM	BRB	AIM1BRB1	Glycerol	1	-1	7.72e-09	-8.11232	-13.0028	0.348494	-10	0.000627839	absent
AIM1	BRB1	AIM	BRB	AIM1BRB1	Glucose	1	-0.11427	6.11e-09	-8.21366	-11.85	0.348494	-1	0.0350566	absent
AIM1	BRB1	AIM	BRB	AIM1BRB1	Glucose	2	-0.11427	1.32e-08	-7.87867	-11.4729	0.348494	-1	0.0350566	absent
AIM1	BRB1	AIM	BRB	AIM1BRB1	UY	1	-10	3.06e-08	-7.51367	-11.3672	0.348494	-10	-10	absent
AIM1	BRB1	AIM	BRB	AIM1BRB1	UY	2	-10	1.4e-08	-7.85305	-12.3503	0.348494	-10	-10	absent
AIM1	BLP1	AIM	BLP	AIM1BLP1	Glycerol	2	-10	1.94e-08	-7.71275	-16.3447	0.266216	-10	0.0191829	absent
AIM1	BLP1	AIM	BLP	AIM1BLP1	Glycerol	1	-10	7.72e-09	-8.11232	-13.422	0.266216	-10	0.0191829	absent
AIM1	BLP1	AIM	BLP	AIM1BLP1	Glucose	1	-10	6.11e-09	-8.21366	-17.3465	0.266216	-1	0.0477277	absent
AIM1	BLP1	AIM	BLP	AIM1BLP1	Glucose	2	-10	1.32e-08	-7.87867	-16.6766	0.266216	-1	0.0477277	absent
AIM1	BLP1	AIM	BLP	AIM1BLP1	UY	1	-10	3.06e-08	-7.51367	-15.9466	0.266216	-10	-10	absent
AIM1	BLP1	AIM	BLP	AIM1BLP1	UY	2	-10	1.4e-08	-7.85305	-16.6253	0.266216	-10	-10	absent
AIM1	BRC1	AIM	BRC	AIM1BRC1	Glycerol	2	-10	1.94e-08	-7.71275	-11.8109	0.276346	-10	-0.0845599	absent
AIM1	BRC1	AIM	BRC	AIM1BRC1	Glycerol	1	-10	7.72e-09	-8.11232	-12.0185	0.276346	-10	-0.0845599	absent
AIM1	BRC1	AIM	BRC	AIM1BRC1	Glucose	1	-10	6.11e-09	-8.21366	-12.014	0.276346	-1	-0.0843597	absent
AIM1	BRC1	AIM	BRC	AIM1BRC1	Glucose	2	-10	1.32e-08	-7.87867	-11.8052	0.276346	-1	-0.0843597	absent
AIM1	BRC1	AIM	BRC	AIM1BRC1	UY	1	-10	3.06e-08	-7.51367	-12.4659	0.276346	-10	-10	absent
AIM1	BRC1	AIM	BRC	AIM1BRC1	UY	2	-10	1.4e-08	-7.85305	-12.0445	0.276346	-10	-10	absent
AIM1	BPT1	AIM	BPT	AIM1BPT1	Glycerol	2	-10	1.94e-08	-7.71275	-12.3287	0.261432	-10	0.0527905	absent
AIM1	BPT1	AIM	BPT	AIM1BPT1	Glycerol	1	-10	7.72e-09	-8.11232	-12.4107	0.261432	-10	0.0527905	absent
AIM1	BPT1	AIM	BPT	AIM1BPT1	Glucose	1	-10	6.11e-09	-8.21366	-12.8031	0.261432	-1	-0.0226414	absent
AIM1	BPT1	AIM	BPT	AIM1BPT1	Glucose	2	-10	1.32e-08	-7.87867	-12.5374	0.261432	-1	-0.0226414	absent
AIM1	BPT1	AIM	BPT	AIM1BPT1	UY	1	-10	3.06e-08	-7.51367	-11.7405	0.261432	-10	-10	absent
AIM1	BPT1	AIM	BPT	AIM1BPT1	UY	2	-10	1.4e-08	-7.85305	-12.3224	0.261432	-10	-10	absent
AIM1	BRD1	AIM	BRD	AIM1BRD1	Glycerol	2	-0.00371787	1.94e-08	-7.71275	-16.3086	0.264681	-10	0.10436	absent
AIM1	BRD1	AIM	BRD	AIM1BRD1	Glycerol	1	-0.00371787	7.72e-09	-8.11232	-13.2637	0.264681	-10	0.10436	absent
AIM1	BRD1	AIM	BRD	AIM1BRD1	Glucose	1	-0.0119832	6.11e-09	-8.21366	-12.4005	0.264681	-1	-0.0248454	absent
AIM1	BRD1	AIM	BRD	AIM1BRD1	Glucose	2	-0.0119832	1.32e-08	-7.87867	-12.0682	0.264681	-1	-0.0248454	absent
AIM1	BRD1	AIM	BRD	AIM1BRD1	UY	1	-10	3.06e-08	-7.51367	-12.2179	0.264681	-10	-10	absent
AIM1	BRD1	AIM	BRD	AIM1BRD1	UY	2	-10	1.4e-08	-7.85305	-12.9033	0.264681	-10	-10	absent
AIM1	BMK1	AIM	BMK	AIM1BMK1	Glycerol	2	-10	1.94e-08	-7.71275	-12.8717	0.261719	-10	0.0727937	absent
AIM1	BMK1	AIM	BMK	AIM1BMK1	Glycerol	1	-10	7.72e-09	-8.11232	-16.8464	0.261719	-10	0.0727937	absent
AIM1	BMK1	AIM	BMK	AIM1BMK1	Glucose	1	-10	6.11e-09	-8.21366	-12.3405	0.261719	-1	0.0206207	absent
AIM1	BMK1	AIM	BMK	AIM1BMK1	Glucose	2	-10	1.32e-08	-7.87867	-12.0549	0.261719	-1	0.0206207	absent
AIM1	BMK1	AIM	BMK	AIM1BMK1	UY	1	-10	3.06e-08	-7.51367	-11.6099	0.261719	-10	-10	absent
AIM1	BMK1	AIM	BMK	AIM1BMK1	UY	2	-10	1.4e-08	-7.85305	-12.9448	0.261719	-10	-10	absent
AIM1	BQP1	AIM	BQP	AIM1BQP1	Glycerol	2	-10	1.94e-08	-7.71275	-16.1821	0.309614	-10	-0.0301991	absent
AIM1	BQP1	AIM	BQP	AIM1BQP1	Glycerol	1	-10	7.72e-09	-8.11232	-13.0852	0.309614	-10	-0.0301991	absent
AIM1	BQP1	AIM	BQP	AIM1BQP1	Glucose	1	-1	6.11e-09	-8.21366	-12.2872	0.309614	-1	0.0119541	absent
AIM1	BQP1	AIM	BQP	AIM1BQP1	Glucose	2	-1	1.32e-08	-7.87867	-11.805	0.309614	-1	0.0119541	absent
AIM1	BQP1	AIM	BQP	AIM1BQP1	UY	1	-10	3.06e-08	-7.51367	-12.0789	0.309614	-10	-10	absent
AIM1	BQP1	AIM	BQP	AIM1BQP1	UY	2	-10	1.4e-08	-7.85305	-16.4627	0.309614	-10	-10	absent
AIM1	BLV1	AIM	BLV	AIM1BLV1	Glycerol	2	-10	1.94e-08	-7.71275	-12.6478	0.269558	-10	0.0838921	absent
AIM1	BLV1	AIM	BLV	AIM1BLV1	Glycerol	1	-10	7.72e-09	-8.11232	-13.7798	0.269558	-10	0.0838921	absent
AIM1	BLV1	AIM	BLV	AIM1BLV1	Glucose	1	-10	6.11e-09	-8.21366	-13.8051	0.269558	-1	-0.0681483	absent
AIM1	BLV1	AIM	BLV	AIM1BLV1	Glucose	2	-10	1.32e-08	-7.87867	-12.974	0.269558	-1	-0.0681483	absent
AIM1	BLV1	AIM	BLV	AIM1BLV1	UY	1	-10	3.06e-08	-7.51367	-15.8669	0.269558	-10	-10	absent
AIM1	BLV1	AIM	BLV	AIM1BLV1	UY	2	-10	1.4e-08	-7.85305	-16.5456	0.269558	-10	-10	absent
AIM1	BQQ1	AIM	BQQ	AIM1BQQ1	Glycerol	2	-10	1.94e-08	-7.71275	-16.7532	0.265526	-10	0.0824425	absent
AIM1	BQQ1	AIM	BQQ	AIM1BQQ1	Glycerol	1	-10	7.72e-09	-8.11232	-17.5523	0.265526	-10	0.0824425	absent
AIM1	BQQ1	AIM	BQQ	AIM1BQQ1	Glucose	1	-10	6.11e-09	-8.21366	-14.3036	0.265526	-1	0.0291802	absent
AIM1	BQQ1	AIM	BQQ	AIM1BQQ1	Glucose	2	-10	1.32e-08	-7.87867	-17.085	0.265526	-1	0.0291802	absent
AIM1	BQQ1	AIM	BQQ	AIM1BQQ1	UY	1	-10	3.06e-08	-7.51367	-16.355	0.265526	-10	-10	absent
AIM1	BQQ1	AIM	BQQ	AIM1BQQ1	UY	2	-10	1.4e-08	-7.85305	-17.0338	0.265526	-10	-10	absent
AIM1	BMA1	AIM	BMA	AIM1BMA1	Glycerol	2	-10	1.94e-08	-7.71275	-12.5151	1.58534	-10	0.0885346	absent
AIM1	BMA1	AIM	BMA	AIM1BMA1	Glycerol	1	-10	7.72e-09	-8.11232	-17.0118	1.58534	-10	0.0885346	absent
AIM1	BMA1	AIM	BMA	AIM1BMA1	Glucose	1	-10	6.11e-09	-8.21366	-12.852	1.58534	-1	0.0277247	absent
AIM1	BMA1	AIM	BMA	AIM1BMA1	Glucose	2	-10	1.32e-08	-7.87867	-12.5432	1.58534	-1	0.0277247	absent
AIM1	BMA1	AIM	BMA	AIM1BMA1	UY	1	-10	3.06e-08	-7.51367	-15.8145	1.58534	-10	-10	absent
AIM1	BMA1	AIM	BMA	AIM1BMA1	UY	2	-10	1.4e-08	-7.85305	-12.4783	1.58534	-10	-10	absent
AIM1	BQR1	AIM	BQR	AIM1BQR1	Glycerol	2	-10	1.94e-08	-7.71275	-12.2741	0.264221	-10	0.0588489	absent
AIM1	BQR1	AIM	BQR	AIM1BQR1	Glycerol	1	-10	7.72e-09	-8.11232	-12.8576	0.264221	-10	0.0588489	absent
AIM1	BQR1	AIM	BQR	AIM1BQR1	Glucose	1	-10	6.11e-09	-8.21366	-13.5867	0.264221	-1	-0.0545715	absent
AIM1	BQR1	AIM	BQR	AIM1BQR1	Glucose	2	-10	1.32e-08	-7.87867	-12.4824	0.264221	-1	-0.0545715	absent
AIM1	BQR1	AIM	BQR	AIM1BQR1	UY	1	-10	3.06e-08	-7.51367	-11.7269	0.264221	-10	-10	absent
AIM1	BQR1	AIM	BQR	AIM1BQR1	UY	2	-10	1.4e-08	-7.85305	-12.353	0.264221	-10	-10	absent
AIM1	CAD1	AIM	CAD	AIM1CAD1	Glycerol	2	-10	1.94e-08	-7.71275	-15.9315	0.249474	-10	-10	absent
AIM1	CAD1	AIM	CAD	AIM1CAD1	Glycerol	1	-10	7.72e-09	-8.11232	-16.7307	0.249474	-10	-10	absent
AIM1	CAD1	AIM	CAD	AIM1CAD1	Glucose	1	-10	6.11e-09	-8.21366	-16.9334	0.249474	-1	-0.0194773	absent
AIM1	CAD1	AIM	CAD	AIM1CAD1	Glucose	2	-10	1.32e-08	-7.87867	-16.2634	0.249474	-1	-0.0194773	absent
AIM1	CAD1	AIM	CAD	AIM1CAD1	UY	1	-10	3.06e-08	-7.51367	-15.5334	0.249474	-10	-10	absent
AIM1	CAD1	AIM	CAD	AIM1CAD1	UY	2	-10	1.4e-08	-7.85305	-16.2121	0.249474	-10	-10	absent
AIM1	BSB1	AIM	BSB	AIM1BSB1	Glycerol	2	-10	1.94e-08	-7.71275	-17.1981	0.262629	-10	-10	absent
AIM1	BSB1	AIM	BSB	AIM1BSB1	Glycerol	1	-10	7.72e-09	-8.11232	-17.9972	0.262629	-10	-10	absent
AIM1	BSB1	AIM	BSB	AIM1BSB1	Glucose	1	-10	6.11e-09	-8.21366	-13.9801	0.262629	-1	-10	absent
AIM1	BSB1	AIM	BSB	AIM1BSB1	Glucose	2	-10	1.32e-08	-7.87867	-14.4559	0.262629	-1	-10	absent
AIM1	BSB1	AIM	BSB	AIM1BSB1	UY	1	-10	3.06e-08	-7.51367	-16.7999	0.262629	-10	-10	absent
AIM1	BSB1	AIM	BSB	AIM1BSB1	UY	2	-10	1.4e-08	-7.85305	-17.4787	0.262629	-10	-10	absent
AIM1	BTH1	AIM	BTH	AIM1BTH1	Glycerol	2	-10	1.94e-08	-7.71275	-11.2805	0.265926	-10	-1	absent
AIM1	BTH1	AIM	BTH	AIM1BTH1	Glycerol	1	-10	7.72e-09	-8.11232	-11.5495	0.265926	-10	-1	absent
AIM1	BTH1	AIM	BTH	AIM1BTH1	Glucose	1	-10	6.11e-09	-8.21366	-12.323	0.265926	-1	-0.01391	absent
AIM1	BTH1	AIM	BTH	AIM1BTH1	Glucose	2	-10	1.32e-08	-7.87867	-11.9664	0.265926	-1	-0.01391	absent
AIM1	BTH1	AIM	BTH	AIM1BTH1	UY	1	-10	3.06e-08	-7.51367	-11.7549	0.265926	-10	-10	absent
AIM1	BTH1	AIM	BTH	AIM1BTH1	UY	2	-10	1.4e-08	-7.85305	-11.293	0.265926	-10	-10	absent
AIM1	AHP1	AIM	AHP	AIM1AHP1	Glycerol	2	-10	1.94e-08	-7.71275	-16.243	0.258145	-10	0.0888156	absent
AIM1	AHP1	AIM	AHP	AIM1AHP1	Glycerol	1	-10	7.72e-09	-8.11232	-17.0422	0.258145	-10	0.0888156	absent
AIM1	AHP1	AIM	AHP	AIM1AHP1	Glucose	1	-10	6.11e-09	-8.21366	-17.2449	0.258145	-1	-1	absent
AIM1	AHP1	AIM	AHP	AIM1AHP1	Glucose	2	-10	1.32e-08	-7.87867	-16.5749	0.258145	-1	-1	absent
AIM1	AHP1	AIM	AHP	AIM1AHP1	UY	1	-10	3.06e-08	-7.51367	-15.8449	0.258145	-10	-10	absent
AIM1	AHP1	AIM	AHP	AIM1AHP1	UY	2	-10	1.4e-08	-7.85305	-16.5236	0.258145	-10	-10	absent
AIM1	CQD1	AIM	CQD	AIM1CQD1	Glycerol	2	-10	1.94e-08	-7.71275	-12.9432	0.825001	-10	-10	absent
AIM1	CQD1	AIM	CQD	AIM1CQD1	Glycerol	1	-10	7.72e-09	-8.11232	-13.2809	0.825001	-10	-10	absent
AIM1	CQD1	AIM	CQD	AIM1CQD1	Glucose	1	-10	6.11e-09	-8.21366	-13.3472	0.825001	-1	0.0106465	absent
AIM1	CQD1	AIM	CQD	AIM1CQD1	Glucose	2	-10	1.32e-08	-7.87867	-12.7625	0.825001	-1	0.0106465	absent
AIM1	CQD1	AIM	CQD	AIM1CQD1	UY	1	-10	3.06e-08	-7.51367	-16.1209	0.825001	-10	-10	absent
AIM1	CQD1	AIM	CQD	AIM1CQD1	UY	2	-10	1.4e-08	-7.85305	-16.7996	0.825001	-10	-10	absent
AIM1	APV1	AIM	APV	AIM1APV1	Glycerol	2	-10	1.94e-08	-7.71275	-11.5809	0.26515	-10	0.176787	absent
AIM1	APV1	AIM	APV	AIM1APV1	Glycerol	1	-10	7.72e-09	-8.11232	-12.0132	0.26515	-10	0.176787	absent
AIM1	APV1	AIM	APV	AIM1APV1	Glucose	1	-10	6.11e-09	-8.21366	-12.806	0.26515	-1	-0.0613302	absent
AIM1	APV1	AIM	APV	AIM1APV1	Glucose	2	-10	1.32e-08	-7.87867	-12.2859	0.26515	-1	-0.0613302	absent
AIM1	APV1	AIM	APV	AIM1APV1	UY	1	-10	3.06e-08	-7.51367	-11.3321	0.26515	-10	-10	absent
AIM1	APV1	AIM	APV	AIM1APV1	UY	2	-10	1.4e-08	-7.85305	-12.0934	0.26515	-10	-10	absent
AIM1	AST1	AIM	AST	AIM1AST1	Glycerol	2	-10	1.94e-08	-7.71275	-11.8537	0.3895	-10	-1	absent
AIM1	AST1	AIM	AST	AIM1AST1	Glycerol	1	-10	7.72e-09	-8.11232	-12.2645	0.3895	-10	-1	absent
AIM1	AST1	AIM	AST	AIM1AST1	Glucose	1	-10	6.11e-09	-8.21366	-12.7399	0.3895	-1	0.0143308	absent
AIM1	AST1	AIM	AST	AIM1AST1	Glucose	2	-10	1.32e-08	-7.87867	-12.4308	0.3895	-1	0.0143308	absent
AIM1	AST1	AIM	AST	AIM1AST1	UY	1	-10	3.06e-08	-7.51367	-12.166	0.3895	-10	-10	absent
AIM1	AST1	AIM	AST	AIM1AST1	UY	2	-10	1.4e-08	-7.85305	-11.8724	0.3895	-10	-10	absent
AIM1	CCV1	AIM	CCV	AIM1CCV1	Glycerol	2	-10	1.94e-08	-7.71275	-11.6962	1.47885	-10	-1	absent
AIM1	CCV1	AIM	CCV	AIM1CCV1	Glycerol	1	-10	7.72e-09	-8.11232	-12.4115	1.47885	-10	-1	absent
AIM1	CCV1	AIM	CCV	AIM1CCV1	Glucose	1	-10	6.11e-09	-8.21366	-12.8531	1.47885	-1	0.044604	absent
AIM1	CCV1	AIM	CCV	AIM1CCV1	Glucose	2	-10	1.32e-08	-7.87867	-12.1571	1.47885	-1	0.044604	absent
AIM1	CCV1	AIM	CCV	AIM1CCV1	UY	1	-10	3.06e-08	-7.51367	-12.1004	1.47885	-10	-10	absent
AIM1	CCV1	AIM	CCV	AIM1CCV1	UY	2	-10	1.4e-08	-7.85305	-11.8012	1.47885	-10	-10	absent
AIM1	YAR1	AIM	YAR	AIM1YAR1	Glycerol	2	-10	1.94e-08	-7.71275	-16.481	0.857876	-10	-1	absent
AIM1	YAR1	AIM	YAR	AIM1YAR1	Glycerol	1	-10	7.72e-09	-8.11232	-17.2801	0.857876	-10	-1	absent
AIM1	YAR1	AIM	YAR	AIM1YAR1	Glucose	1	-10	6.11e-09	-8.21366	-13.236	0.857876	-1	-0.0705407	absent
AIM1	YAR1	AIM	YAR	AIM1YAR1	Glucose	2	-10	1.32e-08	-7.87867	-12.9587	0.857876	-1	-0.0705407	absent
AIM1	YAR1	AIM	YAR	AIM1YAR1	UY	1	-10	3.06e-08	-7.51367	-12.4243	0.857876	-10	-10	absent
AIM1	YAR1	AIM	YAR	AIM1YAR1	UY	2	-10	1.4e-08	-7.85305	-16.7616	0.857876	-10	-10	absent
AIM1	YBU1	AIM	YBU	AIM1YBU1	Glycerol	2	-10	1.94e-08	-7.71275	-11.7587	1.10414	-10	-1	absent
AIM1	YBU1	AIM	YBU	AIM1YBU1	Glycerol	1	-10	7.72e-09	-8.11232	-12.3111	1.10414	-10	-1	absent
AIM1	YBU1	AIM	YBU	AIM1YBU1	Glucose	1	-10	6.11e-09	-8.21366	-17.2552	1.10414	-1	-10	absent
AIM1	YBU1	AIM	YBU	AIM1YBU1	Glucose	2	-10	1.32e-08	-7.87867	-16.5852	1.10414	-1	-10	absent
AIM1	YBU1	AIM	YBU	AIM1YBU1	UY	1	-10	3.06e-08	-7.51367	-15.8552	1.10414	-10	-10	absent
AIM1	YBU1	AIM	YBU	AIM1YBU1	UY	2	-10	1.4e-08	-7.85305	-11.8991	1.10414	-10	-10	absent
AKS1	AKB1	AKS	AKB	AKS1AKB1	Glycerol	2	-10	1.94e-08	-7.71275	-12.0107	1.28017	-1	-1	absent
AKS1	AKB1	AKS	AKB	AKS1AKB1	Glycerol	1	-10	7.72e-09	-8.11232	-8.68134	1.28017	-1	-1	absent
AKS1	AKB1	AKS	AKB	AKS1AKB1	Glucose	1	0.0593533	6.11e-09	-8.21366	-12.642	1.28017	-0.128884	-0.0154866	absent
AKS1	AKB1	AKS	AKB	AKS1AKB1	Glucose	2	0.0593533	1.32e-08	-7.87867	-12.5678	1.28017	-0.128884	-0.0154866	absent
AKS1	AKB1	AKS	AKB	AKS1AKB1	UY	1	-10	3.06e-08	-7.51367	-11.6572	1.28017	-10	-10	absent
AKS1	AKB1	AKS	AKB	AKS1AKB1	UY	2	-10	1.4e-08	-7.85305	-12.2319	1.28017	-10	-10	absent
AKS1	AKP1	AKS	AKP	AKS1AKP1	Glycerol	2	-10	1.94e-08	-7.71275	-11.0534	0.94878	-1	-0.109008	absent
AKS1	AKP1	AKS	AKP	AKS1AKP1	Glycerol	1	-10	7.72e-09	-8.11232	-8.10675	0.94878	-1	-0.109008	absent
AKS1	AKP1	AKS	AKP	AKS1AKP1	Glucose	1	-0.0214573	6.11e-09	-8.21366	-11.4994	0.94878	-0.128884	-0.0557565	absent
AKS1	AKP1	AKS	AKP	AKS1AKP1	Glucose	2	-0.0214573	1.32e-08	-7.87867	-11.4528	0.94878	-0.128884	-0.0557565	absent
AKS1	AKP1	AKS	AKP	AKS1AKP1	UY	1	-10	3.06e-08	-7.51367	-10.9236	0.94878	-10	-10	absent
AKS1	AKP1	AKS	AKP	AKS1AKP1	UY	2	-10	1.4e-08	-7.85305	-11.1953	0.94878	-10	-10	absent
AKS1	ALG1	AKS	ALG	AKS1ALG1	Glycerol	2	-10	1.94e-08	-7.71275	-15.7615	0.596631	-1	-0.0464457	absent
AKS1	ALG1	AKS	ALG	AKS1ALG1	Glycerol	1	-10	7.72e-09	-8.11232	-12.9403	0.596631	-1	-0.0464457	absent
AKS1	ALG1	AKS	ALG	AKS1ALG1	Glucose	1	-10	6.11e-09	-8.21366	-16.7633	0.596631	-0.128884	-0.141619	absent
AKS1	ALG1	AKS	ALG	AKS1ALG1	Glucose	2	-10	1.32e-08	-7.87867	-16.0934	0.596631	-0.128884	-0.141619	absent
AKS1	ALG1	AKS	ALG	AKS1ALG1	UY	1	-10	3.06e-08	-7.51367	-15.3634	0.596631	-10	-10	absent
AKS1	ALG1	AKS	ALG	AKS1ALG1	UY	2	-10	1.4e-08	-7.85305	-16.0421	0.596631	-10	-10	absent
AKS1	ANG1	AKS	ANG	AKS1ANG1	Glycerol	2	-10	1.94e-08	-7.71275	-16.1431	0.926274	-1	-1	absent
AKS1	ANG1	AKS	ANG	AKS1ANG1	Glycerol	1	-10	7.72e-09	-8.11232	-13.3219	0.926274	-1	-1	absent
AKS1	ANG1	AKS	ANG	AKS1ANG1	Glucose	1	-10	6.11e-09	-8.21366	-17.1449	0.926274	-0.128884	0.0663533	absent
AKS1	ANG1	AKS	ANG	AKS1ANG1	Glucose	2	-10	1.32e-08	-7.87867	-16.475	0.926274	-0.128884	0.0663533	absent
AKS1	ANG1	AKS	ANG	AKS1ANG1	UY	1	-10	3.06e-08	-7.51367	-15.745	0.926274	-10	-10	absent
AKS1	ANG1	AKS	ANG	AKS1ANG1	UY	2	-10	1.4e-08	-7.85305	-16.4237	0.926274	-10	-10	absent
AKS1	AIM1	AKS	AIM	AKS1AIM1	Glycerol	2	-10	1.94e-08	-7.71275	-15.9288	0.99895	-1	-10	absent
AKS1	AIM1	AKS	AIM	AKS1AIM1	Glycerol	1	-10	7.72e-09	-8.11232	-13.1076	0.99895	-1	-10	absent
AKS1	AIM1	AKS	AIM	AKS1AIM1	Glucose	1	-10	6.11e-09	-8.21366	-16.9306	0.99895	-0.128884	-10	absent
AKS1	AIM1	AKS	AIM	AKS1AIM1	Glucose	2	-10	1.32e-08	-7.87867	-16.2606	0.99895	-0.128884	-10	absent
AKS1	AIM1	AKS	AIM	AKS1AIM1	UY	1	-10	3.06e-08	-7.51367	-15.5306	0.99895	-10	-10	absent
AKS1	AIM1	AKS	AIM	AKS1AIM1	UY	2	-10	1.4e-08	-7.85305	-16.2094	0.99895	-10	-10	absent
AKS1	AKV1	AKS	AKV	AKS1AKV1	Glycerol	2	-10	1.94e-08	-7.71275	-10.8201	0.948591	-1	-0.0735332	absent
AKS1	AKV1	AKS	AKV	AKS1AKV1	Glycerol	1	-10	1e-06	-5.99838	-7.98806	0.948591	-1	-0.0735332	as_expected
AKS1	AKV1	AKS	AKV	AKS1AKV1	Glucose	1	0.0132102	6.11e-09	-8.21366	-11.4669	0.948591	-0.128884	-0.033945	absent
AKS1	AKV1	AKS	AKV	AKS1AKV1	Glucose	2	0.0132102	1.32e-08	-7.87867	-11.0737	0.948591	-0.128884	-0.033945	absent
AKS1	AKV1	AKS	AKV	AKS1AKV1	UY	1	-10	3.06e-08	-7.51367	-10.7925	0.948591	-10	-10	absent
AKS1	AKV1	AKS	AKV	AKS1AKV1	UY	2	-10	1.4e-08	-7.85305	-11.3817	0.948591	-10	-10	absent
AKS1	BBI1	AKS	BBI	AKS1BBI1	Glycerol	2	-10	1.94e-08	-7.71275	-15.1316	0.950125	-1	-0.0628554	absent
AKS1	BBI1	AKS	BBI	AKS1BBI1	Glycerol	1	-10	7.72e-09	-8.11232	-12.3104	0.950125	-1	-0.0628554	absent
AKS1	BBI1	AKS	BBI	AKS1BBI1	Glucose	1	-10	6.11e-09	-8.21366	-14.3621	0.950125	-0.128884	0.0118567	absent
AKS1	BBI1	AKS	BBI	AKS1BBI1	Glucose	2	-10	1.32e-08	-7.87867	-15.4634	0.950125	-0.128884	0.0118567	absent
AKS1	BBI1	AKS	BBI	AKS1BBI1	UY	1	-10	3.06e-08	-7.51367	-14.7334	0.950125	-10	-10	absent
AKS1	BBI1	AKS	BBI	AKS1BBI1	UY	2	-10	1.4e-08	-7.85305	-15.4122	0.950125	-10	-10	absent
AKS1	BAK1	AKS	BAK	AKS1BAK1	Glycerol	2	-10	1.94e-08	-7.71275	-15.6806	1.30334	-1	-0.00177197	absent
AKS1	BAK1	AKS	BAK	AKS1BAK1	Glycerol	1	-10	7.72e-09	-8.11232	-9.46212	1.30334	-1	-0.00177197	absent
AKS1	BAK1	AKS	BAK	AKS1BAK1	Glucose	1	0.0391915	6.11e-09	-8.21366	-12.6267	1.30334	-0.128884	0.0639478	absent
AKS1	BAK1	AKS	BAK	AKS1BAK1	Glucose	2	0.0391915	1.32e-08	-7.87867	-12.3489	1.30334	-0.128884	0.0639478	absent
AKS1	BAK1	AKS	BAK	AKS1BAK1	UY	1	-10	3.06e-08	-7.51367	-11.6928	1.30334	-10	-10	absent
AKS1	BAK1	AKS	BAK	AKS1BAK1	UY	2	-10	1.4e-08	-7.85305	-11.9268	1.30334	-10	-10	absent
AKS1	BEH1	AKS	BEH	AKS1BEH1	Glycerol	2	-10	1.94e-08	-7.71275	-15.3636	1.11783	-1	-1	absent
AKS1	BEH1	AKS	BEH	AKS1BEH1	Glycerol	1	-10	7.72e-09	-8.11232	-12.5424	1.11783	-1	-1	absent
AKS1	BEH1	AKS	BEH	AKS1BEH1	Glucose	1	-10	6.11e-09	-8.21366	-16.3654	1.11783	-0.128884	-0.0314472	absent
AKS1	BEH1	AKS	BEH	AKS1BEH1	Glucose	2	-10	1.32e-08	-7.87867	-15.6954	1.11783	-0.128884	-0.0314472	absent
AKS1	BEH1	AKS	BEH	AKS1BEH1	UY	1	-10	3.06e-08	-7.51367	-14.9654	1.11783	-10	-10	absent
AKS1	BEH1	AKS	BEH	AKS1BEH1	UY	2	-10	1.4e-08	-7.85305	-15.6442	1.11783	-10	-10	absent
AKS1	BLA1	AKS	BLA	AKS1BLA1	Glycerol	2	-10	1.94e-08	-7.71275	-12.3366	0.951533	-1	-10	absent
AKS1	BLA1	AKS	BLA	AKS1BLA1	Glycerol	1	-10	7.72e-09	-8.11232	-12.6598	0.951533	-1	-10	absent
AKS1	BLA1	AKS	BLA	AKS1BLA1	Glucose	1	-10	6.11e-09	-8.21366	-12.261	0.951533	-0.128884	-10	absent
AKS1	BLA1	AKS	BLA	AKS1BLA1	Glucose	2	-10	1.32e-08	-7.87867	-15.8128	0.951533	-0.128884	-10	absent
AKS1	BLA1	AKS	BLA	AKS1BLA1	UY	1	-10	3.06e-08	-7.51367	-13.3771	0.951533	-10	-10	absent
AKS1	BLA1	AKS	BLA	AKS1BLA1	UY	2	-10	1.4e-08	-7.85305	-12.1291	0.951533	-10	-10	absent
AKS1	BHM1	AKS	BHM	AKS1BHM1	Glycerol	2	-10	1.94e-08	-7.71275	-15.7454	0.954899	-1	-1	absent
AKS1	BHM1	AKS	BHM	AKS1BHM1	Glycerol	1	-10	7.72e-09	-8.11232	-12.9242	0.954899	-1	-1	absent
AKS1	BHM1	AKS	BHM	AKS1BHM1	Glucose	1	-10	6.11e-09	-8.21366	-16.7472	0.954899	-0.128884	-10	absent
AKS1	BHM1	AKS	BHM	AKS1BHM1	Glucose	2	-10	1.32e-08	-7.87867	-16.0772	0.954899	-0.128884	-10	absent
AKS1	BHM1	AKS	BHM	AKS1BHM1	UY	1	-10	3.06e-08	-7.51367	-15.3472	0.954899	-10	-10	absent
AKS1	BHM1	AKS	BHM	AKS1BHM1	UY	2	-10	1.4e-08	-7.85305	-16.026	0.954899	-10	-10	absent
AKS1	BHN1	AKS	BHN	AKS1BHN1	Glycerol	2	-10	1.94e-08	-7.71275	-11.7109	0.953875	-1	-1	absent
AKS1	BHN1	AKS	BHN	AKS1BHN1	Glycerol	1	-10	1.16e-06	-5.93623	-8.42865	0.953875	-1	-1	as_expected
AKS1	BHN1	AKS	BHN	AKS1BHN1	Glucose	1	-10	6.11e-09	-8.21366	-11.8721	0.953875	-0.128884	-1	absent
AKS1	BHN1	AKS	BHN	AKS1BHN1	Glucose	2	-10	1.32e-08	-7.87867	-11.3921	0.953875	-0.128884	-1	absent
AKS1	BHN1	AKS	BHN	AKS1BHN1	UY	1	-10	3.06e-08	-7.51367	-11.2007	0.953875	-10	-10	absent
AKS1	BHN1	AKS	BHN	AKS1BHN1	UY	2	-10	1.4e-08	-7.85305	-12.1039	0.953875	-10	-10	absent
AKS1	BHB1	AKS	BHB	AKS1BHB1	Glycerol	2	-10	1.94e-08	-7.71275	-11.5456	0.984209	-1	-10	absent
AKS1	BHB1	AKS	BHB	AKS1BHB1	Glycerol	1	-10	7.72e-09	-8.11232	-8.40673	0.984209	-1	-10	absent
AKS1	BHB1	AKS	BHB	AKS1BHB1	Glucose	1	-0.103133	6.11e-09	-8.21366	-11.1874	0.984209	-0.128884	-10	absent
AKS1	BHB1	AKS	BHB	AKS1BHB1	Glucose	2	-0.103133	1.32e-08	-7.87867	-10.9557	0.984209	-0.128884	-10	absent
AKS1	BHB1	AKS	BHB	AKS1BHB1	UY	1	-10	3.06e-08	-7.51367	-10.5861	0.984209	-10	-10	absent
AKS1	BHB1	AKS	BHB	AKS1BHB1	UY	2	-10	1.4e-08	-7.85305	-12.4287	0.984209	-10	-10	absent
AKS1	BLE1	AKS	BLE	AKS1BLE1	Glycerol	2	-1	1.94e-08	-7.71275	-10.8551	0.955482	-1	-0.044381	absent
AKS1	BLE1	AKS	BLE	AKS1BLE1	Glycerol	1	-1	0.00164706	-2.78329	-7.56795	0.955482	-1	-0.044381	over_represented
AKS1	BLE1	AKS	BLE	AKS1BLE1	Glucose	1	0.0114058	6.11e-09	-8.21366	-11.7293	0.955482	-0.128884	-0.0748489	absent
AKS1	BLE1	AKS	BLE	AKS1BLE1	Glucose	2	0.0114058	1.32e-08	-7.87867	-11.4024	0.955482	-0.128884	-0.0748489	absent
AKS1	BLE1	AKS	BLE	AKS1BLE1	UY	1	-10	3.06e-08	-7.51367	-10.9318	0.955482	-10	-10	absent
AKS1	BLE1	AKS	BLE	AKS1BLE1	UY	2	-10	1.4e-08	-7.85305	-11.0992	0.955482	-10	-10	absent
AKS1	BHF1	AKS	BHF	AKS1BHF1	Glycerol	2	-1	1.94e-08	-7.71275	-12.3871	0.944058	-1	0.0945635	absent
AKS1	BHF1	AKS	BHF	AKS1BHF1	Glycerol	1	-1	7.72e-09	-8.11232	-12.7543	0.944058	-1	0.0945635	absent
AKS1	BHF1	AKS	BHF	AKS1BHF1	Glucose	1	-0.0218658	6.11e-09	-8.21366	-12.0643	0.944058	-0.128884	0.0612509	absent
AKS1	BHF1	AKS	BHF	AKS1BHF1	Glucose	2	-0.0218658	1.32e-08	-7.87867	-12.0311	0.944058	-0.128884	0.0612509	absent
AKS1	BHF1	AKS	BHF	AKS1BHF1	UY	1	-10	3.06e-08	-7.51367	-11.0624	0.944058	-10	-10	absent
AKS1	BHF1	AKS	BHF	AKS1BHF1	UY	2	-10	1.4e-08	-7.85305	-15.8561	0.944058	-10	-10	absent
AKS1	BKR1	AKS	BKR	AKS1BKR1	Glycerol	2	-10	1.94e-08	-7.71275	-11.8	0.956975	-1	-1	absent
AKS1	BKR1	AKS	BKR	AKS1BKR1	Glycerol	1	-10	8.49e-07	-6.07093	-8.41839	0.956975	-1	-1	as_expected
AKS1	BKR1	AKS	BKR	AKS1BKR1	Glucose	1	-10	6.11e-09	-8.21366	-12.2189	0.956975	-0.128884	-0.013402	absent
AKS1	BKR1	AKS	BKR	AKS1BKR1	Glucose	2	-10	1.32e-08	-7.87867	-11.5257	0.956975	-0.128884	-0.013402	absent
AKS1	BKR1	AKS	BKR	AKS1BKR1	UY	1	-10	3.06e-08	-7.51367	-10.9983	0.956975	-10	-10	absent
AKS1	BKR1	AKS	BKR	AKS1BKR1	UY	2	-10	1.4e-08	-7.85305	-11.6278	0.956975	-10	-10	absent
AKS1	BLL1	AKS	BLL	AKS1BLL1	Glycerol	2	-0.0469165	1.94e-08	-7.71275	-11.8562	0.956111	-1	0.120353	absent
AKS1	BLL1	AKS	BLL	AKS1BLL1	Glycerol	1	-0.0469165	7.72e-09	-8.11232	-9.19981	0.956111	-1	0.120353	absent
AKS1	BLL1	AKS	BLL	AKS1BLL1	Glucose	1	-10	6.11e-09	-8.21366	-11.9048	0.956111	-0.128884	-1	absent
AKS1	BLL1	AKS	BLL	AKS1BLL1	Glucose	2	-10	1.32e-08	-7.87867	-11.8332	0.956111	-0.128884	-1	absent
AKS1	BLL1	AKS	BLL	AKS1BLL1	UY	1	-10	3.06e-08	-7.51367	-10.8519	0.956111	-10	-10	absent
AKS1	BLL1	AKS	BLL	AKS1BLL1	UY	2	-10	1.4e-08	-7.85305	-12.0965	0.956111	-10	-10	absent
AKS1	BNI1	AKS	BNI	AKS1BNI1	Glycerol	2	-10	1.94e-08	-7.71275	-12.1529	0.95803	-1	-10	absent
AKS1	BNI1	AKS	BNI	AKS1BNI1	Glycerol	1	-10	7.72e-09	-8.11232	-9.91703	0.95803	-1	-10	absent
AKS1	BNI1	AKS	BNI	AKS1BNI1	Glucose	1	-10	6.11e-09	-8.21366	-12.8766	0.95803	-0.128884	-10	absent
AKS1	BNI1	AKS	BNI	AKS1BNI1	Glucose	2	-10	1.32e-08	-7.87867	-12.8605	0.95803	-0.128884	-10	absent
AKS1	BNI1	AKS	BNI	AKS1BNI1	UY	1	-10	3.06e-08	-7.51367	-15.3324	0.95803	-10	-10	absent
AKS1	BNI1	AKS	BNI	AKS1BNI1	UY	2	-10	1.4e-08	-7.85305	-16.0111	0.95803	-10	-10	absent
AKS1	BQG1	AKS	BQG	AKS1BQG1	Glycerol	2	-0.0457363	1.94e-08	-7.71275	-11.4936	0.954279	-1	0.0537228	absent
AKS1	BQG1	AKS	BQG	AKS1BQG1	Glycerol	1	-0.0457363	7.72e-09	-8.11232	-8.55072	0.954279	-1	0.0537228	absent
AKS1	BQG1	AKS	BQG	AKS1BQG1	Glucose	1	0.0355784	6.11e-09	-8.21366	-12.0683	0.954279	-0.128884	-0.0571925	absent
AKS1	BQG1	AKS	BQG	AKS1BQG1	Glucose	2	0.0355784	1.32e-08	-7.87867	-11.6415	0.954279	-0.128884	-0.0571925	absent
AKS1	BQG1	AKS	BQG	AKS1BQG1	UY	1	-10	3.06e-08	-7.51367	-10.6904	0.954279	-10	-10	absent
AKS1	BQG1	AKS	BQG	AKS1BQG1	UY	2	-10	1.4e-08	-7.85305	-11.6913	0.954279	-10	-10	absent
AKS1	BNK1	AKS	BNK	AKS1BNK1	Glycerol	2	-0.0732202	1.94e-08	-7.71275	-11.1997	0.954418	-1	0.115878	absent
AKS1	BNK1	AKS	BNK	AKS1BNK1	Glycerol	1	-0.0732202	1.31e-06	-5.88187	-7.92903	0.954418	-1	0.115878	as_expected
AKS1	BNK1	AKS	BNK	AKS1BNK1	Glucose	1	-0.0183274	6.11e-09	-8.21366	-11.5749	0.954418	-0.128884	-0.0796816	absent
AKS1	BNK1	AKS	BNK	AKS1BNK1	Glucose	2	-0.0183274	1.32e-08	-7.87867	-11.4582	0.954418	-0.128884	-0.0796816	absent
AKS1	BNK1	AKS	BNK	AKS1BNK1	UY	1	-10	3.06e-08	-7.51367	-10.6032	0.954418	-10	-10	absent
AKS1	BNK1	AKS	BNK	AKS1BNK1	UY	2	-10	1.4e-08	-7.85305	-11.4175	0.954418	-10	-10	absent
AKS1	BPQ1	AKS	BPQ	AKS1BPQ1	Glycerol	2	-0.084606	1.94e-08	-7.71275	-11.2531	0.950393	-1	0.0632255	absent
AKS1	BPQ1	AKS	BPQ	AKS1BPQ1	Glycerol	1	-0.084606	3.32e-06	-5.47885	-7.81665	0.950393	-1	0.0632255	as_expected
AKS1	BPQ1	AKS	BPQ	AKS1BPQ1	Glucose	1	-0.0121428	6.11e-09	-8.21366	-11.8293	0.950393	-0.128884	0.00714221	absent
AKS1	BPQ1	AKS	BPQ	AKS1BPQ1	Glucose	2	-0.0121428	1.32e-08	-7.87867	-11.5268	0.950393	-0.128884	0.00714221	absent
AKS1	BPQ1	AKS	BPQ	AKS1BPQ1	UY	1	-10	3.06e-08	-7.51367	-11.1717	0.950393	-10	-10	absent
AKS1	BPQ1	AKS	BPQ	AKS1BPQ1	UY	2	-10	1.4e-08	-7.85305	-11.2625	0.950393	-10	-10	absent
AKS1	BQH1	AKS	BQH	AKS1BQH1	Glycerol	2	-10	1.94e-08	-7.71275	-16.1252	0.957599	-1	-1	absent
AKS1	BQH1	AKS	BQH	AKS1BQH1	Glycerol	1	-10	7.72e-09	-8.11232	-13.304	0.957599	-1	-1	absent
AKS1	BQH1	AKS	BQH	AKS1BQH1	Glucose	1	-0.14541	6.11e-09	-8.21366	-13.6875	0.957599	-0.128884	0.0201877	absent
AKS1	BQH1	AKS	BQH	AKS1BQH1	Glucose	2	-0.14541	1.32e-08	-7.87867	-16.457	0.957599	-0.128884	0.0201877	absent
AKS1	BQH1	AKS	BQH	AKS1BQH1	UY	1	-10	3.06e-08	-7.51367	-15.727	0.957599	-10	-10	absent
AKS1	BQH1	AKS	BQH	AKS1BQH1	UY	2	-10	1.4e-08	-7.85305	-16.4058	0.957599	-10	-10	absent
AKS1	BRA1	AKS	BRA	AKS1BRA1	Glycerol	2	-10	1.94e-08	-7.71275	-11.0951	0.956634	-1	-1	absent
AKS1	BRA1	AKS	BRA	AKS1BRA1	Glycerol	1	-10	2.24e-06	-5.64992	-8.03818	0.956634	-1	-1	as_expected
AKS1	BRA1	AKS	BRA	AKS1BRA1	Glucose	1	0.0315811	6.11e-09	-8.21366	-11.8369	0.956634	-0.128884	-0.0988197	absent
AKS1	BRA1	AKS	BRA	AKS1BRA1	Glucose	2	0.0315811	1.32e-08	-7.87867	-11.3626	0.956634	-0.128884	-0.0988197	absent
AKS1	BRA1	AKS	BRA	AKS1BRA1	UY	1	-10	3.06e-08	-7.51367	-11.0966	0.956634	-10	-10	absent
AKS1	BRA1	AKS	BRA	AKS1BRA1	UY	2	-10	1.4e-08	-7.85305	-11.807	0.956634	-10	-10	absent
AKS1	BLN1	AKS	BLN	AKS1BLN1	Glycerol	2	-10	1.94e-08	-7.71275	-15.6114	0.954816	-1	-10	absent
AKS1	BLN1	AKS	BLN	AKS1BLN1	Glycerol	1	-10	7.72e-09	-8.11232	-12.7902	0.954816	-1	-10	absent
AKS1	BLN1	AKS	BLN	AKS1BLN1	Glucose	1	-10	6.11e-09	-8.21366	-12.8777	0.954816	-0.128884	-10	absent
AKS1	BLN1	AKS	BLN	AKS1BLN1	Glucose	2	-10	1.32e-08	-7.87867	-12.4509	0.954816	-0.128884	-10	absent
AKS1	BLN1	AKS	BLN	AKS1BLN1	UY	1	-10	3.06e-08	-7.51367	-15.2133	0.954816	-10	-10	absent
AKS1	BLN1	AKS	BLN	AKS1BLN1	UY	2	-10	1.4e-08	-7.85305	-12.0862	0.954816	-10	-10	absent
AKS1	BQI1	AKS	BQI	AKS1BQI1	Glycerol	2	-10	1.94e-08	-7.71275	-15.7776	0.955139	-1	-0.01173	absent
AKS1	BQI1	AKS	BQI	AKS1BQI1	Glycerol	1	-10	7.72e-09	-8.11232	-9.43007	0.955139	-1	-0.01173	absent
AKS1	BQI1	AKS	BQI	AKS1BQI1	Glucose	1	0.00289888	6.11e-09	-8.21366	-13.4811	0.955139	-0.128884	-0.108288	absent
AKS1	BQI1	AKS	BQI	AKS1BQI1	Glucose	2	0.00289888	1.32e-08	-7.87867	-12.8676	0.955139	-0.128884	-0.108288	absent
AKS1	BQI1	AKS	BQI	AKS1BQI1	UY	1	-10	3.06e-08	-7.51367	-11.477	0.955139	-10	-10	absent
AKS1	BQI1	AKS	BQI	AKS1BQI1	UY	2	-10	1.4e-08	-7.85305	-11.7877	0.955139	-10	-10	absent
AKS1	BRB1	AKS	BRB	AKS1BRB1	Glycerol	2	-0.0552255	1.94e-08	-7.71275	-11.5265	0.96181	-1	0.000627839	absent
AKS1	BRB1	AKS	BRB	AKS1BRB1	Glycerol	1	-0.0552255	7.72e-09	-8.11232	-8.73191	0.96181	-1	0.000627839	absent
AKS1	BRB1	AKS	BRB	AKS1BRB1	Glucose	1	-0.00544065	6.11e-09	-8.21366	-11.1994	0.96181	-0.128884	0.0350566	absent
AKS1	BRB1	AKS	BRB	AKS1BRB1	Glucose	2	-0.00544065	1.32e-08	-7.87867	-10.8223	0.96181	-0.128884	0.0350566	absent
AKS1	BRB1	AKS	BRB	AKS1BRB1	UY	1	-10	3.06e-08	-7.51367	-10.7166	0.96181	-10	-10	absent
AKS1	BRB1	AKS	BRB	AKS1BRB1	UY	2	-10	1.4e-08	-7.85305	-11.6998	0.96181	-10	-10	absent
AKS1	BLP1	AKS	BLP	AKS1BLP1	Glycerol	2	0.0199621	1.94e-08	-7.71275	-15.6942	0.955244	-1	0.0191829	absent
AKS1	BLP1	AKS	BLP	AKS1BLP1	Glycerol	1	0.0199621	7.72e-09	-8.11232	-9.15109	0.955244	-1	0.0191829	absent
AKS1	BLP1	AKS	BLP	AKS1BLP1	Glucose	1	-10	6.11e-09	-8.21366	-16.696	0.955244	-0.128884	0.0477277	absent
AKS1	BLP1	AKS	BLP	AKS1BLP1	Glucose	2	-10	1.32e-08	-7.87867	-16.026	0.955244	-0.128884	0.0477277	absent
AKS1	BLP1	AKS	BLP	AKS1BLP1	UY	1	-10	3.06e-08	-7.51367	-15.296	0.955244	-10	-10	absent
AKS1	BLP1	AKS	BLP	AKS1BLP1	UY	2	-10	1.4e-08	-7.85305	-15.9748	0.955244	-10	-10	absent
AKS1	BRC1	AKS	BRC	AKS1BRC1	Glycerol	2	-10	1.94e-08	-7.71275	-11.1603	0.947301	-1	-0.0845599	absent
AKS1	BRC1	AKS	BRC	AKS1BRC1	Glycerol	1	-10	1.7e-06	-5.7699	-7.74761	0.947301	-1	-0.0845599	as_expected
AKS1	BRC1	AKS	BRC	AKS1BRC1	Glucose	1	-0.0768537	6.11e-09	-8.21366	-11.3635	0.947301	-0.128884	-0.0843597	absent
AKS1	BRC1	AKS	BRC	AKS1BRC1	Glucose	2	-0.0768537	1.32e-08	-7.87867	-11.1547	0.947301	-0.128884	-0.0843597	absent
AKS1	BRC1	AKS	BRC	AKS1BRC1	UY	1	-10	3.06e-08	-7.51367	-11.8154	0.947301	-10	-10	absent
AKS1	BRC1	AKS	BRC	AKS1BRC1	UY	2	-10	1.4e-08	-7.85305	-11.394	0.947301	-10	-10	absent
AKS1	BPT1	AKS	BPT	AKS1BPT1	Glycerol	2	-10	1.94e-08	-7.71275	-11.6781	0.950775	-1	0.0527905	absent
AKS1	BPT1	AKS	BPT	AKS1BPT1	Glycerol	1	-10	1.54e-06	-5.81129	-8.13984	0.950775	-1	0.0527905	as_expected
AKS1	BPT1	AKS	BPT	AKS1BPT1	Glucose	1	-0.0560655	6.11e-09	-8.21366	-12.1526	0.950775	-0.128884	-0.0226414	absent
AKS1	BPT1	AKS	BPT	AKS1BPT1	Glucose	2	-0.0560655	1.32e-08	-7.87867	-11.8869	0.950775	-0.128884	-0.0226414	absent
AKS1	BPT1	AKS	BPT	AKS1BPT1	UY	1	-10	3.06e-08	-7.51367	-11.0899	0.950775	-10	-10	absent
AKS1	BPT1	AKS	BPT	AKS1BPT1	UY	2	-10	1.4e-08	-7.85305	-11.6719	0.950775	-10	-10	absent
AKS1	BRD1	AKS	BRD	AKS1BRD1	Glycerol	2	-1	1.94e-08	-7.71275	-15.6581	0.949134	-1	0.10436	absent
AKS1	BRD1	AKS	BRD	AKS1BRD1	Glycerol	1	-1	7.72e-09	-8.11232	-8.99278	0.949134	-1	0.10436	absent
AKS1	BRD1	AKS	BRD	AKS1BRD1	Glucose	1	0.0204327	6.11e-09	-8.21366	-11.75	0.949134	-0.128884	-0.0248454	absent
AKS1	BRD1	AKS	BRD	AKS1BRD1	Glucose	2	0.0204327	1.32e-08	-7.87867	-11.4176	0.949134	-0.128884	-0.0248454	absent
AKS1	BRD1	AKS	BRD	AKS1BRD1	UY	1	-10	3.06e-08	-7.51367	-11.5674	0.949134	-10	-10	absent
AKS1	BRD1	AKS	BRD	AKS1BRD1	UY	2	-10	1.4e-08	-7.85305	-12.2527	0.949134	-10	-10	absent
AKS1	BMK1	AKS	BMK	AKS1BMK1	Glycerol	2	-10	1.94e-08	-7.71275	-12.2212	0.952322	-1	0.0727937	absent
AKS1	BMK1	AKS	BMK	AKS1BMK1	Glycerol	1	-10	7.72e-09	-8.11232	-12.5755	0.952322	-1	0.0727937	absent
AKS1	BMK1	AKS	BMK	AKS1BMK1	Glucose	1	-0.0311201	6.11e-09	-8.21366	-11.6899	0.952322	-0.128884	0.0206207	absent
AKS1	BMK1	AKS	BMK	AKS1BMK1	Glucose	2	-0.0311201	1.32e-08	-7.87867	-11.4043	0.952322	-0.128884	0.0206207	absent
AKS1	BMK1	AKS	BMK	AKS1BMK1	UY	1	-10	3.06e-08	-7.51367	-10.9594	0.952322	-10	-10	absent
AKS1	BMK1	AKS	BMK	AKS1BMK1	UY	2	-10	1.4e-08	-7.85305	-12.2943	0.952322	-10	-10	absent
AKS1	BQP1	AKS	BQP	AKS1BQP1	Glycerol	2	-10	1.94e-08	-7.71275	-15.5316	0.952448	-1	-0.0301991	absent
AKS1	BQP1	AKS	BQP	AKS1BQP1	Glycerol	1	-10	7.72e-09	-8.11232	-8.81429	0.952448	-1	-0.0301991	absent
AKS1	BQP1	AKS	BQP	AKS1BQP1	Glucose	1	-0.0826761	6.11e-09	-8.21366	-11.6367	0.952448	-0.128884	0.0119541	absent
AKS1	BQP1	AKS	BQP	AKS1BQP1	Glucose	2	-0.0826761	1.32e-08	-7.87867	-11.1545	0.952448	-0.128884	0.0119541	absent
AKS1	BQP1	AKS	BQP	AKS1BQP1	UY	1	-10	3.06e-08	-7.51367	-11.4284	0.952448	-10	-10	absent
AKS1	BQP1	AKS	BQP	AKS1BQP1	UY	2	-10	1.4e-08	-7.85305	-15.8122	0.952448	-10	-10	absent
AKS1	BLV1	AKS	BLV	AKS1BLV1	Glycerol	2	0.0230867	1.94e-08	-7.71275	-11.9973	0.954226	-1	0.0838921	absent
AKS1	BLV1	AKS	BLV	AKS1BLV1	Glycerol	1	0.0230867	7.72e-09	-8.11232	-9.50888	0.954226	-1	0.0838921	absent
AKS1	BLV1	AKS	BLV	AKS1BLV1	Glucose	1	-0.132949	6.11e-09	-8.21366	-13.1546	0.954226	-0.128884	-0.0681483	absent
AKS1	BLV1	AKS	BLV	AKS1BLV1	Glucose	2	-0.132949	1.32e-08	-7.87867	-12.3234	0.954226	-0.128884	-0.0681483	absent
AKS1	BLV1	AKS	BLV	AKS1BLV1	UY	1	-10	3.06e-08	-7.51367	-15.2163	0.954226	-10	-10	absent
AKS1	BLV1	AKS	BLV	AKS1BLV1	UY	2	-10	1.4e-08	-7.85305	-15.8951	0.954226	-10	-10	absent
AKS1	BQQ1	AKS	BQQ	AKS1BQQ1	Glycerol	2	-10	1.94e-08	-7.71275	-16.1027	0.95358	-1	0.0824425	absent
AKS1	BQQ1	AKS	BQQ	AKS1BQQ1	Glycerol	1	-10	7.72e-09	-8.11232	-13.2815	0.95358	-1	0.0824425	absent
AKS1	BQQ1	AKS	BQQ	AKS1BQQ1	Glucose	1	-10	6.11e-09	-8.21366	-13.653	0.95358	-0.128884	0.0291802	absent
AKS1	BQQ1	AKS	BQQ	AKS1BQQ1	Glucose	2	-10	1.32e-08	-7.87867	-16.4345	0.95358	-0.128884	0.0291802	absent
AKS1	BQQ1	AKS	BQQ	AKS1BQQ1	UY	1	-10	3.06e-08	-7.51367	-15.7045	0.95358	-10	-10	absent
AKS1	BQQ1	AKS	BQQ	AKS1BQQ1	UY	2	-10	1.4e-08	-7.85305	-16.3833	0.95358	-10	-10	absent
AKS1	BMA1	AKS	BMA	AKS1BMA1	Glycerol	2	-10	1.94e-08	-7.71275	-11.8646	1.3215	-1	0.0885346	absent
AKS1	BMA1	AKS	BMA	AKS1BMA1	Glycerol	1	-10	7.72e-09	-8.11232	-12.7409	1.3215	-1	0.0885346	absent
AKS1	BMA1	AKS	BMA	AKS1BMA1	Glucose	1	-1	6.11e-09	-8.21366	-12.2015	1.3215	-0.128884	0.0277247	absent
AKS1	BMA1	AKS	BMA	AKS1BMA1	Glucose	2	-1	1.32e-08	-7.87867	-11.8926	1.3215	-0.128884	0.0277247	absent
AKS1	BMA1	AKS	BMA	AKS1BMA1	UY	1	-10	3.06e-08	-7.51367	-15.1639	1.3215	-10	-10	absent
AKS1	BMA1	AKS	BMA	AKS1BMA1	UY	2	-10	1.4e-08	-7.85305	-11.8277	1.3215	-10	-10	absent
AKS1	BQR1	AKS	BQR	AKS1BQR1	Glycerol	2	-1	1.94e-08	-7.71275	-11.6236	0.950601	-1	0.0588489	absent
AKS1	BQR1	AKS	BQR	AKS1BQR1	Glycerol	1	-1	7.72e-09	-8.11232	-8.58674	0.950601	-1	0.0588489	absent
AKS1	BQR1	AKS	BQR	AKS1BQR1	Glucose	1	0.0511136	6.11e-09	-8.21366	-12.9361	0.950601	-0.128884	-0.0545715	absent
AKS1	BQR1	AKS	BQR	AKS1BQR1	Glucose	2	0.0511136	1.32e-08	-7.87867	-11.8319	0.950601	-0.128884	-0.0545715	absent
AKS1	BQR1	AKS	BQR	AKS1BQR1	UY	1	-10	3.06e-08	-7.51367	-11.0763	0.950601	-10	-10	absent
AKS1	BQR1	AKS	BQR	AKS1BQR1	UY	2	-10	1.4e-08	-7.85305	-11.7025	0.950601	-10	-10	absent
AKS1	CAD1	AKS	CAD	AKS1CAD1	Glycerol	2	-10	1.94e-08	-7.71275	-15.281	1.02684	-1	-10	absent
AKS1	CAD1	AKS	CAD	AKS1CAD1	Glycerol	1	-10	7.72e-09	-8.11232	-12.4598	1.02684	-1	-10	absent
AKS1	CAD1	AKS	CAD	AKS1CAD1	Glucose	1	-10	6.11e-09	-8.21366	-16.2828	1.02684	-0.128884	-0.0194773	absent
AKS1	CAD1	AKS	CAD	AKS1CAD1	Glucose	2	-10	1.32e-08	-7.87867	-15.6128	1.02684	-0.128884	-0.0194773	absent
AKS1	CAD1	AKS	CAD	AKS1CAD1	UY	1	-10	3.06e-08	-7.51367	-14.8828	1.02684	-10	-10	absent
AKS1	CAD1	AKS	CAD	AKS1CAD1	UY	2	-10	1.4e-08	-7.85305	-15.5616	1.02684	-10	-10	absent
AKS1	BSB1	AKS	BSB	AKS1BSB1	Glycerol	2	-10	1.94e-08	-7.71275	-16.5475	0.946489	-1	-10	absent
AKS1	BSB1	AKS	BSB	AKS1BSB1	Glycerol	1	-10	7.72e-09	-8.11232	-13.7263	0.946489	-1	-10	absent
AKS1	BSB1	AKS	BSB	AKS1BSB1	Glucose	1	-10	6.11e-09	-8.21366	-13.3295	0.946489	-0.128884	-10	absent
AKS1	BSB1	AKS	BSB	AKS1BSB1	Glucose	2	-10	1.32e-08	-7.87867	-13.8054	0.946489	-0.128884	-10	absent
AKS1	BSB1	AKS	BSB	AKS1BSB1	UY	1	-10	3.06e-08	-7.51367	-16.1494	0.946489	-10	-10	absent
AKS1	BSB1	AKS	BSB	AKS1BSB1	UY	2	-10	1.4e-08	-7.85305	-16.8281	0.946489	-10	-10	absent
AKS1	BTH1	AKS	BTH	AKS1BTH1	Glycerol	2	-10	1.94e-08	-7.71275	-10.63	0.946711	-1	-1	absent
AKS1	BTH1	AKS	BTH	AKS1BTH1	Glycerol	1	-10	9.34e-06	-5.02954	-7.27864	0.946711	-1	-1	as_expected
AKS1	BTH1	AKS	BTH	AKS1BTH1	Glucose	1	-10	6.11e-09	-8.21366	-11.6725	0.946711	-0.128884	-0.01391	absent
AKS1	BTH1	AKS	BTH	AKS1BTH1	Glucose	2	-10	1.32e-08	-7.87867	-11.3158	0.946711	-0.128884	-0.01391	absent
AKS1	BTH1	AKS	BTH	AKS1BTH1	UY	1	-10	3.06e-08	-7.51367	-11.1043	0.946711	-10	-10	absent
AKS1	BTH1	AKS	BTH	AKS1BTH1	UY	2	-10	1.4e-08	-7.85305	-10.6425	0.946711	-10	-10	absent
AKS1	AHP1	AKS	AHP	AKS1AHP1	Glycerol	2	-10	1.94e-08	-7.71275	-15.5925	1.03342	-1	0.0888156	absent
AKS1	AHP1	AKS	AHP	AKS1AHP1	Glycerol	1	-10	7.72e-09	-8.11232	-12.7713	1.03342	-1	0.0888156	absent
AKS1	AHP1	AKS	AHP	AKS1AHP1	Glucose	1	-10	6.11e-09	-8.21366	-16.5943	1.03342	-0.128884	-1	absent
AKS1	AHP1	AKS	AHP	AKS1AHP1	Glucose	2	-10	1.32e-08	-7.87867	-15.9243	1.03342	-0.128884	-1	absent
AKS1	AHP1	AKS	AHP	AKS1AHP1	UY	1	-10	3.06e-08	-7.51367	-15.1943	1.03342	-10	-10	absent
AKS1	AHP1	AKS	AHP	AKS1AHP1	UY	2	-10	1.4e-08	-7.85305	-15.8731	1.03342	-10	-10	absent
AKS1	CQD1	AKS	CQD	AKS1CQD1	Glycerol	2	-10	1.94e-08	-7.71275	-12.2926	1.00344	-1	-10	absent
AKS1	CQD1	AKS	CQD	AKS1CQD1	Glycerol	1	-10	7.72e-09	-8.11232	-9.01007	1.00344	-1	-10	absent
AKS1	CQD1	AKS	CQD	AKS1CQD1	Glucose	1	-1	6.11e-09	-8.21366	-12.6966	1.00344	-0.128884	0.0106465	absent
AKS1	CQD1	AKS	CQD	AKS1CQD1	Glucose	2	-1	1.32e-08	-7.87867	-12.1119	1.00344	-0.128884	0.0106465	absent
AKS1	CQD1	AKS	CQD	AKS1CQD1	UY	1	-10	3.06e-08	-7.51367	-15.4703	1.00344	-10	-10	absent
AKS1	CQD1	AKS	CQD	AKS1CQD1	UY	2	-10	1.4e-08	-7.85305	-16.1491	1.00344	-10	-10	absent
AKS1	APV1	AKS	APV	AKS1APV1	Glycerol	2	-0.0280566	1.94e-08	-7.71275	-10.9303	0.950366	-1	0.176787	absent
AKS1	APV1	AKS	APV	AKS1APV1	Glycerol	1	-0.0280566	9.27e-07	-6.03314	-7.74233	0.950366	-1	0.176787	as_expected
AKS1	APV1	AKS	APV	AKS1APV1	Glucose	1	-10	6.11e-09	-8.21366	-12.1555	0.950366	-0.128884	-0.0613302	absent
AKS1	APV1	AKS	APV	AKS1APV1	Glucose	2	-10	1.32e-08	-7.87867	-11.6353	0.950366	-0.128884	-0.0613302	absent
AKS1	APV1	AKS	APV	AKS1APV1	UY	1	-10	3.06e-08	-7.51367	-10.6815	0.950366	-10	-10	absent
AKS1	APV1	AKS	APV	AKS1APV1	UY	2	-10	1.4e-08	-7.85305	-11.4429	0.950366	-10	-10	absent
AKS1	AST1	AKS	AST	AKS1AST1	Glycerol	2	-10	1.94e-08	-7.71275	-11.2032	0.916644	-1	-1	absent
AKS1	AST1	AKS	AST	AKS1AST1	Glycerol	1	-10	2.93e-06	-5.53254	-7.99358	0.916644	-1	-1	as_expected
AKS1	AST1	AKS	AST	AKS1AST1	Glucose	1	-0.0562502	6.11e-09	-8.21366	-12.0893	0.916644	-0.128884	0.0143308	absent
AKS1	AST1	AKS	AST	AKS1AST1	Glucose	2	-0.0562502	1.32e-08	-7.87867	-11.7803	0.916644	-0.128884	0.0143308	absent
AKS1	AST1	AKS	AST	AKS1AST1	UY	1	-10	3.06e-08	-7.51367	-11.5155	0.916644	-10	-10	absent
AKS1	AST1	AKS	AST	AKS1AST1	UY	2	-10	1.4e-08	-7.85305	-11.2218	0.916644	-10	-10	absent
AKS1	CCV1	AKS	CCV	AKS1CCV1	Glycerol	2	-10	1.94e-08	-7.71275	-11.0457	1.11708	-1	-1	absent
AKS1	CCV1	AKS	CCV	AKS1CCV1	Glycerol	1	-10	7.72e-09	-8.11232	-8.14062	1.11708	-1	-1	absent
AKS1	CCV1	AKS	CCV	AKS1CCV1	Glucose	1	-10	6.11e-09	-8.21366	-12.2026	1.11708	-0.128884	0.044604	absent
AKS1	CCV1	AKS	CCV	AKS1CCV1	Glucose	2	-10	1.32e-08	-7.87867	-11.5065	1.11708	-0.128884	0.044604	absent
AKS1	CCV1	AKS	CCV	AKS1CCV1	UY	1	-10	3.06e-08	-7.51367	-11.4498	1.11708	-10	-10	absent
AKS1	CCV1	AKS	CCV	AKS1CCV1	UY	2	-10	1.4e-08	-7.85305	-11.1507	1.11708	-10	-10	absent
AKS1	YAR1	AKS	YAR	AKS1YAR1	Glycerol	2	-10	1.94e-08	-7.71275	-15.8304	0.976454	-1	-1	absent
AKS1	YAR1	AKS	YAR	AKS1YAR1	Glycerol	1	-10	7.72e-09	-8.11232	-13.0092	0.976454	-1	-1	absent
AKS1	YAR1	AKS	YAR	AKS1YAR1	Glucose	1	-0.0478589	6.11e-09	-8.21366	-12.5854	0.976454	-0.128884	-0.0705407	absent
AKS1	YAR1	AKS	YAR	AKS1YAR1	Glucose	2	-0.0478589	1.32e-08	-7.87867	-12.3081	0.976454	-0.128884	-0.0705407	absent
AKS1	YAR1	AKS	YAR	AKS1YAR1	UY	1	-10	3.06e-08	-7.51367	-11.7737	0.976454	-10	-10	absent
AKS1	YAR1	AKS	YAR	AKS1YAR1	UY	2	-10	1.4e-08	-7.85305	-16.111	0.976454	-10	-10	absent
AKS1	YBU1	AKS	YBU	AKS1YBU1	Glycerol	2	-10	1.94e-08	-7.71275	-11.1082	1.13035	-1	-1	absent
AKS1	YBU1	AKS	YBU	AKS1YBU1	Glycerol	1	-10	1.31e-06	-5.88187	-8.04025	1.13035	-1	-1	as_expected
AKS1	YBU1	AKS	YBU	AKS1YBU1	Glucose	1	-10	6.11e-09	-8.21366	-16.6046	1.13035	-0.128884	-10	absent
AKS1	YBU1	AKS	YBU	AKS1YBU1	Glucose	2	-10	1.32e-08	-7.87867	-15.9346	1.13035	-0.128884	-10	absent
AKS1	YBU1	AKS	YBU	AKS1YBU1	UY	1	-10	3.06e-08	-7.51367	-15.2046	1.13035	-10	-10	absent
AKS1	YBU1	AKS	YBU	AKS1YBU1	UY	2	-10	1.4e-08	-7.85305	-11.2485	1.13035	-10	-10	absent
AKG1	AKB1	AKG	AKB	AKG1AKB1	Glycerol	2	-10	3.29e-06	-5.4823	-7.49512	0.42769	-10	-1	as_expected
AKG1	AKB1	AKG	AKB	AKG1AKB1	Glycerol	1	-10	7.72e-09	-8.11232	-8.55942	0.42769	-10	-1	absent
AKG1	AKB1	AKG	AKB	AKG1AKB1	Glucose	1	-10	6.11e-09	-8.21366	-8.37552	0.42769	-1	-0.0154866	absent
AKG1	AKB1	AKG	AKB	AKG1AKB1	Glucose	2	-10	1.32e-08	-7.87867	-8.65991	0.42769	-1	-0.0154866	absent
AKG1	AKB1	AKG	AKB	AKG1AKB1	UY	1	-10	3.06e-08	-7.51367	-11.5241	0.42769	-10	-10	absent
AKG1	AKB1	AKG	AKB	AKG1AKB1	UY	2	-10	0.00305709	-2.51469	-7.69445	0.42769	-10	-10	over_represented
AKG1	AKP1	AKG	AKP	AKG1AKP1	Glycerol	2	-10	9.69e-06	-5.01378	-6.53789	1.46567	-10	-0.109008	as_expected
AKG1	AKP1	AKG	AKP	AKG1AKP1	Glycerol	1	-10	1.16e-06	-5.93623	-7.98483	1.46567	-10	-0.109008	as_expected
AKG1	AKP1	AKG	AKP	AKG1AKP1	Glucose	1	0.0500866	1.22e-06	-5.91263	-7.23299	1.46567	-1	-0.0557565	as_expected
AKG1	AKP1	AKG	AKP	AKG1AKP1	Glucose	2	0.0500866	0.000577581	-3.23839	-7.54498	1.46567	-1	-0.0557565	over_represented
AKG1	AKP1	AKG	AKP	AKG1AKP1	UY	1	-10	3.06e-08	-7.51367	-10.7905	1.46567	-10	-10	absent
AKG1	AKP1	AKG	AKP	AKG1AKP1	UY	2	-10	0.00459229	-2.33797	-6.65782	1.46567	-10	-10	over_represented
AKG1	ALG1	AKG	ALG	AKG1ALG1	Glycerol	2	-10	1.94e-08	-7.71275	-11.246	1.30685	-10	-0.0464457	absent
AKG1	ALG1	AKG	ALG	AKG1ALG1	Glycerol	1	-10	7.72e-09	-8.11232	-12.8184	1.30685	-10	-0.0464457	absent
AKG1	ALG1	AKG	ALG	AKG1ALG1	Glucose	1	-10	6.11e-09	-8.21366	-12.4969	1.30685	-1	-0.141619	absent
AKG1	ALG1	AKG	ALG	AKG1ALG1	Glucose	2	-10	1.32e-08	-7.87867	-12.1855	1.30685	-1	-0.141619	absent
AKG1	ALG1	AKG	ALG	AKG1ALG1	UY	1	-10	3.06e-08	-7.51367	-15.2303	1.30685	-10	-10	absent
AKG1	ALG1	AKG	ALG	AKG1ALG1	UY	2	-10	1.4e-08	-7.85305	-11.5046	1.30685	-10	-10	absent
AKG1	ANG1	AKG	ANG	AKG1ANG1	Glycerol	2	-10	1.94e-08	-7.71275	-11.6276	1.11929	-10	-1	absent
AKG1	ANG1	AKG	ANG	AKG1ANG1	Glycerol	1	-10	7.72e-09	-8.11232	-13.2	1.11929	-10	-1	absent
AKG1	ANG1	AKG	ANG	AKG1ANG1	Glucose	1	-10	6.11e-09	-8.21366	-12.8785	1.11929	-1	0.0663533	absent
AKG1	ANG1	AKG	ANG	AKG1ANG1	Glucose	2	-10	1.32e-08	-7.87867	-12.5671	1.11929	-1	0.0663533	absent
AKG1	ANG1	AKG	ANG	AKG1ANG1	UY	1	-10	3.06e-08	-7.51367	-15.6119	1.11929	-10	-10	absent
AKG1	ANG1	AKG	ANG	AKG1ANG1	UY	2	-10	1.4e-08	-7.85305	-11.8862	1.11929	-10	-10	absent
AKG1	AIM1	AKG	AIM	AKG1AIM1	Glycerol	2	-10	1.94e-08	-7.71275	-11.4132	1.48823	-10	-10	absent
AKG1	AIM1	AKG	AIM	AKG1AIM1	Glycerol	1	-10	7.72e-09	-8.11232	-12.9857	1.48823	-10	-10	absent
AKG1	AIM1	AKG	AIM	AKG1AIM1	Glucose	1	-10	6.11e-09	-8.21366	-12.6642	1.48823	-1	-10	absent
AKG1	AIM1	AKG	AIM	AKG1AIM1	Glucose	2	-10	1.32e-08	-7.87867	-12.3528	1.48823	-1	-10	absent
AKG1	AIM1	AKG	AIM	AKG1AIM1	UY	1	-10	3.06e-08	-7.51367	-15.3976	1.48823	-10	-10	absent
AKG1	AIM1	AKG	AIM	AKG1AIM1	UY	2	-10	1.4e-08	-7.85305	-11.6719	1.48823	-10	-10	absent
AKG1	AKV1	AKG	AKV	AKG1AKV1	Glycerol	2	-0.0118456	0.00501043	-2.30012	-6.30454	1.46551	-10	-0.0735332	over_represented
AKG1	AKV1	AKG	AKV	AKG1AKV1	Glycerol	1	-0.0118456	1.08e-06	-5.96619	-7.86614	1.46551	-10	-0.0735332	as_expected
AKG1	AKV1	AKG	AKV	AKG1AKV1	Glucose	1	-10	0.00225286	-2.64727	-7.20051	1.46551	-1	-0.033945	over_represented
AKG1	AKV1	AKG	AKV	AKG1AKV1	Glucose	2	-10	1.32e-08	-7.87867	-7.16583	1.46551	-1	-0.033945	absent
AKG1	AKV1	AKG	AKV	AKG1AKV1	UY	1	-10	3.06e-08	-7.51367	-10.6594	1.46551	-10	-10	absent
AKG1	AKV1	AKG	AKV	AKG1AKV1	UY	2	-10	1.82e-06	-5.73911	-6.8442	1.46551	-10	-10	as_expected
AKG1	BBI1	AKG	BBI	AKG1BBI1	Glycerol	2	-10	1.94e-08	-7.71275	-10.616	1.4645	-10	-0.0628554	absent
AKG1	BBI1	AKG	BBI	AKG1BBI1	Glycerol	1	-10	7.72e-09	-8.11232	-12.1884	1.4645	-10	-0.0628554	absent
AKG1	BBI1	AKG	BBI	AKG1BBI1	Glucose	1	-10	6.11e-09	-8.21366	-10.0957	1.4645	-1	0.0118567	absent
AKG1	BBI1	AKG	BBI	AKG1BBI1	Glucose	2	-10	1.32e-08	-7.87867	-11.5556	1.4645	-1	0.0118567	absent
AKG1	BBI1	AKG	BBI	AKG1BBI1	UY	1	-10	3.06e-08	-7.51367	-14.6004	1.4645	-10	-10	absent
AKG1	BBI1	AKG	BBI	AKG1BBI1	UY	2	-10	1.4e-08	-7.85305	-10.8747	1.4645	-10	-10	absent
AKG1	BAK1	AKG	BAK	AKG1BAK1	Glycerol	2	0.148598	1.94e-08	-7.71275	-11.165	1.4523	-10	-0.00177197	absent
AKG1	BAK1	AKG	BAK	AKG1BAK1	Glycerol	1	0.148598	7.72e-09	-8.11232	-9.34019	1.4523	-10	-0.00177197	absent
AKG1	BAK1	AKG	BAK	AKG1BAK1	Glucose	1	-10	6.11e-09	-8.21366	-8.36025	1.4523	-1	0.0639478	absent
AKG1	BAK1	AKG	BAK	AKG1BAK1	Glucose	2	-10	1.32e-08	-7.87867	-8.44109	1.4523	-1	0.0639478	absent
AKG1	BAK1	AKG	BAK	AKG1BAK1	UY	1	-10	3.06e-08	-7.51367	-11.5597	1.4523	-10	-10	absent
AKG1	BAK1	AKG	BAK	AKG1BAK1	UY	2	-10	1.4e-08	-7.85305	-7.38928	1.4523	-10	-10	absent
AKG1	BEH1	AKG	BEH	AKG1BEH1	Glycerol	2	-10	1.94e-08	-7.71275	-10.848	1.26314	-10	-1	absent
AKG1	BEH1	AKG	BEH	AKG1BEH1	Glycerol	1	-10	7.72e-09	-8.11232	-12.4205	1.26314	-10	-1	absent
AKG1	BEH1	AKG	BEH	AKG1BEH1	Glucose	1	-10	6.11e-09	-8.21366	-12.099	1.26314	-1	-0.0314472	absent
AKG1	BEH1	AKG	BEH	AKG1BEH1	Glucose	2	-10	1.32e-08	-7.87867	-11.7876	1.26314	-1	-0.0314472	absent
AKG1	BEH1	AKG	BEH	AKG1BEH1	UY	1	-10	3.06e-08	-7.51367	-14.8324	1.26314	-10	-10	absent
AKG1	BEH1	AKG	BEH	AKG1BEH1	UY	2	-10	1.4e-08	-7.85305	-11.1067	1.26314	-10	-10	absent
AKG1	BLA1	AKG	BLA	AKG1BLA1	Glycerol	2	-0.0909021	1.94e-08	-7.71275	-7.82108	1.46808	-10	-10	absent
AKG1	BLA1	AKG	BLA	AKG1BLA1	Glycerol	1	-0.0909021	7.72e-09	-8.11232	-12.5379	1.46808	-10	-10	absent
AKG1	BLA1	AKG	BLA	AKG1BLA1	Glucose	1	-10	6.11e-09	-8.21366	-7.99453	1.46808	-1	-10	absent
AKG1	BLA1	AKG	BLA	AKG1BLA1	Glucose	2	-10	1.32e-08	-7.87867	-11.905	1.46808	-1	-10	absent
AKG1	BLA1	AKG	BLA	AKG1BLA1	UY	1	-10	3.06e-08	-7.51367	-13.244	1.46808	-10	-10	absent
AKG1	BLA1	AKG	BLA	AKG1BLA1	UY	2	-10	1.4e-08	-7.85305	-7.59167	1.46808	-10	-10	absent
AKG1	BHM1	AKG	BHM	AKG1BHM1	Glycerol	2	-10	1.94e-08	-7.71275	-11.2298	1.45204	-10	-1	absent
AKG1	BHM1	AKG	BHM	AKG1BHM1	Glycerol	1	-10	7.72e-09	-8.11232	-12.8023	1.45204	-10	-1	absent
AKG1	BHM1	AKG	BHM	AKG1BHM1	Glucose	1	-10	6.11e-09	-8.21366	-12.4808	1.45204	-1	-10	absent
AKG1	BHM1	AKG	BHM	AKG1BHM1	Glucose	2	-10	1.32e-08	-7.87867	-12.1694	1.45204	-1	-10	absent
AKG1	BHM1	AKG	BHM	AKG1BHM1	UY	1	-10	3.06e-08	-7.51367	-15.2142	1.45204	-10	-10	absent
AKG1	BHM1	AKG	BHM	AKG1BHM1	UY	2	-10	1.4e-08	-7.85305	-11.4885	1.45204	-10	-10	absent
AKG1	BHN1	AKG	BHN	AKG1BHN1	Glycerol	2	-10	3.68e-06	-5.434	-7.19535	1.45973	-10	-1	as_expected
AKG1	BHN1	AKG	BHN	AKG1BHN1	Glycerol	1	-10	7.72e-09	-8.11232	-8.30673	1.45973	-10	-1	absent
AKG1	BHN1	AKG	BHN	AKG1BHN1	Glucose	1	0.0562041	6.11e-09	-8.21366	-7.6057	1.45973	-1	-1	absent
AKG1	BHN1	AKG	BHN	AKG1BHN1	Glucose	2	0.0562041	1.32e-08	-7.87867	-7.48422	1.45973	-1	-1	absent
AKG1	BHN1	AKG	BHN	AKG1BHN1	UY	1	-10	3.06e-08	-7.51367	-11.0677	1.45973	-10	-10	absent
AKG1	BHN1	AKG	BHN	AKG1BHN1	UY	2	-10	1.4e-08	-7.85305	-7.56644	1.45973	-10	-10	absent
AKG1	BHB1	AKG	BHB	AKG1BHB1	Glycerol	2	-10	5.04e-06	-5.29778	-7.03008	1.47294	-10	-10	as_expected
AKG1	BHB1	AKG	BHB	AKG1BHB1	Glycerol	1	-10	7.72e-09	-8.11232	-8.28481	1.47294	-10	-10	absent
AKG1	BHB1	AKG	BHB	AKG1BHB1	Glucose	1	-10	2.02e-06	-5.69514	-6.921	1.47294	-1	-10	as_expected
AKG1	BHB1	AKG	BHB	AKG1BHB1	Glucose	2	-10	1.32e-08	-7.87867	-7.04787	1.47294	-1	-10	absent
AKG1	BHB1	AKG	BHB	AKG1BHB1	UY	1	-10	3.06e-08	-7.51367	-10.453	1.47294	-10	-10	absent
AKG1	BHB1	AKG	BHB	AKG1BHB1	UY	2	-10	1.4e-08	-7.85305	-7.89122	1.47294	-10	-10	absent
AKG1	BLE1	AKG	BLE	AKG1BLE1	Glycerol	2	-0.0515094	0.00245523	-2.60991	-6.33951	1.46976	-10	-0.044381	over_represented
AKG1	BLE1	AKG	BLE	AKG1BLE1	Glycerol	1	-0.0515094	4.86e-06	-5.31298	-7.44603	1.46976	-10	-0.044381	as_expected
AKG1	BLE1	AKG	BLE	AKG1BLE1	Glucose	1	0.017706	1.22e-06	-5.91263	-7.46283	1.46976	-1	-0.0748489	as_expected
AKG1	BLE1	AKG	BLE	AKG1BLE1	Glucose	2	0.017706	2.91e-06	-5.53625	-7.49457	1.46976	-1	-0.0748489	as_expected
AKG1	BLE1	AKG	BLE	AKG1BLE1	UY	1	-10	3.06e-08	-7.51367	-10.7987	1.46976	-10	-10	absent
AKG1	BLE1	AKG	BLE	AKG1BLE1	UY	2	-10	0.00323382	-2.49028	-6.56175	1.46976	-10	-10	over_represented
AKG1	BHF1	AKG	BHF	AKG1BHF1	Glycerol	2	0.0559669	1.94e-08	-7.71275	-7.87158	1.45849	-10	0.0945635	absent
AKG1	BHF1	AKG	BHF	AKG1BHF1	Glycerol	1	0.0559669	7.72e-09	-8.11232	-12.6323	1.45849	-10	0.0945635	absent
AKG1	BHF1	AKG	BHF	AKG1BHF1	Glucose	1	-10	6.11e-09	-8.21366	-7.7979	1.45849	-1	0.0612509	absent
AKG1	BHF1	AKG	BHF	AKG1BHF1	Glucose	2	-10	1.32e-08	-7.87867	-8.12323	1.45849	-1	0.0612509	absent
AKG1	BHF1	AKG	BHF	AKG1BHF1	UY	1	-10	3.06e-08	-7.51367	-10.9294	1.45849	-10	-10	absent
AKG1	BHF1	AKG	BHF	AKG1BHF1	UY	2	-10	1.4e-08	-7.85305	-11.3186	1.45849	-10	-10	absent
AKG1	BKR1	AKG	BKR	AKG1BKR1	Glycerol	2	-10	3.1e-06	-5.50863	-7.28442	1.46893	-10	-1	as_expected
AKG1	BKR1	AKG	BKR	AKG1BKR1	Glycerol	1	-10	7.72e-09	-8.11232	-8.29647	1.46893	-10	-1	absent
AKG1	BKR1	AKG	BKR	AKG1BKR1	Glucose	1	-10	6.11e-09	-8.21366	-7.95244	1.46893	-1	-0.013402	absent
AKG1	BKR1	AKG	BKR	AKG1BKR1	Glucose	2	-10	1.32e-08	-7.87867	-7.61785	1.46893	-1	-0.013402	absent
AKG1	BKR1	AKG	BKR	AKG1BKR1	UY	1	-10	3.06e-08	-7.51367	-10.8652	1.46893	-10	-10	absent
AKG1	BKR1	AKG	BKR	AKG1BKR1	UY	2	-10	1.4e-08	-7.85305	-7.09029	1.46893	-10	-10	absent
AKG1	BLL1	AKG	BLL	AKG1BLL1	Glycerol	2	0.0915168	3.49e-06	-5.45748	-7.34062	1.47264	-10	0.120353	as_expected
AKG1	BLL1	AKG	BLL	AKG1BLL1	Glycerol	1	0.0915168	7.72e-09	-8.11232	-9.07788	1.47264	-10	0.120353	absent
AKG1	BLL1	AKG	BLL	AKG1BLL1	Glucose	1	-1	0.00204901	-2.68846	-7.63836	1.47264	-1	-1	over_represented
AKG1	BLL1	AKG	BLL	AKG1BLL1	Glucose	2	-1	1.32e-08	-7.87867	-7.9254	1.47264	-1	-1	absent
AKG1	BLL1	AKG	BLL	AKG1BLL1	UY	1	-10	3.06e-08	-7.51367	-10.7188	1.47264	-10	-10	absent
AKG1	BLL1	AKG	BLL	AKG1BLL1	UY	2	-10	1.4e-08	-7.85305	-7.55906	1.47264	-10	-10	absent
AKG1	BNI1	AKG	BNI	AKG1BNI1	Glycerol	2	-10	1.94e-08	-7.71275	-7.63729	1.4693	-10	-10	absent
AKG1	BNI1	AKG	BNI	AKG1BNI1	Glycerol	1	-10	7.72e-09	-8.11232	-9.79511	1.4693	-10	-10	absent
AKG1	BNI1	AKG	BNI	AKG1BNI1	Glucose	1	-10	6.11e-09	-8.21366	-8.61016	1.4693	-1	-10	absent
AKG1	BNI1	AKG	BNI	AKG1BNI1	Glucose	2	-10	1.32e-08	-7.87867	-8.95265	1.4693	-1	-10	absent
AKG1	BNI1	AKG	BNI	AKG1BNI1	UY	1	-10	3.06e-08	-7.51367	-15.1993	1.4693	-10	-10	absent
AKG1	BNI1	AKG	BNI	AKG1BNI1	UY	2	-10	1.4e-08	-7.85305	-11.4737	1.4693	-10	-10	absent
AKG1	BQG1	AKG	BQG	AKG1BQG1	Glycerol	2	0.0502494	4.26e-06	-5.37033	-6.97802	1.46974	-10	0.0537228	as_expected
AKG1	BQG1	AKG	BQG	AKG1BQG1	Glycerol	1	0.0502494	7.72e-09	-8.11232	-8.4288	1.46974	-10	0.0537228	absent
AKG1	BQG1	AKG	BQG	AKG1BQG1	Glucose	1	-10	6.11e-09	-8.21366	-7.80187	1.46974	-1	-0.0571925	absent
AKG1	BQG1	AKG	BQG	AKG1BQG1	Glucose	2	-10	1.32e-08	-7.87867	-7.73363	1.46974	-1	-0.0571925	absent
AKG1	BQG1	AKG	BQG	AKG1BQG1	UY	1	-10	3.06e-08	-7.51367	-10.5574	1.46974	-10	-10	absent
AKG1	BQG1	AKG	BQG	AKG1BQG1	UY	2	-10	1.4e-08	-7.85305	-7.15384	1.46974	-10	-10	absent
AKG1	BNK1	AKG	BNK	AKG1BNK1	Glycerol	2	0.0581118	9.88e-06	-5.00518	-6.68415	1.46824	-10	0.115878	as_expected
AKG1	BNK1	AKG	BNK	AKG1BNK1	Glycerol	1	0.0581118	1.93e-06	-5.71438	-7.8071	1.46824	-10	0.115878	as_expected
AKG1	BNK1	AKG	BNK	AKG1BNK1	Glucose	1	0.0018461	1.53e-06	-5.81572	-7.30848	1.46824	-1	-0.0796816	as_expected
AKG1	BNK1	AKG	BNK	AKG1BNK1	Glucose	2	0.0018461	1.32e-08	-7.87867	-7.55041	1.46824	-1	-0.0796816	absent
AKG1	BNK1	AKG	BNK	AKG1BNK1	UY	1	-10	3.06e-08	-7.51367	-10.4702	1.46824	-10	-10	absent
AKG1	BNK1	AKG	BNK	AKG1BNK1	UY	2	-10	2.24e-06	-5.64893	-6.88006	1.46824	-10	-10	as_expected
AKG1	BPQ1	AKG	BPQ	AKG1BPQ1	Glycerol	2	-0.0080107	1.38e-05	-4.86149	-6.73756	1.45706	-10	0.0632255	as_expected
AKG1	BPQ1	AKG	BPQ	AKG1BPQ1	Glycerol	1	-0.0080107	3.01e-06	-5.52126	-7.69472	1.45706	-10	0.0632255	as_expected
AKG1	BPQ1	AKG	BPQ	AKG1BPQ1	Glucose	1	-0.000820375	1.16e-06	-5.9349	-7.56284	1.45706	-1	0.00714221	as_expected
AKG1	BPQ1	AKG	BPQ	AKG1BPQ1	Glucose	2	-0.000820375	1.59e-06	-5.79949	-7.61897	1.45706	-1	0.00714221	as_expected
AKG1	BPQ1	AKG	BPQ	AKG1BPQ1	UY	1	-10	3.06e-08	-7.51367	-11.0386	1.45706	-10	-10	absent
AKG1	BPQ1	AKG	BPQ	AKG1BPQ1	UY	2	-10	5.33e-06	-5.27327	-6.725	1.45706	-10	-10	as_expected
AKG1	BQH1	AKG	BQH	AKG1BQH1	Glycerol	2	-10	1.94e-08	-7.71275	-11.6096	1.47297	-10	-1	absent
AKG1	BQH1	AKG	BQH	AKG1BQH1	Glycerol	1	-10	7.72e-09	-8.11232	-13.182	1.47297	-10	-1	absent
AKG1	BQH1	AKG	BQH	AKG1BQH1	Glucose	1	-10	6.11e-09	-8.21366	-9.42105	1.47297	-1	0.0201877	absent
AKG1	BQH1	AKG	BQH	AKG1BQH1	Glucose	2	-10	1.32e-08	-7.87867	-12.5492	1.47297	-1	0.0201877	absent
AKG1	BQH1	AKG	BQH	AKG1BQH1	UY	1	-10	3.06e-08	-7.51367	-15.5939	1.47297	-10	-10	absent
AKG1	BQH1	AKG	BQH	AKG1BQH1	UY	2	-10	1.4e-08	-7.85305	-11.8683	1.47297	-10	-10	absent
AKG1	BRA1	AKG	BRA	AKG1BRA1	Glycerol	2	-10	0.0049897	-2.30193	-6.57949	1.4626	-10	-1	over_represented
AKG1	BRA1	AKG	BRA	AKG1BRA1	Glycerol	1	-10	1.47e-06	-5.83357	-7.91625	1.4626	-10	-1	as_expected
AKG1	BRA1	AKG	BRA	AKG1BRA1	Glucose	1	-10	1.16e-06	-5.9349	-7.57042	1.4626	-1	-0.0988197	as_expected
AKG1	BRA1	AKG	BRA	AKG1BRA1	Glucose	2	-10	1.72e-06	-5.76473	-7.45476	1.4626	-1	-0.0988197	as_expected
AKG1	BRA1	AKG	BRA	AKG1BRA1	UY	1	-10	3.06e-08	-7.51367	-10.9636	1.4626	-10	-10	absent
AKG1	BRA1	AKG	BRA	AKG1BRA1	UY	2	-10	1.54e-06	-5.81166	-7.26953	1.4626	-10	-10	as_expected
AKG1	BLN1	AKG	BLN	AKG1BLN1	Glycerol	2	-10	1.94e-08	-7.71275	-11.0959	1.47162	-10	-10	absent
AKG1	BLN1	AKG	BLN	AKG1BLN1	Glycerol	1	-10	7.72e-09	-8.11232	-12.6683	1.47162	-10	-10	absent
AKG1	BLN1	AKG	BLN	AKG1BLN1	Glucose	1	-10	6.11e-09	-8.21366	-8.61125	1.47162	-1	-10	absent
AKG1	BLN1	AKG	BLN	AKG1BLN1	Glucose	2	-10	1.32e-08	-7.87867	-8.54307	1.47162	-1	-10	absent
AKG1	BLN1	AKG	BLN	AKG1BLN1	UY	1	-10	3.06e-08	-7.51367	-15.0802	1.47162	-10	-10	absent
AKG1	BLN1	AKG	BLN	AKG1BLN1	UY	2	-10	1.4e-08	-7.85305	-7.54873	1.47162	-10	-10	absent
AKG1	BQI1	AKG	BQI	AKG1BQI1	Glycerol	2	0.11018	1.94e-08	-7.71275	-11.262	1.46878	-10	-0.01173	absent
AKG1	BQI1	AKG	BQI	AKG1BQI1	Glycerol	1	0.11018	7.72e-09	-8.11232	-9.30815	1.46878	-10	-0.01173	absent
AKG1	BQI1	AKG	BQI	AKG1BQI1	Glucose	1	-10	6.11e-09	-8.21366	-9.21464	1.46878	-1	-0.108288	absent
AKG1	BQI1	AKG	BQI	AKG1BQI1	Glucose	2	-10	1.32e-08	-7.87867	-8.95972	1.46878	-1	-0.108288	absent
AKG1	BQI1	AKG	BQI	AKG1BQI1	UY	1	-10	3.06e-08	-7.51367	-11.3439	1.46878	-10	-10	absent
AKG1	BQI1	AKG	BQI	AKG1BQI1	UY	2	-10	1.68e-06	-5.77387	-7.2502	1.46878	-10	-10	as_expected
AKG1	BRB1	AKG	BRB	AKG1BRB1	Glycerol	2	0.0205089	4.84e-06	-5.31481	-7.01093	1.45343	-10	0.000627839	as_expected
AKG1	BRB1	AKG	BRB	AKG1BRB1	Glycerol	1	0.0205089	7.72e-09	-8.11232	-8.60999	1.45343	-10	0.000627839	absent
AKG1	BRB1	AKG	BRB	AKG1BRB1	Glucose	1	0.0140974	3.67e-06	-5.4355	-6.93299	1.45343	-1	0.0350566	as_expected
AKG1	BRB1	AKG	BRB	AKG1BRB1	Glucose	2	0.0140974	0.00216143	-2.66526	-6.91447	1.45343	-1	0.0350566	over_represented
AKG1	BRB1	AKG	BRB	AKG1BRB1	UY	1	-10	3.06e-08	-7.51367	-10.5836	1.45343	-10	-10	absent
AKG1	BRB1	AKG	BRB	AKG1BRB1	UY	2	-10	1.4e-08	-7.85305	-7.16231	1.45343	-10	-10	absent
AKG1	BLP1	AKG	BLP	AKG1BLP1	Glycerol	2	0.0307267	1.94e-08	-7.71275	-11.1786	1.47188	-10	0.0191829	absent
AKG1	BLP1	AKG	BLP	AKG1BLP1	Glycerol	1	0.0307267	7.72e-09	-8.11232	-9.02917	1.47188	-10	0.0191829	absent
AKG1	BLP1	AKG	BLP	AKG1BLP1	Glucose	1	-0.0107751	6.11e-09	-8.21366	-12.4296	1.47188	-1	0.0477277	absent
AKG1	BLP1	AKG	BLP	AKG1BLP1	Glucose	2	-0.0107751	1.32e-08	-7.87867	-12.1182	1.47188	-1	0.0477277	absent
AKG1	BLP1	AKG	BLP	AKG1BLP1	UY	1	-10	3.06e-08	-7.51367	-15.163	1.47188	-10	-10	absent
AKG1	BLP1	AKG	BLP	AKG1BLP1	UY	2	-10	1.4e-08	-7.85305	-11.4373	1.47188	-10	-10	absent
AKG1	BRC1	AKG	BRC	AKG1BRC1	Glycerol	2	-10	1.26e-05	-4.89984	-6.64479	1.45896	-10	-0.0845599	as_expected
AKG1	BRC1	AKG	BRC	AKG1BRC1	Glycerol	1	-10	2.7e-06	-5.56825	-7.62569	1.45896	-10	-0.0845599	as_expected
AKG1	BRC1	AKG	BRC	AKG1BRC1	Glucose	1	-10	2.32e-06	-5.63387	-7.09705	1.45896	-1	-0.0843597	as_expected
AKG1	BRC1	AKG	BRC	AKG1BRC1	Glucose	2	-10	1.45e-06	-5.83728	-7.24682	1.45896	-1	-0.0843597	as_expected
AKG1	BRC1	AKG	BRC	AKG1BRC1	UY	1	-10	3.06e-08	-7.51367	-11.6823	1.45896	-10	-10	absent
AKG1	BRC1	AKG	BRC	AKG1BRC1	UY	2	-10	2.52e-06	-5.59778	-6.8565	1.45896	-10	-10	as_expected
AKG1	BPT1	AKG	BPT	AKG1BPT1	Glycerol	2	0.0437985	4.84e-06	-5.31481	-7.16257	1.46675	-10	0.0527905	as_expected
AKG1	BPT1	AKG	BPT	AKG1BPT1	Glycerol	1	0.0437985	1e-06	-5.99838	-8.01792	1.46675	-10	0.0527905	as_expected
AKG1	BPT1	AKG	BPT	AKG1BPT1	Glucose	1	-10	6.11e-09	-8.21366	-7.88613	1.46675	-1	-0.0226414	absent
AKG1	BPT1	AKG	BPT	AKG1BPT1	Glucose	2	-10	1.32e-08	-7.87867	-7.97905	1.46675	-1	-0.0226414	absent
AKG1	BPT1	AKG	BPT	AKG1BPT1	UY	1	-10	3.06e-08	-7.51367	-10.9569	1.46675	-10	-10	absent
AKG1	BPT1	AKG	BPT	AKG1BPT1	UY	2	-10	0.00756803	-2.12102	-7.13438	1.46675	-10	-10	over_represented
AKG1	BRD1	AKG	BRD	AKG1BRD1	Glycerol	2	0.0938122	1.94e-08	-7.71275	-11.1425	1.46753	-10	0.10436	absent
AKG1	BRD1	AKG	BRD	AKG1BRD1	Glycerol	1	0.0938122	7.72e-09	-8.11232	-8.87085	1.46753	-10	0.10436	absent
AKG1	BRD1	AKG	BRD	AKG1BRD1	Glucose	1	-0.018262	1.47e-06	-5.83344	-7.48352	1.46753	-1	-0.0248454	as_expected
AKG1	BRD1	AKG	BRD	AKG1BRD1	Glucose	2	-0.018262	2.12e-06	-5.67455	-7.50978	1.46753	-1	-0.0248454	as_expected
AKG1	BRD1	AKG	BRD	AKG1BRD1	UY	1	-10	3.06e-08	-7.51367	-11.4343	1.46753	-10	-10	absent
AKG1	BRD1	AKG	BRD	AKG1BRD1	UY	2	-10	1.4e-08	-7.85305	-7.71523	1.46753	-10	-10	absent
AKG1	BMK1	AKG	BMK	AKG1BMK1	Glycerol	2	0.0592738	1.94e-08	-7.71275	-7.70564	1.4695	-10	0.0727937	absent
AKG1	BMK1	AKG	BMK	AKG1BMK1	Glycerol	1	0.0592738	7.72e-09	-8.11232	-12.4536	1.4695	-10	0.0727937	absent
AKG1	BMK1	AKG	BMK	AKG1BMK1	Glucose	1	-0.115319	7.95e-07	-6.09971	-7.42349	1.4695	-1	0.0206207	as_expected
AKG1	BMK1	AKG	BMK	AKG1BMK1	Glucose	2	-0.115319	1.32e-08	-7.87867	-7.49647	1.4695	-1	0.0206207	absent
AKG1	BMK1	AKG	BMK	AKG1BMK1	UY	1	-10	3.06e-08	-7.51367	-10.8263	1.4695	-10	-10	absent
AKG1	BMK1	AKG	BMK	AKG1BMK1	UY	2	-10	1.4e-08	-7.85305	-7.75678	1.4695	-10	-10	absent
AKG1	BQP1	AKG	BQP	AKG1BQP1	Glycerol	2	-10	1.94e-08	-7.71275	-11.016	1.45595	-10	-0.0301991	absent
AKG1	BQP1	AKG	BQP	AKG1BQP1	Glycerol	1	-10	7.72e-09	-8.11232	-8.69237	1.45595	-10	-0.0301991	absent
AKG1	BQP1	AKG	BQP	AKG1BQP1	Glucose	1	-0.0475873	1.28e-06	-5.89144	-7.37026	1.45595	-1	0.0119541	as_expected
AKG1	BQP1	AKG	BQP	AKG1BQP1	Glucose	2	-0.0475873	2.78e-06	-5.55645	-7.24662	1.45595	-1	0.0119541	as_expected
AKG1	BQP1	AKG	BQP	AKG1BQP1	UY	1	-10	3.06e-08	-7.51367	-11.2953	1.45595	-10	-10	absent
AKG1	BQP1	AKG	BQP	AKG1BQP1	UY	2	-10	1.4e-08	-7.85305	-11.2747	1.45595	-10	-10	absent
AKG1	BLV1	AKG	BLV	AKG1BLV1	Glycerol	2	0.0754272	0.00259144	-2.58646	-7.48173	1.46969	-10	0.0838921	over_represented
AKG1	BLV1	AKG	BLV	AKG1BLV1	Glycerol	1	0.0754272	7.72e-09	-8.11232	-9.38696	1.46969	-10	0.0838921	absent
AKG1	BLV1	AKG	BLV	AKG1BLV1	Glucose	1	-10	6.11e-09	-8.21366	-8.88815	1.46969	-1	-0.0681483	absent
AKG1	BLV1	AKG	BLV	AKG1BLV1	Glucose	2	-10	1.32e-08	-7.87867	-8.41557	1.46969	-1	-0.0681483	absent
AKG1	BLV1	AKG	BLV	AKG1BLV1	UY	1	-10	3.06e-08	-7.51367	-15.0833	1.46969	-10	-10	absent
AKG1	BLV1	AKG	BLV	AKG1BLV1	UY	2	-10	1.4e-08	-7.85305	-11.3576	1.46969	-10	-10	absent
AKG1	BQQ1	AKG	BQQ	AKG1BQQ1	Glycerol	2	-10	1.94e-08	-7.71275	-11.5871	1.46846	-10	0.0824425	absent
AKG1	BQQ1	AKG	BQQ	AKG1BQQ1	Glycerol	1	-10	7.72e-09	-8.11232	-13.1595	1.46846	-10	0.0824425	absent
AKG1	BQQ1	AKG	BQQ	AKG1BQQ1	Glucose	1	-10	6.11e-09	-8.21366	-9.38661	1.46846	-1	0.0291802	absent
AKG1	BQQ1	AKG	BQQ	AKG1BQQ1	Glucose	2	-10	1.32e-08	-7.87867	-12.5267	1.46846	-1	0.0291802	absent
AKG1	BQQ1	AKG	BQQ	AKG1BQQ1	UY	1	-10	3.06e-08	-7.51367	-15.5714	1.46846	-10	-10	absent
AKG1	BQQ1	AKG	BQQ	AKG1BQQ1	UY	2	-10	1.4e-08	-7.85305	-11.8458	1.46846	-10	-10	absent
AKG1	BMA1	AKG	BMA	AKG1BMA1	Glycerol	2	0.0545112	3.68e-06	-5.434	-7.34902	1.44568	-10	0.0885346	as_expected
AKG1	BMA1	AKG	BMA	AKG1BMA1	Glycerol	1	0.0545112	7.72e-09	-8.11232	-12.619	1.44568	-10	0.0885346	absent
AKG1	BMA1	AKG	BMA	AKG1BMA1	Glucose	1	-10	6.11e-09	-8.21366	-7.93505	1.44568	-1	0.0277247	absent
AKG1	BMA1	AKG	BMA	AKG1BMA1	Glucose	2	-10	1.32e-08	-7.87867	-7.98479	1.44568	-1	0.0277247	absent
AKG1	BMA1	AKG	BMA	AKG1BMA1	UY	1	-10	3.06e-08	-7.51367	-15.0309	1.44568	-10	-10	absent
AKG1	BMA1	AKG	BMA	AKG1BMA1	UY	2	-10	1.4e-08	-7.85305	-7.29027	1.44568	-10	-10	absent
AKG1	BQR1	AKG	BQR	AKG1BQR1	Glycerol	2	0.0732353	4.84e-06	-5.31481	-7.10801	1.46845	-10	0.0588489	as_expected
AKG1	BQR1	AKG	BQR	AKG1BQR1	Glycerol	1	0.0732353	7.72e-09	-8.11232	-8.46481	1.46845	-10	0.0588489	absent
AKG1	BQR1	AKG	BQR	AKG1BQR1	Glucose	1	-10	6.11e-09	-8.21366	-8.66972	1.46845	-1	-0.0545715	absent
AKG1	BQR1	AKG	BQR	AKG1BQR1	Glucose	2	-10	1.32e-08	-7.87867	-7.92401	1.46845	-1	-0.0545715	absent
AKG1	BQR1	AKG	BQR	AKG1BQR1	UY	1	-10	3.06e-08	-7.51367	-10.9433	1.46845	-10	-10	absent
AKG1	BQR1	AKG	BQR	AKG1BQR1	UY	2	-10	1.4e-08	-7.85305	-7.16501	1.46845	-10	-10	absent
AKG1	CAD1	AKG	CAD	AKG1CAD1	Glycerol	2	-10	1.94e-08	-7.71275	-10.7654	1.49512	-10	-10	absent
AKG1	CAD1	AKG	CAD	AKG1CAD1	Glycerol	1	-10	7.72e-09	-8.11232	-12.3379	1.49512	-10	-10	absent
AKG1	CAD1	AKG	CAD	AKG1CAD1	Glucose	1	-10	6.11e-09	-8.21366	-12.0164	1.49512	-1	-0.0194773	absent
AKG1	CAD1	AKG	CAD	AKG1CAD1	Glucose	2	-10	1.32e-08	-7.87867	-11.705	1.49512	-1	-0.0194773	absent
AKG1	CAD1	AKG	CAD	AKG1CAD1	UY	1	-10	3.06e-08	-7.51367	-14.7498	1.49512	-10	-10	absent
AKG1	CAD1	AKG	CAD	AKG1CAD1	UY	2	-10	1.4e-08	-7.85305	-11.0241	1.49512	-10	-10	absent
AKG1	BSB1	AKG	BSB	AKG1BSB1	Glycerol	2	-10	1.94e-08	-7.71275	-12.032	1.46644	-10	-10	absent
AKG1	BSB1	AKG	BSB	AKG1BSB1	Glycerol	1	-10	7.72e-09	-8.11232	-13.6044	1.46644	-10	-10	absent
AKG1	BSB1	AKG	BSB	AKG1BSB1	Glucose	1	-10	6.11e-09	-8.21366	-9.06312	1.46644	-1	-10	absent
AKG1	BSB1	AKG	BSB	AKG1BSB1	Glucose	2	-10	1.32e-08	-7.87867	-9.89751	1.46644	-1	-10	absent
AKG1	BSB1	AKG	BSB	AKG1BSB1	UY	1	-10	3.06e-08	-7.51367	-16.0163	1.46644	-10	-10	absent
AKG1	BSB1	AKG	BSB	AKG1BSB1	UY	2	-10	1.4e-08	-7.85305	-12.2906	1.46644	-10	-10	absent
AKG1	BTH1	AKG	BTH	AKG1BTH1	Glycerol	2	-10	5.29e-05	-4.27659	-6.11439	1.4613	-10	-1	as_expected
AKG1	BTH1	AKG	BTH	AKG1BTH1	Glycerol	1	-10	0.0016076	-2.79382	-7.15671	1.4613	-10	-1	over_represented
AKG1	BTH1	AKG	BTH	AKG1BTH1	Glucose	1	-10	1.59e-06	-5.79868	-7.40606	1.4613	-1	-0.01391	as_expected
AKG1	BTH1	AKG	BTH	AKG1BTH1	Glucose	2	-10	0.00133989	-2.87293	-7.40797	1.4613	-1	-0.01391	over_represented
AKG1	BTH1	AKG	BTH	AKG1BTH1	UY	1	-10	3.06e-08	-7.51367	-10.9713	1.4613	-10	-10	absent
AKG1	BTH1	AKG	BTH	AKG1BTH1	UY	2	-10	2.23e-05	-4.65165	-6.105	1.4613	-10	-10	as_expected
AKG1	AHP1	AKG	AHP	AKG1AHP1	Glycerol	2	0.0559265	1.94e-08	-7.71275	-11.0769	1.50097	-10	0.0888156	absent
AKG1	AHP1	AKG	AHP	AKG1AHP1	Glycerol	1	0.0559265	7.72e-09	-8.11232	-12.6494	1.50097	-10	0.0888156	absent
AKG1	AHP1	AKG	AHP	AKG1AHP1	Glucose	1	-10	6.11e-09	-8.21366	-12.3279	1.50097	-1	-1	absent
AKG1	AHP1	AKG	AHP	AKG1AHP1	Glucose	2	-10	1.32e-08	-7.87867	-12.0165	1.50097	-1	-1	absent
AKG1	AHP1	AKG	AHP	AKG1AHP1	UY	1	-10	3.06e-08	-7.51367	-15.0613	1.50097	-10	-10	absent
AKG1	AHP1	AKG	AHP	AKG1AHP1	UY	2	-10	1.4e-08	-7.85305	-11.3356	1.50097	-10	-10	absent
AKG1	CQD1	AKG	CQD	AKG1CQD1	Glycerol	2	-10	1.94e-08	-7.71275	-7.77708	1.28467	-10	-10	absent
AKG1	CQD1	AKG	CQD	AKG1CQD1	Glycerol	1	-10	7.72e-09	-8.11232	-8.88814	1.28467	-10	-10	absent
AKG1	CQD1	AKG	CQD	AKG1CQD1	Glucose	1	0.0492416	6.11e-09	-8.21366	-8.43019	1.28467	-1	0.0106465	absent
AKG1	CQD1	AKG	CQD	AKG1CQD1	Glucose	2	0.0492416	1.32e-08	-7.87867	-8.20408	1.28467	-1	0.0106465	absent
AKG1	CQD1	AKG	CQD	AKG1CQD1	UY	1	-10	3.06e-08	-7.51367	-15.3373	1.28467	-10	-10	absent
AKG1	CQD1	AKG	CQD	AKG1CQD1	UY	2	-10	1.4e-08	-7.85305	-11.6116	1.28467	-10	-10	absent
AKG1	APV1	AKG	APV	AKG1APV1	Glycerol	2	0.0617637	1.34e-05	-4.8739	-6.41477	1.4675	-10	0.176787	as_expected
AKG1	APV1	AKG	APV	AKG1APV1	Glycerol	1	0.0617637	1.62e-06	-5.7901	-7.62041	1.4675	-10	0.176787	as_expected
AKG1	APV1	AKG	APV	AKG1APV1	Glucose	1	0.139462	6.11e-09	-8.21366	-7.88907	1.4675	-1	-0.0613302	absent
AKG1	APV1	AKG	APV	AKG1APV1	Glucose	2	0.139462	1.32e-08	-7.87867	-7.72748	1.4675	-1	-0.0613302	absent
AKG1	APV1	AKG	APV	AKG1APV1	UY	1	-10	3.06e-08	-7.51367	-10.5485	1.4675	-10	-10	absent
AKG1	APV1	AKG	APV	AKG1APV1	UY	2	-10	1.4e-08	-7.85305	-6.90539	1.4675	-10	-10	absent
AKG1	AST1	AKG	AST	AKG1AST1	Glycerol	2	-10	2.13e-05	-4.67136	-6.68762	1.42756	-10	-1	as_expected
AKG1	AST1	AKG	AST	AKG1AST1	Glycerol	1	-10	3.24e-06	-5.48907	-7.87166	1.42756	-10	-1	as_expected
AKG1	AST1	AKG	AST	AKG1AST1	Glucose	1	-1	7.95e-07	-6.09971	-7.82292	1.42756	-1	0.0143308	as_expected
AKG1	AST1	AKG	AST	AKG1AST1	Glucose	2	-1	1.72e-06	-5.76473	-7.87242	1.42756	-1	0.0143308	as_expected
AKG1	AST1	AKG	AST	AKG1AST1	UY	1	-10	3.06e-08	-7.51367	-11.3824	1.42756	-10	-10	absent
AKG1	AST1	AKG	AST	AKG1AST1	UY	2	-10	8.28e-06	-5.0822	-6.68437	1.42756	-10	-10	as_expected
AKG1	CCV1	AKG	CCV	AKG1CCV1	Glycerol	2	-10	1.82e-05	-4.73963	-6.53012	1.26344	-10	-1	as_expected
AKG1	CCV1	AKG	CCV	AKG1CCV1	Glycerol	1	-10	9.27e-07	-6.03314	-8.0187	1.26344	-10	-1	as_expected
AKG1	CCV1	AKG	CCV	AKG1CCV1	Glucose	1	-10	6.11e-09	-8.21366	-7.93614	1.26344	-1	0.044604	absent
AKG1	CCV1	AKG	CCV	AKG1CCV1	Glucose	2	-10	1.32e-08	-7.87867	-7.59866	1.26344	-1	0.044604	absent
AKG1	CCV1	AKG	CCV	AKG1CCV1	UY	1	-10	3.06e-08	-7.51367	-11.3168	1.26344	-10	-10	absent
AKG1	CCV1	AKG	CCV	AKG1CCV1	UY	2	-10	6.73e-06	-5.17181	-6.61319	1.26344	-10	-10	as_expected
AKG1	YAR1	AKG	YAR	AKG1YAR1	Glycerol	2	-10	1.94e-08	-7.71275	-11.3149	1.30142	-10	-1	absent
AKG1	YAR1	AKG	YAR	AKG1YAR1	Glycerol	1	-10	7.72e-09	-8.11232	-12.8873	1.30142	-10	-1	absent
AKG1	YAR1	AKG	YAR	AKG1YAR1	Glucose	1	-10	6.11e-09	-8.21366	-8.31899	1.30142	-1	-0.0705407	absent
AKG1	YAR1	AKG	YAR	AKG1YAR1	Glucose	2	-10	1.32e-08	-7.87867	-8.40029	1.30142	-1	-0.0705407	absent
AKG1	YAR1	AKG	YAR	AKG1YAR1	UY	1	-10	3.06e-08	-7.51367	-11.6407	1.30142	-10	-10	absent
AKG1	YAR1	AKG	YAR	AKG1YAR1	UY	2	-10	1.4e-08	-7.85305	-11.5736	1.30142	-10	-10	absent
AKG1	YBU1	AKG	YBU	AKG1YBU1	Glycerol	2	-10	0.00906819	-2.04248	-6.59262	1.35403	-10	-1	over_represented
AKG1	YBU1	AKG	YBU	AKG1YBU1	Glycerol	1	-10	1.7e-06	-5.7699	-7.91833	1.35403	-10	-1	as_expected
AKG1	YBU1	AKG	YBU	AKG1YBU1	Glucose	1	-10	6.11e-09	-8.21366	-12.3382	1.35403	-1	-10	absent
AKG1	YBU1	AKG	YBU	AKG1YBU1	Glucose	2	-10	1.32e-08	-7.87867	-12.0268	1.35403	-1	-10	absent
AKG1	YBU1	AKG	YBU	AKG1YBU1	UY	1	-10	3.06e-08	-7.51367	-15.0716	1.35403	-10	-10	absent
AKG1	YBU1	AKG	YBU	AKG1YBU1	UY	2	-10	4.35e-06	-5.36169	-6.71104	1.35403	-10	-10	as_expected
AKV1	AKB1	AKV	AKB	AKV1AKB1	Glycerol	2	0.00617814	1.94e-08	-7.71275	-11.5081	1.53322	-10	-1	absent
AKV1	AKB1	AKV	AKB	AKV1AKB1	Glycerol	1	0.00617814	7.72e-09	-8.11232	-11.7991	1.53322	-10	-1	absent
AKV1	AKB1	AKV	AKB	AKV1AKB1	Glucose	1	0.015877	6.11e-09	-8.21366	-12.1394	1.53322	-10	-0.0154866	absent
AKV1	AKB1	AKV	AKB	AKV1AKB1	Glucose	2	0.015877	1.32e-08	-7.87867	-12.0652	1.53322	-10	-0.0154866	absent
AKV1	AKB1	AKV	AKB	AKV1AKB1	UY	1	-10	3.06e-08	-7.51367	-11.1547	1.53322	-10	-10	absent
AKV1	AKB1	AKV	AKB	AKV1AKB1	UY	2	-10	1.4e-08	-7.85305	-11.7294	1.53322	-10	-10	absent
AKV1	AKP1	AKV	AKP	AKV1AKP1	Glycerol	2	-10	1.94e-08	-7.71275	-10.5509	0.00112418	-10	-0.109008	absent
AKV1	AKP1	AKV	AKP	AKV1AKP1	Glycerol	1	-10	7.72e-09	-8.11232	-11.2246	0.00112418	-10	-0.109008	absent
AKV1	AKP1	AKV	AKP	AKV1AKP1	Glucose	1	-0.0891314	6.11e-09	-8.21366	-10.9969	0.00112418	-10	-0.0557565	absent
AKV1	AKP1	AKV	AKP	AKV1AKP1	Glucose	2	-0.0891314	1.32e-08	-7.87867	-10.9503	0.00112418	-10	-0.0557565	absent
AKV1	AKP1	AKV	AKP	AKV1AKP1	UY	1	-10	3.06e-08	-7.51367	-10.421	0.00112418	-10	-10	absent
AKV1	AKP1	AKV	AKP	AKV1AKP1	UY	2	-10	1.4e-08	-7.85305	-10.6928	0.00112418	-10	-10	absent
AKV1	ALG1	AKV	ALG	AKV1ALG1	Glycerol	2	-10	1.94e-08	-7.71275	-15.259	0.775317	-10	-0.0464457	absent
AKV1	ALG1	AKV	ALG	AKV1ALG1	Glycerol	1	-10	7.72e-09	-8.11232	-16.0581	0.775317	-10	-0.0464457	absent
AKV1	ALG1	AKV	ALG	AKV1ALG1	Glucose	1	-10	6.11e-09	-8.21366	-16.2608	0.775317	-10	-0.141619	absent
AKV1	ALG1	AKV	ALG	AKV1ALG1	Glucose	2	-10	1.32e-08	-7.87867	-15.5908	0.775317	-10	-0.141619	absent
AKV1	ALG1	AKV	ALG	AKV1ALG1	UY	1	-10	3.06e-08	-7.51367	-14.8608	0.775317	-10	-10	absent
AKV1	ALG1	AKV	ALG	AKV1ALG1	UY	2	-10	1.4e-08	-7.85305	-15.5396	0.775317	-10	-10	absent
AKV1	ANG1	AKV	ANG	AKV1ANG1	Glycerol	2	-10	1.94e-08	-7.71275	-15.6406	1.32204	-10	-1	absent
AKV1	ANG1	AKV	ANG	AKV1ANG1	Glycerol	1	-10	7.72e-09	-8.11232	-16.4397	1.32204	-10	-1	absent
AKV1	ANG1	AKV	ANG	AKV1ANG1	Glucose	1	-10	6.11e-09	-8.21366	-16.6424	1.32204	-10	0.0663533	absent
AKV1	ANG1	AKV	ANG	AKV1ANG1	Glucose	2	-10	1.32e-08	-7.87867	-15.9724	1.32204	-10	0.0663533	absent
AKV1	ANG1	AKV	ANG	AKV1ANG1	UY	1	-10	3.06e-08	-7.51367	-15.2424	1.32204	-10	-10	absent
AKV1	ANG1	AKV	ANG	AKV1ANG1	UY	2	-10	1.4e-08	-7.85305	-15.9212	1.32204	-10	-10	absent
AKV1	AIM1	AKV	AIM	AKV1AIM1	Glycerol	2	-10	1.94e-08	-7.71275	-15.4262	0.272524	-10	-10	absent
AKV1	AIM1	AKV	AIM	AKV1AIM1	Glycerol	1	-10	7.72e-09	-8.11232	-16.2254	0.272524	-10	-10	absent
AKV1	AIM1	AKV	AIM	AKV1AIM1	Glucose	1	-10	6.11e-09	-8.21366	-16.428	0.272524	-10	-10	absent
AKV1	AIM1	AKV	AIM	AKV1AIM1	Glucose	2	-10	1.32e-08	-7.87867	-15.7581	0.272524	-10	-10	absent
AKV1	AIM1	AKV	AIM	AKV1AIM1	UY	1	-10	3.06e-08	-7.51367	-15.0281	0.272524	-10	-10	absent
AKV1	AIM1	AKV	AIM	AKV1AIM1	UY	2	-10	1.4e-08	-7.85305	-15.7068	0.272524	-10	-10	absent
AKV1	AKV1	AKV	AKV	AKV1AKV1	Glycerol	2	-1	1.94e-08	-7.71275	-10.3176	0	-10	-0.0735332	absent
AKV1	AKV1	AKV	AKV	AKV1AKV1	Glycerol	1	-1	7.72e-09	-8.11232	-11.1059	0	-10	-0.0735332	absent
AKV1	AKV1	AKV	AKV	AKV1AKV1	Glucose	1	-0.030873	6.11e-09	-8.21366	-10.9644	0	-10	-0.033945	absent
AKV1	AKV1	AKV	AKV	AKV1AKV1	Glucose	2	-0.030873	1.32e-08	-7.87867	-10.5711	0	-10	-0.033945	absent
AKV1	AKV1	AKV	AKV	AKV1AKV1	UY	1	-10	3.06e-08	-7.51367	-10.29	0	-10	-10	absent
AKV1	AKV1	AKV	AKV	AKV1AKV1	UY	2	-10	1.4e-08	-7.85305	-10.8791	0	-10	-10	absent
AKV1	BBI1	AKV	BBI	AKV1BBI1	Glycerol	2	-10	1.94e-08	-7.71275	-14.629	0.199294	-10	-0.0628554	absent
AKV1	BBI1	AKV	BBI	AKV1BBI1	Glycerol	1	-10	7.72e-09	-8.11232	-15.4282	0.199294	-10	-0.0628554	absent
AKV1	BBI1	AKV	BBI	AKV1BBI1	Glucose	1	-10	6.11e-09	-8.21366	-13.8596	0.199294	-10	0.0118567	absent
AKV1	BBI1	AKV	BBI	AKV1BBI1	Glucose	2	-10	1.32e-08	-7.87867	-14.9609	0.199294	-10	0.0118567	absent
AKV1	BBI1	AKV	BBI	AKV1BBI1	UY	1	-10	3.06e-08	-7.51367	-14.2309	0.199294	-10	-10	absent
AKV1	BBI1	AKV	BBI	AKV1BBI1	UY	2	-10	1.4e-08	-7.85305	-14.9096	0.199294	-10	-10	absent
AKV1	BAK1	AKV	BAK	AKV1BAK1	Glycerol	2	0.121635	1.94e-08	-7.71275	-15.178	1.46399	-10	-0.00177197	absent
AKV1	BAK1	AKV	BAK	AKV1BAK1	Glycerol	1	0.121635	7.72e-09	-8.11232	-12.5799	1.46399	-10	-0.00177197	absent
AKV1	BAK1	AKV	BAK	AKV1BAK1	Glucose	1	0.0562078	6.11e-09	-8.21366	-12.1241	1.46399	-10	0.0639478	absent
AKV1	BAK1	AKV	BAK	AKV1BAK1	Glucose	2	0.0562078	1.32e-08	-7.87867	-11.8464	1.46399	-10	0.0639478	absent
AKV1	BAK1	AKV	BAK	AKV1BAK1	UY	1	-10	3.06e-08	-7.51367	-11.1902	1.46399	-10	-10	absent
AKV1	BAK1	AKV	BAK	AKV1BAK1	UY	2	-10	1.4e-08	-7.85305	-11.4242	1.46399	-10	-10	absent
AKV1	BEH1	AKV	BEH	AKV1BEH1	Glycerol	2	-10	1.94e-08	-7.71275	-14.8611	1.45872	-10	-1	absent
AKV1	BEH1	AKV	BEH	AKV1BEH1	Glycerol	1	-10	7.72e-09	-8.11232	-15.6602	1.45872	-10	-1	absent
AKV1	BEH1	AKV	BEH	AKV1BEH1	Glucose	1	-10	6.11e-09	-8.21366	-15.8629	1.45872	-10	-0.0314472	absent
AKV1	BEH1	AKV	BEH	AKV1BEH1	Glucose	2	-10	1.32e-08	-7.87867	-15.1929	1.45872	-10	-0.0314472	absent
AKV1	BEH1	AKV	BEH	AKV1BEH1	UY	1	-10	3.06e-08	-7.51367	-14.4629	1.45872	-10	-10	absent
AKV1	BEH1	AKV	BEH	AKV1BEH1	UY	2	-10	1.4e-08	-7.85305	-15.1417	1.45872	-10	-10	absent
AKV1	BLA1	AKV	BLA	AKV1BLA1	Glycerol	2	-10	1.94e-08	-7.71275	-11.8341	0.186532	-10	-10	absent
AKV1	BLA1	AKV	BLA	AKV1BLA1	Glycerol	1	-10	7.72e-09	-8.11232	-15.7776	0.186532	-10	-10	absent
AKV1	BLA1	AKV	BLA	AKV1BLA1	Glucose	1	0.0412708	6.11e-09	-8.21366	-11.7584	0.186532	-10	-10	absent
AKV1	BLA1	AKV	BLA	AKV1BLA1	Glucose	2	0.0412708	1.32e-08	-7.87867	-15.3103	0.186532	-10	-10	absent
AKV1	BLA1	AKV	BLA	AKV1BLA1	UY	1	-10	3.06e-08	-7.51367	-12.8745	0.186532	-10	-10	absent
AKV1	BLA1	AKV	BLA	AKV1BLA1	UY	2	-10	1.4e-08	-7.85305	-11.6266	0.186532	-10	-10	absent
AKV1	BHM1	AKV	BHM	AKV1BHM1	Glycerol	2	-10	1.94e-08	-7.71275	-15.2429	0.27514	-10	-1	absent
AKV1	BHM1	AKV	BHM	AKV1BHM1	Glycerol	1	-10	7.72e-09	-8.11232	-16.042	0.27514	-10	-1	absent
AKV1	BHM1	AKV	BHM	AKV1BHM1	Glucose	1	-10	6.11e-09	-8.21366	-16.2447	0.27514	-10	-10	absent
AKV1	BHM1	AKV	BHM	AKV1BHM1	Glucose	2	-10	1.32e-08	-7.87867	-15.5747	0.27514	-10	-10	absent
AKV1	BHM1	AKV	BHM	AKV1BHM1	UY	1	-10	3.06e-08	-7.51367	-14.8447	0.27514	-10	-10	absent
AKV1	BHM1	AKV	BHM	AKV1BHM1	UY	2	-10	1.4e-08	-7.85305	-15.5235	0.27514	-10	-10	absent
AKV1	BHN1	AKV	BHN	AKV1BHN1	Glycerol	2	-10	1.94e-08	-7.71275	-11.2084	0.202943	-10	-1	absent
AKV1	BHN1	AKV	BHN	AKV1BHN1	Glycerol	1	-10	7.72e-09	-8.11232	-11.5465	0.202943	-10	-1	absent
AKV1	BHN1	AKV	BHN	AKV1BHN1	Glucose	1	-0.0530312	6.11e-09	-8.21366	-11.3696	0.202943	-10	-1	absent
AKV1	BHN1	AKV	BHN	AKV1BHN1	Glucose	2	-0.0530312	1.32e-08	-7.87867	-10.8895	0.202943	-10	-1	absent
AKV1	BHN1	AKV	BHN	AKV1BHN1	UY	1	-10	3.06e-08	-7.51367	-10.6982	0.202943	-10	-10	absent
AKV1	BHN1	AKV	BHN	AKV1BHN1	UY	2	-10	1.4e-08	-7.85305	-11.6014	0.202943	-10	-10	absent
AKV1	BHB1	AKV	BHB	AKV1BHB1	Glycerol	2	-10	1.94e-08	-7.71275	-11.0431	0.273139	-10	-10	absent
AKV1	BHB1	AKV	BHB	AKV1BHB1	Glycerol	1	-10	7.72e-09	-8.11232	-11.5245	0.273139	-10	-10	absent
AKV1	BHB1	AKV	BHB	AKV1BHB1	Glucose	1	-1	6.11e-09	-8.21366	-10.6849	0.273139	-10	-10	absent
AKV1	BHB1	AKV	BHB	AKV1BHB1	Glucose	2	-1	1.32e-08	-7.87867	-10.4532	0.273139	-10	-10	absent
AKV1	BHB1	AKV	BHB	AKV1BHB1	UY	1	-10	3.06e-08	-7.51367	-10.0835	0.273139	-10	-10	absent
AKV1	BHB1	AKV	BHB	AKV1BHB1	UY	2	-10	1.4e-08	-7.85305	-11.9262	0.273139	-10	-10	absent
AKV1	BLE1	AKV	BLE	AKV1BLE1	Glycerol	2	-10	1.94e-08	-7.71275	-10.3525	0.184858	-10	-0.044381	absent
AKV1	BLE1	AKV	BLE	AKV1BLE1	Glycerol	1	-10	7.72e-09	-8.11232	-10.6858	0.184858	-10	-0.044381	absent
AKV1	BLE1	AKV	BLE	AKV1BLE1	Glucose	1	-10	6.11e-09	-8.21366	-11.2267	0.184858	-10	-0.0748489	absent
AKV1	BLE1	AKV	BLE	AKV1BLE1	Glucose	2	-10	1.32e-08	-7.87867	-10.8999	0.184858	-10	-0.0748489	absent
AKV1	BLE1	AKV	BLE	AKV1BLE1	UY	1	-10	3.06e-08	-7.51367	-10.4293	0.184858	-10	-10	absent
AKV1	BLE1	AKV	BLE	AKV1BLE1	UY	2	-10	1.4e-08	-7.85305	-10.5967	0.184858	-10	-10	absent
AKV1	BHF1	AKV	BHF	AKV1BHF1	Glycerol	2	-0.033358	1.94e-08	-7.71275	-11.8846	0.181954	-10	0.0945635	absent
AKV1	BHF1	AKV	BHF	AKV1BHF1	Glycerol	1	-0.033358	7.72e-09	-8.11232	-15.8721	0.181954	-10	0.0945635	absent
AKV1	BHF1	AKV	BHF	AKV1BHF1	Glucose	1	-0.00601464	6.11e-09	-8.21366	-11.5618	0.181954	-10	0.0612509	absent
AKV1	BHF1	AKV	BHF	AKV1BHF1	Glucose	2	-0.00601464	1.32e-08	-7.87867	-11.5285	0.181954	-10	0.0612509	absent
AKV1	BHF1	AKV	BHF	AKV1BHF1	UY	1	-10	3.06e-08	-7.51367	-10.5599	0.181954	-10	-10	absent
AKV1	BHF1	AKV	BHF	AKV1BHF1	UY	2	-10	1.4e-08	-7.85305	-15.3535	0.181954	-10	-10	absent
AKV1	BKR1	AKV	BKR	AKV1BKR1	Glycerol	2	-0.0570877	1.94e-08	-7.71275	-11.2974	0.194512	-10	-1	absent
AKV1	BKR1	AKV	BKR	AKV1BKR1	Glycerol	1	-0.0570877	7.72e-09	-8.11232	-11.5362	0.194512	-10	-1	absent
AKV1	BKR1	AKV	BKR	AKV1BKR1	Glucose	1	-0.0252852	6.11e-09	-8.21366	-11.7163	0.194512	-10	-0.013402	absent
AKV1	BKR1	AKV	BKR	AKV1BKR1	Glucose	2	-0.0252852	1.32e-08	-7.87867	-11.0232	0.194512	-10	-0.013402	absent
AKV1	BKR1	AKV	BKR	AKV1BKR1	UY	1	-10	3.06e-08	-7.51367	-10.4958	0.194512	-10	-10	absent
AKV1	BKR1	AKV	BKR	AKV1BKR1	UY	2	-10	1.4e-08	-7.85305	-11.1252	0.194512	-10	-10	absent
AKV1	BLL1	AKV	BLL	AKV1BLL1	Glycerol	2	-0.0290336	1.94e-08	-7.71275	-11.3536	0.191344	-10	0.120353	absent
AKV1	BLL1	AKV	BLL	AKV1BLL1	Glycerol	1	-0.0290336	7.72e-09	-8.11232	-12.3176	0.191344	-10	0.120353	absent
AKV1	BLL1	AKV	BLL	AKV1BLL1	Glucose	1	-0.0538701	6.11e-09	-8.21366	-11.4023	0.191344	-10	-1	absent
AKV1	BLL1	AKV	BLL	AKV1BLL1	Glucose	2	-0.0538701	1.32e-08	-7.87867	-11.3307	0.191344	-10	-1	absent
AKV1	BLL1	AKV	BLL	AKV1BLL1	UY	1	-10	3.06e-08	-7.51367	-10.3493	0.191344	-10	-10	absent
AKV1	BLL1	AKV	BLL	AKV1BLL1	UY	2	-10	1.4e-08	-7.85305	-11.594	0.191344	-10	-10	absent
AKV1	BNI1	AKV	BNI	AKV1BNI1	Glycerol	2	-10	1.94e-08	-7.71275	-11.6503	0.195029	-10	-10	absent
AKV1	BNI1	AKV	BNI	AKV1BNI1	Glycerol	1	-10	7.72e-09	-8.11232	-13.0348	0.195029	-10	-10	absent
AKV1	BNI1	AKV	BNI	AKV1BNI1	Glucose	1	-10	6.11e-09	-8.21366	-12.3741	0.195029	-10	-10	absent
AKV1	BNI1	AKV	BNI	AKV1BNI1	Glucose	2	-10	1.32e-08	-7.87867	-12.358	0.195029	-10	-10	absent
AKV1	BNI1	AKV	BNI	AKV1BNI1	UY	1	-10	3.06e-08	-7.51367	-14.8298	0.195029	-10	-10	absent
AKV1	BNI1	AKV	BNI	AKV1BNI1	UY	2	-10	1.4e-08	-7.85305	-15.5086	0.195029	-10	-10	absent
AKV1	BQG1	AKV	BQG	AKV1BQG1	Glycerol	2	-0.0650156	1.94e-08	-7.71275	-10.9911	0.191731	-10	0.0537228	absent
AKV1	BQG1	AKV	BQG	AKV1BQG1	Glycerol	1	-0.0650156	7.72e-09	-8.11232	-11.6685	0.191731	-10	0.0537228	absent
AKV1	BQG1	AKV	BQG	AKV1BQG1	Glucose	1	0.00525719	6.11e-09	-8.21366	-11.5658	0.191731	-10	-0.0571925	absent
AKV1	BQG1	AKV	BQG	AKV1BQG1	Glucose	2	0.00525719	1.32e-08	-7.87867	-11.1389	0.191731	-10	-0.0571925	absent
AKV1	BQG1	AKV	BQG	AKV1BQG1	UY	1	-10	3.06e-08	-7.51367	-10.1879	0.191731	-10	-10	absent
AKV1	BQG1	AKV	BQG	AKV1BQG1	UY	2	-10	1.4e-08	-7.85305	-11.1888	0.191731	-10	-10	absent
AKV1	BNK1	AKV	BNK	AKV1BNK1	Glycerol	2	-0.000135143	1.94e-08	-7.71275	-10.6972	0.188307	-10	0.115878	absent
AKV1	BNK1	AKV	BNK	AKV1BNK1	Glycerol	1	-0.000135143	7.72e-09	-8.11232	-11.0468	0.188307	-10	0.115878	absent
AKV1	BNK1	AKV	BNK	AKV1BNK1	Glucose	1	-0.0203228	6.11e-09	-8.21366	-11.0724	0.188307	-10	-0.0796816	absent
AKV1	BNK1	AKV	BNK	AKV1BNK1	Glucose	2	-0.0203228	1.32e-08	-7.87867	-10.9557	0.188307	-10	-0.0796816	absent
AKV1	BNK1	AKV	BNK	AKV1BNK1	UY	1	-10	3.06e-08	-7.51367	-10.1007	0.188307	-10	-10	absent
AKV1	BNK1	AKV	BNK	AKV1BNK1	UY	2	-10	1.4e-08	-7.85305	-10.915	0.188307	-10	-10	absent
AKV1	BPQ1	AKV	BPQ	AKV1BPQ1	Glycerol	2	-0.029932	1.94e-08	-7.71275	-10.7506	0.216897	-10	0.0632255	absent
AKV1	BPQ1	AKV	BPQ	AKV1BPQ1	Glycerol	1	-0.029932	7.72e-09	-8.11232	-10.9344	0.216897	-10	0.0632255	absent
AKV1	BPQ1	AKV	BPQ	AKV1BPQ1	Glucose	1	0.0258736	6.11e-09	-8.21366	-11.3267	0.216897	-10	0.00714221	absent
AKV1	BPQ1	AKV	BPQ	AKV1BPQ1	Glucose	2	0.0258736	1.32e-08	-7.87867	-11.0243	0.216897	-10	0.00714221	absent
AKV1	BPQ1	AKV	BPQ	AKV1BPQ1	UY	1	-10	3.06e-08	-7.51367	-10.6691	0.216897	-10	-10	absent
AKV1	BPQ1	AKV	BPQ	AKV1BPQ1	UY	2	-10	1.4e-08	-7.85305	-10.7599	0.216897	-10	-10	absent
AKV1	BQH1	AKV	BQH	AKV1BQH1	Glycerol	2	-10	1.94e-08	-7.71275	-15.6226	0.18922	-10	-1	absent
AKV1	BQH1	AKV	BQH	AKV1BQH1	Glycerol	1	-10	7.72e-09	-8.11232	-16.4218	0.18922	-10	-1	absent
AKV1	BQH1	AKV	BQH	AKV1BQH1	Glucose	1	-0.0410037	6.11e-09	-8.21366	-13.1849	0.18922	-10	0.0201877	absent
AKV1	BQH1	AKV	BQH	AKV1BQH1	Glucose	2	-0.0410037	1.32e-08	-7.87867	-15.9545	0.18922	-10	0.0201877	absent
AKV1	BQH1	AKV	BQH	AKV1BQH1	UY	1	-10	3.06e-08	-7.51367	-15.2245	0.18922	-10	-10	absent
AKV1	BQH1	AKV	BQH	AKV1BQH1	UY	2	-10	1.4e-08	-7.85305	-15.9032	0.18922	-10	-10	absent
AKV1	BRA1	AKV	BRA	AKV1BRA1	Glycerol	2	-10	1.94e-08	-7.71275	-10.5925	0.20499	-10	-1	absent
AKV1	BRA1	AKV	BRA	AKV1BRA1	Glycerol	1	-10	7.72e-09	-8.11232	-11.156	0.20499	-10	-1	absent
AKV1	BRA1	AKV	BRA	AKV1BRA1	Glucose	1	-10	6.11e-09	-8.21366	-11.3343	0.20499	-10	-0.0988197	absent
AKV1	BRA1	AKV	BRA	AKV1BRA1	Glucose	2	-10	1.32e-08	-7.87867	-10.8601	0.20499	-10	-0.0988197	absent
AKV1	BRA1	AKV	BRA	AKV1BRA1	UY	1	-10	3.06e-08	-7.51367	-10.5941	0.20499	-10	-10	absent
AKV1	BRA1	AKV	BRA	AKV1BRA1	UY	2	-10	1.4e-08	-7.85305	-11.3045	0.20499	-10	-10	absent
AKV1	BLN1	AKV	BLN	AKV1BLN1	Glycerol	2	-10	1.94e-08	-7.71275	-15.1089	0.186252	-10	-10	absent
AKV1	BLN1	AKV	BLN	AKV1BLN1	Glycerol	1	-10	7.72e-09	-8.11232	-15.908	0.186252	-10	-10	absent
AKV1	BLN1	AKV	BLN	AKV1BLN1	Glucose	1	-10	6.11e-09	-8.21366	-12.3751	0.186252	-10	-10	absent
AKV1	BLN1	AKV	BLN	AKV1BLN1	Glucose	2	-10	1.32e-08	-7.87867	-11.9484	0.186252	-10	-10	absent
AKV1	BLN1	AKV	BLN	AKV1BLN1	UY	1	-10	3.06e-08	-7.51367	-14.7107	0.186252	-10	-10	absent
AKV1	BLN1	AKV	BLN	AKV1BLN1	UY	2	-10	1.4e-08	-7.85305	-11.5837	0.186252	-10	-10	absent
AKV1	BQI1	AKV	BQI	AKV1BQI1	Glycerol	2	-10	1.94e-08	-7.71275	-15.2751	0.188267	-10	-0.01173	absent
AKV1	BQI1	AKV	BQI	AKV1BQI1	Glycerol	1	-10	7.72e-09	-8.11232	-12.5479	0.188267	-10	-0.01173	absent
AKV1	BQI1	AKV	BQI	AKV1BQI1	Glucose	1	-0.0118848	6.11e-09	-8.21366	-12.9785	0.188267	-10	-0.108288	absent
AKV1	BQI1	AKV	BQI	AKV1BQI1	Glucose	2	-0.0118848	1.32e-08	-7.87867	-12.365	0.188267	-10	-0.108288	absent
AKV1	BQI1	AKV	BQI	AKV1BQI1	UY	1	-10	3.06e-08	-7.51367	-10.9745	0.188267	-10	-10	absent
AKV1	BQI1	AKV	BQI	AKV1BQI1	UY	2	-10	1.4e-08	-7.85305	-11.2851	0.188267	-10	-10	absent
AKV1	BRB1	AKV	BRB	AKV1BRB1	Glycerol	2	-0.0496848	1.94e-08	-7.71275	-11.024	0.258693	-10	0.000627839	absent
AKV1	BRB1	AKV	BRB	AKV1BRB1	Glycerol	1	-0.0496848	7.72e-09	-8.11232	-11.8497	0.258693	-10	0.000627839	absent
AKV1	BRB1	AKV	BRB	AKV1BRB1	Glucose	1	0.0206233	6.11e-09	-8.21366	-10.6969	0.258693	-10	0.0350566	absent
AKV1	BRB1	AKV	BRB	AKV1BRB1	Glucose	2	0.0206233	1.32e-08	-7.87867	-10.3198	0.258693	-10	0.0350566	absent
AKV1	BRB1	AKV	BRB	AKV1BRB1	UY	1	-10	3.06e-08	-7.51367	-10.2141	0.258693	-10	-10	absent
AKV1	BRB1	AKV	BRB	AKV1BRB1	UY	2	-10	1.4e-08	-7.85305	-11.1973	0.258693	-10	-10	absent
AKV1	BLP1	AKV	BLP	AKV1BLP1	Glycerol	2	-0.0344127	1.94e-08	-7.71275	-15.1917	0.186702	-10	0.0191829	absent
AKV1	BLP1	AKV	BLP	AKV1BLP1	Glycerol	1	-0.0344127	7.72e-09	-8.11232	-12.2689	0.186702	-10	0.0191829	absent
AKV1	BLP1	AKV	BLP	AKV1BLP1	Glucose	1	0.0184917	6.11e-09	-8.21366	-16.1935	0.186702	-10	0.0477277	absent
AKV1	BLP1	AKV	BLP	AKV1BLP1	Glucose	2	0.0184917	1.32e-08	-7.87867	-15.5235	0.186702	-10	0.0477277	absent
AKV1	BLP1	AKV	BLP	AKV1BLP1	UY	1	-10	3.06e-08	-7.51367	-14.7935	0.186702	-10	-10	absent
AKV1	BLP1	AKV	BLP	AKV1BLP1	UY	2	-10	1.4e-08	-7.85305	-15.4722	0.186702	-10	-10	absent
AKV1	BRC1	AKV	BRC	AKV1BRC1	Glycerol	2	-10	1.94e-08	-7.71275	-10.6578	0.19795	-10	-0.0845599	absent
AKV1	BRC1	AKV	BRC	AKV1BRC1	Glycerol	1	-10	7.72e-09	-8.11232	-10.8654	0.19795	-10	-0.0845599	absent
AKV1	BRC1	AKV	BRC	AKV1BRC1	Glucose	1	-0.000504864	6.11e-09	-8.21366	-10.8609	0.19795	-10	-0.0843597	absent
AKV1	BRC1	AKV	BRC	AKV1BRC1	Glucose	2	-0.000504864	1.32e-08	-7.87867	-10.6521	0.19795	-10	-0.0843597	absent
AKV1	BRC1	AKV	BRC	AKV1BRC1	UY	1	-10	3.06e-08	-7.51367	-11.3129	0.19795	-10	-10	absent
AKV1	BRC1	AKV	BRC	AKV1BRC1	UY	2	-10	1.4e-08	-7.85305	-10.8914	0.19795	-10	-10	absent
AKV1	BPT1	AKV	BPT	AKV1BPT1	Glycerol	2	-1	1.94e-08	-7.71275	-11.1756	0.188255	-10	0.0527905	absent
AKV1	BPT1	AKV	BPT	AKV1BPT1	Glycerol	1	-1	7.72e-09	-8.11232	-11.2576	0.188255	-10	0.0527905	absent
AKV1	BPT1	AKV	BPT	AKV1BPT1	Glucose	1	-0.0174869	6.11e-09	-8.21366	-11.65	0.188255	-10	-0.0226414	absent
AKV1	BPT1	AKV	BPT	AKV1BPT1	Glucose	2	-0.0174869	1.32e-08	-7.87867	-11.3844	0.188255	-10	-0.0226414	absent
AKV1	BPT1	AKV	BPT	AKV1BPT1	UY	1	-10	3.06e-08	-7.51367	-10.5874	0.188255	-10	-10	absent
AKV1	BPT1	AKV	BPT	AKV1BPT1	UY	2	-10	1.4e-08	-7.85305	-11.1693	0.188255	-10	-10	absent
AKV1	BRD1	AKV	BRD	AKV1BRD1	Glycerol	2	-0.0459358	1.94e-08	-7.71275	-15.1555	0.183545	-10	0.10436	absent
AKV1	BRD1	AKV	BRD	AKV1BRD1	Glycerol	1	-0.0459358	7.72e-09	-8.11232	-12.1106	0.183545	-10	0.10436	absent
AKV1	BRD1	AKV	BRD	AKV1BRD1	Glucose	1	0.00577745	6.11e-09	-8.21366	-11.2474	0.183545	-10	-0.0248454	absent
AKV1	BRD1	AKV	BRD	AKV1BRD1	Glucose	2	0.00577745	1.32e-08	-7.87867	-10.9151	0.183545	-10	-0.0248454	absent
AKV1	BRD1	AKV	BRD	AKV1BRD1	UY	1	-10	3.06e-08	-7.51367	-11.0648	0.183545	-10	-10	absent
AKV1	BRD1	AKV	BRD	AKV1BRD1	UY	2	-10	1.4e-08	-7.85305	-11.7502	0.183545	-10	-10	absent
AKV1	BMK1	AKV	BMK	AKV1BMK1	Glycerol	2	-10	1.94e-08	-7.71275	-11.7187	0.182602	-10	0.0727937	absent
AKV1	BMK1	AKV	BMK	AKV1BMK1	Glycerol	1	-10	7.72e-09	-8.11232	-15.6933	0.182602	-10	0.0727937	absent
AKV1	BMK1	AKV	BMK	AKV1BMK1	Glucose	1	0.00289475	6.11e-09	-8.21366	-11.1874	0.182602	-10	0.0206207	absent
AKV1	BMK1	AKV	BMK	AKV1BMK1	Glucose	2	0.00289475	1.32e-08	-7.87867	-10.9018	0.182602	-10	0.0206207	absent
AKV1	BMK1	AKV	BMK	AKV1BMK1	UY	1	-10	3.06e-08	-7.51367	-10.4569	0.182602	-10	-10	absent
AKV1	BMK1	AKV	BMK	AKV1BMK1	UY	2	-10	1.4e-08	-7.85305	-11.7917	0.182602	-10	-10	absent
AKV1	BQP1	AKV	BQP	AKV1BQP1	Glycerol	2	-10	1.94e-08	-7.71275	-15.0291	0.222735	-10	-0.0301991	absent
AKV1	BQP1	AKV	BQP	AKV1BQP1	Glycerol	1	-10	7.72e-09	-8.11232	-11.9321	0.222735	-10	-0.0301991	absent
AKV1	BQP1	AKV	BQP	AKV1BQP1	Glucose	1	0.00144969	6.11e-09	-8.21366	-11.1342	0.222735	-10	0.0119541	absent
AKV1	BQP1	AKV	BQP	AKV1BQP1	Glucose	2	0.00144969	1.32e-08	-7.87867	-10.6519	0.222735	-10	0.0119541	absent
AKV1	BQP1	AKV	BQP	AKV1BQP1	UY	1	-10	3.06e-08	-7.51367	-10.9258	0.222735	-10	-10	absent
AKV1	BQP1	AKV	BQP	AKV1BQP1	UY	2	-10	1.4e-08	-7.85305	-15.3097	0.222735	-10	-10	absent
AKV1	BLV1	AKV	BLV	AKV1BLV1	Glycerol	2	-0.0175543	1.94e-08	-7.71275	-11.4948	0.191622	-10	0.0838921	absent
AKV1	BLV1	AKV	BLV	AKV1BLV1	Glycerol	1	-0.0175543	7.72e-09	-8.11232	-12.6267	0.191622	-10	0.0838921	absent
AKV1	BLV1	AKV	BLV	AKV1BLV1	Glucose	1	0.0152851	6.11e-09	-8.21366	-12.652	0.191622	-10	-0.0681483	absent
AKV1	BLV1	AKV	BLV	AKV1BLV1	Glucose	2	0.0152851	1.32e-08	-7.87867	-11.8209	0.191622	-10	-0.0681483	absent
AKV1	BLV1	AKV	BLV	AKV1BLV1	UY	1	-10	3.06e-08	-7.51367	-14.7138	0.191622	-10	-10	absent
AKV1	BLV1	AKV	BLV	AKV1BLV1	UY	2	-10	1.4e-08	-7.85305	-15.3925	0.191622	-10	-10	absent
AKV1	BQQ1	AKV	BQQ	AKV1BQQ1	Glycerol	2	-10	1.94e-08	-7.71275	-15.6001	0.188479	-10	0.0824425	absent
AKV1	BQQ1	AKV	BQQ	AKV1BQQ1	Glycerol	1	-10	7.72e-09	-8.11232	-16.3993	0.188479	-10	0.0824425	absent
AKV1	BQQ1	AKV	BQQ	AKV1BQQ1	Glucose	1	-10	6.11e-09	-8.21366	-13.1505	0.188479	-10	0.0291802	absent
AKV1	BQQ1	AKV	BQQ	AKV1BQQ1	Glucose	2	-10	1.32e-08	-7.87867	-15.932	0.188479	-10	0.0291802	absent
AKV1	BQQ1	AKV	BQQ	AKV1BQQ1	UY	1	-10	3.06e-08	-7.51367	-15.202	0.188479	-10	-10	absent
AKV1	BQQ1	AKV	BQQ	AKV1BQQ1	UY	2	-10	1.4e-08	-7.85305	-15.8807	0.188479	-10	-10	absent
AKV1	BMA1	AKV	BMA	AKV1BMA1	Glycerol	2	0.00390182	1.94e-08	-7.71275	-11.362	1.55964	-10	0.0885346	absent
AKV1	BMA1	AKV	BMA	AKV1BMA1	Glycerol	1	0.00390182	7.72e-09	-8.11232	-15.8587	1.55964	-10	0.0885346	absent
AKV1	BMA1	AKV	BMA	AKV1BMA1	Glucose	1	-10	6.11e-09	-8.21366	-11.6989	1.55964	-10	0.0277247	absent
AKV1	BMA1	AKV	BMA	AKV1BMA1	Glucose	2	-10	1.32e-08	-7.87867	-11.3901	1.55964	-10	0.0277247	absent
AKV1	BMA1	AKV	BMA	AKV1BMA1	UY	1	-10	3.06e-08	-7.51367	-14.6614	1.55964	-10	-10	absent
AKV1	BMA1	AKV	BMA	AKV1BMA1	UY	2	-10	1.4e-08	-7.85305	-11.3252	1.55964	-10	-10	absent
AKV1	BQR1	AKV	BQR	AKV1BQR1	Glycerol	2	-0.0246417	1.94e-08	-7.71275	-11.121	0.184058	-10	0.0588489	absent
AKV1	BQR1	AKV	BQR	AKV1BQR1	Glycerol	1	-0.0246417	7.72e-09	-8.11232	-11.7045	0.184058	-10	0.0588489	absent
AKV1	BQR1	AKV	BQR	AKV1BQR1	Glucose	1	-0.029942	6.11e-09	-8.21366	-12.4336	0.184058	-10	-0.0545715	absent
AKV1	BQR1	AKV	BQR	AKV1BQR1	Glucose	2	-0.029942	1.32e-08	-7.87867	-11.3293	0.184058	-10	-0.0545715	absent
AKV1	BQR1	AKV	BQR	AKV1BQR1	UY	1	-10	3.06e-08	-7.51367	-10.5738	0.184058	-10	-10	absent
AKV1	BQR1	AKV	BQR	AKV1BQR1	UY	2	-10	1.4e-08	-7.85305	-11.2	0.184058	-10	-10	absent
AKV1	CAD1	AKV	CAD	AKV1CAD1	Glycerol	2	-10	1.94e-08	-7.71275	-14.7785	0.332942	-10	-10	absent
AKV1	CAD1	AKV	CAD	AKV1CAD1	Glycerol	1	-10	7.72e-09	-8.11232	-15.5776	0.332942	-10	-10	absent
AKV1	CAD1	AKV	CAD	AKV1CAD1	Glucose	1	-10	6.11e-09	-8.21366	-15.7803	0.332942	-10	-0.0194773	absent
AKV1	CAD1	AKV	CAD	AKV1CAD1	Glucose	2	-10	1.32e-08	-7.87867	-15.1103	0.332942	-10	-0.0194773	absent
AKV1	CAD1	AKV	CAD	AKV1CAD1	UY	1	-10	3.06e-08	-7.51367	-14.3803	0.332942	-10	-10	absent
AKV1	CAD1	AKV	CAD	AKV1CAD1	UY	2	-10	1.4e-08	-7.85305	-15.0591	0.332942	-10	-10	absent
AKV1	BSB1	AKV	BSB	AKV1BSB1	Glycerol	2	-10	1.94e-08	-7.71275	-16.045	0.178417	-10	-10	absent
AKV1	BSB1	AKV	BSB	AKV1BSB1	Glycerol	1	-10	7.72e-09	-8.11232	-16.8441	0.178417	-10	-10	absent
AKV1	BSB1	AKV	BSB	AKV1BSB1	Glucose	1	-10	6.11e-09	-8.21366	-12.827	0.178417	-10	-10	absent
AKV1	BSB1	AKV	BSB	AKV1BSB1	Glucose	2	-10	1.32e-08	-7.87867	-13.3028	0.178417	-10	-10	absent
AKV1	BSB1	AKV	BSB	AKV1BSB1	UY	1	-10	3.06e-08	-7.51367	-15.6468	0.178417	-10	-10	absent
AKV1	BSB1	AKV	BSB	AKV1BSB1	UY	2	-10	1.4e-08	-7.85305	-16.3256	0.178417	-10	-10	absent
AKV1	BTH1	AKV	BTH	AKV1BTH1	Glycerol	2	-10	1.94e-08	-7.71275	-10.1274	0.181894	-10	-1	absent
AKV1	BTH1	AKV	BTH	AKV1BTH1	Glycerol	1	-10	7.72e-09	-8.11232	-10.3964	0.181894	-10	-1	absent
AKV1	BTH1	AKV	BTH	AKV1BTH1	Glucose	1	-0.0630631	6.11e-09	-8.21366	-11.17	0.181894	-10	-0.01391	absent
AKV1	BTH1	AKV	BTH	AKV1BTH1	Glucose	2	-0.0630631	1.32e-08	-7.87867	-10.8133	0.181894	-10	-0.01391	absent
AKV1	BTH1	AKV	BTH	AKV1BTH1	UY	1	-10	3.06e-08	-7.51367	-10.6018	0.181894	-10	-10	absent
AKV1	BTH1	AKV	BTH	AKV1BTH1	UY	2	-10	1.4e-08	-7.85305	-10.1399	0.181894	-10	-10	absent
AKV1	AHP1	AKV	AHP	AKV1AHP1	Glycerol	2	-10	1.94e-08	-7.71275	-15.09	0.34189	-10	0.0888156	absent
AKV1	AHP1	AKV	AHP	AKV1AHP1	Glycerol	1	-10	7.72e-09	-8.11232	-15.8891	0.34189	-10	0.0888156	absent
AKV1	AHP1	AKV	AHP	AKV1AHP1	Glucose	1	0.00842671	6.11e-09	-8.21366	-16.0918	0.34189	-10	-1	absent
AKV1	AHP1	AKV	AHP	AKV1AHP1	Glucose	2	0.00842671	1.32e-08	-7.87867	-15.4218	0.34189	-10	-1	absent
AKV1	AHP1	AKV	AHP	AKV1AHP1	UY	1	-10	3.06e-08	-7.51367	-14.6918	0.34189	-10	-10	absent
AKV1	AHP1	AKV	AHP	AKV1AHP1	UY	2	-10	1.4e-08	-7.85305	-15.3706	0.34189	-10	-10	absent
AKV1	CQD1	AKV	CQD	AKV1CQD1	Glycerol	2	-10	1.94e-08	-7.71275	-11.7901	0.770183	-10	-10	absent
AKV1	CQD1	AKV	CQD	AKV1CQD1	Glycerol	1	-10	7.72e-09	-8.11232	-12.1279	0.770183	-10	-10	absent
AKV1	CQD1	AKV	CQD	AKV1CQD1	Glucose	1	0.040525	6.11e-09	-8.21366	-12.1941	0.770183	-10	0.0106465	absent
AKV1	CQD1	AKV	CQD	AKV1CQD1	Glucose	2	0.040525	1.32e-08	-7.87867	-11.6094	0.770183	-10	0.0106465	absent
AKV1	CQD1	AKV	CQD	AKV1CQD1	UY	1	-10	3.06e-08	-7.51367	-14.9678	0.770183	-10	-10	absent
AKV1	CQD1	AKV	CQD	AKV1CQD1	UY	2	-10	1.4e-08	-7.85305	-15.6465	0.770183	-10	-10	absent
AKV1	APV1	AKV	APV	AKV1APV1	Glycerol	2	-0.0652687	1.94e-08	-7.71275	-10.4278	0.183354	-10	0.176787	absent
AKV1	APV1	AKV	APV	AKV1APV1	Glycerol	1	-0.0652687	7.72e-09	-8.11232	-10.8601	0.183354	-10	0.176787	absent
AKV1	APV1	AKV	APV	AKV1APV1	Glucose	1	0.014231	6.11e-09	-8.21366	-11.653	0.183354	-10	-0.0613302	absent
AKV1	APV1	AKV	APV	AKV1APV1	Glucose	2	0.014231	1.32e-08	-7.87867	-11.1328	0.183354	-10	-0.0613302	absent
AKV1	APV1	AKV	APV	AKV1APV1	UY	1	-10	3.06e-08	-7.51367	-10.179	0.183354	-10	-10	absent
AKV1	APV1	AKV	APV	AKV1APV1	UY	2	-10	1.4e-08	-7.85305	-10.9403	0.183354	-10	-10	absent
AKV1	AST1	AKV	AST	AKV1AST1	Glycerol	2	-10	1.94e-08	-7.71275	-10.7007	0.305373	-10	-1	absent
AKV1	AST1	AKV	AST	AKV1AST1	Glycerol	1	-10	7.72e-09	-8.11232	-11.1114	0.305373	-10	-1	absent
AKV1	AST1	AKV	AST	AKV1AST1	Glucose	1	0.0388041	6.11e-09	-8.21366	-11.5868	0.305373	-10	0.0143308	absent
AKV1	AST1	AKV	AST	AKV1AST1	Glucose	2	0.0388041	1.32e-08	-7.87867	-11.2777	0.305373	-10	0.0143308	absent
AKV1	AST1	AKV	AST	AKV1AST1	UY	1	-10	3.06e-08	-7.51367	-11.0129	0.305373	-10	-10	absent
AKV1	AST1	AKV	AST	AKV1AST1	UY	2	-10	1.4e-08	-7.85305	-10.7193	0.305373	-10	-10	absent
AKV1	CCV1	AKV	CCV	AKV1CCV1	Glycerol	2	-10	1.94e-08	-7.71275	-10.5431	1.4545	-10	-1	absent
AKV1	CCV1	AKV	CCV	AKV1CCV1	Glycerol	1	-10	7.72e-09	-8.11232	-11.2584	1.4545	-10	-1	absent
AKV1	CCV1	AKV	CCV	AKV1CCV1	Glucose	1	-0.048277	6.11e-09	-8.21366	-11.7	1.4545	-10	0.044604	absent
AKV1	CCV1	AKV	CCV	AKV1CCV1	Glucose	2	-0.048277	1.32e-08	-7.87867	-11.004	1.4545	-10	0.044604	absent
AKV1	CCV1	AKV	CCV	AKV1CCV1	UY	1	-10	3.06e-08	-7.51367	-10.9473	1.4545	-10	-10	absent
AKV1	CCV1	AKV	CCV	AKV1CCV1	UY	2	-10	1.4e-08	-7.85305	-10.6481	1.4545	-10	-10	absent
AKV1	YAR1	AKV	YAR	AKV1YAR1	Glycerol	2	-10	1.94e-08	-7.71275	-15.3279	0.807327	-10	-1	absent
AKV1	YAR1	AKV	YAR	AKV1YAR1	Glycerol	1	-10	7.72e-09	-8.11232	-16.127	0.807327	-10	-1	absent
AKV1	YAR1	AKV	YAR	AKV1YAR1	Glucose	1	0.0190468	6.11e-09	-8.21366	-12.0829	0.807327	-10	-0.0705407	absent
AKV1	YAR1	AKV	YAR	AKV1YAR1	Glucose	2	0.0190468	1.32e-08	-7.87867	-11.8056	0.807327	-10	-0.0705407	absent
AKV1	YAR1	AKV	YAR	AKV1YAR1	UY	1	-10	3.06e-08	-7.51367	-11.2712	0.807327	-10	-10	absent
AKV1	YAR1	AKV	YAR	AKV1YAR1	UY	2	-10	1.4e-08	-7.85305	-15.6085	0.807327	-10	-10	absent
AKV1	YBU1	AKV	YBU	AKV1YBU1	Glycerol	2	-10	1.94e-08	-7.71275	-10.6056	1.07447	-10	-1	absent
AKV1	YBU1	AKV	YBU	AKV1YBU1	Glycerol	1	-10	7.72e-09	-8.11232	-11.1581	1.07447	-10	-1	absent
AKV1	YBU1	AKV	YBU	AKV1YBU1	Glucose	1	-10	6.11e-09	-8.21366	-16.1021	1.07447	-10	-10	absent
AKV1	YBU1	AKV	YBU	AKV1YBU1	Glucose	2	-10	1.32e-08	-7.87867	-15.4321	1.07447	-10	-10	absent
AKV1	YBU1	AKV	YBU	AKV1YBU1	UY	1	-10	3.06e-08	-7.51367	-14.7021	1.07447	-10	-10	absent
AKV1	YBU1	AKV	YBU	AKV1YBU1	UY	2	-10	1.4e-08	-7.85305	-10.746	1.07447	-10	-10	absent
ANE1	AKB1	ANE	AKB	ANE1AKB1	Glycerol	2	0.098413	1.94e-08	-7.71275	-11.9308	1.11621	0.0364158	-1	absent
ANE1	AKB1	ANE	AKB	ANE1AKB1	Glycerol	1	0.098413	7.72e-09	-8.11232	-12.2218	1.11621	0.0364158	-1	absent
ANE1	AKB1	ANE	AKB	ANE1AKB1	Glucose	1	-10	6.11e-09	-8.21366	-8.72182	1.11621	0.0520262	-0.0154866	absent
ANE1	AKB1	ANE	AKB	ANE1AKB1	Glucose	2	-10	1.32e-08	-7.87867	-9.24835	1.11621	0.0520262	-0.0154866	absent
ANE1	AKB1	ANE	AKB	ANE1AKB1	UY	1	-10	3.06e-08	-7.51367	-11.5773	1.11621	-10	-10	absent
ANE1	AKB1	ANE	AKB	ANE1AKB1	UY	2	-10	1.4e-08	-7.85305	-8.69189	1.11621	-10	-10	absent
ANE1	AKP1	ANE	AKP	ANE1AKP1	Glycerol	2	0.134106	1.94e-08	-7.71275	-10.9736	1.32148	0.0364158	-0.109008	absent
ANE1	AKP1	ANE	AKP	ANE1AKP1	Glycerol	1	0.134106	7.72e-09	-8.11232	-11.6472	1.32148	0.0364158	-0.109008	absent
ANE1	AKP1	ANE	AKP	ANE1AKP1	Glucose	1	0.0629274	6.11e-09	-8.21366	-7.57929	1.32148	0.0520262	-0.0557565	absent
ANE1	AKP1	ANE	AKP	ANE1AKP1	Glucose	2	0.0629274	1.32e-08	-7.87867	-8.13342	1.32148	0.0520262	-0.0557565	absent
ANE1	AKP1	ANE	AKP	ANE1AKP1	UY	1	-10	3.06e-08	-7.51367	-10.8437	1.32148	-10	-10	absent
ANE1	AKP1	ANE	AKP	ANE1AKP1	UY	2	-10	1.4e-08	-7.85305	-7.65525	1.32148	-10	-10	absent
ANE1	ALG1	ANE	ALG	ANE1ALG1	Glycerol	2	-10	1.94e-08	-7.71275	-15.6817	1.00431	0.0364158	-0.0464457	absent
ANE1	ALG1	ANE	ALG	ANE1ALG1	Glycerol	1	-10	7.72e-09	-8.11232	-16.4808	1.00431	0.0364158	-0.0464457	absent
ANE1	ALG1	ANE	ALG	ANE1ALG1	Glucose	1	-10	6.11e-09	-8.21366	-12.8432	1.00431	0.0520262	-0.141619	absent
ANE1	ALG1	ANE	ALG	ANE1ALG1	Glucose	2	-10	1.32e-08	-7.87867	-12.7739	1.00431	0.0520262	-0.141619	absent
ANE1	ALG1	ANE	ALG	ANE1ALG1	UY	1	-10	3.06e-08	-7.51367	-15.2835	1.00431	-10	-10	absent
ANE1	ALG1	ANE	ALG	ANE1ALG1	UY	2	-10	1.4e-08	-7.85305	-12.5021	1.00431	-10	-10	absent
ANE1	ANG1	ANE	ANG	ANE1ANG1	Glycerol	2	-10	1.94e-08	-7.71275	-16.0633	0.00265532	0.0364158	-1	absent
ANE1	ANG1	ANE	ANG	ANE1ANG1	Glycerol	1	-10	7.72e-09	-8.11232	-16.8624	0.00265532	0.0364158	-1	absent
ANE1	ANG1	ANE	ANG	ANE1ANG1	Glucose	1	-10	6.11e-09	-8.21366	-13.2248	0.00265532	0.0520262	0.0663533	absent
ANE1	ANG1	ANE	ANG	ANE1ANG1	Glucose	2	-10	1.32e-08	-7.87867	-13.1556	0.00265532	0.0520262	0.0663533	absent
ANE1	ANG1	ANE	ANG	ANE1ANG1	UY	1	-10	3.06e-08	-7.51367	-15.6651	0.00265532	-10	-10	absent
ANE1	ANG1	ANE	ANG	ANE1ANG1	UY	2	-10	1.4e-08	-7.85305	-12.8837	0.00265532	-10	-10	absent
ANE1	AIM1	ANE	AIM	ANE1AIM1	Glycerol	2	-10	1.94e-08	-7.71275	-15.8489	1.34627	0.0364158	-10	absent
ANE1	AIM1	ANE	AIM	ANE1AIM1	Glycerol	1	-10	7.72e-09	-8.11232	-16.648	1.34627	0.0364158	-10	absent
ANE1	AIM1	ANE	AIM	ANE1AIM1	Glucose	1	-10	6.11e-09	-8.21366	-13.0104	1.34627	0.0520262	-10	absent
ANE1	AIM1	ANE	AIM	ANE1AIM1	Glucose	2	-10	1.32e-08	-7.87867	-12.9412	1.34627	0.0520262	-10	absent
ANE1	AIM1	ANE	AIM	ANE1AIM1	UY	1	-10	3.06e-08	-7.51367	-15.4507	1.34627	-10	-10	absent
ANE1	AIM1	ANE	AIM	ANE1AIM1	UY	2	-10	1.4e-08	-7.85305	-12.6693	1.34627	-10	-10	absent
ANE1	AKV1	ANE	AKV	ANE1AKV1	Glycerol	2	0.124372	1.94e-08	-7.71275	-10.7402	1.32135	0.0364158	-0.0735332	absent
ANE1	AKV1	ANE	AKV	ANE1AKV1	Glycerol	1	0.124372	7.72e-09	-8.11232	-11.5285	1.32135	0.0364158	-0.0735332	absent
ANE1	AKV1	ANE	AKV	ANE1AKV1	Glucose	1	0.0728354	6.11e-09	-8.21366	-7.5468	1.32135	0.0520262	-0.033945	absent
ANE1	AKV1	ANE	AKV	ANE1AKV1	Glucose	2	0.0728354	1.32e-08	-7.87867	-7.75426	1.32135	0.0520262	-0.033945	absent
ANE1	AKV1	ANE	AKV	ANE1AKV1	UY	1	-10	3.06e-08	-7.51367	-10.7126	1.32135	-10	-10	absent
ANE1	AKV1	ANE	AKV	ANE1AKV1	UY	2	-10	1.4e-08	-7.85305	-7.84164	1.32135	-10	-10	absent
ANE1	BBI1	ANE	BBI	ANE1BBI1	Glycerol	2	-10	1.94e-08	-7.71275	-15.0517	1.32145	0.0364158	-0.0628554	absent
ANE1	BBI1	ANE	BBI	ANE1BBI1	Glycerol	1	-10	7.72e-09	-8.11232	-15.8508	1.32145	0.0364158	-0.0628554	absent
ANE1	BBI1	ANE	BBI	ANE1BBI1	Glucose	1	-10	6.11e-09	-8.21366	-10.442	1.32145	0.0520262	0.0118567	absent
ANE1	BBI1	ANE	BBI	ANE1BBI1	Glucose	2	-10	1.32e-08	-7.87867	-12.144	1.32145	0.0520262	0.0118567	absent
ANE1	BBI1	ANE	BBI	ANE1BBI1	UY	1	-10	3.06e-08	-7.51367	-14.6535	1.32145	-10	-10	absent
ANE1	BBI1	ANE	BBI	ANE1BBI1	UY	2	-10	1.4e-08	-7.85305	-11.8721	1.32145	-10	-10	absent
ANE1	BAK1	ANE	BAK	ANE1BAK1	Glycerol	2	0.179472	1.94e-08	-7.71275	-15.6007	1.18959	0.0364158	-0.00177197	absent
ANE1	BAK1	ANE	BAK	ANE1BAK1	Glycerol	1	0.179472	7.72e-09	-8.11232	-13.0026	1.18959	0.0364158	-0.00177197	absent
ANE1	BAK1	ANE	BAK	ANE1BAK1	Glucose	1	0.0750051	6.11e-09	-8.21366	-8.70654	1.18959	0.0520262	0.0639478	absent
ANE1	BAK1	ANE	BAK	ANE1BAK1	Glucose	2	0.0750051	1.32e-08	-7.87867	-9.02953	1.18959	0.0520262	0.0639478	absent
ANE1	BAK1	ANE	BAK	ANE1BAK1	UY	1	-10	3.06e-08	-7.51367	-11.6129	1.18959	-10	-10	absent
ANE1	BAK1	ANE	BAK	ANE1BAK1	UY	2	-10	1.4e-08	-7.85305	-8.38672	1.18959	-10	-10	absent
ANE1	BEH1	ANE	BEH	ANE1BEH1	Glycerol	2	-10	1.94e-08	-7.71275	-15.2837	0.897873	0.0364158	-1	absent
ANE1	BEH1	ANE	BEH	ANE1BEH1	Glycerol	1	-10	7.72e-09	-8.11232	-16.0829	0.897873	0.0364158	-1	absent
ANE1	BEH1	ANE	BEH	ANE1BEH1	Glucose	1	-10	6.11e-09	-8.21366	-12.4453	0.897873	0.0520262	-0.0314472	absent
ANE1	BEH1	ANE	BEH	ANE1BEH1	Glucose	2	-10	1.32e-08	-7.87867	-12.376	0.897873	0.0520262	-0.0314472	absent
ANE1	BEH1	ANE	BEH	ANE1BEH1	UY	1	-10	3.06e-08	-7.51367	-14.8856	0.897873	-10	-10	absent
ANE1	BEH1	ANE	BEH	ANE1BEH1	UY	2	-10	1.4e-08	-7.85305	-12.1041	0.897873	-10	-10	absent
ANE1	BLA1	ANE	BLA	ANE1BLA1	Glycerol	2	0.101579	1.94e-08	-7.71275	-12.2568	1.32636	0.0364158	-10	absent
ANE1	BLA1	ANE	BLA	ANE1BLA1	Glycerol	1	0.101579	7.72e-09	-8.11232	-16.2003	1.32636	0.0364158	-10	absent
ANE1	BLA1	ANE	BLA	ANE1BLA1	Glucose	1	0.0382896	6.11e-09	-8.21366	-8.34082	1.32636	0.0520262	-10	absent
ANE1	BLA1	ANE	BLA	ANE1BLA1	Glucose	2	0.0382896	1.32e-08	-7.87867	-12.4934	1.32636	0.0520262	-10	absent
ANE1	BLA1	ANE	BLA	ANE1BLA1	UY	1	-10	3.06e-08	-7.51367	-13.2972	1.32636	-10	-10	absent
ANE1	BLA1	ANE	BLA	ANE1BLA1	UY	2	-10	1.4e-08	-7.85305	-8.58911	1.32636	-10	-10	absent
ANE1	BHM1	ANE	BHM	ANE1BHM1	Glycerol	2	-10	1.94e-08	-7.71275	-15.6655	1.30218	0.0364158	-1	absent
ANE1	BHM1	ANE	BHM	ANE1BHM1	Glycerol	1	-10	7.72e-09	-8.11232	-16.4647	1.30218	0.0364158	-1	absent
ANE1	BHM1	ANE	BHM	ANE1BHM1	Glucose	1	-10	6.11e-09	-8.21366	-12.8271	1.30218	0.0520262	-10	absent
ANE1	BHM1	ANE	BHM	ANE1BHM1	Glucose	2	-10	1.32e-08	-7.87867	-12.7578	1.30218	0.0520262	-10	absent
ANE1	BHM1	ANE	BHM	ANE1BHM1	UY	1	-10	3.06e-08	-7.51367	-15.2674	1.30218	-10	-10	absent
ANE1	BHM1	ANE	BHM	ANE1BHM1	UY	2	-10	1.4e-08	-7.85305	-12.486	1.30218	-10	-10	absent
[truncated: 22,566 more rows]

## Sheet: Sup Table 2
columns description: Mata and Matalp parents (the columns containing 3 letters corresponds to the names from Peter et al, Nature, 2018); -10 tags in the fitness columns indicate strains that were *ABSENT* from the corresponding competition experiments, -1 tags represents strain that were *EXTINCT* during the competition. Genetic distance is taken from Peter et al., Nature, 2018 data. GD_group are…
A_parent	alp_parent	A_parent_3letters	alp_parent_3letters	offspring	media	offspring_fitness	fitness_A	fitness_alp	mean_parents	min_parents	max_parents	Genetic_Distance	GD_group
ALG1	AKB1	ALG	AKB	ALG1AKB1	Glu+Sorbitol	-10	-1	0.139707	-0.430147	-1	0.139707	1.3399	(1, 1.5]
ALG1	AKB1	ALG	AKB	ALG1AKB1	Glucose	-10	-0.124109	-0.0154866	-0.0697976	-0.124109	-0.0154866	1.3399	(1, 1.5]
ALG1	AKB1	ALG	AKB	ALG1AKB1	Glycerol	-10	-1	-1	-1	-1	-1	1.3399	(1, 1.5]
ALG1	AKP1	ALG	AKP	ALG1AKP1	Glu+Sorbitol	-10	-1	0.0982963	-0.450852	-1	0.0982963	0.775392	(0.5,1]
ALG1	AKP1	ALG	AKP	ALG1AKP1	Glucose	0.0113388	-0.124109	-0.0557565	-0.0899326	-0.124109	-0.0557565	0.775392	(0.5,1]
ALG1	AKP1	ALG	AKP	ALG1AKP1	Glycerol	-10	-1	-0.109008	-0.554504	-1	-0.109008	0.775392	(0.5,1]
ALG1	ALG1	ALG	ALG	ALG1ALG1	Glu+Sorbitol	-10	-1	0.0868454	-0.456577	-1	0.0868454	0	(0,0.05]
ALG1	ALG1	ALG	ALG	ALG1ALG1	Glucose	-10	-0.124109	-0.141619	-0.132864	-0.141619	-0.124109	0	(0,0.05]
ALG1	ALG1	ALG	ALG	ALG1ALG1	Glycerol	-10	-1	-0.0464457	-0.523223	-1	-0.0464457	0	(0,0.05]
ALG1	ANG1	ALG	ANG	ALG1ANG1	Glu+Sorbitol	-10	-1	0.0628167	-0.468592	-1	0.0628167	1.00485	(0.5,1]
ALG1	ANG1	ALG	ANG	ALG1ANG1	Glucose	-10	-0.124109	0.0663533	-0.0288777	-0.124109	0.0663533	1.00485	(0.5,1]
ALG1	ANG1	ALG	ANG	ALG1ANG1	Glycerol	-10	-1	-1	-1	-1	-1	1.00485	(0.5,1]
ALG1	AIM1	ALG	AIM	ALG1AIM1	Glu+Sorbitol	-10	-1	-1	-1	-1	-1	0.832878	(0.5,1]
ALG1	AIM1	ALG	AIM	ALG1AIM1	Glucose	-10	-0.124109	-10	-5.06205	-10	-0.124109	0.832878	(0.5,1]
ALG1	AIM1	ALG	AIM	ALG1AIM1	Glycerol	-10	-1	-10	-5.5	-10	-1	0.832878	(0.5,1]
ALG1	AKV1	ALG	AKV	ALG1AKV1	Glu+Sorbitol	-0.0390913	-1	0.0943177	-0.452841	-1	0.0943177	0.775317	(0.5,1]
ALG1	AKV1	ALG	AKV	ALG1AKV1	Glucose	-10	-0.124109	-0.033945	-0.0790268	-0.124109	-0.033945	0.775317	(0.5,1]
ALG1	AKV1	ALG	AKV	ALG1AKV1	Glycerol	-0.0020795	-1	-0.0735332	-0.536767	-1	-0.0735332	0.775317	(0.5,1]
ALG1	BBI1	ALG	BBI	ALG1BBI1	Glu+Sorbitol	-10	-1	0.242166	-0.378917	-1	0.242166	0.774873	(0.5,1]
ALG1	BBI1	ALG	BBI	ALG1BBI1	Glucose	-10	-0.124109	0.0118567	-0.056126	-0.124109	0.0118567	0.774873	(0.5,1]
ALG1	BBI1	ALG	BBI	ALG1BBI1	Glycerol	-10	-1	-0.0628554	-0.531428	-1	-0.0628554	0.774873	(0.5,1]
ALG1	BAK1	ALG	BAK	ALG1BAK1	Glu+Sorbitol	-10	-1	0.0545167	-0.472742	-1	0.0545167	1.35187	(1, 1.5]
ALG1	BAK1	ALG	BAK	ALG1BAK1	Glucose	-10	-0.124109	0.0639478	-0.0300804	-0.124109	0.0639478	1.35187	(1, 1.5]
ALG1	BAK1	ALG	BAK	ALG1BAK1	Glycerol	0.114964	-1	-0.00177197	-0.500886	-1	-0.00177197	1.35187	(1, 1.5]
ALG1	BEH1	ALG	BEH	ALG1BEH1	Glu+Sorbitol	-10	-1	0.114205	-0.442898	-1	0.114205	1.19742	(1, 1.5]
ALG1	BEH1	ALG	BEH	ALG1BEH1	Glucose	-10	-0.124109	-0.0314472	-0.077778	-0.124109	-0.0314472	1.19742	(1, 1.5]
ALG1	BEH1	ALG	BEH	ALG1BEH1	Glycerol	-10	-1	-1	-1	-1	-1	1.19742	(1, 1.5]
ALG1	BLA1	ALG	BLA	ALG1BLA1	Glu+Sorbitol	-10	-1	-10	-5.5	-10	-1	0.772969	(0.5,1]
ALG1	BLA1	ALG	BLA	ALG1BLA1	Glucose	-10	-0.124109	-10	-5.06205	-10	-0.124109	0.772969	(0.5,1]
ALG1	BLA1	ALG	BLA	ALG1BLA1	Glycerol	-10	-1	-10	-5.5	-10	-1	0.772969	(0.5,1]
ALG1	BHM1	ALG	BHM	ALG1BHM1	Glu+Sorbitol	-10	-1	-1	-1	-1	-1	0.806216	(0.5,1]
ALG1	BHM1	ALG	BHM	ALG1BHM1	Glucose	-10	-0.124109	-10	-5.06205	-10	-0.124109	0.806216	(0.5,1]
ALG1	BHM1	ALG	BHM	ALG1BHM1	Glycerol	-10	-1	-1	-1	-1	-1	0.806216	(0.5,1]
ALG1	BHN1	ALG	BHN	ALG1BHN1	Glu+Sorbitol	-10	-1	0.00750642	-0.496247	-1	0.00750642	0.788215	(0.5,1]
ALG1	BHN1	ALG	BHN	ALG1BHN1	Glucose	-10	-0.124109	-1	-0.562054	-1	-0.124109	0.788215	(0.5,1]
ALG1	BHN1	ALG	BHN	ALG1BHN1	Glycerol	-10	-1	-1	-1	-1	-1	0.788215	(0.5,1]
ALG1	BHB1	ALG	BHB	ALG1BHB1	Glu+Sorbitol	-10	-1	-1	-1	-1	-1	0.824148	(0.5,1]
ALG1	BHB1	ALG	BHB	ALG1BHB1	Glucose	-0.120298	-0.124109	-10	-5.06205	-10	-0.124109	0.824148	(0.5,1]
ALG1	BHB1	ALG	BHB	ALG1BHB1	Glycerol	-10	-1	-10	-5.5	-10	-1	0.824148	(0.5,1]
ALG1	BLE1	ALG	BLE	ALG1BLE1	Glu+Sorbitol	-10	-1	-1	-1	-1	-1	0.779835	(0.5,1]
ALG1	BLE1	ALG	BLE	ALG1BLE1	Glucose	-10	-0.124109	-0.0748489	-0.0994788	-0.124109	-0.0748489	0.779835	(0.5,1]
ALG1	BLE1	ALG	BLE	ALG1BLE1	Glycerol	-10	-1	-0.044381	-0.52219	-1	-0.044381	0.779835	(0.5,1]
ALG1	BHF1	ALG	BHF	ALG1BHF1	Glu+Sorbitol	-10	-1	0.0591106	-0.470445	-1	0.0591106	0.768827	(0.5,1]
ALG1	BHF1	ALG	BHF	ALG1BHF1	Glucose	-10	-0.124109	0.0612509	-0.0314289	-0.124109	0.0612509	0.768827	(0.5,1]
ALG1	BHF1	ALG	BHF	ALG1BHF1	Glycerol	-10	-1	0.0945635	-0.452718	-1	0.0945635	0.768827	(0.5,1]
ALG1	BKR1	ALG	BKR	ALG1BKR1	Glu+Sorbitol	-10	-1	-1	-1	-1	-1	0.779545	(0.5,1]
ALG1	BKR1	ALG	BKR	ALG1BKR1	Glucose	-10	-0.124109	-0.013402	-0.0687554	-0.124109	-0.013402	0.779545	(0.5,1]
ALG1	BKR1	ALG	BKR	ALG1BKR1	Glycerol	0.0461843	-1	-1	-1	-1	-1	0.779545	(0.5,1]
ALG1	BLL1	ALG	BLL	ALG1BLL1	Glu+Sorbitol	-10	-1	-1	-1	-1	-1	0.783561	(0.5,1]
ALG1	BLL1	ALG	BLL	ALG1BLL1	Glucose	-10	-0.124109	-1	-0.562054	-1	-0.124109	0.783561	(0.5,1]
ALG1	BLL1	ALG	BLL	ALG1BLL1	Glycerol	0.04615	-1	0.120353	-0.439823	-1	0.120353	0.783561	(0.5,1]
ALG1	BNI1	ALG	BNI	ALG1BNI1	Glu+Sorbitol	-10	-1	-10	-1	-1	-1	0.780347	(0.5,1]
ALG1	BNI1	ALG	BNI	ALG1BNI1	Glucose	-10	-0.124109	-10	-0.124109	-0.124109	-0.124109	0.780347	(0.5,1]
ALG1	BNI1	ALG	BNI	ALG1BNI1	Glycerol	-10	-1	-10	-1	-1	-1	0.780347	(0.5,1]
ALG1	BQG1	ALG	BQG	ALG1BQG1	Glu+Sorbitol	-10	-1	0.133013	-0.433494	-1	0.133013	0.779306	(0.5,1]
ALG1	BQG1	ALG	BQG	ALG1BQG1	Glucose	-10	-0.124109	-0.0571925	-0.0906506	-0.124109	-0.0571925	0.779306	(0.5,1]
ALG1	BQG1	ALG	BQG	ALG1BQG1	Glycerol	0.0471008	-1	0.0537228	-0.473139	-1	0.0537228	0.779306	(0.5,1]
ALG1	BNK1	ALG	BNK	ALG1BNK1	Glu+Sorbitol	-10	-1	-1	-1	-1	-1	0.780836	(0.5,1]
ALG1	BNK1	ALG	BNK	ALG1BNK1	Glucose	-10	-0.124109	-0.0796816	-0.101895	-0.124109	-0.0796816	0.780836	(0.5,1]
ALG1	BNK1	ALG	BNK	ALG1BNK1	Glycerol	-10	-1	0.115878	-0.442061	-1	0.115878	0.780836	(0.5,1]
ALG1	BPQ1	ALG	BPQ	ALG1BPQ1	Glu+Sorbitol	-0.0296003	-1	0.196057	-0.401972	-1	0.196057	0.780851	(0.5,1]
ALG1	BPQ1	ALG	BPQ	ALG1BPQ1	Glucose	0.0251354	-0.124109	0.00714221	-0.0584832	-0.124109	0.00714221	0.780851	(0.5,1]
ALG1	BPQ1	ALG	BPQ	ALG1BPQ1	Glycerol	-0.0215838	-1	0.0632255	-0.468387	-1	0.0632255	0.780851	(0.5,1]
ALG1	BQH1	ALG	BQH	ALG1BQH1	Glu+Sorbitol	-10	-1	0.00347705	-0.498261	-1	0.00347705	0.783739	(0.5,1]
ALG1	BQH1	ALG	BQH	ALG1BQH1	Glucose	-10	-0.124109	0.0201877	-0.0519605	-0.124109	0.0201877	0.783739	(0.5,1]
ALG1	BQH1	ALG	BQH	ALG1BQH1	Glycerol	-10	-1	-1	-1	-1	-1	0.783739	(0.5,1]
ALG1	BRA1	ALG	BRA	ALG1BRA1	Glu+Sorbitol	-10	-1	0.0670496	-0.466475	-1	0.0670496	0.78498	(0.5,1]
ALG1	BRA1	ALG	BRA	ALG1BRA1	Glucose	-10	-0.124109	-0.0988197	-0.111464	-0.124109	-0.0988197	0.78498	(0.5,1]
ALG1	BRA1	ALG	BRA	ALG1BRA1	Glycerol	-10	-1	-1	-1	-1	-1	0.78498	(0.5,1]
ALG1	BLN1	ALG	BLN	ALG1BLN1	Glu+Sorbitol	-10	-1	-10	-1	-1	-1	0.777824	(0.5,1]
ALG1	BLN1	ALG	BLN	ALG1BLN1	Glucose	-10	-0.124109	-10	-0.124109	-0.124109	-0.124109	0.777824	(0.5,1]
ALG1	BLN1	ALG	BLN	ALG1BLN1	Glycerol	-10	-1	-10	-1	-1	-1	0.777824	(0.5,1]
ALG1	BQI1	ALG	BQI	ALG1BQI1	Glu+Sorbitol	0.103153	-1	0.143956	-0.428022	-1	0.143956	0.780832	(0.5,1]
ALG1	BQI1	ALG	BQI	ALG1BQI1	Glucose	-10	-0.124109	-0.108288	-0.116198	-0.124109	-0.108288	0.780832	(0.5,1]
ALG1	BQI1	ALG	BQI	ALG1BQI1	Glycerol	0.0642309	-1	-0.01173	-0.505865	-1	-0.01173	0.780832	(0.5,1]
ALG1	BRB1	ALG	BRB	ALG1BRB1	Glu+Sorbitol	0.0175828	-1	0.109832	-0.445084	-1	0.109832	0.799221	(0.5,1]
ALG1	BRB1	ALG	BRB	ALG1BRB1	Glucose	-0.000769146	-0.124109	0.0350566	-0.0445261	-0.124109	0.0350566	0.799221	(0.5,1]
ALG1	BRB1	ALG	BRB	ALG1BRB1	Glycerol	-0.0664249	-1	0.000627839	-0.499686	-1	0.000627839	0.799221	(0.5,1]
ALG1	BLP1	ALG	BLP	ALG1BLP1	Glu+Sorbitol	-10	-1	0.159343	-0.420328	-1	0.159343	0.778209	(0.5,1]
ALG1	BLP1	ALG	BLP	ALG1BLP1	Glucose	-10	-0.124109	0.0477277	-0.0381905	-0.124109	0.0477277	0.778209	(0.5,1]
ALG1	BLP1	ALG	BLP	ALG1BLP1	Glycerol	-10	-1	0.0191829	-0.490409	-1	0.0191829	0.778209	(0.5,1]
ALG1	BRC1	ALG	BRC	ALG1BRC1	Glu+Sorbitol	-0.236994	-1	0.107766	-0.446117	-1	0.107766	0.773418	(0.5,1]
ALG1	BRC1	ALG	BRC	ALG1BRC1	Glucose	-0.0319732	-0.124109	-0.0843597	-0.104234	-0.124109	-0.0843597	0.773418	(0.5,1]
ALG1	BRC1	ALG	BRC	ALG1BRC1	Glycerol	-10	-1	-0.0845599	-0.54228	-1	-0.0845599	0.773418	(0.5,1]
ALG1	BPT1	ALG	BPT	ALG1BPT1	Glu+Sorbitol	-10	-1	0.0437225	-0.478139	-1	0.0437225	0.77716	(0.5,1]
ALG1	BPT1	ALG	BPT	ALG1BPT1	Glucose	-10	-0.124109	-0.0226414	-0.073375	-0.124109	-0.0226414	0.77716	(0.5,1]
ALG1	BPT1	ALG	BPT	ALG1BPT1	Glycerol	-10	-1	0.0527905	-0.473605	-1	0.0527905	0.77716	(0.5,1]
ALG1	BRD1	ALG	BRD	ALG1BRD1	Glu+Sorbitol	-10	-1	0.0462453	-0.476877	-1	0.0462453	0.774287	(0.5,1]
ALG1	BRD1	ALG	BRD	ALG1BRD1	Glucose	-0.0270373	-0.124109	-0.0248454	-0.0744771	-0.124109	-0.0248454	0.774287	(0.5,1]
ALG1	BRD1	ALG	BRD	ALG1BRD1	Glycerol	0.00110038	-1	0.10436	-0.44782	-1	0.10436	0.774287	(0.5,1]
ALG1	BMK1	ALG	BMK	ALG1BMK1	Glu+Sorbitol	-10	-1	0.10245	-0.448775	-1	0.10245	0.778872	(0.5,1]
ALG1	BMK1	ALG	BMK	ALG1BMK1	Glucose	-10	-0.124109	0.0206207	-0.051744	-0.124109	0.0206207	0.778872	(0.5,1]
ALG1	BMK1	ALG	BMK	ALG1BMK1	Glycerol	-10	-1	0.0727937	-0.463603	-1	0.0727937	0.778872	(0.5,1]
ALG1	BQP1	ALG	BQP	ALG1BQP1	Glu+Sorbitol	-10	-1	0.108223	-0.445888	-1	0.108223	0.782626	(0.5,1]
ALG1	BQP1	ALG	BQP	ALG1BQP1	Glucose	-0.0700704	-0.124109	0.0119541	-0.0560773	-0.124109	0.0119541	0.782626	(0.5,1]
ALG1	BQP1	ALG	BQP	ALG1BQP1	Glycerol	-10	-1	-0.0301991	-0.5151	-1	-0.0301991	0.782626	(0.5,1]
ALG1	BLV1	ALG	BLV	ALG1BLV1	Glu+Sorbitol	-10	-1	0.148788	-0.425606	-1	0.148788	0.779241	(0.5,1]
ALG1	BLV1	ALG	BLV	ALG1BLV1	Glucose	-10	-0.124109	-0.0681483	-0.0961285	-0.124109	-0.0681483	0.779241	(0.5,1]
ALG1	BLV1	ALG	BLV	ALG1BLV1	Glycerol	-10	-1	0.0838921	-0.458054	-1	0.0838921	0.779241	(0.5,1]
ALG1	BQQ1	ALG	BQQ	ALG1BQQ1	Glu+Sorbitol	-10	-1	0.0432009	-0.4784	-1	0.0432009	0.775988	(0.5,1]
ALG1	BQQ1	ALG	BQQ	ALG1BQQ1	Glucose	-10	-0.124109	0.0291802	-0.0474643	-0.124109	0.0291802	0.775988	(0.5,1]
ALG1	BQQ1	ALG	BQQ	ALG1BQQ1	Glycerol	-10	-1	0.0824425	-0.458779	-1	0.0824425	0.775988	(0.5,1]
ALG1	BMA1	ALG	BMA	ALG1BMA1	Glu+Sorbitol	-10	-1	0.0267219	-0.486639	-1	0.0267219	1.3926	(1, 1.5]
ALG1	BMA1	ALG	BMA	ALG1BMA1	Glucose	-10	-0.124109	0.0277247	-0.048192	-0.124109	0.0277247	1.3926	(1, 1.5]
ALG1	BMA1	ALG	BMA	ALG1BMA1	Glycerol	-10	-1	0.0885346	-0.455733	-1	0.0885346	1.3926	(1, 1.5]
ALG1	BQR1	ALG	BQR	ALG1BQR1	Glu+Sorbitol	-10	-1	0.0524282	-0.473786	-1	0.0524282	0.77567	(0.5,1]
ALG1	BQR1	ALG	BQR	ALG1BQR1	Glucose	-10	-0.124109	-0.0545715	-0.0893401	-0.124109	-0.0545715	0.77567	(0.5,1]
ALG1	BQR1	ALG	BQR	ALG1BQR1	Glycerol	0.0276484	-1	0.0588489	-0.470576	-1	0.0588489	0.77567	(0.5,1]
ALG1	CAD1	ALG	CAD	ALG1CAD1	Glu+Sorbitol	-10	-1	0.0934632	-0.453268	-1	0.0934632	0.867471	(0.5,1]
ALG1	CAD1	ALG	CAD	ALG1CAD1	Glucose	-10	-0.124109	-0.0194773	-0.071793	-0.124109	-0.0194773	0.867471	(0.5,1]
ALG1	CAD1	ALG	CAD	ALG1CAD1	Glycerol	-10	-1	-10	-5.5	-10	-1	0.867471	(0.5,1]
ALG1	BSB1	ALG	BSB	ALG1BSB1	Glu+Sorbitol	-10	-1	-10	-5.5	-10	-1	0.770753	(0.5,1]
ALG1	BSB1	ALG	BSB	ALG1BSB1	Glucose	-10	-0.124109	-10	-0.124109	-0.124109	-0.124109	0.770753	(0.5,1]
ALG1	BSB1	ALG	BSB	ALG1BSB1	Glycerol	-10	-1	-10	-1	-1	-1	0.770753	(0.5,1]
ALG1	BTH1	ALG	BTH	ALG1BTH1	Glu+Sorbitol	-10	-1	0.0555657	-0.472217	-1	0.0555657	0.770225	(0.5,1]
ALG1	BTH1	ALG	BTH	ALG1BTH1	Glucose	-10	-0.124109	-0.01391	-0.0690094	-0.124109	-0.01391	0.770225	(0.5,1]
ALG1	BTH1	ALG	BTH	ALG1BTH1	Glycerol	-10	-1	-1	-1	-1	-1	0.770225	(0.5,1]
ALG1	AHP1	ALG	AHP	ALG1AHP1	Glu+Sorbitol	-10	-1	-1	-1	-1	-1	0.874692	(0.5,1]
ALG1	AHP1	ALG	AHP	ALG1AHP1	Glucose	-10	-0.124109	-1	-0.562054	-1	-0.124109	0.874692	(0.5,1]
ALG1	AHP1	ALG	AHP	ALG1AHP1	Glycerol	-10	-1	0.0888156	-0.455592	-1	0.0888156	0.874692	(0.5,1]
ALG1	CQD1	ALG	CQD	ALG1CQD1	Glu+Sorbitol	-10	-1	0.0454048	-0.477298	-1	0.0454048	0.941244	(0.5,1]
ALG1	CQD1	ALG	CQD	ALG1CQD1	Glucose	-10	-0.124109	0.0106465	-0.0567311	-0.124109	0.0106465	0.941244	(0.5,1]
ALG1	CQD1	ALG	CQD	ALG1CQD1	Glycerol	-10	-1	-10	-5.5	-10	-1	0.941244	(0.5,1]
ALG1	APV1	ALG	APV	ALG1APV1	Glu+Sorbitol	-10	-1	0.0394829	-0.480259	-1	0.0394829	0.775983	(0.5,1]
ALG1	APV1	ALG	APV	ALG1APV1	Glucose	-10	-0.124109	-0.0613302	-0.0927194	-0.124109	-0.0613302	0.775983	(0.5,1]
ALG1	APV1	ALG	APV	ALG1APV1	Glycerol	0.0202867	-1	0.176787	-0.411606	-1	0.176787	0.775983	(0.5,1]
ALG1	AST1	ALG	AST	ALG1AST1	Glu+Sorbitol	-10	-1	-1	-1	-1	-1	0.776706	(0.5,1]
ALG1	AST1	ALG	AST	ALG1AST1	Glucose	-1	-0.124109	0.0143308	-0.054889	-0.124109	0.0143308	0.776706	(0.5,1]
ALG1	AST1	ALG	AST	ALG1AST1	Glycerol	-10	-1	-1	-1	-1	-1	0.776706	(0.5,1]
ALG1	CCV1	ALG	CCV	ALG1CCV1	Glu+Sorbitol	-10	-1	0.107101	-0.44645	-1	0.107101	1.21786	(1, 1.5]
ALG1	CCV1	ALG	CCV	ALG1CCV1	Glucose	-10	-0.124109	0.044604	-0.0397524	-0.124109	0.044604	1.21786	(1, 1.5]
ALG1	CCV1	ALG	CCV	ALG1CCV1	Glycerol	-10	-1	-1	-1	-1	-1	1.21786	(1, 1.5]
ALG1	YAR1	ALG	YAR	ALG1YAR1	Glu+Sorbitol	-10	-1	-1	-1	-1	-1	0.941383	(0.5,1]
ALG1	YAR1	ALG	YAR	ALG1YAR1	Glucose	-10	-0.124109	-0.0705407	-0.0973247	-0.124109	-0.0705407	0.941383	(0.5,1]
ALG1	YAR1	ALG	YAR	ALG1YAR1	Glycerol	-10	-1	-1	-1	-1	-1	0.941383	(0.5,1]
ALG1	YBU1	ALG	YBU	ALG1YBU1	Glu+Sorbitol	-10	-1	-1	-1	-1	-1	1.14622	(1, 1.5]
ALG1	YBU1	ALG	YBU	ALG1YBU1	Glucose	-10	-0.124109	-10	-5.06205	-10	-0.124109	1.14622	(1, 1.5]
ALG1	YBU1	ALG	YBU	ALG1YBU1	Glycerol	-10	-1	-1	-1	-1	-1	1.14622	(1, 1.5]
AIK1	AKB1	AIK	AKB	AIK1AKB1	Glu+Sorbitol	-10	0.131157	0.139707	0.135432	0.131157	0.139707	1.53817	(1, 1.5]
AIK1	AKB1	AIK	AKB	AIK1AKB1	Glucose	-10	0.00753623	-0.0154866	-0.00397518	-0.0154866	0.00753623	1.53817	(1, 1.5]
AIK1	AKB1	AIK	AKB	AIK1AKB1	Glycerol	-10	0.0365608	-1	-0.48172	-1	0.0365608	1.53817	(1, 1.5]
AIK1	AKP1	AIK	AKP	AIK1AKP1	Glu+Sorbitol	-1	0.131157	0.0982963	0.114727	0.0982963	0.131157	0.181096	(0.05,0.5]
AIK1	AKP1	AIK	AKP	AIK1AKP1	Glucose	-0.0565989	0.00753623	-0.0557565	-0.0241101	-0.0557565	0.00753623	0.181096	(0.05,0.5]
AIK1	AKP1	AIK	AKP	AIK1AKP1	Glycerol	-10	0.0365608	-0.109008	-0.0362238	-0.109008	0.0365608	0.181096	(0.05,0.5]
AIK1	ALG1	AIK	ALG	AIK1ALG1	Glu+Sorbitol	-10	0.131157	0.0868454	0.109001	0.0868454	0.131157	0.777725	(0.5,1]
AIK1	ALG1	AIK	ALG	AIK1ALG1	Glucose	-10	0.00753623	-0.141619	-0.0670412	-0.141619	0.00753623	0.777725	(0.5,1]
AIK1	ALG1	AIK	ALG	AIK1ALG1	Glycerol	-10	0.0365608	-0.0464457	-0.00494243	-0.0464457	0.0365608	0.777725	(0.5,1]
AIK1	ANG1	AIK	ANG	AIK1ANG1	Glu+Sorbitol	-10	0.131157	0.0628167	0.0969867	0.0628167	0.131157	1.32678	(1, 1.5]
AIK1	ANG1	AIK	ANG	AIK1ANG1	Glucose	-10	0.00753623	0.0663533	0.0369448	0.00753623	0.0663533	1.32678	(1, 1.5]
AIK1	ANG1	AIK	ANG	AIK1ANG1	Glycerol	-10	0.0365608	-1	-0.48172	-1	0.0365608	1.32678	(1, 1.5]
AIK1	AIM1	AIK	AIM	AIK1AIM1	Glu+Sorbitol	-10	0.131157	-1	-0.434422	-1	0.131157	0.263505	(0.05,0.5]
AIK1	AIM1	AIK	AIM	AIK1AIM1	Glucose	-10	0.00753623	-10	-4.99623	-10	0.00753623	0.263505	(0.05,0.5]
AIK1	AIM1	AIK	AIM	AIK1AIM1	Glycerol	-10	0.0365608	-10	-4.98172	-10	0.0365608	0.263505	(0.05,0.5]
AIK1	AKV1	AIK	AKV	AIK1AKV1	Glu+Sorbitol	-0.100636	0.131157	0.0943177	0.112737	0.0943177	0.131157	0.181149	(0.05,0.5]
AIK1	AKV1	AIK	AKV	AIK1AKV1	Glucose	-0.080599	0.00753623	-0.033945	-0.0132044	-0.033945	0.00753623	0.181149	(0.05,0.5]
AIK1	AKV1	AIK	AKV	AIK1AKV1	Glycerol	-10	0.0365608	-0.0735332	-0.0184862	-0.0735332	0.0365608	0.181149	(0.05,0.5]
AIK1	BBI1	AIK	BBI	AIK1BBI1	Glu+Sorbitol	-10	0.131157	0.242166	0.186661	0.131157	0.242166	0.188946	(0.05,0.5]
AIK1	BBI1	AIK	BBI	AIK1BBI1	Glucose	-10	0.00753623	0.0118567	0.00969647	0.00753623	0.0118567	0.188946	(0.05,0.5]
AIK1	BBI1	AIK	BBI	AIK1BBI1	Glycerol	-10	0.0365608	-0.0628554	-0.0131473	-0.0628554	0.0365608	0.188946	(0.05,0.5]
AIK1	BAK1	AIK	BAK	AIK1BAK1	Glu+Sorbitol	-0.0116676	0.131157	0.0545167	0.0928367	0.0545167	0.131157	1.47001	(1, 1.5]
AIK1	BAK1	AIK	BAK	AIK1BAK1	Glucose	-10	0.00753623	0.0639478	0.035742	0.00753623	0.0639478	1.47001	(1, 1.5]
AIK1	BAK1	AIK	BAK	AIK1BAK1	Glycerol	0.0293356	0.0365608	-0.00177197	0.0173944	-0.00177197	0.0365608	1.47001	(1, 1.5]
AIK1	BEH1	AIK	BEH	AIK1BEH1	Glu+Sorbitol	-10	0.131157	0.114205	0.122681	0.114205	0.131157	1.46474	(1, 1.5]
AIK1	BEH1	AIK	BEH	AIK1BEH1	Glucose	-10	0.00753623	-0.0314472	-0.0119555	-0.0314472	0.00753623	1.46474	(1, 1.5]
AIK1	BEH1	AIK	BEH	AIK1BEH1	Glycerol	-10	0.0365608	-1	-0.48172	-1	0.0365608	1.46474	(1, 1.5]
AIK1	BLA1	AIK	BLA	AIK1BLA1	Glu+Sorbitol	-10	0.131157	-10	-4.93442	-10	0.131157	0.172215	(0.05,0.5]
AIK1	BLA1	AIK	BLA	AIK1BLA1	Glucose	-10	0.00753623	-10	-4.99623	-10	0.00753623	0.172215	(0.05,0.5]
AIK1	BLA1	AIK	BLA	AIK1BLA1	Glycerol	-10	0.0365608	-10	-4.98172	-10	0.0365608	0.172215	(0.05,0.5]
AIK1	BHM1	AIK	BHM	AIK1BHM1	Glu+Sorbitol	-10	0.131157	-1	-0.434422	-1	0.131157	0.264508	(0.05,0.5]
AIK1	BHM1	AIK	BHM	AIK1BHM1	Glucose	-10	0.00753623	-10	-4.99623	-10	0.00753623	0.264508	(0.05,0.5]
AIK1	BHM1	AIK	BHM	AIK1BHM1	Glycerol	-10	0.0365608	-1	-0.48172	-1	0.0365608	0.264508	(0.05,0.5]
AIK1	BHN1	AIK	BHN	AIK1BHN1	Glu+Sorbitol	-10	0.131157	0.00750642	0.0693315	0.00750642	0.131157	0.183202	(0.05,0.5]
AIK1	BHN1	AIK	BHN	AIK1BHN1	Glucose	-0.0609088	0.00753623	-1	-0.496232	-1	0.00753623	0.183202	(0.05,0.5]
AIK1	BHN1	AIK	BHN	AIK1BHN1	Glycerol	-10	0.0365608	-1	-0.48172	-1	0.0365608	0.183202	(0.05,0.5]
AIK1	BHB1	AIK	BHB	AIK1BHB1	Glu+Sorbitol	-10	0.131157	-1	-0.434422	-1	0.131157	0.232525	(0.05,0.5]
AIK1	BHB1	AIK	BHB	AIK1BHB1	Glucose	-10	0.00753623	-10	-4.99623	-10	0.00753623	0.232525	(0.05,0.5]
AIK1	BHB1	AIK	BHB	AIK1BHB1	Glycerol	-10	0.0365608	-10	-4.98172	-10	0.0365608	0.232525	(0.05,0.5]
AIK1	BLE1	AIK	BLE	AIK1BLE1	Glu+Sorbitol	-10	0.131157	-1	-0.434422	-1	0.131157	0.174117	(0.05,0.5]
AIK1	BLE1	AIK	BLE	AIK1BLE1	Glucose	-10	0.00753623	-0.0748489	-0.0336563	-0.0748489	0.00753623	0.174117	(0.05,0.5]
AIK1	BLE1	AIK	BLE	AIK1BLE1	Glycerol	-10	0.0365608	-0.044381	-0.00391009	-0.044381	0.0365608	0.174117	(0.05,0.5]
AIK1	BHF1	AIK	BHF	AIK1BHF1	Glu+Sorbitol	-10	0.131157	0.0591106	0.0951336	0.0591106	0.131157	0.171654	(0.05,0.5]
AIK1	BHF1	AIK	BHF	AIK1BHF1	Glucose	-10	0.00753623	0.0612509	0.0343936	0.00753623	0.0612509	0.171654	(0.05,0.5]
AIK1	BHF1	AIK	BHF	AIK1BHF1	Glycerol	-10	0.0365608	0.0945635	0.0655621	0.0365608	0.0945635	0.171654	(0.05,0.5]
AIK1	BKR1	AIK	BKR	AIK1BKR1	Glu+Sorbitol	-10	0.131157	-1	-0.434422	-1	0.131157	0.17924	(0.05,0.5]
AIK1	BKR1	AIK	BKR	AIK1BKR1	Glucose	-10	0.00753623	-0.013402	-0.0029329	-0.013402	0.00753623	0.17924	(0.05,0.5]
AIK1	BKR1	AIK	BKR	AIK1BKR1	Glycerol	-10	0.0365608	-1	-0.48172	-1	0.0365608	0.17924	(0.05,0.5]
AIK1	BLL1	AIK	BLL	AIK1BLL1	Glu+Sorbitol	-10	0.131157	-1	-0.434422	-1	0.131157	0.176716	(0.05,0.5]
AIK1	BLL1	AIK	BLL	AIK1BLL1	Glucose	-10	0.00753623	-1	-0.496232	-1	0.00753623	0.176716	(0.05,0.5]
AIK1	BLL1	AIK	BLL	AIK1BLL1	Glycerol	-0.0597118	0.0365608	0.120353	0.0784571	0.0365608	0.120353	0.176716	(0.05,0.5]
AIK1	BNI1	AIK	BNI	AIK1BNI1	Glu+Sorbitol	-10	0.131157	-10	0.131157	0.131157	0.131157	0.183947	(0.05,0.5]
AIK1	BNI1	AIK	BNI	AIK1BNI1	Glucose	-10	0.00753623	-10	0.00753623	0.00753623	0.00753623	0.183947	(0.05,0.5]
AIK1	BNI1	AIK	BNI	AIK1BNI1	Glycerol	-10	0.0365608	-10	0.0365608	0.0365608	0.0365608	0.183947	(0.05,0.5]
AIK1	BQG1	AIK	BQG	AIK1BQG1	Glu+Sorbitol	-10	0.131157	0.133013	0.132085	0.131157	0.133013	0.179092	(0.05,0.5]
AIK1	BQG1	AIK	BQG	AIK1BQG1	Glucose	-10	0.00753623	-0.0571925	-0.0248281	-0.0571925	0.00753623	0.179092	(0.05,0.5]
AIK1	BQG1	AIK	BQG	AIK1BQG1	Glycerol	-10	0.0365608	0.0537228	0.0451418	0.0365608	0.0537228	0.179092	(0.05,0.5]
AIK1	BNK1	AIK	BNK	AIK1BNK1	Glu+Sorbitol	-0.013415	0.131157	-1	-0.434422	-1	0.131157	0.163004	(0.05,0.5]
AIK1	BNK1	AIK	BNK	AIK1BNK1	Glucose	-10	0.00753623	-0.0796816	-0.0360727	-0.0796816	0.00753623	0.163004	(0.05,0.5]
AIK1	BNK1	AIK	BNK	AIK1BNK1	Glycerol	-10	0.0365608	0.115878	0.0762195	0.0365608	0.115878	0.163004	(0.05,0.5]
AIK1	BPQ1	AIK	BPQ	AIK1BPQ1	Glu+Sorbitol	-0.129525	0.131157	0.196057	0.163607	0.131157	0.196057	0.20425	(0.05,0.5]
AIK1	BPQ1	AIK	BPQ	AIK1BPQ1	Glucose	0.000920234	0.00753623	0.00714221	0.00733922	0.00714221	0.00753623	0.20425	(0.05,0.5]
AIK1	BPQ1	AIK	BPQ	AIK1BPQ1	Glycerol	-10	0.0365608	0.0632255	0.0498932	0.0365608	0.0632255	0.20425	(0.05,0.5]
AIK1	BQH1	AIK	BQH	AIK1BQH1	Glu+Sorbitol	-0.210064	0.131157	0.00347705	0.0673169	0.00347705	0.131157	0.164596	(0.05,0.5]
AIK1	BQH1	AIK	BQH	AIK1BQH1	Glucose	-10	0.00753623	0.0201877	0.013862	0.00753623	0.0201877	0.164596	(0.05,0.5]
AIK1	BQH1	AIK	BQH	AIK1BQH1	Glycerol	-10	0.0365608	-1	-0.48172	-1	0.0365608	0.164596	(0.05,0.5]
AIK1	BRA1	AIK	BRA	AIK1BRA1	Glu+Sorbitol	-10	0.131157	0.0670496	0.0991032	0.0670496	0.131157	0.188553	(0.05,0.5]
AIK1	BRA1	AIK	BRA	AIK1BRA1	Glucose	-10	0.00753623	-0.0988197	-0.0456417	-0.0988197	0.00753623	0.188553	(0.05,0.5]
AIK1	BRA1	AIK	BRA	AIK1BRA1	Glycerol	-10	0.0365608	-1	-0.48172	-1	0.0365608	0.188553	(0.05,0.5]
AIK1	BLN1	AIK	BLN	AIK1BLN1	Glu+Sorbitol	-10	0.131157	-10	0.131157	0.131157	0.131157	0.171392	(0.05,0.5]
AIK1	BLN1	AIK	BLN	AIK1BLN1	Glucose	-10	0.00753623	-10	0.00753623	0.00753623	0.00753623	0.171392	(0.05,0.5]
AIK1	BLN1	AIK	BLN	AIK1BLN1	Glycerol	-10	0.0365608	-10	0.0365608	0.0365608	0.0365608	0.171392	(0.05,0.5]
AIK1	BQI1	AIK	BQI	AIK1BQI1	Glu+Sorbitol	-1	0.131157	0.143956	0.137556	0.131157	0.143956	0.172274	(0.05,0.5]
AIK1	BQI1	AIK	BQI	AIK1BQI1	Glucose	-10	0.00753623	-0.108288	-0.0503759	-0.108288	0.00753623	0.172274	(0.05,0.5]
AIK1	BQI1	AIK	BQI	AIK1BQI1	Glycerol	-10	0.0365608	-0.01173	0.0124154	-0.01173	0.0365608	0.172274	(0.05,0.5]
AIK1	BRB1	AIK	BRB	AIK1BRB1	Glu+Sorbitol	-0.132317	0.131157	0.109832	0.120495	0.109832	0.131157	0.264748	(0.05,0.5]
AIK1	BRB1	AIK	BRB	AIK1BRB1	Glucose	0.00571154	0.00753623	0.0350566	0.0212964	0.00753623	0.0350566	0.264748	(0.05,0.5]
AIK1	BRB1	AIK	BRB	AIK1BRB1	Glycerol	-1	0.0365608	0.000627839	0.0185943	0.000627839	0.0365608	0.264748	(0.05,0.5]
AIK1	BLP1	AIK	BLP	AIK1BLP1	Glu+Sorbitol	-10	0.131157	0.159343	0.14525	0.131157	0.159343	0.171711	(0.05,0.5]
AIK1	BLP1	AIK	BLP	AIK1BLP1	Glucose	-10	0.00753623	0.0477277	0.0276319	0.00753623	0.0477277	0.171711	(0.05,0.5]
AIK1	BLP1	AIK	BLP	AIK1BLP1	Glycerol	-10	0.0365608	0.0191829	0.0278718	0.0191829	0.0365608	0.171711	(0.05,0.5]
AIK1	BRC1	AIK	BRC	AIK1BRC1	Glu+Sorbitol	-1	0.131157	0.107766	0.119461	0.107766	0.131157	0.1859	(0.05,0.5]
AIK1	BRC1	AIK	BRC	AIK1BRC1	Glucose	0.0450167	0.00753623	-0.0843597	-0.0384117	-0.0843597	0.00753623	0.1859	(0.05,0.5]
AIK1	BRC1	AIK	BRC	AIK1BRC1	Glycerol	-10	0.0365608	-0.0845599	-0.0239996	-0.0845599	0.0365608	0.1859	(0.05,0.5]
AIK1	BPT1	AIK	BPT	AIK1BPT1	Glu+Sorbitol	-10	0.131157	0.0437225	0.0874396	0.0437225	0.131157	0.17626	(0.05,0.5]
AIK1	BPT1	AIK	BPT	AIK1BPT1	Glucose	-10	0.00753623	-0.0226414	-0.00755258	-0.0226414	0.00753623	0.17626	(0.05,0.5]
AIK1	BPT1	AIK	BPT	AIK1BPT1	Glycerol	-10	0.0365608	0.0527905	0.0446757	0.0365608	0.0527905	0.17626	(0.05,0.5]
AIK1	BRD1	AIK	BRD	AIK1BRD1	Glu+Sorbitol	-10	0.131157	0.0462453	0.088701	0.0462453	0.131157	0.165237	(0.05,0.5]
AIK1	BRD1	AIK	BRD	AIK1BRD1	Glucose	-0.0243247	0.00753623	-0.0248454	-0.00865461	-0.0248454	0.00753623	0.165237	(0.05,0.5]
AIK1	BRD1	AIK	BRD	AIK1BRD1	Glycerol	-10	0.0365608	0.10436	0.0704606	0.0365608	0.10436	0.165237	(0.05,0.5]
AIK1	BMK1	AIK	BMK	AIK1BMK1	Glu+Sorbitol	-10	0.131157	0.10245	0.116803	0.10245	0.131157	0.164882	(0.05,0.5]
AIK1	BMK1	AIK	BMK	AIK1BMK1	Glucose	-10	0.00753623	0.0206207	0.0140785	0.00753623	0.0206207	0.164882	(0.05,0.5]
AIK1	BMK1	AIK	BMK	AIK1BMK1	Glycerol	-10	0.0365608	0.0727937	0.0546773	0.0365608	0.0727937	0.164882	(0.05,0.5]
AIK1	BQP1	AIK	BQP	AIK1BQP1	Glu+Sorbitol	-10	0.131157	0.108223	0.11969	0.108223	0.131157	0.22065	(0.05,0.5]
AIK1	BQP1	AIK	BQP	AIK1BQP1	Glucose	-1	0.00753623	0.0119541	0.00974514	0.00753623	0.0119541	0.22065	(0.05,0.5]
AIK1	BQP1	AIK	BQP	AIK1BQP1	Glycerol	-10	0.0365608	-0.0301991	0.00318085	-0.0301991	0.0365608	0.22065	(0.05,0.5]
AIK1	BLV1	AIK	BLV	AIK1BLV1	Glu+Sorbitol	-10	0.131157	0.148788	0.139972	0.131157	0.148788	0.178995	(0.05,0.5]
AIK1	BLV1	AIK	BLV	AIK1BLV1	Glucose	-10	0.00753623	-0.0681483	-0.030306	-0.0681483	0.00753623	0.178995	(0.05,0.5]
AIK1	BLV1	AIK	BLV	AIK1BLV1	Glycerol	-10	0.0365608	0.0838921	0.0602265	0.0365608	0.0838921	0.178995	(0.05,0.5]
AIK1	BQQ1	AIK	BQQ	AIK1BQQ1	Glu+Sorbitol	-10	0.131157	0.0432009	0.0871788	0.0432009	0.131157	0.179141	(0.05,0.5]
AIK1	BQQ1	AIK	BQQ	AIK1BQQ1	Glucose	-10	0.00753623	0.0291802	0.0183582	0.00753623	0.0291802	0.179141	(0.05,0.5]
AIK1	BQQ1	AIK	BQQ	AIK1BQQ1	Glycerol	-10	0.0365608	0.0824425	0.0595017	0.0365608	0.0824425	0.179141	(0.05,0.5]
AIK1	BMA1	AIK	BMA	AIK1BMA1	Glu+Sorbitol	-1	0.131157	0.0267219	0.0789393	0.0267219	0.131157	1.56527	(1, 1.5]
AIK1	BMA1	AIK	BMA	AIK1BMA1	Glucose	-10	0.00753623	0.0277247	0.0176305	0.00753623	0.0277247	1.56527	(1, 1.5]
AIK1	BMA1	AIK	BMA	AIK1BMA1	Glycerol	0.0135041	0.0365608	0.0885346	0.0625477	0.0365608	0.0885346	1.56527	(1, 1.5]
AIK1	BQR1	AIK	BQR	AIK1BQR1	Glu+Sorbitol	-10	0.131157	0.0524282	0.0917924	0.0524282	0.131157	0.171928	(0.05,0.5]
AIK1	BQR1	AIK	BQR	AIK1BQR1	Glucose	-10	0.00753623	-0.0545715	-0.0235177	-0.0545715	0.00753623	0.171928	(0.05,0.5]
AIK1	BQR1	AIK	BQR	AIK1BQR1	Glycerol	-10	0.0365608	0.0588489	0.0477048	0.0365608	0.0588489	0.171928	(0.05,0.5]
AIK1	CAD1	AIK	CAD	AIK1CAD1	Glu+Sorbitol	-10	0.131157	0.0934632	0.11231	0.0934632	0.131157	0.323557	(0.05,0.5]
AIK1	CAD1	AIK	CAD	AIK1CAD1	Glucose	-10	0.00753623	-0.0194773	-0.00597054	-0.0194773	0.00753623	0.323557	(0.05,0.5]
AIK1	CAD1	AIK	CAD	AIK1CAD1	Glycerol	-10	0.0365608	-10	-4.98172	-10	0.0365608	0.323557	(0.05,0.5]
AIK1	BSB1	AIK	BSB	AIK1BSB1	Glu+Sorbitol	-10	0.131157	-10	-4.93442	-10	0.131157	0.16201	(0.05,0.5]
AIK1	BSB1	AIK	BSB	AIK1BSB1	Glucose	-10	0.00753623	-10	0.00753623	0.00753623	0.00753623	0.16201	(0.05,0.5]
AIK1	BSB1	AIK	BSB	AIK1BSB1	Glycerol	-10	0.0365608	-10	0.0365608	0.0365608	0.0365608	0.16201	(0.05,0.5]
AIK1	BTH1	AIK	BTH	AIK1BTH1	Glu+Sorbitol	-10	0.131157	0.0555657	0.0933612	0.0555657	0.131157	0.168961	(0.05,0.5]
AIK1	BTH1	AIK	BTH	AIK1BTH1	Glucose	-10	0.00753623	-0.01391	-0.0031869	-0.01391	0.00753623	0.168961	(0.05,0.5]
AIK1	BTH1	AIK	BTH	AIK1BTH1	Glycerol	-10	0.0365608	-1	-0.48172	-1	0.0365608	0.168961	(0.05,0.5]
AIK1	AHP1	AIK	AHP	AIK1AHP1	Glu+Sorbitol	-10	0.131157	-1	-0.434422	-1	0.131157	0.332333	(0.05,0.5]
AIK1	AHP1	AIK	AHP	AIK1AHP1	Glucose	-10	0.00753623	-1	-0.496232	-1	0.00753623	0.332333	(0.05,0.5]
AIK1	AHP1	AIK	AHP	AIK1AHP1	Glycerol	-10	0.0365608	0.0888156	0.0626882	0.0365608	0.0888156	0.332333	(0.05,0.5]
AIK1	CQD1	AIK	CQD	AIK1CQD1	Glu+Sorbitol	-10	0.131157	0.0454048	0.0882808	0.0454048	0.131157	0.767248	(0.5,1]
AIK1	CQD1	AIK	CQD	AIK1CQD1	Glucose	-10	0.00753623	0.0106465	0.00909139	0.00753623	0.0106465	0.767248	(0.5,1]
AIK1	CQD1	AIK	CQD	AIK1CQD1	Glycerol	-10	0.0365608	-10	-4.98172	-10	0.0365608	0.767248	(0.5,1]
AIK1	APV1	AIK	APV	AIK1APV1	Glu+Sorbitol	-10	0.131157	0.0394829	0.0853198	0.0394829	0.131157	0.168304	(0.05,0.5]
AIK1	APV1	AIK	APV	AIK1APV1	Glucose	-10	0.00753623	-0.0613302	-0.026897	-0.0613302	0.00753623	0.168304	(0.05,0.5]
AIK1	APV1	AIK	APV	AIK1APV1	Glycerol	-10	0.0365608	0.176787	0.106674	0.0365608	0.176787	0.168304	(0.05,0.5]
AIK1	AST1	AIK	AST	AIK1AST1	Glu+Sorbitol	-10	0.131157	-1	-0.434422	-1	0.131157	0.308228	(0.05,0.5]
AIK1	AST1	AIK	AST	AIK1AST1	Glucose	-0.0368593	0.00753623	0.0143308	0.0109335	0.00753623	0.0143308	0.308228	(0.05,0.5]
AIK1	AST1	AIK	AST	AIK1AST1	Glycerol	-10	0.0365608	-1	-0.48172	-1	0.0365608	0.308228	(0.05,0.5]
AIK1	CCV1	AIK	CCV	AIK1CCV1	Glu+Sorbitol	-10	0.131157	0.107101	0.119129	0.107101	0.131157	1.45836	(1, 1.5]
AIK1	CCV1	AIK	CCV	AIK1CCV1	Glucose	-0.102687	0.00753623	0.044604	0.0260701	0.00753623	0.044604	1.45836	(1, 1.5]
AIK1	CCV1	AIK	CCV	AIK1CCV1	Glycerol	-10	0.0365608	-1	-0.48172	-1	0.0365608	1.45836	(1, 1.5]
AIK1	YAR1	AIK	YAR	AIK1YAR1	Glu+Sorbitol	-10	0.131157	-1	-0.434422	-1	0.131157	0.806216	(0.5,1]
AIK1	YAR1	AIK	YAR	AIK1YAR1	Glucose	-10	0.00753623	-0.0705407	-0.0315022	-0.0705407	0.00753623	0.806216	(0.5,1]
AIK1	YAR1	AIK	YAR	AIK1YAR1	Glycerol	-10	0.0365608	-1	-0.48172	-1	0.0365608	0.806216	(0.5,1]
AIK1	YBU1	AIK	YBU	AIK1YBU1	Glu+Sorbitol	-10	0.131157	-1	-0.434422	-1	0.131157	1.07908	(0.5,1]
AIK1	YBU1	AIK	YBU	AIK1YBU1	Glucose	-10	0.00753623	-10	-4.99623	-10	0.00753623	1.07908	(0.5,1]
AIK1	YBU1	AIK	YBU	AIK1YBU1	Glycerol	-10	0.0365608	-1	-0.48172	-1	0.0365608	1.07908	(0.5,1]
ALH1	AKB1	ALH	AKB	ALH1AKB1	Glu+Sorbitol	-0.15153	0.00684393	0.139707	0.0732754	0.00684393	0.139707	1.26425	(1, 1.5]
ALH1	AKB1	ALH	AKB	ALH1AKB1	Glucose	-0.0887625	-0.0834986	-0.0154866	-0.0494926	-0.0834986	-0.0154866	1.26425	(1, 1.5]
ALH1	AKB1	ALH	AKB	ALH1AKB1	Glycerol	-10	-1	-1	-1	-1	-1	1.26425	(1, 1.5]
ALH1	AKP1	ALH	AKP	ALH1AKP1	Glu+Sorbitol	-0.0375605	0.00684393	0.0982963	0.0525701	0.00684393	0.0982963	1.45994	(1, 1.5]
ALH1	AKP1	ALH	AKP	ALH1AKP1	Glucose	0.0161278	-0.0834986	-0.0557565	-0.0696275	-0.0834986	-0.0557565	1.45994	(1, 1.5]
ALH1	AKP1	ALH	AKP	ALH1AKP1	Glycerol	-10	-1	-0.109008	-0.554504	-1	-0.109008	1.45994	(1, 1.5]
ALH1	ALG1	ALH	ALG	ALH1ALG1	Glu+Sorbitol	-10	0.00684393	0.0868454	0.0468447	0.00684393	0.0868454	1.19978	(1, 1.5]
ALH1	ALG1	ALH	ALG	ALH1ALG1	Glucose	-10	-0.0834986	-0.141619	-0.112559	-0.141619	-0.0834986	1.19978	(1, 1.5]
ALH1	ALG1	ALH	ALG	ALH1ALG1	Glycerol	-10	-1	-0.0464457	-0.523223	-1	-0.0464457	1.19978	(1, 1.5]
ALH1	ANG1	ALH	ANG	ALH1ANG1	Glu+Sorbitol	-10	0.00684393	0.0628167	0.0348303	0.00684393	0.0628167	0.900154	(0.5,1]
ALH1	ANG1	ALH	ANG	ALH1ANG1	Glucose	-10	-0.0834986	0.0663533	-0.00857266	-0.0834986	0.0663533	0.900154	(0.5,1]
ALH1	ANG1	ALH	ANG	ALH1ANG1	Glycerol	-10	-1	-1	-1	-1	-1	0.900154	(0.5,1]
ALH1	AIM1	ALH	AIM	ALH1AIM1	Glu+Sorbitol	-10	0.00684393	-1	-0.496578	-1	0.00684393	1.48513	(1, 1.5]
ALH1	AIM1	ALH	AIM	ALH1AIM1	Glucose	-10	-0.0834986	-10	-5.04175	-10	-0.0834986	1.48513	(1, 1.5]
ALH1	AIM1	ALH	AIM	ALH1AIM1	Glycerol	-10	-1	-10	-5.5	-10	-1	1.48513	(1, 1.5]
ALH1	AKV1	ALH	AKV	ALH1AKV1	Glu+Sorbitol	-0.0462237	0.00684393	0.0943177	0.0505808	0.00684393	0.0943177	1.45981	(1, 1.5]
ALH1	AKV1	ALH	AKV	ALH1AKV1	Glucose	0.0219235	-0.0834986	-0.033945	-0.0587218	-0.0834986	-0.033945	1.45981	(1, 1.5]
ALH1	AKV1	ALH	AKV	ALH1AKV1	Glycerol	-1	-1	-0.0735332	-0.536767	-1	-0.0735332	1.45981	(1, 1.5]
ALH1	BBI1	ALH	BBI	ALH1BBI1	Glu+Sorbitol	-10	0.00684393	0.242166	0.124505	0.00684393	0.242166	1.46134	(1, 1.5]
ALH1	BBI1	ALH	BBI	ALH1BBI1	Glucose	-10	-0.0834986	0.0118567	-0.035821	-0.0834986	0.0118567	1.46134	(1, 1.5]
ALH1	BBI1	ALH	BBI	ALH1BBI1	Glycerol	-10	-1	-0.0628554	-0.531428	-1	-0.0628554	1.46134	(1, 1.5]
ALH1	BAK1	ALH	BAK	ALH1BAK1	Glu+Sorbitol	-10	0.00684393	0.0545167	0.0306803	0.00684393	0.0545167	1.33566	(1, 1.5]
ALH1	BAK1	ALH	BAK	ALH1BAK1	Glucose	0.0744226	-0.0834986	0.0639478	-0.00977539	-0.0834986	0.0639478	1.33566	(1, 1.5]
ALH1	BAK1	ALH	BAK	ALH1BAK1	Glycerol	0.0597822	-1	-0.00177197	-0.500886	-1	-0.00177197	1.33566	(1, 1.5]
ALH1	BEH1	ALH	BEH	ALH1BEH1	Glu+Sorbitol	-10	0.00684393	0.114205	0.0605243	0.00684393	0.114205	0.375246	(0.05,0.5]
ALH1	BEH1	ALH	BEH	ALH1BEH1	Glucose	-10	-0.0834986	-0.0314472	-0.0574729	-0.0834986	-0.0314472	0.375246	(0.05,0.5]
ALH1	BEH1	ALH	BEH	ALH1BEH1	Glycerol	-10	-1	-1	-1	-1	-1	0.375246	(0.05,0.5]
ALH1	BLA1	ALH	BLA	ALH1BLA1	Glu+Sorbitol	-10	0.00684393	-10	-4.99658	-10	0.00684393	1.46593	(1, 1.5]
ALH1	BLA1	ALH	BLA	ALH1BLA1	Glucose	-0.106392	-0.0834986	-10	-5.04175	-10	-0.0834986	1.46593	(1, 1.5]
ALH1	BLA1	ALH	BLA	ALH1BLA1	Glycerol	-10	-1	-10	-5.5	-10	-1	1.46593	(1, 1.5]
ALH1	BHM1	ALH	BHM	ALH1BHM1	Glu+Sorbitol	-10	0.00684393	-1	-0.496578	-1	0.00684393	1.4186	(1, 1.5]
ALH1	BHM1	ALH	BHM	ALH1BHM1	Glucose	-10	-0.0834986	-10	-5.04175	-10	-0.0834986	1.4186	(1, 1.5]
ALH1	BHM1	ALH	BHM	ALH1BHM1	Glycerol	-10	-1	-1	-1	-1	-1	1.4186	(1, 1.5]
ALH1	BHN1	ALH	BHN	ALH1BHN1	Glu+Sorbitol	-0.0312998	0.00684393	0.00750642	0.00717517	0.00684393	0.00750642	1.45504	(1, 1.5]
ALH1	BHN1	ALH	BHN	ALH1BHN1	Glucose	0.0225444	-0.0834986	-1	-0.541749	-1	-0.0834986	1.45504	(1, 1.5]
ALH1	BHN1	ALH	BHN	ALH1BHN1	Glycerol	-10	-1	-1	-1	-1	-1	1.45504	(1, 1.5]
ALH1	BHB1	ALH	BHB	ALH1BHB1	Glu+Sorbitol	-0.115545	0.00684393	-1	-0.496578	-1	0.00684393	1.45877	(1, 1.5]
ALH1	BHB1	ALH	BHB	ALH1BHB1	Glucose	-0.0581138	-0.0834986	-10	-5.04175	-10	-0.0834986	1.45877	(1, 1.5]
ALH1	BHB1	ALH	BHB	ALH1BHB1	Glycerol	-1	-1	-10	-5.5	-10	-1	1.45877	(1, 1.5]
ALH1	BLE1	ALH	BLE	ALH1BLE1	Glu+Sorbitol	-0.202502	0.00684393	-1	-0.496578	-1	0.00684393	1.46536	(1, 1.5]
ALH1	BLE1	ALH	BLE	ALH1BLE1	Glucose	-0.0820048	-0.0834986	-0.0748489	-0.0791738	-0.0834986	-0.0748489	1.46536	(1, 1.5]
ALH1	BLE1	ALH	BLE	ALH1BLE1	Glycerol	-10	-1	-0.044381	-0.52219	-1	-0.044381	1.46536	(1, 1.5]
ALH1	BHF1	ALH	BHF	ALH1BHF1	Glu+Sorbitol	-10	0.00684393	0.0591106	0.0329773	0.00684393	0.0591106	1.45532	(1, 1.5]
ALH1	BHF1	ALH	BHF	ALH1BHF1	Glucose	-0.0322834	-0.0834986	0.0612509	-0.0111239	-0.0834986	0.0612509	1.45532	(1, 1.5]
ALH1	BHF1	ALH	BHF	ALH1BHF1	Glycerol	-0.0482282	-1	0.0945635	-0.452718	-1	0.0945635	1.45532	(1, 1.5]
ALH1	BKR1	ALH	BKR	ALH1BKR1	Glu+Sorbitol	-10	0.00684393	-1	-0.496578	-1	0.00684393	1.46447	(1, 1.5]
ALH1	BKR1	ALH	BKR	ALH1BKR1	Glucose	-10	-0.0834986	-0.013402	-0.0484503	-0.0834986	-0.013402	1.46447	(1, 1.5]
ALH1	BKR1	ALH	BKR	ALH1BKR1	Glycerol	-10	-1	-1	-1	-1	-1	1.46447	(1, 1.5]
ALH1	BLL1	ALH	BLL	ALH1BLL1	Glu+Sorbitol	-10	0.00684393	-1	-0.496578	-1	0.00684393	1.46784	(1, 1.5]
ALH1	BLL1	ALH	BLL	ALH1BLL1	Glucose	-0.0280853	-0.0834986	-1	-0.541749	-1	-0.0834986	1.46784	(1, 1.5]
ALH1	BLL1	ALH	BLL	ALH1BLL1	Glycerol	-0.00425904	-1	0.120353	-0.439823	-1	0.120353	1.46784	(1, 1.5]
ALH1	BNI1	ALH	BNI	ALH1BNI1	Glu+Sorbitol	-10	0.00684393	-10	0.00684393	0.00684393	0.00684393	1.46559	(1, 1.5]
ALH1	BNI1	ALH	BNI	ALH1BNI1	Glucose	-10	-0.0834986	-10	-0.0834986	-0.0834986	-0.0834986	1.46559	(1, 1.5]
ALH1	BNI1	ALH	BNI	ALH1BNI1	Glycerol	0.0174579	-1	-10	-1	-1	-1	1.46559	(1, 1.5]
ALH1	BQG1	ALH	BQG	ALH1BQG1	Glu+Sorbitol	-10	0.00684393	0.133013	0.0699284	0.00684393	0.133013	1.46401	(1, 1.5]
ALH1	BQG1	ALH	BQG	ALH1BQG1	Glucose	-0.00614319	-0.0834986	-0.0571925	-0.0703456	-0.0834986	-0.0571925	1.46401	(1, 1.5]
ALH1	BQG1	ALH	BQG	ALH1BQG1	Glycerol	-0.0660277	-1	0.0537228	-0.473139	-1	0.0537228	1.46401	(1, 1.5]
ALH1	BNK1	ALH	BNK	ALH1BNK1	Glu+Sorbitol	-0.0508802	0.00684393	-1	-0.496578	-1	0.00684393	1.46487	(1, 1.5]
ALH1	BNK1	ALH	BNK	ALH1BNK1	Glucose	-0.0226252	-0.0834986	-0.0796816	-0.0815901	-0.0834986	-0.0796816	1.46487	(1, 1.5]
ALH1	BNK1	ALH	BNK	ALH1BNK1	Glycerol	0.0283117	-1	0.115878	-0.442061	-1	0.115878	1.46487	(1, 1.5]
ALH1	BPQ1	ALH	BPQ	ALH1BPQ1	Glu+Sorbitol	-0.0490948	0.00684393	0.196057	0.10145	0.00684393	0.196057	1.45418	(1, 1.5]
ALH1	BPQ1	ALH	BPQ	ALH1BPQ1	Glucose	0.0110925	-0.0834986	0.00714221	-0.0381782	-0.0834986	0.00714221	1.45418	(1, 1.5]
ALH1	BPQ1	ALH	BPQ	ALH1BPQ1	Glycerol	-0.0832286	-1	0.0632255	-0.468387	-1	0.0632255	1.45418	(1, 1.5]
ALH1	BQH1	ALH	BQH	ALH1BQH1	Glu+Sorbitol	-1	0.00684393	0.00347705	0.00516049	0.00347705	0.00684393	1.46883	(1, 1.5]
ALH1	BQH1	ALH	BQH	ALH1BQH1	Glucose	0.0117823	-0.0834986	0.0201877	-0.0316555	-0.0834986	0.0201877	1.46883	(1, 1.5]
ALH1	BQH1	ALH	BQH	ALH1BQH1	Glycerol	-10	-1	-1	-1	-1	-1	1.46883	(1, 1.5]
ALH1	BRA1	ALH	BRA	ALH1BRA1	Glu+Sorbitol	-10	0.00684393	0.0670496	0.0369468	0.00684393	0.0670496	1.458	(1, 1.5]
ALH1	BRA1	ALH	BRA	ALH1BRA1	Glucose	-10	-0.0834986	-0.0988197	-0.0911592	-0.0988197	-0.0834986	1.458	(1, 1.5]
ALH1	BRA1	ALH	BRA	ALH1BRA1	Glycerol	-10	-1	-1	-1	-1	-1	1.458	(1, 1.5]
ALH1	BLN1	ALH	BLN	ALH1BLN1	Glu+Sorbitol	-10	0.00684393	-10	0.00684393	0.00684393	0.00684393	1.46834	(1, 1.5]
ALH1	BLN1	ALH	BLN	ALH1BLN1	Glucose	-10	-0.0834986	-10	-0.0834986	-0.0834986	-0.0834986	1.46834	(1, 1.5]
ALH1	BLN1	ALH	BLN	ALH1BLN1	Glycerol	-10	-1	-10	-1	-1	-1	1.46834	(1, 1.5]
ALH1	BQI1	ALH	BQI	ALH1BQI1	Glu+Sorbitol	-10	0.00684393	0.143956	0.0753999	0.00684393	0.143956	1.46664	(1, 1.5]
ALH1	BQI1	ALH	BQI	ALH1BQI1	Glucose	-0.0250228	-0.0834986	-0.108288	-0.0958933	-0.108288	-0.0834986	1.46664	(1, 1.5]
ALH1	BQI1	ALH	BQI	ALH1BQI1	Glycerol	-10	-1	-0.01173	-0.505865	-1	-0.01173	1.46664	(1, 1.5]
ALH1	BRB1	ALH	BRB	ALH1BRB1	Glu+Sorbitol	-0.0596879	0.00684393	0.109832	0.0583382	0.00684393	0.109832	1.42854	(1, 1.5]
ALH1	BRB1	ALH	BRB	ALH1BRB1	Glucose	0.017552	-0.0834986	0.0350566	-0.024221	-0.0834986	0.0350566	1.42854	(1, 1.5]
ALH1	BRB1	ALH	BRB	ALH1BRB1	Glycerol	-0.0679351	-1	0.000627839	-0.499686	-1	0.000627839	1.42854	(1, 1.5]
ALH1	BLP1	ALH	BLP	ALH1BLP1	Glu+Sorbitol	-1	0.00684393	0.159343	0.0830936	0.00684393	0.159343	1.46876	(1, 1.5]
ALH1	BLP1	ALH	BLP	ALH1BLP1	Glucose	-10	-0.0834986	0.0477277	-0.0178855	-0.0834986	0.0477277	1.46876	(1, 1.5]
ALH1	BLP1	ALH	BLP	ALH1BLP1	Glycerol	-0.0488985	-1	0.0191829	-0.490409	-1	0.0191829	1.46876	(1, 1.5]
ALH1	BRC1	ALH	BRC	ALH1BRC1	Glu+Sorbitol	-10	0.00684393	0.107766	0.0573048	0.00684393	0.107766	1.45457	(1, 1.5]
ALH1	BRC1	ALH	BRC	ALH1BRC1	Glucose	-0.00542011	-0.0834986	-0.0843597	-0.0839291	-0.0843597	-0.0834986	1.45457	(1, 1.5]
ALH1	BRC1	ALH	BRC	ALH1BRC1	Glycerol	-10	-1	-0.0845599	-0.54228	-1	-0.0845599	1.45457	(1, 1.5]
ALH1	BPT1	ALH	BPT	ALH1BPT1	Glu+Sorbitol	-10	0.00684393	0.0437225	0.0252832	0.00684393	0.0437225	1.46311	(1, 1.5]
ALH1	BPT1	ALH	BPT	ALH1BPT1	Glucose	-0.02702	-0.0834986	-0.0226414	-0.05307	-0.0834986	-0.0226414	1.46311	(1, 1.5]
ALH1	BPT1	ALH	BPT	ALH1BPT1	Glycerol	-10	-1	0.0527905	-0.473605	-1	0.0527905	1.46311	(1, 1.5]
ALH1	BRD1	ALH	BRD	ALH1BRD1	Glu+Sorbitol	-0.110157	0.00684393	0.0462453	0.0265446	0.00684393	0.0462453	1.46436	(1, 1.5]
ALH1	BRD1	ALH	BRD	ALH1BRD1	Glucose	0.0271641	-0.0834986	-0.0248454	-0.054172	-0.0834986	-0.0248454	1.46436	(1, 1.5]
ALH1	BRD1	ALH	BRD	ALH1BRD1	Glycerol	-0.0179764	-1	0.10436	-0.44782	-1	0.10436	1.46436	(1, 1.5]
ALH1	BMK1	ALH	BMK	ALH1BMK1	Glu+Sorbitol	-10	0.00684393	0.10245	0.054647	0.00684393	0.10245	1.46558	(1, 1.5]
ALH1	BMK1	ALH	BMK	ALH1BMK1	Glucose	-0.0394272	-0.0834986	0.0206207	-0.0314389	-0.0834986	0.0206207	1.46558	(1, 1.5]
ALH1	BMK1	ALH	BMK	ALH1BMK1	Glycerol	-0.0423487	-1	0.0727937	-0.463603	-1	0.0727937	1.46558	(1, 1.5]
ALH1	BQP1	ALH	BQP	ALH1BQP1	Glu+Sorbitol	-0.109483	0.00684393	0.108223	0.0575337	0.00684393	0.108223	1.43813	(1, 1.5]
ALH1	BQP1	ALH	BQP	ALH1BQP1	Glucose	-0.0373889	-0.0834986	0.0119541	-0.0357723	-0.0834986	0.0119541	1.43813	(1, 1.5]
ALH1	BQP1	ALH	BQP	ALH1BQP1	Glycerol	-10	-1	-0.0301991	-0.5151	-1	-0.0301991	1.43813	(1, 1.5]
ALH1	BLV1	ALH	BLV	ALH1BLV1	Glu+Sorbitol	-10	0.00684393	0.148788	0.0778159	0.00684393	0.148788	1.46396	(1, 1.5]
ALH1	BLV1	ALH	BLV	ALH1BLV1	Glucose	-0.0138179	-0.0834986	-0.0681483	-0.0758234	-0.0834986	-0.0681483	1.46396	(1, 1.5]
ALH1	BLV1	ALH	BLV	ALH1BLV1	Glycerol	0.0099999	-1	0.0838921	-0.458054	-1	0.0838921	1.46396	(1, 1.5]
ALH1	BQQ1	ALH	BQQ	ALH1BQQ1	Glu+Sorbitol	-10	0.00684393	0.0432009	0.0250224	0.00684393	0.0432009	1.46582	(1, 1.5]
ALH1	BQQ1	ALH	BQQ	ALH1BQQ1	Glucose	-0.0949103	-0.0834986	0.0291802	-0.0271592	-0.0834986	0.0291802	1.46582	(1, 1.5]
ALH1	BQQ1	ALH	BQQ	ALH1BQQ1	Glycerol	-10	-1	0.0824425	-0.458779	-1	0.0824425	1.46582	(1, 1.5]
ALH1	BMA1	ALH	BMA	ALH1BMA1	Glu+Sorbitol	-1	0.00684393	0.0267219	0.0167829	0.00684393	0.0267219	1.3358	(1, 1.5]
ALH1	BMA1	ALH	BMA	ALH1BMA1	Glucose	-0.1195	-0.0834986	0.0277247	-0.027887	-0.0834986	0.0277247	1.3358	(1, 1.5]
ALH1	BMA1	ALH	BMA	ALH1BMA1	Glycerol	-0.0717614	-1	0.0885346	-0.455733	-1	0.0885346	1.3358	(1, 1.5]
ALH1	BQR1	ALH	BQR	ALH1BQR1	Glu+Sorbitol	-0.075751	0.00684393	0.0524282	0.0296361	0.00684393	0.0524282	1.46475	(1, 1.5]
ALH1	BQR1	ALH	BQR	ALH1BQR1	Glucose	-0.0356921	-0.0834986	-0.0545715	-0.0690351	-0.0834986	-0.0545715	1.46475	(1, 1.5]
ALH1	BQR1	ALH	BQR	ALH1BQR1	Glycerol	-0.0158763	-1	0.0588489	-0.470576	-1	0.0588489	1.46475	(1, 1.5]
ALH1	CAD1	ALH	CAD	ALH1CAD1	Glu+Sorbitol	-10	0.00684393	0.0934632	0.0501536	0.00684393	0.0934632	1.4937	(1, 1.5]
ALH1	CAD1	ALH	CAD	ALH1CAD1	Glucose	-10	-0.0834986	-0.0194773	-0.051488	-0.0834986	-0.0194773	1.4937	(1, 1.5]
ALH1	CAD1	ALH	CAD	ALH1CAD1	Glycerol	-10	-1	-10	-5.5	-10	-1	1.4937	(1, 1.5]
ALH1	BSB1	ALH	BSB	ALH1BSB1	Glu+Sorbitol	-10	0.00684393	-10	-4.99658	-10	0.00684393	1.46287	(1, 1.5]
ALH1	BSB1	ALH	BSB	ALH1BSB1	Glucose	-10	-0.0834986	-10	-0.0834986	-0.0834986	-0.0834986	1.46287	(1, 1.5]
ALH1	BSB1	ALH	BSB	ALH1BSB1	Glycerol	-10	-1	-10	-1	-1	-1	1.46287	(1, 1.5]
ALH1	BTH1	ALH	BTH	ALH1BTH1	Glu+Sorbitol	-0.0536165	0.00684393	0.0555657	0.0312048	0.00684393	0.0555657	1.45892	(1, 1.5]
ALH1	BTH1	ALH	BTH	ALH1BTH1	Glucose	-1	-0.0834986	-0.01391	-0.0487043	-0.0834986	-0.01391	1.45892	(1, 1.5]
ALH1	BTH1	ALH	BTH	ALH1BTH1	Glycerol	-10	-1	-1	-1	-1	-1	1.45892	(1, 1.5]
ALH1	AHP1	ALH	AHP	ALH1AHP1	Glu+Sorbitol	-10	0.00684393	-1	-0.496578	-1	0.00684393	1.4997	(1, 1.5]
ALH1	AHP1	ALH	AHP	ALH1AHP1	Glucose	-10	-0.0834986	-1	-0.541749	-1	-0.0834986	1.4997	(1, 1.5]
ALH1	AHP1	ALH	AHP	ALH1AHP1	Glycerol	-1	-1	0.0888156	-0.455592	-1	0.0888156	1.4997	(1, 1.5]
ALH1	CQD1	ALH	CQD	ALH1CQD1	Glu+Sorbitol	-10	0.00684393	0.0454048	0.0261244	0.00684393	0.0454048	1.28342	(1, 1.5]
ALH1	CQD1	ALH	CQD	ALH1CQD1	Glucose	-0.0151237	-0.0834986	0.0106465	-0.036426	-0.0834986	0.0106465	1.28342	(1, 1.5]
ALH1	CQD1	ALH	CQD	ALH1CQD1	Glycerol	-10	-1	-10	-5.5	-10	-1	1.28342	(1, 1.5]
ALH1	APV1	ALH	APV	ALH1APV1	Glu+Sorbitol	-0.187761	0.00684393	0.0394829	0.0231634	0.00684393	0.0394829	1.46483	(1, 1.5]
ALH1	APV1	ALH	APV	ALH1APV1	Glucose	-10	-0.0834986	-0.0613302	-0.0724144	-0.0834986	-0.0613302	1.46483	(1, 1.5]
ALH1	APV1	ALH	APV	ALH1APV1	Glycerol	-0.0123369	-1	0.176787	-0.411606	-1	0.176787	1.46483	(1, 1.5]
ALH1	AST1	ALH	AST	ALH1AST1	Glu+Sorbitol	-10	0.00684393	-1	-0.496578	-1	0.00684393	1.39973	(1, 1.5]
ALH1	AST1	ALH	AST	ALH1AST1	Glucose	0.0134945	-0.0834986	0.0143308	-0.0345839	-0.0834986	0.0143308	1.39973	(1, 1.5]
ALH1	AST1	ALH	AST	ALH1AST1	Glycerol	-10	-1	-1	-1	-1	-1	1.39973	(1, 1.5]
ALH1	CCV1	ALH	CCV	ALH1CCV1	Glu+Sorbitol	-0.0322621	0.00684393	0.107101	0.0569723	0.00684393	0.107101	0.965627	(0.5,1]
ALH1	CCV1	ALH	CCV	ALH1CCV1	Glucose	0.0232052	-0.0834986	0.044604	-0.0194473	-0.0834986	0.044604	0.965627	(0.5,1]
ALH1	CCV1	ALH	CCV	ALH1CCV1	Glycerol	-10	-1	-1	-1	-1	-1	0.965627	(0.5,1]
ALH1	YAR1	ALH	YAR	ALH1YAR1	Glu+Sorbitol	-10	0.00684393	-1	-0.496578	-1	0.00684393	1.1428	(1, 1.5]
ALH1	YAR1	ALH	YAR	ALH1YAR1	Glucose	-0.014484	-0.0834986	-0.0705407	-0.0770197	-0.0834986	-0.0705407	1.1428	(1, 1.5]
ALH1	YAR1	ALH	YAR	ALH1YAR1	Glycerol	-0.0913139	-1	-1	-1	-1	-1	1.1428	(1, 1.5]
ALH1	YBU1	ALH	YBU	ALH1YBU1	Glu+Sorbitol	-10	0.00684393	-1	-0.496578	-1	0.00684393	0.811618	(0.5,1]
ALH1	YBU1	ALH	YBU	ALH1YBU1	Glucose	-10	-0.0834986	-10	-5.04175	-10	-0.0834986	0.811618	(0.5,1]
ALH1	YBU1	ALH	YBU	ALH1YBU1	Glycerol	-10	-1	-1	-1	-1	-1	0.811618	(0.5,1]
AIM1	AKB1	AIM	AKB	AIM1AKB1	Glu+Sorbitol	-10	-10	0.139707	-4.93015	-10	0.139707	1.55717	(1, 1.5]
AIM1	AKB1	AIM	AKB	AIM1AKB1	Glucose	-10	-1	-0.0154866	-0.507743	-1	-0.0154866	1.55717	(1, 1.5]
AIM1	AKB1	AIM	AKB	AIM1AKB1	Glycerol	-10	-10	-1	-5.5	-10	-1	1.55717	(1, 1.5]
AIM1	AKP1	AIM	AKP	AIM1AKP1	Glu+Sorbitol	-10	-10	0.0982963	-4.95085	-10	0.0982963	0.27223	(0.05,0.5]
AIM1	AKP1	AIM	AKP	AIM1AKP1	Glucose	-1	-1	-0.0557565	-0.527878	-1	-0.0557565	0.27223	(0.05,0.5]
AIM1	AKP1	AIM	AKP	AIM1AKP1	Glycerol	-10	-10	-0.109008	-5.0545	-10	-0.109008	0.27223	(0.05,0.5]
AIM1	ALG1	AIM	ALG	AIM1ALG1	Glu+Sorbitol	-10	-10	0.0868454	-4.95658	-10	0.0868454	0.832878	(0.5,1]
AIM1	ALG1	AIM	ALG	AIM1ALG1	Glucose	-10	-1	-0.141619	-0.570809	-1	-0.141619	0.832878	(0.5,1]
AIM1	ALG1	AIM	ALG	AIM1ALG1	Glycerol	-10	-10	-0.0464457	-5.02322	-10	-0.0464457	0.832878	(0.5,1]
AIM1	ANG1	AIM	ANG	AIM1ANG1	Glu+Sorbitol	-10	-10	0.0628167	-4.96859	-10	0.0628167	1.34695	(1, 1.5]
AIM1	ANG1	AIM	ANG	AIM1ANG1	Glucose	-10	-1	0.0663533	-0.466823	-1	0.0663533	1.34695	(1, 1.5]
AIM1	ANG1	AIM	ANG	AIM1ANG1	Glycerol	-10	-10	-1	-5.5	-10	-1	1.34695	(1, 1.5]
AIM1	AIM1	AIM	AIM	AIM1AIM1	Glu+Sorbitol	-10	-10	-1	-5.5	-10	-1	0	(0,0.05]
AIM1	AIM1	AIM	AIM	AIM1AIM1	Glucose	-10	-1	-10	-5.5	-10	-1	0	(0,0.05]
AIM1	AIM1	AIM	AIM	AIM1AIM1	Glycerol	-10	-10	-10	-10	-10	-10	0	(0,0.05]
AIM1	AKV1	AIM	AKV	AIM1AKV1	Glu+Sorbitol	-10	-10	0.0943177	-4.95284	-10	0.0943177	0.272524	(0.05,0.5]
AIM1	AKV1	AIM	AKV	AIM1AKV1	Glucose	-10	-1	-0.033945	-0.516972	-1	-0.033945	0.272524	(0.05,0.5]
AIM1	AKV1	AIM	AKV	AIM1AKV1	Glycerol	-10	-10	-0.0735332	-5.03677	-10	-0.0735332	0.272524	(0.05,0.5]
AIM1	BBI1	AIM	BBI	AIM1BBI1	Glu+Sorbitol	-10	-10	0.242166	-4.87892	-10	0.242166	0.276647	(0.05,0.5]
AIM1	BBI1	AIM	BBI	AIM1BBI1	Glucose	-10	-1	0.0118567	-0.494072	-1	0.0118567	0.276647	(0.05,0.5]
AIM1	BBI1	AIM	BBI	AIM1BBI1	Glycerol	-10	-10	-0.0628554	-5.03143	-10	-0.0628554	0.276647	(0.05,0.5]
AIM1	BAK1	AIM	BAK	AIM1BAK1	Glu+Sorbitol	-10	-10	0.0545167	-4.97274	-10	0.0545167	1.48924	(1, 1.5]
AIM1	BAK1	AIM	BAK	AIM1BAK1	Glucose	-10	-1	0.0639478	-0.468026	-1	0.0639478	1.48924	(1, 1.5]
AIM1	BAK1	AIM	BAK	AIM1BAK1	Glycerol	-10	-10	-0.00177197	-5.00089	-10	-0.00177197	1.48924	(1, 1.5]
AIM1	BEH1	AIM	BEH	AIM1BEH1	Glu+Sorbitol	-10	-10	0.114205	-4.9429	-10	0.114205	1.48404	(1, 1.5]
AIM1	BEH1	AIM	BEH	AIM1BEH1	Glucose	-10	-1	-0.0314472	-0.515724	-1	-0.0314472	1.48404	(1, 1.5]
AIM1	BEH1	AIM	BEH	AIM1BEH1	Glycerol	-10	-10	-1	-5.5	-10	-1	1.48404	(1, 1.5]
AIM1	BLA1	AIM	BLA	AIM1BLA1	Glu+Sorbitol	-10	-10	-10	-10	-10	-10	0.266235	(0.05,0.5]
AIM1	BLA1	AIM	BLA	AIM1BLA1	Glucose	-10	-1	-10	-5.5	-10	-1	0.266235	(0.05,0.5]
AIM1	BLA1	AIM	BLA	AIM1BLA1	Glycerol	-10	-10	-10	-10	-10	-10	0.266235	(0.05,0.5]
AIM1	BHM1	AIM	BHM	AIM1BHM1	Glu+Sorbitol	-10	-10	-1	-5.5	-10	-1	0.348531	(0.05,0.5]
AIM1	BHM1	AIM	BHM	AIM1BHM1	Glucose	-10	-1	-10	-5.5	-10	-1	0.348531	(0.05,0.5]
AIM1	BHM1	AIM	BHM	AIM1BHM1	Glycerol	-10	-10	-1	-5.5	-10	-1	0.348531	(0.05,0.5]
AIM1	BHN1	AIM	BHN	AIM1BHN1	Glu+Sorbitol	-10	-10	0.00750642	-4.99625	-10	0.00750642	0.278072	(0.05,0.5]
AIM1	BHN1	AIM	BHN	AIM1BHN1	Glucose	-10	-1	-1	-1	-1	-1	0.278072	(0.05,0.5]
AIM1	BHN1	AIM	BHN	AIM1BHN1	Glycerol	-10	-10	-1	-5.5	-10	-1	0.278072	(0.05,0.5]
AIM1	BHB1	AIM	BHB	AIM1BHB1	Glu+Sorbitol	-10	-10	-1	-5.5	-10	-1	0.284677	(0.05,0.5]
AIM1	BHB1	AIM	BHB	AIM1BHB1	Glucose	-10	-1	-10	-5.5	-10	-1	0.284677	(0.05,0.5]
AIM1	BHB1	AIM	BHB	AIM1BHB1	Glycerol	-10	-10	-10	-10	-10	-10	0.284677	(0.05,0.5]
AIM1	BLE1	AIM	BLE	AIM1BLE1	Glu+Sorbitol	-10	-10	-1	-5.5	-10	-1	0.26877	(0.05,0.5]
AIM1	BLE1	AIM	BLE	AIM1BLE1	Glucose	-10	-1	-0.0748489	-0.537424	-1	-0.0748489	0.26877	(0.05,0.5]
AIM1	BLE1	AIM	BLE	AIM1BLE1	Glycerol	-10	-10	-0.044381	-5.02219	-10	-0.044381	0.26877	(0.05,0.5]
AIM1	BHF1	AIM	BHF	AIM1BHF1	Glu+Sorbitol	-10	-10	0.0591106	-4.97044	-10	0.0591106	0.261596	(0.05,0.5]
AIM1	BHF1	AIM	BHF	AIM1BHF1	Glucose	-10	-1	0.0612509	-0.469375	-1	0.0612509	0.261596	(0.05,0.5]
AIM1	BHF1	AIM	BHF	AIM1BHF1	Glycerol	-1	-10	0.0945635	-4.95272	-10	0.0945635	0.261596	(0.05,0.5]
AIM1	BKR1	AIM	BKR	AIM1BKR1	Glu+Sorbitol	-10	-10	-1	-5.5	-10	-1	0.271068	(0.05,0.5]
AIM1	BKR1	AIM	BKR	AIM1BKR1	Glucose	-10	-1	-0.013402	-0.506701	-1	-0.013402	0.271068	(0.05,0.5]
AIM1	BKR1	AIM	BKR	AIM1BKR1	Glycerol	-10	-10	-1	-5.5	-10	-1	0.271068	(0.05,0.5]
AIM1	BLL1	AIM	BLL	AIM1BLL1	Glu+Sorbitol	-10	-10	-1	-5.5	-10	-1	0.268367	(0.05,0.5]
AIM1	BLL1	AIM	BLL	AIM1BLL1	Glucose	-10	-1	-1	-1	-1	-1	0.268367	(0.05,0.5]
AIM1	BLL1	AIM	BLL	AIM1BLL1	Glycerol	-1	-10	0.120353	-4.93982	-10	0.120353	0.268367	(0.05,0.5]
AIM1	BNI1	AIM	BNI	AIM1BNI1	Glu+Sorbitol	-10	-10	-10	-10	-10	-10	0.273356	(0.05,0.5]
AIM1	BNI1	AIM	BNI	AIM1BNI1	Glucose	-10	-1	-10	-1	-1	-1	0.273356	(0.05,0.5]
AIM1	BNI1	AIM	BNI	AIM1BNI1	Glycerol	-10	-10	-10	-10	-10	-10	0.273356	(0.05,0.5]
AIM1	BQG1	AIM	BQG	AIM1BQG1	Glu+Sorbitol	-10	-10	0.133013	-4.93349	-10	0.133013	0.269715	(0.05,0.5]
AIM1	BQG1	AIM	BQG	AIM1BQG1	Glucose	-10	-1	-0.0571925	-0.528596	-1	-0.0571925	0.269715	(0.05,0.5]
AIM1	BQG1	AIM	BQG	AIM1BQG1	Glycerol	-10	-10	0.0537228	-4.97314	-10	0.0537228	0.269715	(0.05,0.5]
AIM1	BNK1	AIM	BNK	AIM1BNK1	Glu+Sorbitol	-10	-10	-1	-5.5	-10	-1	0.266098	(0.05,0.5]
AIM1	BNK1	AIM	BNK	AIM1BNK1	Glucose	-10	-1	-0.0796816	-0.539841	-1	-0.0796816	0.266098	(0.05,0.5]
AIM1	BNK1	AIM	BNK	AIM1BNK1	Glycerol	-10	-10	0.115878	-4.94206	-10	0.115878	0.266098	(0.05,0.5]
AIM1	BPQ1	AIM	BPQ	AIM1BPQ1	Glu+Sorbitol	-10	-10	0.196057	-4.90197	-10	0.196057	0.289865	(0.05,0.5]
AIM1	BPQ1	AIM	BPQ	AIM1BPQ1	Glucose	-1	-1	0.00714221	-0.496429	-1	0.00714221	0.289865	(0.05,0.5]
AIM1	BPQ1	AIM	BPQ	AIM1BPQ1	Glycerol	-10	-10	0.0632255	-4.96839	-10	0.0632255	0.289865	(0.05,0.5]
AIM1	BQH1	AIM	BQH	AIM1BQH1	Glu+Sorbitol	-10	-10	0.00347705	-4.99826	-10	0.00347705	0.268434	(0.05,0.5]
AIM1	BQH1	AIM	BQH	AIM1BQH1	Glucose	-10	-1	0.0201877	-0.489906	-1	0.0201877	0.268434	(0.05,0.5]
AIM1	BQH1	AIM	BQH	AIM1BQH1	Glycerol	-10	-10	-1	-5.5	-10	-1	0.268434	(0.05,0.5]
AIM1	BRA1	AIM	BRA	AIM1BRA1	Glu+Sorbitol	-10	-10	0.0670496	-4.96648	-10	0.0670496	0.279773	(0.05,0.5]
AIM1	BRA1	AIM	BRA	AIM1BRA1	Glucose	-10	-1	-0.0988197	-0.54941	-1	-0.0988197	0.279773	(0.05,0.5]
AIM1	BRA1	AIM	BRA	AIM1BRA1	Glycerol	-10	-10	-1	-5.5	-10	-1	0.279773	(0.05,0.5]
AIM1	BLN1	AIM	BLN	AIM1BLN1	Glu+Sorbitol	-10	-10	-10	-10	-10	-10	0.265925	(0.05,0.5]
AIM1	BLN1	AIM	BLN	AIM1BLN1	Glucose	-10	-1	-10	-1	-1	-1	0.265925	(0.05,0.5]
AIM1	BLN1	AIM	BLN	AIM1BLN1	Glycerol	-10	-10	-10	-10	-10	-10	0.265925	(0.05,0.5]
AIM1	BQI1	AIM	BQI	AIM1BQI1	Glu+Sorbitol	-10	-10	0.143956	-4.92802	-10	0.143956	0.267161	(0.05,0.5]
AIM1	BQI1	AIM	BQI	AIM1BQI1	Glucose	-10	-1	-0.108288	-0.554144	-1	-0.108288	0.267161	(0.05,0.5]
AIM1	BQI1	AIM	BQI	AIM1BQI1	Glycerol	-10	-10	-0.01173	-5.00587	-10	-0.01173	0.267161	(0.05,0.5]
AIM1	BRB1	AIM	BRB	AIM1BRB1	Glu+Sorbitol	-10	-10	0.109832	-4.94508	-10	0.109832	0.348494	(0.05,0.5]
AIM1	BRB1	AIM	BRB	AIM1BRB1	Glucose	-0.11427	-1	0.0350566	-0.482472	-1	0.0350566	0.348494	(0.05,0.5]
AIM1	BRB1	AIM	BRB	AIM1BRB1	Glycerol	-1	-10	0.000627839	-4.99969	-10	0.000627839	0.348494	(0.05,0.5]
AIM1	BLP1	AIM	BLP	AIM1BLP1	Glu+Sorbitol	-10	-10	0.159343	-4.92033	-10	0.159343	0.266216	(0.05,0.5]
AIM1	BLP1	AIM	BLP	AIM1BLP1	Glucose	-10	-1	0.0477277	-0.476136	-1	0.0477277	0.266216	(0.05,0.5]
AIM1	BLP1	AIM	BLP	AIM1BLP1	Glycerol	-10	-10	0.0191829	-4.99041	-10	0.0191829	0.266216	(0.05,0.5]
AIM1	BRC1	AIM	BRC	AIM1BRC1	Glu+Sorbitol	-10	-10	0.107766	-4.94612	-10	0.107766	0.276346	(0.05,0.5]
AIM1	BRC1	AIM	BRC	AIM1BRC1	Glucose	-10	-1	-0.0843597	-0.54218	-1	-0.0843597	0.276346	(0.05,0.5]
AIM1	BRC1	AIM	BRC	AIM1BRC1	Glycerol	-10	-10	-0.0845599	-5.04228	-10	-0.0845599	0.276346	(0.05,0.5]
AIM1	BPT1	AIM	BPT	AIM1BPT1	Glu+Sorbitol	-10	-10	0.0437225	-4.97814	-10	0.0437225	0.261432	(0.05,0.5]
AIM1	BPT1	AIM	BPT	AIM1BPT1	Glucose	-10	-1	-0.0226414	-0.511321	-1	-0.0226414	0.261432	(0.05,0.5]
AIM1	BPT1	AIM	BPT	AIM1BPT1	Glycerol	-10	-10	0.0527905	-4.9736	-10	0.0527905	0.261432	(0.05,0.5]
AIM1	BRD1	AIM	BRD	AIM1BRD1	Glu+Sorbitol	-10	-10	0.0462453	-4.97688	-10	0.0462453	0.264681	(0.05,0.5]
AIM1	BRD1	AIM	BRD	AIM1BRD1	Glucose	-0.0119832	-1	-0.0248454	-0.512423	-1	-0.0248454	0.264681	(0.05,0.5]
AIM1	BRD1	AIM	BRD	AIM1BRD1	Glycerol	-0.00371787	-10	0.10436	-4.94782	-10	0.10436	0.264681	(0.05,0.5]
AIM1	BMK1	AIM	BMK	AIM1BMK1	Glu+Sorbitol	-10	-10	0.10245	-4.94877	-10	0.10245	0.261719	(0.05,0.5]
AIM1	BMK1	AIM	BMK	AIM1BMK1	Glucose	-10	-1	0.0206207	-0.48969	-1	0.0206207	0.261719	(0.05,0.5]
AIM1	BMK1	AIM	BMK	AIM1BMK1	Glycerol	-10	-10	0.0727937	-4.9636	-10	0.0727937	0.261719	(0.05,0.5]
AIM1	BQP1	AIM	BQP	AIM1BQP1	Glu+Sorbitol	-10	-10	0.108223	-4.94589	-10	0.108223	0.309614	(0.05,0.5]
AIM1	BQP1	AIM	BQP	AIM1BQP1	Glucose	-1	-1	0.0119541	-0.494023	-1	0.0119541	0.309614	(0.05,0.5]
AIM1	BQP1	AIM	BQP	AIM1BQP1	Glycerol	-10	-10	-0.0301991	-5.0151	-10	-0.0301991	0.309614	(0.05,0.5]
AIM1	BLV1	AIM	BLV	AIM1BLV1	Glu+Sorbitol	-10	-10	0.148788	-4.92561	-10	0.148788	0.269558	(0.05,0.5]
AIM1	BLV1	AIM	BLV	AIM1BLV1	Glucose	-10	-1	-0.0681483	-0.534074	-1	-0.0681483	0.269558	(0.05,0.5]
AIM1	BLV1	AIM	BLV	AIM1BLV1	Glycerol	-10	-10	0.0838921	-4.95805	-10	0.0838921	0.269558	(0.05,0.5]
AIM1	BQQ1	AIM	BQQ	AIM1BQQ1	Glu+Sorbitol	-10	-10	0.0432009	-4.9784	-10	0.0432009	0.265526	(0.05,0.5]
AIM1	BQQ1	AIM	BQQ	AIM1BQQ1	Glucose	-10	-1	0.0291802	-0.48541	-1	0.0291802	0.265526	(0.05,0.5]
AIM1	BQQ1	AIM	BQQ	AIM1BQQ1	Glycerol	-10	-10	0.0824425	-4.95878	-10	0.0824425	0.265526	(0.05,0.5]
AIM1	BMA1	AIM	BMA	AIM1BMA1	Glu+Sorbitol	-10	-10	0.0267219	-4.98664	-10	0.0267219	1.58534	(1, 1.5]
AIM1	BMA1	AIM	BMA	AIM1BMA1	Glucose	-10	-1	0.0277247	-0.486138	-1	0.0277247	1.58534	(1, 1.5]
AIM1	BMA1	AIM	BMA	AIM1BMA1	Glycerol	-10	-10	0.0885346	-4.95573	-10	0.0885346	1.58534	(1, 1.5]
AIM1	BQR1	AIM	BQR	AIM1BQR1	Glu+Sorbitol	-10	-10	0.0524282	-4.97379	-10	0.0524282	0.264221	(0.05,0.5]
AIM1	BQR1	AIM	BQR	AIM1BQR1	Glucose	-10	-1	-0.0545715	-0.527286	-1	-0.0545715	0.264221	(0.05,0.5]
AIM1	BQR1	AIM	BQR	AIM1BQR1	Glycerol	-10	-10	0.0588489	-4.97058	-10	0.0588489	0.264221	(0.05,0.5]
AIM1	CAD1	AIM	CAD	AIM1CAD1	Glu+Sorbitol	-10	-10	0.0934632	-4.95327	-10	0.0934632	0.249474	(0.05,0.5]
AIM1	CAD1	AIM	CAD	AIM1CAD1	Glucose	-10	-1	-0.0194773	-0.509739	-1	-0.0194773	0.249474	(0.05,0.5]
AIM1	CAD1	AIM	CAD	AIM1CAD1	Glycerol	-10	-10	-10	-10	-10	-10	0.249474	(0.05,0.5]
AIM1	BSB1	AIM	BSB	AIM1BSB1	Glu+Sorbitol	-10	-10	-10	-10	-10	-10	0.262629	(0.05,0.5]
AIM1	BSB1	AIM	BSB	AIM1BSB1	Glucose	-10	-1	-10	-1	-1	-1	0.262629	(0.05,0.5]
AIM1	BSB1	AIM	BSB	AIM1BSB1	Glycerol	-10	-10	-10	-10	-10	-10	0.262629	(0.05,0.5]
AIM1	BTH1	AIM	BTH	AIM1BTH1	Glu+Sorbitol	-10	-10	0.0555657	-4.97222	-10	0.0555657	0.265926	(0.05,0.5]
AIM1	BTH1	AIM	BTH	AIM1BTH1	Glucose	-10	-1	-0.01391	-0.506955	-1	-0.01391	0.265926	(0.05,0.5]
AIM1	BTH1	AIM	BTH	AIM1BTH1	Glycerol	-10	-10	-1	-5.5	-10	-1	0.265926	(0.05,0.5]
AIM1	AHP1	AIM	AHP	AIM1AHP1	Glu+Sorbitol	-10	-10	-1	-5.5	-10	-1	0.258145	(0.05,0.5]
AIM1	AHP1	AIM	AHP	AIM1AHP1	Glucose	-10	-1	-1	-1	-1	-1	0.258145	(0.05,0.5]
AIM1	AHP1	AIM	AHP	AIM1AHP1	Glycerol	-10	-10	0.0888156	-4.95559	-10	0.0888156	0.258145	(0.05,0.5]
AIM1	CQD1	AIM	CQD	AIM1CQD1	Glu+Sorbitol	-10	-10	0.0454048	-4.9773	-10	0.0454048	0.825001	(0.5,1]
AIM1	CQD1	AIM	CQD	AIM1CQD1	Glucose	-10	-1	0.0106465	-0.494677	-1	0.0106465	0.825001	(0.5,1]
AIM1	CQD1	AIM	CQD	AIM1CQD1	Glycerol	-10	-10	-10	-10	-10	-10	0.825001	(0.5,1]
AIM1	APV1	AIM	APV	AIM1APV1	Glu+Sorbitol	-10	-10	0.0394829	-4.98026	-10	0.0394829	0.26515	(0.05,0.5]
AIM1	APV1	AIM	APV	AIM1APV1	Glucose	-10	-1	-0.0613302	-0.530665	-1	-0.0613302	0.26515	(0.05,0.5]
AIM1	APV1	AIM	APV	AIM1APV1	Glycerol	-10	-10	0.176787	-4.91161	-10	0.176787	0.26515	(0.05,0.5]
AIM1	AST1	AIM	AST	AIM1AST1	Glu+Sorbitol	-10	-10	-1	-5.5	-10	-1	0.3895	(0.05,0.5]
AIM1	AST1	AIM	AST	AIM1AST1	Glucose	-10	-1	0.0143308	-0.492835	-1	0.0143308	0.3895	(0.05,0.5]
AIM1	AST1	AIM	AST	AIM1AST1	Glycerol	-10	-10	-1	-5.5	-10	-1	0.3895	(0.05,0.5]
AIM1	CCV1	AIM	CCV	AIM1CCV1	Glu+Sorbitol	-10	-10	0.107101	-4.94645	-10	0.107101	1.47885	(1, 1.5]
AIM1	CCV1	AIM	CCV	AIM1CCV1	Glucose	-10	-1	0.044604	-0.477698	-1	0.044604	1.47885	(1, 1.5]
AIM1	CCV1	AIM	CCV	AIM1CCV1	Glycerol	-10	-10	-1	-5.5	-10	-1	1.47885	(1, 1.5]
AIM1	YAR1	AIM	YAR	AIM1YAR1	Glu+Sorbitol	-10	-10	-1	-5.5	-10	-1	0.857876	(0.5,1]
AIM1	YAR1	AIM	YAR	AIM1YAR1	Glucose	-10	-1	-0.0705407	-0.53527	-1	-0.0705407	0.857876	(0.5,1]
AIM1	YAR1	AIM	YAR	AIM1YAR1	Glycerol	-10	-10	-1	-5.5	-10	-1	0.857876	(0.5,1]
AIM1	YBU1	AIM	YBU	AIM1YBU1	Glu+Sorbitol	-10	-10	-1	-5.5	-10	-1	1.10414	(1, 1.5]
AIM1	YBU1	AIM	YBU	AIM1YBU1	Glucose	-10	-1	-10	-5.5	-10	-1	1.10414	(1, 1.5]
AIM1	YBU1	AIM	YBU	AIM1YBU1	Glycerol	-10	-10	-1	-5.5	-10	-1	1.10414	(1, 1.5]
AKS1	AKB1	AKS	AKB	AKS1AKB1	Glu+Sorbitol	0.0113524	-0.0413735	0.139707	0.0491666	-0.0413735	0.139707	1.28017	(1, 1.5]
AKS1	AKB1	AKS	AKB	AKS1AKB1	Glucose	0.0593533	-0.128884	-0.0154866	-0.0721852	-0.128884	-0.0154866	1.28017	(1, 1.5]
AKS1	AKB1	AKS	AKB	AKS1AKB1	Glycerol	-10	-1	-1	-1	-1	-1	1.28017	(1, 1.5]
AKS1	AKP1	AKS	AKP	AKS1AKP1	Glu+Sorbitol	-10	-0.0413735	0.0982963	0.0284614	-0.0413735	0.0982963	0.94878	(0.5,1]
AKS1	AKP1	AKS	AKP	AKS1AKP1	Glucose	-0.0214573	-0.128884	-0.0557565	-0.0923201	-0.128884	-0.0557565	0.94878	(0.5,1]
AKS1	AKP1	AKS	AKP	AKS1AKP1	Glycerol	-10	-1	-0.109008	-0.554504	-1	-0.109008	0.94878	(0.5,1]
AKS1	ALG1	AKS	ALG	AKS1ALG1	Glu+Sorbitol	-10	-0.0413735	0.0868454	0.0227359	-0.0413735	0.0868454	0.596631	(0.5,1]
AKS1	ALG1	AKS	ALG	AKS1ALG1	Glucose	-10	-0.128884	-0.141619	-0.135251	-0.141619	-0.128884	0.596631	(0.5,1]
AKS1	ALG1	AKS	ALG	AKS1ALG1	Glycerol	-10	-1	-0.0464457	-0.523223	-1	-0.0464457	0.596631	(0.5,1]
AKS1	ANG1	AKS	ANG	AKS1ANG1	Glu+Sorbitol	-10	-0.0413735	0.0628167	0.0107216	-0.0413735	0.0628167	0.926274	(0.5,1]
AKS1	ANG1	AKS	ANG	AKS1ANG1	Glucose	-10	-0.128884	0.0663533	-0.0312652	-0.128884	0.0663533	0.926274	(0.5,1]
AKS1	ANG1	AKS	ANG	AKS1ANG1	Glycerol	-10	-1	-1	-1	-1	-1	0.926274	(0.5,1]
AKS1	AIM1	AKS	AIM	AKS1AIM1	Glu+Sorbitol	-10	-0.0413735	-1	-0.520687	-1	-0.0413735	0.99895	(0.5,1]
AKS1	AIM1	AKS	AIM	AKS1AIM1	Glucose	-10	-0.128884	-10	-5.06444	-10	-0.128884	0.99895	(0.5,1]
AKS1	AIM1	AKS	AIM	AKS1AIM1	Glycerol	-10	-1	-10	-5.5	-10	-1	0.99895	(0.5,1]
AKS1	AKV1	AKS	AKV	AKS1AKV1	Glu+Sorbitol	0.000264657	-0.0413735	0.0943177	0.0264721	-0.0413735	0.0943177	0.948591	(0.5,1]
AKS1	AKV1	AKS	AKV	AKS1AKV1	Glucose	0.0132102	-0.128884	-0.033945	-0.0814144	-0.128884	-0.033945	0.948591	(0.5,1]
AKS1	AKV1	AKS	AKV	AKS1AKV1	Glycerol	-10	-1	-0.0735332	-0.536767	-1	-0.0735332	0.948591	(0.5,1]
AKS1	BBI1	AKS	BBI	AKS1BBI1	Glu+Sorbitol	-10	-0.0413735	0.242166	0.100396	-0.0413735	0.242166	0.950125	(0.5,1]
AKS1	BBI1	AKS	BBI	AKS1BBI1	Glucose	-10	-0.128884	0.0118567	-0.0585135	-0.128884	0.0118567	0.950125	(0.5,1]
AKS1	BBI1	AKS	BBI	AKS1BBI1	Glycerol	-10	-1	-0.0628554	-0.531428	-1	-0.0628554	0.950125	(0.5,1]
AKS1	BAK1	AKS	BAK	AKS1BAK1	Glu+Sorbitol	-0.0403223	-0.0413735	0.0545167	0.00657159	-0.0413735	0.0545167	1.30334	(1, 1.5]
AKS1	BAK1	AKS	BAK	AKS1BAK1	Glucose	0.0391915	-0.128884	0.0639478	-0.0324679	-0.128884	0.0639478	1.30334	(1, 1.5]
AKS1	BAK1	AKS	BAK	AKS1BAK1	Glycerol	-10	-1	-0.00177197	-0.500886	-1	-0.00177197	1.30334	(1, 1.5]
AKS1	BEH1	AKS	BEH	AKS1BEH1	Glu+Sorbitol	-10	-0.0413735	0.114205	0.0364156	-0.0413735	0.114205	1.11783	(1, 1.5]
AKS1	BEH1	AKS	BEH	AKS1BEH1	Glucose	-10	-0.128884	-0.0314472	-0.0801655	-0.128884	-0.0314472	1.11783	(1, 1.5]
AKS1	BEH1	AKS	BEH	AKS1BEH1	Glycerol	-10	-1	-1	-1	-1	-1	1.11783	(1, 1.5]
AKS1	BLA1	AKS	BLA	AKS1BLA1	Glu+Sorbitol	-1	-0.0413735	-10	-5.02069	-10	-0.0413735	0.951533	(0.5,1]
AKS1	BLA1	AKS	BLA	AKS1BLA1	Glucose	-10	-0.128884	-10	-5.06444	-10	-0.128884	0.951533	(0.5,1]
AKS1	BLA1	AKS	BLA	AKS1BLA1	Glycerol	-10	-1	-10	-5.5	-10	-1	0.951533	(0.5,1]
AKS1	BHM1	AKS	BHM	AKS1BHM1	Glu+Sorbitol	-10	-0.0413735	-1	-0.520687	-1	-0.0413735	0.954899	(0.5,1]
AKS1	BHM1	AKS	BHM	AKS1BHM1	Glucose	-10	-0.128884	-10	-5.06444	-10	-0.128884	0.954899	(0.5,1]
AKS1	BHM1	AKS	BHM	AKS1BHM1	Glycerol	-10	-1	-1	-1	-1	-1	0.954899	(0.5,1]
AKS1	BHN1	AKS	BHN	AKS1BHN1	Glu+Sorbitol	-0.0626857	-0.0413735	0.00750642	-0.0169336	-0.0413735	0.00750642	0.953875	(0.5,1]
AKS1	BHN1	AKS	BHN	AKS1BHN1	Glucose	-10	-0.128884	-1	-0.564442	-1	-0.128884	0.953875	(0.5,1]
AKS1	BHN1	AKS	BHN	AKS1BHN1	Glycerol	-10	-1	-1	-1	-1	-1	0.953875	(0.5,1]
AKS1	BHB1	AKS	BHB	AKS1BHB1	Glu+Sorbitol	-1	-0.0413735	-1	-0.520687	-1	-0.0413735	0.984209	(0.5,1]
AKS1	BHB1	AKS	BHB	AKS1BHB1	Glucose	-0.103133	-0.128884	-10	-5.06444	-10	-0.128884	0.984209	(0.5,1]
AKS1	BHB1	AKS	BHB	AKS1BHB1	Glycerol	-10	-1	-10	-5.5	-10	-1	0.984209	(0.5,1]
AKS1	BLE1	AKS	BLE	AKS1BLE1	Glu+Sorbitol	-1	-0.0413735	-1	-0.520687	-1	-0.0413735	0.955482	(0.5,1]
AKS1	BLE1	AKS	BLE	AKS1BLE1	Glucose	0.0114058	-0.128884	-0.0748489	-0.101866	-0.128884	-0.0748489	0.955482	(0.5,1]
AKS1	BLE1	AKS	BLE	AKS1BLE1	Glycerol	-1	-1	-0.044381	-0.52219	-1	-0.044381	0.955482	(0.5,1]
AKS1	BHF1	AKS	BHF	AKS1BHF1	Glu+Sorbitol	-10	-0.0413735	0.0591106	0.00886853	-0.0413735	0.0591106	0.944058	(0.5,1]
AKS1	BHF1	AKS	BHF	AKS1BHF1	Glucose	-0.0218658	-0.128884	0.0612509	-0.0338164	-0.128884	0.0612509	0.944058	(0.5,1]
AKS1	BHF1	AKS	BHF	AKS1BHF1	Glycerol	-1	-1	0.0945635	-0.452718	-1	0.0945635	0.944058	(0.5,1]
AKS1	BKR1	AKS	BKR	AKS1BKR1	Glu+Sorbitol	-0.0129175	-0.0413735	-1	-0.520687	-1	-0.0413735	0.956975	(0.5,1]
AKS1	BKR1	AKS	BKR	AKS1BKR1	Glucose	-10	-0.128884	-0.013402	-0.0711429	-0.128884	-0.013402	0.956975	(0.5,1]
AKS1	BKR1	AKS	BKR	AKS1BKR1	Glycerol	-10	-1	-1	-1	-1	-1	0.956975	(0.5,1]
AKS1	BLL1	AKS	BLL	AKS1BLL1	Glu+Sorbitol	-0.0574704	-0.0413735	-1	-0.520687	-1	-0.0413735	0.956111	(0.5,1]
AKS1	BLL1	AKS	BLL	AKS1BLL1	Glucose	-10	-0.128884	-1	-0.564442	-1	-0.128884	0.956111	(0.5,1]
AKS1	BLL1	AKS	BLL	AKS1BLL1	Glycerol	-0.0469165	-1	0.120353	-0.439823	-1	0.120353	0.956111	(0.5,1]
AKS1	BNI1	AKS	BNI	AKS1BNI1	Glu+Sorbitol	-10	-0.0413735	-10	-0.0413735	-0.0413735	-0.0413735	0.95803	(0.5,1]
AKS1	BNI1	AKS	BNI	AKS1BNI1	Glucose	-10	-0.128884	-10	-0.128884	-0.128884	-0.128884	0.95803	(0.5,1]
AKS1	BNI1	AKS	BNI	AKS1BNI1	Glycerol	-10	-1	-10	-1	-1	-1	0.95803	(0.5,1]
AKS1	BQG1	AKS	BQG	AKS1BQG1	Glu+Sorbitol	0.0184225	-0.0413735	0.133013	0.0458197	-0.0413735	0.133013	0.954279	(0.5,1]
AKS1	BQG1	AKS	BQG	AKS1BQG1	Glucose	0.0355784	-0.128884	-0.0571925	-0.0930381	-0.128884	-0.0571925	0.954279	(0.5,1]
AKS1	BQG1	AKS	BQG	AKS1BQG1	Glycerol	-0.0457363	-1	0.0537228	-0.473139	-1	0.0537228	0.954279	(0.5,1]
AKS1	BNK1	AKS	BNK	AKS1BNK1	Glu+Sorbitol	-0.113158	-0.0413735	-1	-0.520687	-1	-0.0413735	0.954418	(0.5,1]
AKS1	BNK1	AKS	BNK	AKS1BNK1	Glucose	-0.0183274	-0.128884	-0.0796816	-0.104283	-0.128884	-0.0796816	0.954418	(0.5,1]
AKS1	BNK1	AKS	BNK	AKS1BNK1	Glycerol	-0.0732202	-1	0.115878	-0.442061	-1	0.115878	0.954418	(0.5,1]
AKS1	BPQ1	AKS	BPQ	AKS1BPQ1	Glu+Sorbitol	-0.0276247	-0.0413735	0.196057	0.0773416	-0.0413735	0.196057	0.950393	(0.5,1]
AKS1	BPQ1	AKS	BPQ	AKS1BPQ1	Glucose	-0.0121428	-0.128884	0.00714221	-0.0608708	-0.128884	0.00714221	0.950393	(0.5,1]
AKS1	BPQ1	AKS	BPQ	AKS1BPQ1	Glycerol	-0.084606	-1	0.0632255	-0.468387	-1	0.0632255	0.950393	(0.5,1]
AKS1	BQH1	AKS	BQH	AKS1BQH1	Glu+Sorbitol	-1	-0.0413735	0.00347705	-0.0189483	-0.0413735	0.00347705	0.957599	(0.5,1]
AKS1	BQH1	AKS	BQH	AKS1BQH1	Glucose	-0.14541	-0.128884	0.0201877	-0.054348	-0.128884	0.0201877	0.957599	(0.5,1]
AKS1	BQH1	AKS	BQH	AKS1BQH1	Glycerol	-10	-1	-1	-1	-1	-1	0.957599	(0.5,1]
AKS1	BRA1	AKS	BRA	AKS1BRA1	Glu+Sorbitol	-0.0778766	-0.0413735	0.0670496	0.012838	-0.0413735	0.0670496	0.956634	(0.5,1]
AKS1	BRA1	AKS	BRA	AKS1BRA1	Glucose	0.0315811	-0.128884	-0.0988197	-0.113852	-0.128884	-0.0988197	0.956634	(0.5,1]
AKS1	BRA1	AKS	BRA	AKS1BRA1	Glycerol	-10	-1	-1	-1	-1	-1	0.956634	(0.5,1]
AKS1	BLN1	AKS	BLN	AKS1BLN1	Glu+Sorbitol	-10	-0.0413735	-10	-0.0413735	-0.0413735	-0.0413735	0.954816	(0.5,1]
AKS1	BLN1	AKS	BLN	AKS1BLN1	Glucose	-10	-0.128884	-10	-0.128884	-0.128884	-0.128884	0.954816	(0.5,1]
AKS1	BLN1	AKS	BLN	AKS1BLN1	Glycerol	-10	-1	-10	-1	-1	-1	0.954816	(0.5,1]
AKS1	BQI1	AKS	BQI	AKS1BQI1	Glu+Sorbitol	-0.00222424	-0.0413735	0.143956	0.0512912	-0.0413735	0.143956	0.955139	(0.5,1]
AKS1	BQI1	AKS	BQI	AKS1BQI1	Glucose	0.00289888	-0.128884	-0.108288	-0.118586	-0.128884	-0.108288	0.955139	(0.5,1]
AKS1	BQI1	AKS	BQI	AKS1BQI1	Glycerol	-10	-1	-0.01173	-0.505865	-1	-0.01173	0.955139	(0.5,1]
AKS1	BRB1	AKS	BRB	AKS1BRB1	Glu+Sorbitol	-0.078284	-0.0413735	0.109832	0.0342294	-0.0413735	0.109832	0.96181	(0.5,1]
AKS1	BRB1	AKS	BRB	AKS1BRB1	Glucose	-0.00544064	-0.128884	0.0350566	-0.0469136	-0.128884	0.0350566	0.96181	(0.5,1]
AKS1	BRB1	AKS	BRB	AKS1BRB1	Glycerol	-0.0552255	-1	0.000627839	-0.499686	-1	0.000627839	0.96181	(0.5,1]
AKS1	BLP1	AKS	BLP	AKS1BLP1	Glu+Sorbitol	-0.282463	-0.0413735	0.159343	0.0589849	-0.0413735	0.159343	0.955244	(0.5,1]
AKS1	BLP1	AKS	BLP	AKS1BLP1	Glucose	-10	-0.128884	0.0477277	-0.040578	-0.128884	0.0477277	0.955244	(0.5,1]
AKS1	BLP1	AKS	BLP	AKS1BLP1	Glycerol	0.0199621	-1	0.0191829	-0.490409	-1	0.0191829	0.955244	(0.5,1]
AKS1	BRC1	AKS	BRC	AKS1BRC1	Glu+Sorbitol	-1	-0.0413735	0.107766	0.0331961	-0.0413735	0.107766	0.947301	(0.5,1]
AKS1	BRC1	AKS	BRC	AKS1BRC1	Glucose	-0.0768537	-0.128884	-0.0843597	-0.106622	-0.128884	-0.0843597	0.947301	(0.5,1]
AKS1	BRC1	AKS	BRC	AKS1BRC1	Glycerol	-10	-1	-0.0845599	-0.54228	-1	-0.0845599	0.947301	(0.5,1]
AKS1	BPT1	AKS	BPT	AKS1BPT1	Glu+Sorbitol	-0.0709843	-0.0413735	0.0437225	0.00117445	-0.0413735	0.0437225	0.950775	(0.5,1]
AKS1	BPT1	AKS	BPT	AKS1BPT1	Glucose	-0.0560655	-0.128884	-0.0226414	-0.0757626	-0.128884	-0.0226414	0.950775	(0.5,1]
AKS1	BPT1	AKS	BPT	AKS1BPT1	Glycerol	-10	-1	0.0527905	-0.473605	-1	0.0527905	0.950775	(0.5,1]
AKS1	BRD1	AKS	BRD	AKS1BRD1	Glu+Sorbitol	-10	-0.0413735	0.0462453	0.00243587	-0.0413735	0.0462453	0.949134	(0.5,1]
AKS1	BRD1	AKS	BRD	AKS1BRD1	Glucose	0.0204327	-0.128884	-0.0248454	-0.0768646	-0.128884	-0.0248454	0.949134	(0.5,1]
AKS1	BRD1	AKS	BRD	AKS1BRD1	Glycerol	-1	-1	0.10436	-0.44782	-1	0.10436	0.949134	(0.5,1]
AKS1	BMK1	AKS	BMK	AKS1BMK1	Glu+Sorbitol	-0.0150581	-0.0413735	0.10245	0.0305383	-0.0413735	0.10245	0.952322	(0.5,1]
AKS1	BMK1	AKS	BMK	AKS1BMK1	Glucose	-0.0311201	-0.128884	0.0206207	-0.0541315	-0.128884	0.0206207	0.952322	(0.5,1]
AKS1	BMK1	AKS	BMK	AKS1BMK1	Glycerol	-10	-1	0.0727937	-0.463603	-1	0.0727937	0.952322	(0.5,1]
AKS1	BQP1	AKS	BQP	AKS1BQP1	Glu+Sorbitol	-0.0572896	-0.0413735	0.108223	0.0334249	-0.0413735	0.108223	0.952448	(0.5,1]
AKS1	BQP1	AKS	BQP	AKS1BQP1	Glucose	-0.0826761	-0.128884	0.0119541	-0.0584648	-0.128884	0.0119541	0.952448	(0.5,1]
AKS1	BQP1	AKS	BQP	AKS1BQP1	Glycerol	-10	-1	-0.0301991	-0.5151	-1	-0.0301991	0.952448	(0.5,1]
AKS1	BLV1	AKS	BLV	AKS1BLV1	Glu+Sorbitol	0.0202691	-0.0413735	0.148788	0.0537072	-0.0413735	0.148788	0.954226	(0.5,1]
AKS1	BLV1	AKS	BLV	AKS1BLV1	Glucose	-0.132949	-0.128884	-0.0681483	-0.098516	-0.128884	-0.0681483	0.954226	(0.5,1]
AKS1	BLV1	AKS	BLV	AKS1BLV1	Glycerol	0.0230867	-1	0.0838921	-0.458054	-1	0.0838921	0.954226	(0.5,1]
AKS1	BQQ1	AKS	BQQ	AKS1BQQ1	Glu+Sorbitol	-0.0575373	-0.0413735	0.0432009	0.000913669	-0.0413735	0.0432009	0.95358	(0.5,1]
AKS1	BQQ1	AKS	BQQ	AKS1BQQ1	Glucose	-10	-0.128884	0.0291802	-0.0498518	-0.128884	0.0291802	0.95358	(0.5,1]
AKS1	BQQ1	AKS	BQQ	AKS1BQQ1	Glycerol	-10	-1	0.0824425	-0.458779	-1	0.0824425	0.95358	(0.5,1]
AKS1	BMA1	AKS	BMA	AKS1BMA1	Glu+Sorbitol	-1	-0.0413735	0.0267219	-0.00732581	-0.0413735	0.0267219	1.3215	(1, 1.5]
AKS1	BMA1	AKS	BMA	AKS1BMA1	Glucose	-1	-0.128884	0.0277247	-0.0505795	-0.128884	0.0277247	1.3215	(1, 1.5]
AKS1	BMA1	AKS	BMA	AKS1BMA1	Glycerol	-10	-1	0.0885346	-0.455733	-1	0.0885346	1.3215	(1, 1.5]
AKS1	BQR1	AKS	BQR	AKS1BQR1	Glu+Sorbitol	-0.0999875	-0.0413735	0.0524282	0.00552734	-0.0413735	0.0524282	0.950601	(0.5,1]
AKS1	BQR1	AKS	BQR	AKS1BQR1	Glucose	0.0511136	-0.128884	-0.0545715	-0.0917276	-0.128884	-0.0545715	0.950601	(0.5,1]
AKS1	BQR1	AKS	BQR	AKS1BQR1	Glycerol	-1	-1	0.0588489	-0.470576	-1	0.0588489	0.950601	(0.5,1]
AKS1	CAD1	AKS	CAD	AKS1CAD1	Glu+Sorbitol	-10	-0.0413735	0.0934632	0.0260448	-0.0413735	0.0934632	1.02684	(0.5,1]
AKS1	CAD1	AKS	CAD	AKS1CAD1	Glucose	-10	-0.128884	-0.0194773	-0.0741805	-0.128884	-0.0194773	1.02684	(0.5,1]
AKS1	CAD1	AKS	CAD	AKS1CAD1	Glycerol	-10	-1	-10	-5.5	-10	-1	1.02684	(0.5,1]
AKS1	BSB1	AKS	BSB	AKS1BSB1	Glu+Sorbitol	-10	-0.0413735	-10	-5.02069	-10	-0.0413735	0.946489	(0.5,1]
AKS1	BSB1	AKS	BSB	AKS1BSB1	Glucose	-10	-0.128884	-10	-0.128884	-0.128884	-0.128884	0.946489	(0.5,1]
AKS1	BSB1	AKS	BSB	AKS1BSB1	Glycerol	-10	-1	-10	-1	-1	-1	0.946489	(0.5,1]
AKS1	BTH1	AKS	BTH	AKS1BTH1	Glu+Sorbitol	-10	-0.0413735	0.0555657	0.00709609	-0.0413735	0.0555657	0.946711	(0.5,1]
AKS1	BTH1	AKS	BTH	AKS1BTH1	Glucose	-10	-0.128884	-0.01391	-0.0713969	-0.128884	-0.01391	0.946711	(0.5,1]
AKS1	BTH1	AKS	BTH	AKS1BTH1	Glycerol	-10	-1	-1	-1	-1	-1	0.946711	(0.5,1]
AKS1	AHP1	AKS	AHP	AKS1AHP1	Glu+Sorbitol	-0.230913	-0.0413735	-1	-0.520687	-1	-0.0413735	1.03342	(0.5,1]
AKS1	AHP1	AKS	AHP	AKS1AHP1	Glucose	-10	-0.128884	-1	-0.564442	-1	-0.128884	1.03342	(0.5,1]
AKS1	AHP1	AKS	AHP	AKS1AHP1	Glycerol	-10	-1	0.0888156	-0.455592	-1	0.0888156	1.03342	(0.5,1]
AKS1	CQD1	AKS	CQD	AKS1CQD1	Glu+Sorbitol	-10	-0.0413735	0.0454048	0.00201565	-0.0413735	0.0454048	1.00344	(0.5,1]
AKS1	CQD1	AKS	CQD	AKS1CQD1	Glucose	-1	-0.128884	0.0106465	-0.0591186	-0.128884	0.0106465	1.00344	(0.5,1]
AKS1	CQD1	AKS	CQD	AKS1CQD1	Glycerol	-10	-1	-10	-5.5	-10	-1	1.00344	(0.5,1]
AKS1	APV1	AKS	APV	AKS1APV1	Glu+Sorbitol	-0.0517376	-0.0413735	0.0394829	-0.000945334	-0.0413735	0.0394829	0.950366	(0.5,1]
AKS1	APV1	AKS	APV	AKS1APV1	Glucose	-10	-0.128884	-0.0613302	-0.095107	-0.128884	-0.0613302	0.950366	(0.5,1]
AKS1	APV1	AKS	APV	AKS1APV1	Glycerol	-0.0280566	-1	0.176787	-0.411606	-1	0.176787	0.950366	(0.5,1]
AKS1	AST1	AKS	AST	AKS1AST1	Glu+Sorbitol	-10	-0.0413735	-1	-0.520687	-1	-0.0413735	0.916644	(0.5,1]
AKS1	AST1	AKS	AST	AKS1AST1	Glucose	-0.0562502	-0.128884	0.0143308	-0.0572765	-0.128884	0.0143308	0.916644	(0.5,1]
AKS1	AST1	AKS	AST	AKS1AST1	Glycerol	-10	-1	-1	-1	-1	-1	0.916644	(0.5,1]
AKS1	CCV1	AKS	CCV	AKS1CCV1	Glu+Sorbitol	-0.0433049	-0.0413735	0.107101	0.0328636	-0.0413735	0.107101	1.11708	(1, 1.5]
AKS1	CCV1	AKS	CCV	AKS1CCV1	Glucose	-10	-0.128884	0.044604	-0.0421399	-0.128884	0.044604	1.11708	(1, 1.5]
AKS1	CCV1	AKS	CCV	AKS1CCV1	Glycerol	-10	-1	-1	-1	-1	-1	1.11708	(1, 1.5]
AKS1	YAR1	AKS	YAR	AKS1YAR1	Glu+Sorbitol	-1	-0.0413735	-1	-0.520687	-1	-0.0413735	0.976454	(0.5,1]
AKS1	YAR1	AKS	YAR	AKS1YAR1	Glucose	-0.0478589	-0.128884	-0.0705407	-0.0997122	-0.128884	-0.0705407	0.976454	(0.5,1]
AKS1	YAR1	AKS	YAR	AKS1YAR1	Glycerol	-10	-1	-1	-1	-1	-1	0.976454	(0.5,1]
AKS1	YBU1	AKS	YBU	AKS1YBU1	Glu+Sorbitol	-10	-0.0413735	-1	-0.520687	-1	-0.0413735	1.13035	(1, 1.5]
AKS1	YBU1	AKS	YBU	AKS1YBU1	Glucose	-10	-0.128884	-10	-5.06444	-10	-0.128884	1.13035	(1, 1.5]
AKS1	YBU1	AKS	YBU	AKS1YBU1	Glycerol	-10	-1	-1	-1	-1	-1	1.13035	(1, 1.5]
AKG1	AKB1	AKG	AKB	AKG1AKB1	Glu+Sorbitol	-10	-10	0.139707	-4.93015	-10	0.139707	0.42769	(0.05,0.5]
AKG1	AKB1	AKG	AKB	AKG1AKB1	Glucose	-10	-1	-0.0154866	-0.507743	-1	-0.0154866	0.42769	(0.05,0.5]
AKG1	AKB1	AKG	AKB	AKG1AKB1	Glycerol	-10	-10	-1	-5.5	-10	-1	0.42769	(0.05,0.5]
AKG1	AKP1	AKG	AKP	AKG1AKP1	Glu+Sorbitol	-10	-10	0.0982963	-4.95085	-10	0.0982963	1.46567	(1, 1.5]
AKG1	AKP1	AKG	AKP	AKG1AKP1	Glucose	0.0500866	-1	-0.0557565	-0.527878	-1	-0.0557565	1.46567	(1, 1.5]
AKG1	AKP1	AKG	AKP	AKG1AKP1	Glycerol	-10	-10	-0.109008	-5.0545	-10	-0.109008	1.46567	(1, 1.5]
AKG1	ALG1	AKG	ALG	AKG1ALG1	Glu+Sorbitol	-10	-10	0.0868454	-4.95658	-10	0.0868454	1.30685	(1, 1.5]
AKG1	ALG1	AKG	ALG	AKG1ALG1	Glucose	-10	-1	-0.141619	-0.570809	-1	-0.141619	1.30685	(1, 1.5]
AKG1	ALG1	AKG	ALG	AKG1ALG1	Glycerol	-10	-10	-0.0464457	-5.02322	-10	-0.0464457	1.30685	(1, 1.5]
AKG1	ANG1	AKG	ANG	AKG1ANG1	Glu+Sorbitol	-10	-10	0.0628167	-4.96859	-10	0.0628167	1.11929	(1, 1.5]
AKG1	ANG1	AKG	ANG	AKG1ANG1	Glucose	-10	-1	0.0663533	-0.466823	-1	0.0663533	1.11929	(1, 1.5]
AKG1	ANG1	AKG	ANG	AKG1ANG1	Glycerol	-10	-10	-1	-5.5	-10	-1	1.11929	(1, 1.5]
AKG1	AIM1	AKG	AIM	AKG1AIM1	Glu+Sorbitol	-10	-10	-1	-5.5	-10	-1	1.48823	(1, 1.5]
AKG1	AIM1	AKG	AIM	AKG1AIM1	Glucose	-10	-1	-10	-5.5	-10	-1	1.48823	(1, 1.5]
AKG1	AIM1	AKG	AIM	AKG1AIM1	Glycerol	-10	-10	-10	-10	-10	-10	1.48823	(1, 1.5]
AKG1	AKV1	AKG	AKV	AKG1AKV1	Glu+Sorbitol	-10	-10	0.0943177	-4.95284	-10	0.0943177	1.46551	(1, 1.5]
AKG1	AKV1	AKG	AKV	AKG1AKV1	Glucose	-10	-1	-0.033945	-0.516972	-1	-0.033945	1.46551	(1, 1.5]
AKG1	AKV1	AKG	AKV	AKG1AKV1	Glycerol	-0.0118456	-10	-0.0735332	-5.03677	-10	-0.0735332	1.46551	(1, 1.5]
AKG1	BBI1	AKG	BBI	AKG1BBI1	Glu+Sorbitol	-10	-10	0.242166	-4.87892	-10	0.242166	1.4645	(1, 1.5]
AKG1	BBI1	AKG	BBI	AKG1BBI1	Glucose	-10	-1	0.0118567	-0.494072	-1	0.0118567	1.4645	(1, 1.5]
AKG1	BBI1	AKG	BBI	AKG1BBI1	Glycerol	-10	-10	-0.0628554	-5.03143	-10	-0.0628554	1.4645	(1, 1.5]
AKG1	BAK1	AKG	BAK	AKG1BAK1	Glu+Sorbitol	-10	-10	0.0545167	-4.97274	-10	0.0545167	1.4523	(1, 1.5]
AKG1	BAK1	AKG	BAK	AKG1BAK1	Glucose	-10	-1	0.0639478	-0.468026	-1	0.0639478	1.4523	(1, 1.5]
AKG1	BAK1	AKG	BAK	AKG1BAK1	Glycerol	0.148598	-10	-0.00177197	-5.00089	-10	-0.00177197	1.4523	(1, 1.5]
AKG1	BEH1	AKG	BEH	AKG1BEH1	Glu+Sorbitol	-10	-10	0.114205	-4.9429	-10	0.114205	1.26314	(1, 1.5]
AKG1	BEH1	AKG	BEH	AKG1BEH1	Glucose	-10	-1	-0.0314472	-0.515724	-1	-0.0314472	1.26314	(1, 1.5]
AKG1	BEH1	AKG	BEH	AKG1BEH1	Glycerol	-10	-10	-1	-5.5	-10	-1	1.26314	(1, 1.5]
AKG1	BLA1	AKG	BLA	AKG1BLA1	Glu+Sorbitol	-10	-10	-10	-10	-10	-10	1.46808	(1, 1.5]
AKG1	BLA1	AKG	BLA	AKG1BLA1	Glucose	-10	-1	-10	-5.5	-10	-1	1.46808	(1, 1.5]
AKG1	BLA1	AKG	BLA	AKG1BLA1	Glycerol	-0.0909021	-10	-10	-10	-10	-10	1.46808	(1, 1.5]
AKG1	BHM1	AKG	BHM	AKG1BHM1	Glu+Sorbitol	-10	-10	-1	-5.5	-10	-1	1.45204	(1, 1.5]
AKG1	BHM1	AKG	BHM	AKG1BHM1	Glucose	-10	-1	-10	-5.5	-10	-1	1.45204	(1, 1.5]
AKG1	BHM1	AKG	BHM	AKG1BHM1	Glycerol	-10	-10	-1	-5.5	-10	-1	1.45204	(1, 1.5]
AKG1	BHN1	AKG	BHN	AKG1BHN1	Glu+Sorbitol	-10	-10	0.00750642	-4.99625	-10	0.00750642	1.45973	(1, 1.5]
AKG1	BHN1	AKG	BHN	AKG1BHN1	Glucose	0.0562041	-1	-1	-1	-1	-1	1.45973	(1, 1.5]
AKG1	BHN1	AKG	BHN	AKG1BHN1	Glycerol	-10	-10	-1	-5.5	-10	-1	1.45973	(1, 1.5]
AKG1	BHB1	AKG	BHB	AKG1BHB1	Glu+Sorbitol	-10	-10	-1	-5.5	-10	-1	1.47294	(1, 1.5]
AKG1	BHB1	AKG	BHB	AKG1BHB1	Glucose	-10	-1	-10	-5.5	-10	-1	1.47294	(1, 1.5]
AKG1	BHB1	AKG	BHB	AKG1BHB1	Glycerol	-10	-10	-10	-10	-10	-10	1.47294	(1, 1.5]
AKG1	BLE1	AKG	BLE	AKG1BLE1	Glu+Sorbitol	-0.0177243	-10	-1	-5.5	-10	-1	1.46976	(1, 1.5]
AKG1	BLE1	AKG	BLE	AKG1BLE1	Glucose	0.017706	-1	-0.0748489	-0.537424	-1	-0.0748489	1.46976	(1, 1.5]
AKG1	BLE1	AKG	BLE	AKG1BLE1	Glycerol	-0.0515094	-10	-0.044381	-5.02219	-10	-0.044381	1.46976	(1, 1.5]
AKG1	BHF1	AKG	BHF	AKG1BHF1	Glu+Sorbitol	-10	-10	0.0591106	-4.97044	-10	0.0591106	1.45849	(1, 1.5]
AKG1	BHF1	AKG	BHF	AKG1BHF1	Glucose	-10	-1	0.0612509	-0.469375	-1	0.0612509	1.45849	(1, 1.5]
AKG1	BHF1	AKG	BHF	AKG1BHF1	Glycerol	0.0559669	-10	0.0945635	-4.95272	-10	0.0945635	1.45849	(1, 1.5]
AKG1	BKR1	AKG	BKR	AKG1BKR1	Glu+Sorbitol	-10	-10	-1	-5.5	-10	-1	1.46893	(1, 1.5]
AKG1	BKR1	AKG	BKR	AKG1BKR1	Glucose	-10	-1	-0.013402	-0.506701	-1	-0.013402	1.46893	(1, 1.5]
AKG1	BKR1	AKG	BKR	AKG1BKR1	Glycerol	-10	-10	-1	-5.5	-10	-1	1.46893	(1, 1.5]
AKG1	BLL1	AKG	BLL	AKG1BLL1	Glu+Sorbitol	-10	-10	-1	-5.5	-10	-1	1.47264	(1, 1.5]
AKG1	BLL1	AKG	BLL	AKG1BLL1	Glucose	-1	-1	-1	-1	-1	-1	1.47264	(1, 1.5]
AKG1	BLL1	AKG	BLL	AKG1BLL1	Glycerol	0.0915168	-10	0.120353	-4.93982	-10	0.120353	1.47264	(1, 1.5]
AKG1	BNI1	AKG	BNI	AKG1BNI1	Glu+Sorbitol	-10	-10	-10	-10	-10	-10	1.4693	(1, 1.5]
AKG1	BNI1	AKG	BNI	AKG1BNI1	Glucose	-10	-1	-10	-1	-1	-1	1.4693	(1, 1.5]
AKG1	BNI1	AKG	BNI	AKG1BNI1	Glycerol	-10	-10	-10	-10	-10	-10	1.4693	(1, 1.5]
AKG1	BQG1	AKG	BQG	AKG1BQG1	Glu+Sorbitol	-10	-10	0.133013	-4.93349	-10	0.133013	1.46974	(1, 1.5]
AKG1	BQG1	AKG	BQG	AKG1BQG1	Glucose	-10	-1	-0.0571925	-0.528596	-1	-0.0571925	1.46974	(1, 1.5]
AKG1	BQG1	AKG	BQG	AKG1BQG1	Glycerol	0.0502494	-10	0.0537228	-4.97314	-10	0.0537228	1.46974	(1, 1.5]
AKG1	BNK1	AKG	BNK	AKG1BNK1	Glu+Sorbitol	-10	-10	-1	-5.5	-10	-1	1.46824	(1, 1.5]
AKG1	BNK1	AKG	BNK	AKG1BNK1	Glucose	0.0018461	-1	-0.0796816	-0.539841	-1	-0.0796816	1.46824	(1, 1.5]
AKG1	BNK1	AKG	BNK	AKG1BNK1	Glycerol	0.0581118	-10	0.115878	-4.94206	-10	0.115878	1.46824	(1, 1.5]
AKG1	BPQ1	AKG	BPQ	AKG1BPQ1	Glu+Sorbitol	0.0417627	-10	0.196057	-4.90197	-10	0.196057	1.45706	(1, 1.5]
AKG1	BPQ1	AKG	BPQ	AKG1BPQ1	Glucose	-0.000820375	-1	0.00714221	-0.496429	-1	0.00714221	1.45706	(1, 1.5]
AKG1	BPQ1	AKG	BPQ	AKG1BPQ1	Glycerol	-0.0080107	-10	0.0632255	-4.96839	-10	0.0632255	1.45706	(1, 1.5]
AKG1	BQH1	AKG	BQH	AKG1BQH1	Glu+Sorbitol	-10	-10	0.00347705	-4.99826	-10	0.00347705	1.47297	(1, 1.5]
AKG1	BQH1	AKG	BQH	AKG1BQH1	Glucose	-10	-1	0.0201877	-0.489906	-1	0.0201877	1.47297	(1, 1.5]
AKG1	BQH1	AKG	BQH	AKG1BQH1	Glycerol	-10	-10	-1	-5.5	-10	-1	1.47297	(1, 1.5]
AKG1	BRA1	AKG	BRA	AKG1BRA1	Glu+Sorbitol	-10	-10	0.0670496	-4.96648	-10	0.0670496	1.4626	(1, 1.5]
AKG1	BRA1	AKG	BRA	AKG1BRA1	Glucose	-10	-1	-0.0988197	-0.54941	-1	-0.0988197	1.4626	(1, 1.5]
AKG1	BRA1	AKG	BRA	AKG1BRA1	Glycerol	-10	-10	-1	-5.5	-10	-1	1.4626	(1, 1.5]
AKG1	BLN1	AKG	BLN	AKG1BLN1	Glu+Sorbitol	-10	-10	-10	-10	-10	-10	1.47162	(1, 1.5]
AKG1	BLN1	AKG	BLN	AKG1BLN1	Glucose	-10	-1	-10	-1	-1	-1	1.47162	(1, 1.5]
AKG1	BLN1	AKG	BLN	AKG1BLN1	Glycerol	-10	-10	-10	-10	-10	-10	1.47162	(1, 1.5]
AKG1	BQI1	AKG	BQI	AKG1BQI1	Glu+Sorbitol	-10	-10	0.143956	-4.92802	-10	0.143956	1.46878	(1, 1.5]
AKG1	BQI1	AKG	BQI	AKG1BQI1	Glucose	-10	-1	-0.108288	-0.554144	-1	-0.108288	1.46878	(1, 1.5]
AKG1	BQI1	AKG	BQI	AKG1BQI1	Glycerol	0.11018	-10	-0.01173	-5.00587	-10	-0.01173	1.46878	(1, 1.5]
AKG1	BRB1	AKG	BRB	AKG1BRB1	Glu+Sorbitol	-10	-10	0.109832	-4.94508	-10	0.109832	1.45343	(1, 1.5]
AKG1	BRB1	AKG	BRB	AKG1BRB1	Glucose	0.0140974	-1	0.0350566	-0.482472	-1	0.0350566	1.45343	(1, 1.5]
AKG1	BRB1	AKG	BRB	AKG1BRB1	Glycerol	0.0205089	-10	0.000627839	-4.99969	-10	0.000627839	1.45343	(1, 1.5]
AKG1	BLP1	AKG	BLP	AKG1BLP1	Glu+Sorbitol	-0.262371	-10	0.159343	-4.92033	-10	0.159343	1.47188	(1, 1.5]
AKG1	BLP1	AKG	BLP	AKG1BLP1	Glucose	-0.0107751	-1	0.0477277	-0.476136	-1	0.0477277	1.47188	(1, 1.5]
AKG1	BLP1	AKG	BLP	AKG1BLP1	Glycerol	0.0307267	-10	0.0191829	-4.99041	-10	0.0191829	1.47188	(1, 1.5]
AKG1	BRC1	AKG	BRC	AKG1BRC1	Glu+Sorbitol	-10	-10	0.107766	-4.94612	-10	0.107766	1.45896	(1, 1.5]
AKG1	BRC1	AKG	BRC	AKG1BRC1	Glucose	-10	-1	-0.0843597	-0.54218	-1	-0.0843597	1.45896	(1, 1.5]
AKG1	BRC1	AKG	BRC	AKG1BRC1	Glycerol	-10	-10	-0.0845599	-5.04228	-10	-0.0845599	1.45896	(1, 1.5]
AKG1	BPT1	AKG	BPT	AKG1BPT1	Glu+Sorbitol	-1	-10	0.0437225	-4.97814	-10	0.0437225	1.46675	(1, 1.5]
AKG1	BPT1	AKG	BPT	AKG1BPT1	Glucose	-10	-1	-0.0226414	-0.511321	-1	-0.0226414	1.46675	(1, 1.5]
AKG1	BPT1	AKG	BPT	AKG1BPT1	Glycerol	0.0437985	-10	0.0527905	-4.9736	-10	0.0527905	1.46675	(1, 1.5]
AKG1	BRD1	AKG	BRD	AKG1BRD1	Glu+Sorbitol	-10	-10	0.0462453	-4.97688	-10	0.0462453	1.46753	(1, 1.5]
AKG1	BRD1	AKG	BRD	AKG1BRD1	Glucose	-0.018262	-1	-0.0248454	-0.512423	-1	-0.0248454	1.46753	(1, 1.5]
AKG1	BRD1	AKG	BRD	AKG1BRD1	Glycerol	0.0938122	-10	0.10436	-4.94782	-10	0.10436	1.46753	(1, 1.5]
AKG1	BMK1	AKG	BMK	AKG1BMK1	Glu+Sorbitol	-10	-10	0.10245	-4.94877	-10	0.10245	1.4695	(1, 1.5]
AKG1	BMK1	AKG	BMK	AKG1BMK1	Glucose	-0.115319	-1	0.0206207	-0.48969	-1	0.0206207	1.4695	(1, 1.5]
AKG1	BMK1	AKG	BMK	AKG1BMK1	Glycerol	0.0592738	-10	0.0727937	-4.9636	-10	0.0727937	1.4695	(1, 1.5]
AKG1	BQP1	AKG	BQP	AKG1BQP1	Glu+Sorbitol	-10	-10	0.108223	-4.94589	-10	0.108223	1.45595	(1, 1.5]
AKG1	BQP1	AKG	BQP	AKG1BQP1	Glucose	-0.0475873	-1	0.0119541	-0.494023	-1	0.0119541	1.45595	(1, 1.5]
AKG1	BQP1	AKG	BQP	AKG1BQP1	Glycerol	-10	-10	-0.0301991	-5.0151	-10	-0.0301991	1.45595	(1, 1.5]
AKG1	BLV1	AKG	BLV	AKG1BLV1	Glu+Sorbitol	-10	-10	0.148788	-4.92561	-10	0.148788	1.46969	(1, 1.5]
AKG1	BLV1	AKG	BLV	AKG1BLV1	Glucose	-10	-1	-0.0681483	-0.534074	-1	-0.0681483	1.46969	(1, 1.5]
AKG1	BLV1	AKG	BLV	AKG1BLV1	Glycerol	0.0754272	-10	0.0838921	-4.95805	-10	0.0838921	1.46969	(1, 1.5]
AKG1	BQQ1	AKG	BQQ	AKG1BQQ1	Glu+Sorbitol	-10	-10	0.0432009	-4.9784	-10	0.0432009	1.46846	(1, 1.5]
AKG1	BQQ1	AKG	BQQ	AKG1BQQ1	Glucose	-10	-1	0.0291802	-0.48541	-1	0.0291802	1.46846	(1, 1.5]
AKG1	BQQ1	AKG	BQQ	AKG1BQQ1	Glycerol	-10	-10	0.0824425	-4.95878	-10	0.0824425	1.46846	(1, 1.5]
AKG1	BMA1	AKG	BMA	AKG1BMA1	Glu+Sorbitol	-10	-10	0.0267219	-4.98664	-10	0.0267219	1.44568	(1, 1.5]
AKG1	BMA1	AKG	BMA	AKG1BMA1	Glucose	-10	-1	0.0277247	-0.486138	-1	0.0277247	1.44568	(1, 1.5]
AKG1	BMA1	AKG	BMA	AKG1BMA1	Glycerol	0.0545112	-10	0.0885346	-4.95573	-10	0.0885346	1.44568	(1, 1.5]
AKG1	BQR1	AKG	BQR	AKG1BQR1	Glu+Sorbitol	-10	-10	0.0524282	-4.97379	-10	0.0524282	1.46845	(1, 1.5]
AKG1	BQR1	AKG	BQR	AKG1BQR1	Glucose	-10	-1	-0.0545715	-0.527286	-1	-0.0545715	1.46845	(1, 1.5]
AKG1	BQR1	AKG	BQR	AKG1BQR1	Glycerol	0.0732353	-10	0.0588489	-4.97058	-10	0.0588489	1.46845	(1, 1.5]
AKG1	CAD1	AKG	CAD	AKG1CAD1	Glu+Sorbitol	-10	-10	0.0934632	-4.95327	-10	0.0934632	1.49512	(1, 1.5]
AKG1	CAD1	AKG	CAD	AKG1CAD1	Glucose	-10	-1	-0.0194773	-0.509739	-1	-0.0194773	1.49512	(1, 1.5]
AKG1	CAD1	AKG	CAD	AKG1CAD1	Glycerol	-10	-10	-10	-10	-10	-10	1.49512	(1, 1.5]
AKG1	BSB1	AKG	BSB	AKG1BSB1	Glu+Sorbitol	-10	-10	-10	-10	-10	-10	1.46644	(1, 1.5]
AKG1	BSB1	AKG	BSB	AKG1BSB1	Glucose	-10	-1	-10	-1	-1	-1	1.46644	(1, 1.5]
AKG1	BSB1	AKG	BSB	AKG1BSB1	Glycerol	-10	-10	-10	-10	-10	-10	1.46644	(1, 1.5]
AKG1	BTH1	AKG	BTH	AKG1BTH1	Glu+Sorbitol	-0.104424	-10	0.0555657	-4.97222	-10	0.0555657	1.4613	(1, 1.5]
AKG1	BTH1	AKG	BTH	AKG1BTH1	Glucose	-10	-1	-0.01391	-0.506955	-1	-0.01391	1.4613	(1, 1.5]
AKG1	BTH1	AKG	BTH	AKG1BTH1	Glycerol	-10	-10	-1	-5.5	-10	-1	1.4613	(1, 1.5]
AKG1	AHP1	AKG	AHP	AKG1AHP1	Glu+Sorbitol	-10	-10	-1	-5.5	-10	-1	1.50097	(1, 1.5]
AKG1	AHP1	AKG	AHP	AKG1AHP1	Glucose	-10	-1	-1	-1	-1	-1	1.50097	(1, 1.5]
AKG1	AHP1	AKG	AHP	AKG1AHP1	Glycerol	0.0559265	-10	0.0888156	-4.95559	-10	0.0888156	1.50097	(1, 1.5]
AKG1	CQD1	AKG	CQD	AKG1CQD1	Glu+Sorbitol	-10	-10	0.0454048	-4.9773	-10	0.0454048	1.28467	(1, 1.5]
AKG1	CQD1	AKG	CQD	AKG1CQD1	Glucose	0.0492416	-1	0.0106465	-0.494677	-1	0.0106465	1.28467	(1, 1.5]
AKG1	CQD1	AKG	CQD	AKG1CQD1	Glycerol	-10	-10	-10	-10	-10	-10	1.28467	(1, 1.5]
AKG1	APV1	AKG	APV	AKG1APV1	Glu+Sorbitol	-0.137336	-10	0.0394829	-4.98026	-10	0.0394829	1.4675	(1, 1.5]
AKG1	APV1	AKG	APV	AKG1APV1	Glucose	0.139462	-1	-0.0613302	-0.530665	-1	-0.0613302	1.4675	(1, 1.5]
AKG1	APV1	AKG	APV	AKG1APV1	Glycerol	0.0617637	-10	0.176787	-4.91161	-10	0.176787	1.4675	(1, 1.5]
AKG1	AST1	AKG	AST	AKG1AST1	Glu+Sorbitol	-10	-10	-1	-5.5	-10	-1	1.42756	(1, 1.5]
AKG1	AST1	AKG	AST	AKG1AST1	Glucose	-1	-1	0.0143308	-0.492835	-1	0.0143308	1.42756	(1, 1.5]
AKG1	AST1	AKG	AST	AKG1AST1	Glycerol	-10	-10	-1	-5.5	-10	-1	1.42756	(1, 1.5]
AKG1	CCV1	AKG	CCV	AKG1CCV1	Glu+Sorbitol	-10	-10	0.107101	-4.94645	-10	0.107101	1.26344	(1, 1.5]
AKG1	CCV1	AKG	CCV	AKG1CCV1	Glucose	-10	-1	0.044604	-0.477698	-1	0.044604	1.26344	(1, 1.5]
AKG1	CCV1	AKG	CCV	AKG1CCV1	Glycerol	-10	-10	-1	-5.5	-10	-1	1.26344	(1, 1.5]
AKG1	YAR1	AKG	YAR	AKG1YAR1	Glu+Sorbitol	-10	-10	-1	-5.5	-10	-1	1.30142	(1, 1.5]
AKG1	YAR1	AKG	YAR	AKG1YAR1	Glucose	-10	-1	-0.0705407	-0.53527	-1	-0.0705407	1.30142	(1, 1.5]
AKG1	YAR1	AKG	YAR	AKG1YAR1	Glycerol	-10	-10	-1	-5.5	-10	-1	1.30142	(1, 1.5]
AKG1	YBU1	AKG	YBU	AKG1YBU1	Glu+Sorbitol	-10	-10	-1	-5.5	-10	-1	1.35403	(1, 1.5]
AKG1	YBU1	AKG	YBU	AKG1YBU1	Glucose	-10	-1	-10	-5.5	-10	-1	1.35403	(1, 1.5]
AKG1	YBU1	AKG	YBU	AKG1YBU1	Glycerol	-10	-10	-1	-5.5	-10	-1	1.35403	(1, 1.5]
AKV1	AKB1	AKV	AKB	AKV1AKB1	Glu+Sorbitol	-0.140272	-10	0.139707	0.139707	0.139707	0.139707	1.53322	(1, 1.5]
AKV1	AKB1	AKV	AKB	AKV1AKB1	Glucose	0.015877	-10	-0.0154866	-0.0154866	-0.0154866	-0.0154866	1.53322	(1, 1.5]
AKV1	AKB1	AKV	AKB	AKV1AKB1	Glycerol	0.00617814	-10	-1	-1	-1	-1	1.53322	(1, 1.5]
AKV1	AKP1	AKV	AKP	AKV1AKP1	Glu+Sorbitol	0.0453917	-10	0.0982963	0.0982963	0.0982963	0.0982963	0.00112418	(0,0.05]
AKV1	AKP1	AKV	AKP	AKV1AKP1	Glucose	-0.0891314	-10	-0.0557565	-0.0557565	-0.0557565	-0.0557565	0.00112418	(0,0.05]
AKV1	AKP1	AKV	AKP	AKV1AKP1	Glycerol	-10	-10	-0.109008	-0.109008	-0.109008	-0.109008	0.00112418	(0,0.05]
AKV1	ALG1	AKV	ALG	AKV1ALG1	Glu+Sorbitol	-10	-10	0.0868454	0.0868454	0.0868454	0.0868454	0.775317	(0.5,1]
AKV1	ALG1	AKV	ALG	AKV1ALG1	Glucose	-10	-10	-0.141619	-0.141619	-0.141619	-0.141619	0.775317	(0.5,1]
AKV1	ALG1	AKV	ALG	AKV1ALG1	Glycerol	-10	-10	-0.0464457	-0.0464457	-0.0464457	-0.0464457	0.775317	(0.5,1]
AKV1	ANG1	AKV	ANG	AKV1ANG1	Glu+Sorbitol	-10	-10	0.0628167	0.0628167	0.0628167	0.0628167	1.32204	(1, 1.5]
AKV1	ANG1	AKV	ANG	AKV1ANG1	Glucose	-10	-10	0.0663533	0.0663533	0.0663533	0.0663533	1.32204	(1, 1.5]
AKV1	ANG1	AKV	ANG	AKV1ANG1	Glycerol	-10	-10	-1	-1	-1	-1	1.32204	(1, 1.5]
AKV1	AIM1	AKV	AIM	AKV1AIM1	Glu+Sorbitol	-10	-10	-1	-1	-1	-1	0.272524	(0.05,0.5]
AKV1	AIM1	AKV	AIM	AKV1AIM1	Glucose	-10	-10	-10	-10	-10	-10	0.272524	(0.05,0.5]
AKV1	AIM1	AKV	AIM	AKV1AIM1	Glycerol	-10	-10	-10	-10	-10	-10	0.272524	(0.05,0.5]
AKV1	AKV1	AKV	AKV	AKV1AKV1	Glu+Sorbitol	-1	-10	0.0943177	0.0943177	0.0943177	0.0943177	0	(0,0.05]
AKV1	AKV1	AKV	AKV	AKV1AKV1	Glucose	-0.030873	-10	-0.033945	-0.033945	-0.033945	-0.033945	0	(0,0.05]
AKV1	AKV1	AKV	AKV	AKV1AKV1	Glycerol	-1	-10	-0.0735332	-0.0735332	-0.0735332	-0.0735332	0	(0,0.05]
AKV1	BBI1	AKV	BBI	AKV1BBI1	Glu+Sorbitol	-10	-10	0.242166	0.242166	0.242166	0.242166	0.199294	(0.05,0.5]
AKV1	BBI1	AKV	BBI	AKV1BBI1	Glucose	-10	-10	0.0118567	0.0118567	0.0118567	0.0118567	0.199294	(0.05,0.5]
AKV1	BBI1	AKV	BBI	AKV1BBI1	Glycerol	-10	-10	-0.0628554	-0.0628554	-0.0628554	-0.0628554	0.199294	(0.05,0.5]
AKV1	BAK1	AKV	BAK	AKV1BAK1	Glu+Sorbitol	-0.0261143	-10	0.0545167	0.0545167	0.0545167	0.0545167	1.46399	(1, 1.5]
AKV1	BAK1	AKV	BAK	AKV1BAK1	Glucose	0.0562078	-10	0.0639478	0.0639478	0.0639478	0.0639478	1.46399	(1, 1.5]
AKV1	BAK1	AKV	BAK	AKV1BAK1	Glycerol	0.121635	-10	-0.00177197	-0.00177197	-0.00177197	-0.00177197	1.46399	(1, 1.5]
AKV1	BEH1	AKV	BEH	AKV1BEH1	Glu+Sorbitol	-10	-10	0.114205	0.114205	0.114205	0.114205	1.45872	(1, 1.5]
AKV1	BEH1	AKV	BEH	AKV1BEH1	Glucose	-10	-10	-0.0314472	-0.0314472	-0.0314472	-0.0314472	1.45872	(1, 1.5]
AKV1	BEH1	AKV	BEH	AKV1BEH1	Glycerol	-10	-10	-1	-1	-1	-1	1.45872	(1, 1.5]
AKV1	BLA1	AKV	BLA	AKV1BLA1	Glu+Sorbitol	-0.117199	-10	-10	-10	-10	-10	0.186532	(0.05,0.5]
AKV1	BLA1	AKV	BLA	AKV1BLA1	Glucose	0.0412708	-10	-10	-10	-10	-10	0.186532	(0.05,0.5]
AKV1	BLA1	AKV	BLA	AKV1BLA1	Glycerol	-10	-10	-10	-10	-10	-10	0.186532	(0.05,0.5]
AKV1	BHM1	AKV	BHM	AKV1BHM1	Glu+Sorbitol	-10	-10	-1	-1	-1	-1	0.27514	(0.05,0.5]
AKV1	BHM1	AKV	BHM	AKV1BHM1	Glucose	-10	-10	-10	-10	-10	-10	0.27514	(0.05,0.5]
AKV1	BHM1	AKV	BHM	AKV1BHM1	Glycerol	-10	-10	-1	-1	-1	-1	0.27514	(0.05,0.5]
AKV1	BHN1	AKV	BHN	AKV1BHN1	Glu+Sorbitol	-10	-10	0.00750642	0.00750642	0.00750642	0.00750642	0.202943	(0.05,0.5]
AKV1	BHN1	AKV	BHN	AKV1BHN1	Glucose	-0.0530312	-10	-1	-1	-1	-1	0.202943	(0.05,0.5]
AKV1	BHN1	AKV	BHN	AKV1BHN1	Glycerol	-10	-10	-1	-1	-1	-1	0.202943	(0.05,0.5]
AKV1	BHB1	AKV	BHB	AKV1BHB1	Glu+Sorbitol	-1	-10	-1	-1	-1	-1	0.273139	(0.05,0.5]
AKV1	BHB1	AKV	BHB	AKV1BHB1	Glucose	-1	-10	-10	-10	-10	-10	0.273139	(0.05,0.5]
AKV1	BHB1	AKV	BHB	AKV1BHB1	Glycerol	-10	-10	-10	-10	-10	-10	0.273139	(0.05,0.5]
AKV1	BLE1	AKV	BLE	AKV1BLE1	Glu+Sorbitol	-0.038246	-10	-1	-1	-1	-1	0.184858	(0.05,0.5]
AKV1	BLE1	AKV	BLE	AKV1BLE1	Glucose	-10	-10	-0.0748489	-0.0748489	-0.0748489	-0.0748489	0.184858	(0.05,0.5]
AKV1	BLE1	AKV	BLE	AKV1BLE1	Glycerol	-10	-10	-0.044381	-0.044381	-0.044381	-0.044381	0.184858	(0.05,0.5]
AKV1	BHF1	AKV	BHF	AKV1BHF1	Glu+Sorbitol	-10	-10	0.0591106	0.0591106	0.0591106	0.0591106	0.181954	(0.05,0.5]
AKV1	BHF1	AKV	BHF	AKV1BHF1	Glucose	-0.00601464	-10	0.0612509	0.0612509	0.0612509	0.0612509	0.181954	(0.05,0.5]
AKV1	BHF1	AKV	BHF	AKV1BHF1	Glycerol	-0.033358	-10	0.0945635	0.0945635	0.0945635	0.0945635	0.181954	(0.05,0.5]
AKV1	BKR1	AKV	BKR	AKV1BKR1	Glu+Sorbitol	-10	-10	-1	-1	-1	-1	0.194512	(0.05,0.5]
AKV1	BKR1	AKV	BKR	AKV1BKR1	Glucose	-0.0252852	-10	-0.013402	-0.013402	-0.013402	-0.013402	0.194512	(0.05,0.5]
AKV1	BKR1	AKV	BKR	AKV1BKR1	Glycerol	-0.0570877	-10	-1	-1	-1	-1	0.194512	(0.05,0.5]
AKV1	BLL1	AKV	BLL	AKV1BLL1	Glu+Sorbitol	-0.0764901	-10	-1	-1	-1	-1	0.191344	(0.05,0.5]
AKV1	BLL1	AKV	BLL	AKV1BLL1	Glucose	-0.0538701	-10	-1	-1	-1	-1	0.191344	(0.05,0.5]
AKV1	BLL1	AKV	BLL	AKV1BLL1	Glycerol	-0.0290336	-10	0.120353	0.120353	0.120353	0.120353	0.191344	(0.05,0.5]
AKV1	BNI1	AKV	BNI	AKV1BNI1	Glu+Sorbitol	-10	-10	-10				0.195029	(0.05,0.5]
AKV1	BNI1	AKV	BNI	AKV1BNI1	Glucose	-10	-10	-10				0.195029	(0.05,0.5]
AKV1	BNI1	AKV	BNI	AKV1BNI1	Glycerol	-10	-10	-10				0.195029	(0.05,0.5]
AKV1	BQG1	AKV	BQG	AKV1BQG1	Glu+Sorbitol	0.0870229	-10	0.133013	0.133013	0.133013	0.133013	0.191731	(0.05,0.5]
AKV1	BQG1	AKV	BQG	AKV1BQG1	Glucose	0.00525719	-10	-0.0571925	-0.0571925	-0.0571925	-0.0571925	0.191731	(0.05,0.5]
AKV1	BQG1	AKV	BQG	AKV1BQG1	Glycerol	-0.0650156	-10	0.0537228	0.0537228	0.0537228	0.0537228	0.191731	(0.05,0.5]
AKV1	BNK1	AKV	BNK	AKV1BNK1	Glu+Sorbitol	-0.123837	-10	-1	-1	-1	-1	0.188307	(0.05,0.5]
AKV1	BNK1	AKV	BNK	AKV1BNK1	Glucose	-0.0203228	-10	-0.0796816	-0.0796816	-0.0796816	-0.0796816	0.188307	(0.05,0.5]
AKV1	BNK1	AKV	BNK	AKV1BNK1	Glycerol	-0.000135143	-10	0.115878	0.115878	0.115878	0.115878	0.188307	(0.05,0.5]
AKV1	BPQ1	AKV	BPQ	AKV1BPQ1	Glu+Sorbitol	0.0773266	-10	0.196057	0.196057	0.196057	0.196057	0.216897	(0.05,0.5]
AKV1	BPQ1	AKV	BPQ	AKV1BPQ1	Glucose	0.0258736	-10	0.00714221	0.00714221	0.00714221	0.00714221	0.216897	(0.05,0.5]
AKV1	BPQ1	AKV	BPQ	AKV1BPQ1	Glycerol	-0.029932	-10	0.0632255	0.0632255	0.0632255	0.0632255	0.216897	(0.05,0.5]
AKV1	BQH1	AKV	BQH	AKV1BQH1	Glu+Sorbitol	-0.0566972	-10	0.00347705	0.00347705	0.00347705	0.00347705	0.18922	(0.05,0.5]
AKV1	BQH1	AKV	BQH	AKV1BQH1	Glucose	-0.0410037	-10	0.0201877	0.0201877	0.0201877	0.0201877	0.18922	(0.05,0.5]
AKV1	BQH1	AKV	BQH	AKV1BQH1	Glycerol	-10	-10	-1	-1	-1	-1	0.18922	(0.05,0.5]
AKV1	BRA1	AKV	BRA	AKV1BRA1	Glu+Sorbitol	-10	-10	0.0670496	0.0670496	0.0670496	0.0670496	0.20499	(0.05,0.5]
AKV1	BRA1	AKV	BRA	AKV1BRA1	Glucose	-10	-10	-0.0988197	-0.0988197	-0.0988197	-0.0988197	0.20499	(0.05,0.5]
AKV1	BRA1	AKV	BRA	AKV1BRA1	Glycerol	-10	-10	-1	-1	-1	-1	0.20499	(0.05,0.5]
AKV1	BLN1	AKV	BLN	AKV1BLN1	Glu+Sorbitol	-10	-10	-10				0.186252	(0.05,0.5]
AKV1	BLN1	AKV	BLN	AKV1BLN1	Glucose	-10	-10	-10				0.186252	(0.05,0.5]
AKV1	BLN1	AKV	BLN	AKV1BLN1	Glycerol	-10	-10	-10				0.186252	(0.05,0.5]
AKV1	BQI1	AKV	BQI	AKV1BQI1	Glu+Sorbitol	0.0616801	-10	0.143956	0.143956	0.143956	0.143956	0.188267	(0.05,0.5]
AKV1	BQI1	AKV	BQI	AKV1BQI1	Glucose	-0.0118848	-10	-0.108288	-0.108288	-0.108288	-0.108288	0.188267	(0.05,0.5]
AKV1	BQI1	AKV	BQI	AKV1BQI1	Glycerol	-10	-10	-0.01173	-0.01173	-0.01173	-0.01173	0.188267	(0.05,0.5]
AKV1	BRB1	AKV	BRB	AKV1BRB1	Glu+Sorbitol	-0.012912	-10	0.109832	0.109832	0.109832	0.109832	0.258693	(0.05,0.5]
AKV1	BRB1	AKV	BRB	AKV1BRB1	Glucose	0.0206234	-10	0.0350566	0.0350566	0.0350566	0.0350566	0.258693	(0.05,0.5]
AKV1	BRB1	AKV	BRB	AKV1BRB1	Glycerol	-0.0496848	-10	0.000627839	0.000627839	0.000627839	0.000627839	0.258693	(0.05,0.5]
AKV1	BLP1	AKV	BLP	AKV1BLP1	Glu+Sorbitol	-0.0215238	-10	0.159343	0.159343	0.159343	0.159343	0.186702	(0.05,0.5]
AKV1	BLP1	AKV	BLP	AKV1BLP1	Glucose	0.0184917	-10	0.0477277	0.0477277	0.0477277	0.0477277	0.186702	(0.05,0.5]
AKV1	BLP1	AKV	BLP	AKV1BLP1	Glycerol	-0.0344127	-10	0.0191829	0.0191829	0.0191829	0.0191829	0.186702	(0.05,0.5]
AKV1	BRC1	AKV	BRC	AKV1BRC1	Glu+Sorbitol	-10	-10	0.107766	0.107766	0.107766	0.107766	0.19795	(0.05,0.5]
AKV1	BRC1	AKV	BRC	AKV1BRC1	Glucose	-0.000504864	-10	-0.0843597	-0.0843597	-0.0843597	-0.0843597	0.19795	(0.05,0.5]
AKV1	BRC1	AKV	BRC	AKV1BRC1	Glycerol	-10	-10	-0.0845599	-0.0845599	-0.0845599	-0.0845599	0.19795	(0.05,0.5]
AKV1	BPT1	AKV	BPT	AKV1BPT1	Glu+Sorbitol	-0.212816	-10	0.0437225	0.0437225	0.0437225	0.0437225	0.188255	(0.05,0.5]
AKV1	BPT1	AKV	BPT	AKV1BPT1	Glucose	-0.0174869	-10	-0.0226414	-0.0226414	-0.0226414	-0.0226414	0.188255	(0.05,0.5]
AKV1	BPT1	AKV	BPT	AKV1BPT1	Glycerol	-1	-10	0.0527905	0.0527905	0.0527905	0.0527905	0.188255	(0.05,0.5]
AKV1	BRD1	AKV	BRD	AKV1BRD1	Glu+Sorbitol	0.0605471	-10	0.0462453	0.0462453	0.0462453	0.0462453	0.183545	(0.05,0.5]
AKV1	BRD1	AKV	BRD	AKV1BRD1	Glucose	0.00577745	-10	-0.0248454	-0.0248454	-0.0248454	-0.0248454	0.183545	(0.05,0.5]
AKV1	BRD1	AKV	BRD	AKV1BRD1	Glycerol	-0.0459358	-10	0.10436	0.10436	0.10436	0.10436	0.183545	(0.05,0.5]
AKV1	BMK1	AKV	BMK	AKV1BMK1	Glu+Sorbitol	-0.0178434	-10	0.10245	0.10245	0.10245	0.10245	0.182602	(0.05,0.5]
AKV1	BMK1	AKV	BMK	AKV1BMK1	Glucose	0.00289475	-10	0.0206207	0.0206207	0.0206207	0.0206207	0.182602	(0.05,0.5]
AKV1	BMK1	AKV	BMK	AKV1BMK1	Glycerol	-10	-10	0.0727937	0.0727937	0.0727937	0.0727937	0.182602	(0.05,0.5]
AKV1	BQP1	AKV	BQP	AKV1BQP1	Glu+Sorbitol	-0.0331317	-10	0.108223	0.108223	0.108223	0.108223	0.222735	(0.05,0.5]
AKV1	BQP1	AKV	BQP	AKV1BQP1	Glucose	0.00144969	-10	0.0119541	0.0119541	0.0119541	0.0119541	0.222735	(0.05,0.5]
AKV1	BQP1	AKV	BQP	AKV1BQP1	Glycerol	-10	-10	-0.0301991	-0.0301991	-0.0301991	-0.0301991	0.222735	(0.05,0.5]
AKV1	BLV1	AKV	BLV	AKV1BLV1	Glu+Sorbitol	0.0550444	-10	0.148788	0.148788	0.148788	0.148788	0.191622	(0.05,0.5]
AKV1	BLV1	AKV	BLV	AKV1BLV1	Glucose	0.0152851	-10	-0.0681483	-0.0681483	-0.0681483	-0.0681483	0.191622	(0.05,0.5]
AKV1	BLV1	AKV	BLV	AKV1BLV1	Glycerol	-0.0175543	-10	0.0838921	0.0838921	0.0838921	0.0838921	0.191622	(0.05,0.5]
AKV1	BQQ1	AKV	BQQ	AKV1BQQ1	Glu+Sorbitol	-0.0461912	-10	0.0432009	0.0432009	0.0432009	0.0432009	0.188479	(0.05,0.5]
AKV1	BQQ1	AKV	BQQ	AKV1BQQ1	Glucose	-10	-10	0.0291802	0.0291802	0.0291802	0.0291802	0.188479	(0.05,0.5]
AKV1	BQQ1	AKV	BQQ	AKV1BQQ1	Glycerol	-10	-10	0.0824425	0.0824425	0.0824425	0.0824425	0.188479	(0.05,0.5]
AKV1	BMA1	AKV	BMA	AKV1BMA1	Glu+Sorbitol	-1	-10	0.0267219	0.0267219	0.0267219	0.0267219	1.55964	(1, 1.5]
AKV1	BMA1	AKV	BMA	AKV1BMA1	Glucose	-10	-10	0.0277247	0.0277247	0.0277247	0.0277247	1.55964	(1, 1.5]
AKV1	BMA1	AKV	BMA	AKV1BMA1	Glycerol	0.00390183	-10	0.0885346	0.0885346	0.0885346	0.0885346	1.55964	(1, 1.5]
AKV1	BQR1	AKV	BQR	AKV1BQR1	Glu+Sorbitol	-0.110768	-10	0.0524282	0.0524282	0.0524282	0.0524282	0.184058	(0.05,0.5]
AKV1	BQR1	AKV	BQR	AKV1BQR1	Glucose	-0.029942	-10	-0.0545715	-0.0545715	-0.0545715	-0.0545715	0.184058	(0.05,0.5]
AKV1	BQR1	AKV	BQR	AKV1BQR1	Glycerol	-0.0246417	-10	0.0588489	0.0588489	0.0588489	0.0588489	0.184058	(0.05,0.5]
AKV1	CAD1	AKV	CAD	AKV1CAD1	Glu+Sorbitol	-10	-10	0.0934632	0.0934632	0.0934632	0.0934632	0.332942	(0.05,0.5]
AKV1	CAD1	AKV	CAD	AKV1CAD1	Glucose	-10	-10	-0.0194773	-0.0194773	-0.0194773	-0.0194773	0.332942	(0.05,0.5]
AKV1	CAD1	AKV	CAD	AKV1CAD1	Glycerol	-10	-10	-10	-10	-10	-10	0.332942	(0.05,0.5]
AKV1	BSB1	AKV	BSB	AKV1BSB1	Glu+Sorbitol	-10	-10	-10	-10	-10	-10	0.178417	(0.05,0.5]
AKV1	BSB1	AKV	BSB	AKV1BSB1	Glucose	-10	-10	-10				0.178417	(0.05,0.5]
AKV1	BSB1	AKV	BSB	AKV1BSB1	Glycerol	-10	-10	-10				0.178417	(0.05,0.5]
AKV1	BTH1	AKV	BTH	AKV1BTH1	Glu+Sorbitol	-1	-10	0.0555657	0.0555657	0.0555657	0.0555657	0.181894	(0.05,0.5]
AKV1	BTH1	AKV	BTH	AKV1BTH1	Glucose	-0.0630631	-10	-0.01391	-0.01391	-0.01391	-0.01391	0.181894	(0.05,0.5]
AKV1	BTH1	AKV	BTH	AKV1BTH1	Glycerol	-10	-10	-1	-1	-1	-1	0.181894	(0.05,0.5]
AKV1	AHP1	AKV	AHP	AKV1AHP1	Glu+Sorbitol	-0.0900834	-10	-1	-1	-1	-1	0.34189	(0.05,0.5]
AKV1	AHP1	AKV	AHP	AKV1AHP1	Glucose	0.00842671	-10	-1	-1	-1	-1	0.34189	(0.05,0.5]
AKV1	AHP1	AKV	AHP	AKV1AHP1	Glycerol	-10	-10	0.0888156	0.0888156	0.0888156	0.0888156	0.34189	(0.05,0.5]
AKV1	CQD1	AKV	CQD	AKV1CQD1	Glu+Sorbitol	-0.0649065	-10	0.0454048	0.0454048	0.0454048	0.0454048	0.770183	(0.5,1]
AKV1	CQD1	AKV	CQD	AKV1CQD1	Glucose	0.040525	-10	0.0106465	0.0106465	0.0106465	0.0106465	0.770183	(0.5,1]
AKV1	CQD1	AKV	CQD	AKV1CQD1	Glycerol	-10	-10	-10	-10	-10	-10	0.770183	(0.5,1]
AKV1	APV1	AKV	APV	AKV1APV1	Glu+Sorbitol	-0.146038	-10	0.0394829	0.0394829	0.0394829	0.0394829	0.183354	(0.05,0.5]
AKV1	APV1	AKV	APV	AKV1APV1	Glucose	0.014231	-10	-0.0613302	-0.0613302	-0.0613302	-0.0613302	0.183354	(0.05,0.5]
AKV1	APV1	AKV	APV	AKV1APV1	Glycerol	-0.0652687	-10	0.176787	0.176787	0.176787	0.176787	0.183354	(0.05,0.5]
AKV1	AST1	AKV	AST	AKV1AST1	Glu+Sorbitol	-0.0687029	-10	-1	-1	-1	-1	0.305373	(0.05,0.5]
AKV1	AST1	AKV	AST	AKV1AST1	Glucose	0.0388041	-10	0.0143308	0.0143308	0.0143308	0.0143308	0.305373	(0.05,0.5]
AKV1	AST1	AKV	AST	AKV1AST1	Glycerol	-10	-10	-1	-1	-1	-1	0.305373	(0.05,0.5]
AKV1	CCV1	AKV	CCV	AKV1CCV1	Glu+Sorbitol	-0.000618682	-10	0.107101	0.107101	0.107101	0.107101	1.4545	(1, 1.5]
AKV1	CCV1	AKV	CCV	AKV1CCV1	Glucose	-0.048277	-10	0.044604	0.044604	0.044604	0.044604	1.4545	(1, 1.5]
AKV1	CCV1	AKV	CCV	AKV1CCV1	Glycerol	-10	-10	-1	-1	-1	-1	1.4545	(1, 1.5]
AKV1	YAR1	AKV	YAR	AKV1YAR1	Glu+Sorbitol	-0.0541071	-10	-1	-1	-1	-1	0.807327	(0.5,1]
AKV1	YAR1	AKV	YAR	AKV1YAR1	Glucose	0.0190468	-10	-0.0705407	-0.0705407	-0.0705407	-0.0705407	0.807327	(0.5,1]
AKV1	YAR1	AKV	YAR	AKV1YAR1	Glycerol	-10	-10	-1	-1	-1	-1	0.807327	(0.5,1]
AKV1	YBU1	AKV	YBU	AKV1YBU1	Glu+Sorbitol	-10	-10	-1	-1	-1	-1	1.07447	(0.5,1]
AKV1	YBU1	AKV	YBU	AKV1YBU1	Glucose	-10	-10	-10	-10	-10	-10	1.07447	(0.5,1]
AKV1	YBU1	AKV	YBU	AKV1YBU1	Glycerol	-10	-10	-1	-1	-1	-1	1.07447	(0.5,1]
ANE1	AKB1	ANE	AKB	ANE1AKB1	Glu+Sorbitol	0.0422404	-1	0.139707	-0.430147	-1	0.139707	1.11621	(1, 1.5]
ANE1	AKB1	ANE	AKB	ANE1AKB1	Glucose	-10	0.0520262	-0.0154866	0.0182698	-0.0154866	0.0520262	1.11621	(1, 1.5]
ANE1	AKB1	ANE	AKB	ANE1AKB1	Glycerol	0.098413	0.0364158	-1	-0.481792	-1	0.0364158	1.11621	(1, 1.5]
ANE1	AKP1	ANE	AKP	ANE1AKP1	Glu+Sorbitol	-10	-1	0.0982963	-0.450852	-1	0.0982963	1.32148	(1, 1.5]
ANE1	AKP1	ANE	AKP	ANE1AKP1	Glucose	0.0629274	0.0520262	-0.0557565	-0.00186513	-0.0557565	0.0520262	1.32148	(1, 1.5]
ANE1	AKP1	ANE	AKP	ANE1AKP1	Glycerol	0.134106	0.0364158	-0.109008	-0.0362963	-0.109008	0.0364158	1.32148	(1, 1.5]
ANE1	ALG1	ANE	ALG	ANE1ALG1	Glu+Sorbitol	-10	-1	0.0868454	-0.456577	-1	0.0868454	1.00431	(0.5,1]
ANE1	ALG1	ANE	ALG	ANE1ALG1	Glucose	-10	0.0520262	-0.141619	-0.0447962	-0.141619	0.0520262	1.00431	(0.5,1]
ANE1	ALG1	ANE	ALG	ANE1ALG1	Glycerol	-10	0.0364158	-0.0464457	-0.00501495	-0.0464457	0.0364158	1.00431	(0.5,1]
ANE1	ANG1	ANE	ANG	ANE1ANG1	Glu+Sorbitol	-10	-1	0.0628167	-0.468592	-1	0.0628167	0.00265532	(0,0.05]
ANE1	ANG1	ANE	ANG	ANE1ANG1	Glucose	-10	0.0520262	0.0663533	0.0591898	0.0520262	0.0663533	0.00265532	(0,0.05]
ANE1	ANG1	ANE	ANG	ANE1ANG1	Glycerol	-10	0.0364158	-1	-0.481792	-1	0.0364158	0.00265532	(0,0.05]
ANE1	AIM1	ANE	AIM	ANE1AIM1	Glu+Sorbitol	-10	-1	-1	-1	-1	-1	1.34627	(1, 1.5]
ANE1	AIM1	ANE	AIM	ANE1AIM1	Glucose	-10	0.0520262	-10	-4.97399	-10	0.0520262	1.34627	(1, 1.5]
ANE1	AIM1	ANE	AIM	ANE1AIM1	Glycerol	-10	0.0364158	-10	-4.98179	-10	0.0364158	1.34627	(1, 1.5]
ANE1	AKV1	ANE	AKV	ANE1AKV1	Glu+Sorbitol	-10	-1	0.0943177	-0.452841	-1	0.0943177	1.32135	(1, 1.5]
ANE1	AKV1	ANE	AKV	ANE1AKV1	Glucose	0.0728354	0.0520262	-0.033945	0.00904061	-0.033945	0.0520262	1.32135	(1, 1.5]
ANE1	AKV1	ANE	AKV	ANE1AKV1	Glycerol	0.124372	0.0364158	-0.0735332	-0.0185587	-0.0735332	0.0364158	1.32135	(1, 1.5]
ANE1	BBI1	ANE	BBI	ANE1BBI1	Glu+Sorbitol	-10	-1	0.242166	-0.378917	-1	0.242166	1.32145	(1, 1.5]
ANE1	BBI1	ANE	BBI	ANE1BBI1	Glucose	-10	0.0520262	0.0118567	0.0319415	0.0118567	0.0520262	1.32145	(1, 1.5]
ANE1	BBI1	ANE	BBI	ANE1BBI1	Glycerol	-10	0.0364158	-0.0628554	-0.0132198	-0.0628554	0.0364158	1.32145	(1, 1.5]
ANE1	BAK1	ANE	BAK	ANE1BAK1	Glu+Sorbitol	0.00963245	-1	0.0545167	-0.472742	-1	0.0545167	1.18959	(1, 1.5]
ANE1	BAK1	ANE	BAK	ANE1BAK1	Glucose	0.0750051	0.0520262	0.0639478	0.057987	0.0520262	0.0639478	1.18959	(1, 1.5]
ANE1	BAK1	ANE	BAK	ANE1BAK1	Glycerol	0.179472	0.0364158	-0.00177197	0.0173219	-0.00177197	0.0364158	1.18959	(1, 1.5]
ANE1	BEH1	ANE	BEH	ANE1BEH1	Glu+Sorbitol	-10	-1	0.114205	-0.442898	-1	0.114205	0.897873	(0.5,1]
ANE1	BEH1	ANE	BEH	ANE1BEH1	Glucose	-10	0.0520262	-0.0314472	0.0102895	-0.0314472	0.0520262	0.897873	(0.5,1]
ANE1	BEH1	ANE	BEH	ANE1BEH1	Glycerol	-10	0.0364158	-1	-0.481792	-1	0.0364158	0.897873	(0.5,1]
ANE1	BLA1	ANE	BLA	ANE1BLA1	Glu+Sorbitol	-0.144993	-1	-10	-5.5	-10	-1	1.32636	(1, 1.5]
ANE1	BLA1	ANE	BLA	ANE1BLA1	Glucose	0.0382896	0.0520262	-10	-4.97399	-10	0.0520262	1.32636	(1, 1.5]
ANE1	BLA1	ANE	BLA	ANE1BLA1	Glycerol	0.101579	0.0364158	-10	-4.98179	-10	0.0364158	1.32636	(1, 1.5]
ANE1	BHM1	ANE	BHM	ANE1BHM1	Glu+Sorbitol	-10	-1	-1	-1	-1	-1	1.30218	(1, 1.5]
ANE1	BHM1	ANE	BHM	ANE1BHM1	Glucose	-10	0.0520262	-10	-4.97399	-10	0.0520262	1.30218	(1, 1.5]
ANE1	BHM1	ANE	BHM	ANE1BHM1	Glycerol	-10	0.0364158	-1	-0.481792	-1	0.0364158	1.30218	(1, 1.5]
ANE1	BHN1	ANE	BHN	ANE1BHN1	Glu+Sorbitol	-10	-1	0.00750642	-0.496247	-1	0.00750642	1.31701	(1, 1.5]
ANE1	BHN1	ANE	BHN	ANE1BHN1	Glucose	0.0636846	0.0520262	-1	-0.473987	-1	0.0520262	1.31701	(1, 1.5]
ANE1	BHN1	ANE	BHN	ANE1BHN1	Glycerol	0.091689	0.0364158	-1	-0.481792	-1	0.0364158	1.31701	(1, 1.5]
ANE1	BHB1	ANE	BHB	ANE1BHB1	Glu+Sorbitol	-0.0116996	-1	-1	-1	-1	-1	1.32193	(1, 1.5]
ANE1	BHB1	ANE	BHB	ANE1BHB1	Glucose	-0.0244103	0.0520262	-10	-4.97399	-10	0.0520262	1.32193	(1, 1.5]
ANE1	BHB1	ANE	BHB	ANE1BHB1	Glycerol	-10	0.0364158	-10	-4.98179	-10	0.0364158	1.32193	(1, 1.5]
ANE1	BLE1	ANE	BLE	ANE1BLE1	Glu+Sorbitol	-10	-1	-1	-1	-1	-1	1.32683	(1, 1.5]
ANE1	BLE1	ANE	BLE	ANE1BLE1	Glucose	-10	0.0520262	-0.0748489	-0.0114114	-0.0748489	0.0520262	1.32683	(1, 1.5]
ANE1	BLE1	ANE	BLE	ANE1BLE1	Glycerol	0.0945214	0.0364158	-0.044381	-0.00398261	-0.044381	0.0364158	1.32683	(1, 1.5]
ANE1	BHF1	ANE	BHF	ANE1BHF1	Glu+Sorbitol	-1	-1	0.0591106	-0.470445	-1	0.0591106	1.31621	(1, 1.5]
ANE1	BHF1	ANE	BHF	ANE1BHF1	Glucose	0.092409	0.0520262	0.0612509	0.0566385	0.0520262	0.0612509	1.31621	(1, 1.5]
ANE1	BHF1	ANE	BHF	ANE1BHF1	Glycerol	0.111316	0.0364158	0.0945635	0.0654896	0.0364158	0.0945635	1.31621	(1, 1.5]
ANE1	BKR1	ANE	BKR	ANE1BKR1	Glu+Sorbitol	-0.0244694	-1	-1	-1	-1	-1	1.32574	(1, 1.5]
ANE1	BKR1	ANE	BKR	ANE1BKR1	Glucose	-0.0282514	0.0520262	-0.013402	0.0193121	-0.013402	0.0520262	1.32574	(1, 1.5]
ANE1	BKR1	ANE	BKR	ANE1BKR1	Glycerol	0.099239	0.0364158	-1	-0.481792	-1	0.0364158	1.32574	(1, 1.5]
ANE1	BLL1	ANE	BLL	ANE1BLL1	Glu+Sorbitol	-1	-1	-1	-1	-1	-1	1.32909	(1, 1.5]
ANE1	BLL1	ANE	BLL	ANE1BLL1	Glucose	0.0461481	0.0520262	-1	-0.473987	-1	0.0520262	1.32909	(1, 1.5]
ANE1	BLL1	ANE	BLL	ANE1BLL1	Glycerol	0.146029	0.0364158	0.120353	0.0783846	0.0364158	0.120353	1.32909	(1, 1.5]
ANE1	BNI1	ANE	BNI	ANE1BNI1	Glu+Sorbitol	-10	-1	-10	-1	-1	-1	1.32715	(1, 1.5]
ANE1	BNI1	ANE	BNI	ANE1BNI1	Glucose	-10	0.0520262	-10	0.0520262	0.0520262	0.0520262	1.32715	(1, 1.5]
ANE1	BNI1	ANE	BNI	ANE1BNI1	Glycerol	-10	0.0364158	-10	0.0364158	0.0364158	0.0364158	1.32715	(1, 1.5]
ANE1	BQG1	ANE	BQG	ANE1BQG1	Glu+Sorbitol	0.129898	-1	0.133013	-0.433494	-1	0.133013	1.32582	(1, 1.5]
ANE1	BQG1	ANE	BQG	ANE1BQG1	Glucose	0.0838204	0.0520262	-0.0571925	-0.00258314	-0.0571925	0.0520262	1.32582	(1, 1.5]
ANE1	BQG1	ANE	BQG	ANE1BQG1	Glycerol	0.125758	0.0364158	0.0537228	0.0450693	0.0364158	0.0537228	1.32582	(1, 1.5]
ANE1	BNK1	ANE	BNK	ANE1BNK1	Glu+Sorbitol	-0.131721	-1	-1	-1	-1	-1	1.32632	(1, 1.5]
ANE1	BNK1	ANE	BNK	ANE1BNK1	Glucose	0.0549384	0.0520262	-0.0796816	-0.0138277	-0.0796816	0.0520262	1.32632	(1, 1.5]
ANE1	BNK1	ANE	BNK	ANE1BNK1	Glycerol	0.1312	0.0364158	0.115878	0.0761469	0.0364158	0.115878	1.32632	(1, 1.5]
ANE1	BPQ1	ANE	BPQ	ANE1BPQ1	Glu+Sorbitol	0.151707	-1	0.196057	-0.401972	-1	0.196057	1.31471	(1, 1.5]
ANE1	BPQ1	ANE	BPQ	ANE1BPQ1	Glucose	0.0866618	0.0520262	0.00714221	0.0295842	0.00714221	0.0520262	1.31471	(1, 1.5]
ANE1	BPQ1	ANE	BPQ	ANE1BPQ1	Glycerol	0.0932632	0.0364158	0.0632255	0.0498206	0.0364158	0.0632255	1.31471	(1, 1.5]
ANE1	BQH1	ANE	BQH	ANE1BQH1	Glu+Sorbitol	-10	-1	0.00347705	-0.498261	-1	0.00347705	1.32937	(1, 1.5]
ANE1	BQH1	ANE	BQH	ANE1BQH1	Glucose	-10	0.0520262	0.0201877	0.036107	0.0201877	0.0520262	1.32937	(1, 1.5]
ANE1	BQH1	ANE	BQH	ANE1BQH1	Glycerol	0.154796	0.0364158	-1	-0.481792	-1	0.0364158	1.32937	(1, 1.5]
ANE1	BRA1	ANE	BRA	ANE1BRA1	Glu+Sorbitol	-10	-1	0.0670496	-0.466475	-1	0.0670496	1.32094	(1, 1.5]
ANE1	BRA1	ANE	BRA	ANE1BRA1	Glucose	0.0408779	0.0520262	-0.0988197	-0.0233967	-0.0988197	0.0520262	1.32094	(1, 1.5]
ANE1	BRA1	ANE	BRA	ANE1BRA1	Glycerol	-10	0.0364158	-1	-0.481792	-1	0.0364158	1.32094	(1, 1.5]
ANE1	BLN1	ANE	BLN	ANE1BLN1	Glu+Sorbitol	-10	-1	-10	-1	-1	-1	1.32909	(1, 1.5]
ANE1	BLN1	ANE	BLN	ANE1BLN1	Glucose	-10	0.0520262	-10	0.0520262	0.0520262	0.0520262	1.32909	(1, 1.5]
ANE1	BLN1	ANE	BLN	ANE1BLN1	Glycerol	-10	0.0364158	-10	0.0364158	0.0364158	0.0364158	1.32909	(1, 1.5]
ANE1	BQI1	ANE	BQI	ANE1BQI1	Glu+Sorbitol	0.148772	-1	0.143956	-0.428022	-1	0.143956	1.32725	(1, 1.5]
ANE1	BQI1	ANE	BQI	ANE1BQI1	Glucose	0.0689219	0.0520262	-0.108288	-0.0281309	-0.108288	0.0520262	1.32725	(1, 1.5]
ANE1	BQI1	ANE	BQI	ANE1BQI1	Glycerol	0.181632	0.0364158	-0.01173	0.0123429	-0.01173	0.0364158	1.32725	(1, 1.5]
ANE1	BRB1	ANE	BRB	ANE1BRB1	Glu+Sorbitol	0.0789977	-1	0.109832	-0.445084	-1	0.109832	1.30586	(1, 1.5]
ANE1	BRB1	ANE	BRB	ANE1BRB1	Glucose	0.0886198	0.0520262	0.0350566	0.0435414	0.0350566	0.0520262	1.30586	(1, 1.5]
ANE1	BRB1	ANE	BRB	ANE1BRB1	Glycerol	0.0835518	0.0364158	0.000627839	0.0185218	0.000627839	0.0364158	1.30586	(1, 1.5]
ANE1	BLP1	ANE	BLP	ANE1BLP1	Glu+Sorbitol	0.122269	-1	0.159343	-0.420328	-1	0.159343	1.32921	(1, 1.5]
ANE1	BLP1	ANE	BLP	ANE1BLP1	Glucose	0.066293	0.0520262	0.0477277	0.0498769	0.0477277	0.0520262	1.32921	(1, 1.5]
ANE1	BLP1	ANE	BLP	ANE1BLP1	Glycerol	0.143943	0.0364158	0.0191829	0.0277993	0.0191829	0.0364158	1.32921	(1, 1.5]
ANE1	BRC1	ANE	BRC	ANE1BRC1	Glu+Sorbitol	-0.0386699	-1	0.107766	-0.446117	-1	0.107766	1.31502	(1, 1.5]
ANE1	BRC1	ANE	BRC	ANE1BRC1	Glucose	0.070851	0.0520262	-0.0843597	-0.0161667	-0.0843597	0.0520262	1.31502	(1, 1.5]
ANE1	BRC1	ANE	BRC	ANE1BRC1	Glycerol	0.113892	0.0364158	-0.0845599	-0.0240721	-0.0845599	0.0364158	1.31502	(1, 1.5]
ANE1	BPT1	ANE	BPT	ANE1BPT1	Glu+Sorbitol	-0.016395	-1	0.0437225	-0.478139	-1	0.0437225	1.32503	(1, 1.5]
ANE1	BPT1	ANE	BPT	ANE1BPT1	Glucose	0.0478294	0.0520262	-0.0226414	0.0146924	-0.0226414	0.0520262	1.32503	(1, 1.5]
ANE1	BPT1	ANE	BPT	ANE1BPT1	Glycerol	0.124016	0.0364158	0.0527905	0.0446032	0.0364158	0.0527905	1.32503	(1, 1.5]
ANE1	BRD1	ANE	BRD	ANE1BRD1	Glu+Sorbitol	-0.0238508	-1	0.0462453	-0.476877	-1	0.0462453	1.32564	(1, 1.5]
ANE1	BRD1	ANE	BRD	ANE1BRD1	Glucose	0.0890736	0.0520262	-0.0248454	0.0135904	-0.0248454	0.0520262	1.32564	(1, 1.5]
ANE1	BRD1	ANE	BRD	ANE1BRD1	Glycerol	0.166146	0.0364158	0.10436	0.070388	0.0364158	0.10436	1.32564	(1, 1.5]
ANE1	BMK1	ANE	BMK	ANE1BMK1	Glu+Sorbitol	0.0504968	-1	0.10245	-0.448775	-1	0.10245	1.32689	(1, 1.5]
ANE1	BMK1	ANE	BMK	ANE1BMK1	Glucose	0.0781685	0.0520262	0.0206207	0.0363235	0.0206207	0.0520262	1.32689	(1, 1.5]
ANE1	BMK1	ANE	BMK	ANE1BMK1	Glycerol	0.14135	0.0364158	0.0727937	0.0546047	0.0364158	0.0727937	1.32689	(1, 1.5]
ANE1	BQP1	ANE	BQP	ANE1BQP1	Glu+Sorbitol	-0.123835	-1	0.108223	-0.445888	-1	0.108223	1.3074	(1, 1.5]
ANE1	BQP1	ANE	BQP	ANE1BQP1	Glucose	-0.020216	0.0520262	0.0119541	0.0319901	0.0119541	0.0520262	1.3074	(1, 1.5]
ANE1	BQP1	ANE	BQP	ANE1BQP1	Glycerol	0.110267	0.0364158	-0.0301991	0.00310833	-0.0301991	0.0364158	1.3074	(1, 1.5]
ANE1	BLV1	ANE	BLV	ANE1BLV1	Glu+Sorbitol	0.0680412	-1	0.148788	-0.425606	-1	0.148788	1.3257	(1, 1.5]
ANE1	BLV1	ANE	BLV	ANE1BLV1	Glucose	0.0272973	0.0520262	-0.0681483	-0.00806102	-0.0681483	0.0520262	1.3257	(1, 1.5]
ANE1	BLV1	ANE	BLV	ANE1BLV1	Glycerol	0.133239	0.0364158	0.0838921	0.0601539	0.0364158	0.0838921	1.3257	(1, 1.5]
ANE1	BQQ1	ANE	BQQ	ANE1BQQ1	Glu+Sorbitol	-10	-1	0.0432009	-0.4784	-1	0.0432009	1.32499	(1, 1.5]
ANE1	BQQ1	ANE	BQQ	ANE1BQQ1	Glucose	0.0586395	0.0520262	0.0291802	0.0406032	0.0291802	0.0520262	1.32499	(1, 1.5]
ANE1	BQQ1	ANE	BQQ	ANE1BQQ1	Glycerol	0.104648	0.0364158	0.0824425	0.0594292	0.0364158	0.0824425	1.32499	(1, 1.5]
ANE1	BMA1	ANE	BMA	ANE1BMA1	Glu+Sorbitol	-10	-1	0.0267219	-0.486639	-1	0.0267219	1.18798	(1, 1.5]
ANE1	BMA1	ANE	BMA	ANE1BMA1	Glucose	-10	0.0520262	0.0277247	0.0398755	0.0277247	0.0520262	1.18798	(1, 1.5]
ANE1	BMA1	ANE	BMA	ANE1BMA1	Glycerol	0.139208	0.0364158	0.0885346	0.0624752	0.0364158	0.0885346	1.18798	(1, 1.5]
ANE1	BQR1	ANE	BQR	ANE1BQR1	Glu+Sorbitol	-10	-1	0.0524282	-0.473786	-1	0.0524282	1.32563	(1, 1.5]
ANE1	BQR1	ANE	BQR	ANE1BQR1	Glucose	0.0715636	0.0520262	-0.0545715	-0.00127266	-0.0545715	0.0520262	1.32563	(1, 1.5]
ANE1	BQR1	ANE	BQR	ANE1BQR1	Glycerol	0.147907	0.0364158	0.0588489	0.0476323	0.0364158	0.0588489	1.32563	(1, 1.5]
ANE1	CAD1	ANE	CAD	ANE1CAD1	Glu+Sorbitol	-10	-1	0.0934632	-0.453268	-1	0.0934632	1.35227	(1, 1.5]
ANE1	CAD1	ANE	CAD	ANE1CAD1	Glucose	-10	0.0520262	-0.0194773	0.0162744	-0.0194773	0.0520262	1.35227	(1, 1.5]
ANE1	CAD1	ANE	CAD	ANE1CAD1	Glycerol	-10	0.0364158	-10	-4.98179	-10	0.0364158	1.35227	(1, 1.5]
ANE1	BSB1	ANE	BSB	ANE1BSB1	Glu+Sorbitol	-10	-1	-10	-5.5	-10	-1	1.32354	(1, 1.5]
ANE1	BSB1	ANE	BSB	ANE1BSB1	Glucose	-10	0.0520262	-10	0.0520262	0.0520262	0.0520262	1.32354	(1, 1.5]
ANE1	BSB1	ANE	BSB	ANE1BSB1	Glycerol	-10	0.0364158	-10	0.0364158	0.0364158	0.0364158	1.32354	(1, 1.5]
ANE1	BTH1	ANE	BTH	ANE1BTH1	Glu+Sorbitol	-10	-1	0.0555657	-0.472217	-1	0.0555657	1.319	(1, 1.5]
ANE1	BTH1	ANE	BTH	ANE1BTH1	Glucose	-0.00850148	0.0520262	-0.01391	0.0190581	-0.01391	0.0520262	1.319	(1, 1.5]
ANE1	BTH1	ANE	BTH	ANE1BTH1	Glycerol	-10	0.0364158	-1	-0.481792	-1	0.0364158	1.319	(1, 1.5]
ANE1	AHP1	ANE	AHP	ANE1AHP1	Glu+Sorbitol	-10	-1	-1	-1	-1	-1	1.35866	(1, 1.5]
ANE1	AHP1	ANE	AHP	ANE1AHP1	Glucose	-10	0.0520262	-1	-0.473987	-1	0.0520262	1.35866	(1, 1.5]
ANE1	AHP1	ANE	AHP	ANE1AHP1	Glycerol	0.130564	0.0364158	0.0888156	0.0626157	0.0364158	0.0888156	1.35866	(1, 1.5]
ANE1	CQD1	ANE	CQD	ANE1CQD1	Glu+Sorbitol	-10	-1	0.0454048	-0.477298	-1	0.0454048	1.13357	(1, 1.5]
ANE1	CQD1	ANE	CQD	ANE1CQD1	Glucose	0.0643121	0.0520262	0.0106465	0.0313364	0.0106465	0.0520262	1.13357	(1, 1.5]
ANE1	CQD1	ANE	CQD	ANE1CQD1	Glycerol	-10	0.0364158	-10	-4.98179	-10	0.0364158	1.13357	(1, 1.5]
ANE1	APV1	ANE	APV	ANE1APV1	Glu+Sorbitol	0.0467239	-1	0.0394829	-0.480259	-1	0.0394829	1.32566	(1, 1.5]
ANE1	APV1	ANE	APV	ANE1APV1	Glucose	0.0574093	0.0520262	-0.0613302	-0.00465199	-0.0613302	0.0520262	1.32566	(1, 1.5]
ANE1	APV1	ANE	APV	ANE1APV1	Glycerol	0.0703671	0.0364158	0.176787	0.106601	0.0364158	0.176787	1.32566	(1, 1.5]
ANE1	AST1	ANE	AST	ANE1AST1	Glu+Sorbitol	0.0214503	-1	-1	-1	-1	-1	1.25595	(1, 1.5]
ANE1	AST1	ANE	AST	ANE1AST1	Glucose	0.069662	0.0520262	0.0143308	0.0331785	0.0143308	0.0520262	1.25595	(1, 1.5]
ANE1	AST1	ANE	AST	ANE1AST1	Glycerol	0.0712002	0.0364158	-1	-0.481792	-1	0.0364158	1.25595	(1, 1.5]
ANE1	CCV1	ANE	CCV	ANE1CCV1	Glu+Sorbitol	-10	-1	0.107101	-0.44645	-1	0.107101	0.926585	(0.5,1]
ANE1	CCV1	ANE	CCV	ANE1CCV1	Glucose	0.0203277	0.0520262	0.044604	0.0483151	0.044604	0.0520262	0.926585	(0.5,1]
ANE1	CCV1	ANE	CCV	ANE1CCV1	Glycerol	0.104092	0.0364158	-1	-0.481792	-1	0.0364158	0.926585	(0.5,1]
ANE1	YAR1	ANE	YAR	ANE1YAR1	Glu+Sorbitol	-10	-1	-1	-1	-1	-1	1.09921	(0.5,1]
ANE1	YAR1	ANE	YAR	ANE1YAR1	Glucose	0.0658382	0.0520262	-0.0705407	-0.00925726	-0.0705407	0.0520262	1.09921	(0.5,1]
ANE1	YAR1	ANE	YAR	ANE1YAR1	Glycerol	0.154118	0.0364158	-1	-0.481792	-1	0.0364158	1.09921	(0.5,1]
ANE1	YBU1	ANE	YBU	ANE1YBU1	Glu+Sorbitol	-10	-1	-1	-1	-1	-1	1.05433	(0.5,1]
ANE1	YBU1	ANE	YBU	ANE1YBU1	Glucose	-10	0.0520262	-10	-4.97399	-10	0.0520262	1.05433	(0.5,1]
ANE1	YBU1	ANE	YBU	ANE1YBU1	Glycerol	-10	0.0364158	-1	-0.481792	-1	0.0364158	1.05433	(0.5,1]
BBI1	AKB1	BBI	AKB	BBI1AKB1	Glu+Sorbitol	0.0866218	0.0796151	0.139707	0.109661	0.0796151	0.139707	1.53206	(1, 1.5]
BBI1	AKB1	BBI	AKB	BBI1AKB1	Glucose	0.0456816	0.0180246	-0.0154866	0.00126901	-0.0154866	0.0180246	1.53206	(1, 1.5]
BBI1	AKB1	BBI	AKB	BBI1AKB1	Glycerol	-10	-10	-1	-5.5	-10	-1	1.53206	(1, 1.5]
BBI1	AKP1	BBI	AKP	BBI1AKP1	Glu+Sorbitol	0.00715043	0.0796151	0.0982963	0.0889557	0.0796151	0.0982963	0.199193	(0.05,0.5]
BBI1	AKP1	BBI	AKP	BBI1AKP1	Glucose	0.0494412	0.0180246	-0.0557565	-0.0188659	-0.0557565	0.0180246	0.199193	(0.05,0.5]
BBI1	AKP1	BBI	AKP	BBI1AKP1	Glycerol	-10	-10	-0.109008	-5.0545	-10	-0.109008	0.199193	(0.05,0.5]
BBI1	ALG1	BBI	ALG	BBI1ALG1	Glu+Sorbitol	-10	0.0796151	0.0868454	0.0832302	0.0796151	0.0868454	0.774873	(0.5,1]
BBI1	ALG1	BBI	ALG	BBI1ALG1	Glucose	-10	0.0180246	-0.141619	-0.061797	-0.141619	0.0180246	0.774873	(0.5,1]
BBI1	ALG1	BBI	ALG	BBI1ALG1	Glycerol	-10	-10	-0.0464457	-5.02322	-10	-0.0464457	0.774873	(0.5,1]
BBI1	ANG1	BBI	ANG	BBI1ANG1	Glu+Sorbitol	-10	0.0796151	0.0628167	0.0712159	0.0628167	0.0796151	1.32196	(1, 1.5]
BBI1	ANG1	BBI	ANG	BBI1ANG1	Glucose	-10	0.0180246	0.0663533	0.042189	0.0180246	0.0663533	1.32196	(1, 1.5]
BBI1	ANG1	BBI	ANG	BBI1ANG1	Glycerol	-10	-10	-1	-5.5	-10	-1	1.32196	(1, 1.5]
BBI1	AIM1	BBI	AIM	BBI1AIM1	Glu+Sorbitol	-10	0.0796151	-1	-0.460192	-1	0.0796151	0.276647	(0.05,0.5]
BBI1	AIM1	BBI	AIM	BBI1AIM1	Glucose	-10	0.0180246	-10	-4.99099	-10	0.0180246	0.276647	(0.05,0.5]
BBI1	AIM1	BBI	AIM	BBI1AIM1	Glycerol	-10	-10	-10	-10	-10	-10	0.276647	(0.05,0.5]
BBI1	AKV1	BBI	AKV	BBI1AKV1	Glu+Sorbitol	0.0195949	0.0796151	0.0943177	0.0869664	0.0796151	0.0943177	0.199294	(0.05,0.5]
BBI1	AKV1	BBI	AKV	BBI1AKV1	Glucose	0.0354492	0.0180246	-0.033945	-0.00796019	-0.033945	0.0180246	0.199294	(0.05,0.5]
BBI1	AKV1	BBI	AKV	BBI1AKV1	Glycerol	-10	-10	-0.0735332	-5.03677	-10	-0.0735332	0.199294	(0.05,0.5]
BBI1	BBI1	BBI	BBI	BBI1BBI1	Glu+Sorbitol	-10	0.0796151	0.242166	0.16089	0.0796151	0.242166	0	(0,0.05]
BBI1	BBI1	BBI	BBI	BBI1BBI1	Glucose	-10	0.0180246	0.0118567	0.0149407	0.0118567	0.0180246	0	(0,0.05]
BBI1	BBI1	BBI	BBI	BBI1BBI1	Glycerol	-10	-10	-0.0628554	-5.03143	-10	-0.0628554	0	(0,0.05]
BBI1	BAK1	BBI	BAK	BBI1BAK1	Glu+Sorbitol	0.12355	0.0796151	0.0545167	0.0670659	0.0545167	0.0796151	1.46368	(1, 1.5]
BBI1	BAK1	BBI	BAK	BBI1BAK1	Glucose	0.0801262	0.0180246	0.0639478	0.0409862	0.0180246	0.0639478	1.46368	(1, 1.5]
BBI1	BAK1	BBI	BAK	BBI1BAK1	Glycerol	0.0462577	-10	-0.00177197	-5.00089	-10	-0.00177197	1.46368	(1, 1.5]
BBI1	BEH1	BBI	BEH	BBI1BEH1	Glu+Sorbitol	-10	0.0796151	0.114205	0.0969099	0.0796151	0.114205	1.45978	(1, 1.5]
BBI1	BEH1	BBI	BEH	BBI1BEH1	Glucose	-10	0.0180246	-0.0314472	-0.00671131	-0.0314472	0.0180246	1.45978	(1, 1.5]
BBI1	BEH1	BBI	BEH	BBI1BEH1	Glycerol	-10	-10	-1	-5.5	-10	-1	1.45978	(1, 1.5]
BBI1	BLA1	BBI	BLA	BBI1BLA1	Glu+Sorbitol	-0.0748959	0.0796151	-10	-4.96019	-10	0.0796151	0.171432	(0.05,0.5]
BBI1	BLA1	BBI	BLA	BBI1BLA1	Glucose	0.00518447	0.0180246	-10	-4.99099	-10	0.0180246	0.171432	(0.05,0.5]
BBI1	BLA1	BBI	BLA	BBI1BLA1	Glycerol	-10	-10	-10	-10	-10	-10	0.171432	(0.05,0.5]
BBI1	BHM1	BBI	BHM	BBI1BHM1	Glu+Sorbitol	-10	0.0796151	-1	-0.460192	-1	0.0796151	0.27455	(0.05,0.5]
BBI1	BHM1	BBI	BHM	BBI1BHM1	Glucose	-10	0.0180246	-10	-4.99099	-10	0.0180246	0.27455	(0.05,0.5]
BBI1	BHM1	BBI	BHM	BBI1BHM1	Glycerol	-10	-10	-1	-5.5	-10	-1	0.27455	(0.05,0.5]
BBI1	BHN1	BBI	BHN	BBI1BHN1	Glu+Sorbitol	-0.00947209	0.0796151	0.00750642	0.0435607	0.00750642	0.0796151	0.211023	(0.05,0.5]
BBI1	BHN1	BBI	BHN	BBI1BHN1	Glucose	0.00728482	0.0180246	-1	-0.490988	-1	0.0180246	0.211023	(0.05,0.5]
BBI1	BHN1	BBI	BHN	BBI1BHN1	Glycerol	-10	-10	-1	-5.5	-10	-1	0.211023	(0.05,0.5]
BBI1	BHB1	BBI	BHB	BBI1BHB1	Glu+Sorbitol	-0.0816952	0.0796151	-1	-0.460192	-1	0.0796151	0.284021	(0.05,0.5]
BBI1	BHB1	BBI	BHB	BBI1BHB1	Glucose	-0.0969443	0.0180246	-10	-4.99099	-10	0.0180246	0.284021	(0.05,0.5]
BBI1	BHB1	BBI	BHB	BBI1BHB1	Glycerol	-10	-10	-10	-10	-10	-10	0.284021	(0.05,0.5]
BBI1	BLE1	BBI	BLE	BBI1BLE1	Glu+Sorbitol	0.0545269	0.0796151	-1	-0.460192	-1	0.0796151	0.197541	(0.05,0.5]
BBI1	BLE1	BBI	BLE	BBI1BLE1	Glucose	0.0428708	0.0180246	-0.0748489	-0.0284121	-0.0748489	0.0180246	0.197541	(0.05,0.5]
BBI1	BLE1	BBI	BLE	BBI1BLE1	Glycerol	-0.108246	-10	-0.044381	-5.02219	-10	-0.044381	0.197541	(0.05,0.5]
BBI1	BHF1	BBI	BHF	BBI1BHF1	Glu+Sorbitol	0.00299976	0.0796151	0.0591106	0.0693628	0.0591106	0.0796151	0.181098	(0.05,0.5]
BBI1	BHF1	BBI	BHF	BBI1BHF1	Glucose	0.0276229	0.0180246	0.0612509	0.0396377	0.0180246	0.0612509	0.181098	(0.05,0.5]
BBI1	BHF1	BBI	BHF	BBI1BHF1	Glycerol	-10	-10	0.0945635	-4.95272	-10	0.0945635	0.181098	(0.05,0.5]
BBI1	BKR1	BBI	BKR	BBI1BKR1	Glu+Sorbitol	0.00765899	0.0796151	-1	-0.460192	-1	0.0796151	0.197328	(0.05,0.5]
BBI1	BKR1	BBI	BKR	BBI1BKR1	Glucose	-0.0692314	0.0180246	-0.013402	0.00231129	-0.013402	0.0180246	0.197328	(0.05,0.5]
BBI1	BKR1	BBI	BKR	BBI1BKR1	Glycerol	-10	-10	-1	-5.5	-10	-1	0.197328	(0.05,0.5]
BBI1	BLL1	BBI	BLL	BBI1BLL1	Glu+Sorbitol	-0.0266943	0.0796151	-1	-0.460192	-1	0.0796151	0.199364	(0.05,0.5]
BBI1	BLL1	BBI	BLL	BBI1BLL1	Glucose	-0.00169169	0.0180246	-1	-0.490988	-1	0.0180246	0.199364	(0.05,0.5]
BBI1	BLL1	BBI	BLL	BBI1BLL1	Glycerol	-0.102518	-10	0.120353	-4.93982	-10	0.120353	0.199364	(0.05,0.5]
BBI1	BNI1	BBI	BNI	BBI1BNI1	Glu+Sorbitol	-10	0.0796151	-10	0.0796151	0.0796151	0.0796151	0.196075	(0.05,0.5]
BBI1	BNI1	BBI	BNI	BBI1BNI1	Glucose	0.0156818	0.0180246	-10	0.0180246	0.0180246	0.0180246	0.196075	(0.05,0.5]
BBI1	BNI1	BBI	BNI	BBI1BNI1	Glycerol	-10	-10	-10	-10	-10	-10	0.196075	(0.05,0.5]
BBI1	BQG1	BBI	BQG	BBI1BQG1	Glu+Sorbitol	0.0996411	0.0796151	0.133013	0.106314	0.0796151	0.133013	0.194559	(0.05,0.5]
BBI1	BQG1	BBI	BQG	BBI1BQG1	Glucose	0.00696881	0.0180246	-0.0571925	-0.0195839	-0.0571925	0.0180246	0.194559	(0.05,0.5]
BBI1	BQG1	BBI	BQG	BBI1BQG1	Glycerol	-1	-10	0.0537228	-4.97314	-10	0.0537228	0.194559	(0.05,0.5]
BBI1	BNK1	BBI	BNK	BBI1BNK1	Glu+Sorbitol	0.064912	0.0796151	-1	-0.460192	-1	0.0796151	0.186794	(0.05,0.5]
BBI1	BNK1	BBI	BNK	BBI1BNK1	Glucose	0.0373155	0.0180246	-0.0796816	-0.0308285	-0.0796816	0.0180246	0.186794	(0.05,0.5]
BBI1	BNK1	BBI	BNK	BBI1BNK1	Glycerol	-1	-10	0.115878	-4.94206	-10	0.115878	0.186794	(0.05,0.5]
BBI1	BPQ1	BBI	BPQ	BBI1BPQ1	Glu+Sorbitol	0.0253754	0.0796151	0.196057	0.137836	0.0796151	0.196057	0.161009	(0.05,0.5]
BBI1	BPQ1	BBI	BPQ	BBI1BPQ1	Glucose	0.0428446	0.0180246	0.00714221	0.0125834	0.00714221	0.0180246	0.161009	(0.05,0.5]
BBI1	BPQ1	BBI	BPQ	BBI1BPQ1	Glycerol	-0.148805	-10	0.0632255	-4.96839	-10	0.0632255	0.161009	(0.05,0.5]
BBI1	BQH1	BBI	BQH	BBI1BQH1	Glu+Sorbitol	-1	0.0796151	0.00347705	0.0415461	0.00347705	0.0796151	0.193209	(0.05,0.5]
BBI1	BQH1	BBI	BQH	BBI1BQH1	Glucose	-0.0296397	0.0180246	0.0201877	0.0191062	0.0180246	0.0201877	0.193209	(0.05,0.5]
BBI1	BQH1	BBI	BQH	BBI1BQH1	Glycerol	-10	-10	-1	-5.5	-10	-1	0.193209	(0.05,0.5]
BBI1	BRA1	BBI	BRA	BBI1BRA1	Glu+Sorbitol	-0.0830759	0.0796151	0.0670496	0.0733324	0.0670496	0.0796151	0.210163	(0.05,0.5]
BBI1	BRA1	BBI	BRA	BBI1BRA1	Glucose	0.0122596	0.0180246	-0.0988197	-0.0403975	-0.0988197	0.0180246	0.210163	(0.05,0.5]
BBI1	BRA1	BBI	BRA	BBI1BRA1	Glycerol	-10	-10	-1	-5.5	-10	-1	0.210163	(0.05,0.5]
BBI1	BLN1	BBI	BLN	BBI1BLN1	Glu+Sorbitol	-10	0.0796151	-10	0.0796151	0.0796151	0.0796151	0.192501	(0.05,0.5]
BBI1	BLN1	BBI	BLN	BBI1BLN1	Glucose	-10	0.0180246	-10	0.0180246	0.0180246	0.0180246	0.192501	(0.05,0.5]
BBI1	BLN1	BBI	BLN	BBI1BLN1	Glycerol	-10	-10	-10	-10	-10	-10	0.192501	(0.05,0.5]
BBI1	BQI1	BBI	BQI	BBI1BQI1	Glu+Sorbitol	0.0528552	0.0796151	0.143956	0.111786	0.0796151	0.143956	0.189564	(0.05,0.5]
BBI1	BQI1	BBI	BQI	BBI1BQI1	Glucose	-0.0220182	0.0180246	-0.108288	-0.0451317	-0.108288	0.0180246	0.189564	(0.05,0.5]
BBI1	BQI1	BBI	BQI	BBI1BQI1	Glycerol	-10	-10	-0.01173	-5.00587	-10	-0.01173	0.189564	(0.05,0.5]
BBI1	BRB1	BBI	BRB	BBI1BRB1	Glu+Sorbitol	0.035536	0.0796151	0.109832	0.0947237	0.0796151	0.109832	0.268714	(0.05,0.5]
BBI1	BRB1	BBI	BRB	BBI1BRB1	Glucose	0.0268486	0.0180246	0.0350566	0.0265406	0.0180246	0.0350566	0.268714	(0.05,0.5]
BBI1	BRB1	BBI	BRB	BBI1BRB1	Glycerol	-0.115835	-10	0.000627839	-4.99969	-10	0.000627839	0.268714	(0.05,0.5]
BBI1	BLP1	BBI	BLP	BBI1BLP1	Glu+Sorbitol	0.0609063	0.0796151	0.159343	0.119479	0.0796151	0.159343	0.193392	(0.05,0.5]
BBI1	BLP1	BBI	BLP	BBI1BLP1	Glucose	0.0172467	0.0180246	0.0477277	0.0328761	0.0180246	0.0477277	0.193392	(0.05,0.5]
BBI1	BLP1	BBI	BLP	BBI1BLP1	Glycerol	-0.0913553	-10	0.0191829	-4.99041	-10	0.0191829	0.193392	(0.05,0.5]
BBI1	BRC1	BBI	BRC	BBI1BRC1	Glu+Sorbitol	-0.0734153	0.0796151	0.107766	0.0936904	0.0796151	0.107766	0.156127	(0.05,0.5]
BBI1	BRC1	BBI	BRC	BBI1BRC1	Glucose	0.0211184	0.0180246	-0.0843597	-0.0331675	-0.0843597	0.0180246	0.156127	(0.05,0.5]
BBI1	BRC1	BBI	BRC	BBI1BRC1	Glycerol	-1	-10	-0.0845599	-5.04228	-10	-0.0845599	0.156127	(0.05,0.5]
BBI1	BPT1	BBI	BPT	BBI1BPT1	Glu+Sorbitol	0.0138193	0.0796151	0.0437225	0.0616688	0.0437225	0.0796151	0.180367	(0.05,0.5]
BBI1	BPT1	BBI	BPT	BBI1BPT1	Glucose	0.00492833	0.0180246	-0.0226414	-0.00230838	-0.0226414	0.0180246	0.180367	(0.05,0.5]
BBI1	BPT1	BBI	BPT	BBI1BPT1	Glycerol	-0.0478767	-10	0.0527905	-4.9736	-10	0.0527905	0.180367	(0.05,0.5]
BBI1	BRD1	BBI	BRD	BBI1BRD1	Glu+Sorbitol	0.00331745	0.0796151	0.0462453	0.0629302	0.0462453	0.0796151	0.181373	(0.05,0.5]
BBI1	BRD1	BBI	BRD	BBI1BRD1	Glucose	0.0450895	0.0180246	-0.0248454	-0.00341041	-0.0248454	0.0180246	0.181373	(0.05,0.5]
BBI1	BRD1	BBI	BRD	BBI1BRD1	Glycerol	-10	-10	0.10436	-4.94782	-10	0.10436	0.181373	(0.05,0.5]
BBI1	BMK1	BBI	BMK	BBI1BMK1	Glu+Sorbitol	-0.010427	0.0796151	0.10245	0.0910326	0.0796151	0.10245	0.191242	(0.05,0.5]
BBI1	BMK1	BBI	BMK	BBI1BMK1	Glucose	0.0230881	0.0180246	0.0206207	0.0193227	0.0180246	0.0206207	0.191242	(0.05,0.5]
BBI1	BMK1	BBI	BMK	BBI1BMK1	Glycerol	-10	-10	0.0727937	-4.9636	-10	0.0727937	0.191242	(0.05,0.5]
BBI1	BQP1	BBI	BQP	BBI1BQP1	Glu+Sorbitol	0.00817195	0.0796151	0.108223	0.0939192	0.0796151	0.108223	0.227814	(0.05,0.5]
BBI1	BQP1	BBI	BQP	BBI1BQP1	Glucose	0.0221489	0.0180246	0.0119541	0.0149893	0.0119541	0.0180246	0.227814	(0.05,0.5]
BBI1	BQP1	BBI	BQP	BBI1BQP1	Glycerol	-10	-10	-0.0301991	-5.0151	-10	-0.0301991	0.227814	(0.05,0.5]
BBI1	BLV1	BBI	BLV	BBI1BLV1	Glu+Sorbitol	0.0557188	0.0796151	0.148788	0.114201	0.0796151	0.148788	0.194331	(0.05,0.5]
BBI1	BLV1	BBI	BLV	BBI1BLV1	Glucose	0.0140107	0.0180246	-0.0681483	-0.0250618	-0.0681483	0.0180246	0.194331	(0.05,0.5]
BBI1	BLV1	BBI	BLV	BBI1BLV1	Glycerol	-0.0548033	-10	0.0838921	-4.95805	-10	0.0838921	0.194331	(0.05,0.5]
BBI1	BQQ1	BBI	BQQ	BBI1BQQ1	Glu+Sorbitol	-0.034718	0.0796151	0.0432009	0.061408	0.0432009	0.0796151	0.192081	(0.05,0.5]
BBI1	BQQ1	BBI	BQQ	BBI1BQQ1	Glucose	-0.0196608	0.0180246	0.0291802	0.0236024	0.0180246	0.0291802	0.192081	(0.05,0.5]
BBI1	BQQ1	BBI	BQQ	BBI1BQQ1	Glycerol	-10	-10	0.0824425	-4.95878	-10	0.0824425	0.192081	(0.05,0.5]
BBI1	BMA1	BBI	BMA	BBI1BMA1	Glu+Sorbitol	-0.037232	0.0796151	0.0267219	0.0531685	0.0267219	0.0796151	1.55964	(1, 1.5]
BBI1	BMA1	BBI	BMA	BBI1BMA1	Glucose	-0.0418309	0.0180246	0.0277247	0.0228747	0.0180246	0.0277247	1.55964	(1, 1.5]
BBI1	BMA1	BBI	BMA	BBI1BMA1	Glycerol	-10	-10	0.0885346	-4.95573	-10	0.0885346	1.55964	(1, 1.5]
BBI1	BQR1	BBI	BQR	BBI1BQR1	Glu+Sorbitol	0.0455907	0.0796151	0.0524282	0.0660216	0.0524282	0.0796151	0.176385	(0.05,0.5]
BBI1	BQR1	BBI	BQR	BBI1BQR1	Glucose	0.0200193	0.0180246	-0.0545715	-0.0182735	-0.0545715	0.0180246	0.176385	(0.05,0.5]
BBI1	BQR1	BBI	BQR	BBI1BQR1	Glycerol	-0.0843258	-10	0.0588489	-4.97058	-10	0.0588489	0.176385	(0.05,0.5]
BBI1	CAD1	BBI	CAD	BBI1CAD1	Glu+Sorbitol	-10	0.0796151	0.0934632	0.0865391	0.0796151	0.0934632	0.33148	(0.05,0.5]
BBI1	CAD1	BBI	CAD	BBI1CAD1	Glucose	-10	0.0180246	-0.0194773	-0.00072635	-0.0194773	0.0180246	0.33148	(0.05,0.5]
BBI1	CAD1	BBI	CAD	BBI1CAD1	Glycerol	-10	-10	-10	-10	-10	-10	0.33148	(0.05,0.5]
BBI1	BSB1	BBI	BSB	BBI1BSB1	Glu+Sorbitol	-10	0.0796151	-10	-4.96019	-10	0.0796151	0.182309	(0.05,0.5]
BBI1	BSB1	BBI	BSB	BBI1BSB1	Glucose	-10	0.0180246	-10	0.0180246	0.0180246	0.0180246	0.182309	(0.05,0.5]
BBI1	BSB1	BBI	BSB	BBI1BSB1	Glycerol	-10	-10	-10	-10	-10	-10	0.182309	(0.05,0.5]
BBI1	BTH1	BBI	BTH	BBI1BTH1	Glu+Sorbitol	-0.020751	0.0796151	0.0555657	0.0675904	0.0555657	0.0796151	0.181253	(0.05,0.5]
BBI1	BTH1	BBI	BTH	BBI1BTH1	Glucose	0.0143299	0.0180246	-0.01391	0.00205729	-0.01391	0.0180246	0.181253	(0.05,0.5]
BBI1	BTH1	BBI	BTH	BBI1BTH1	Glycerol	-10	-10	-1	-5.5	-10	-1	0.181253	(0.05,0.5]
BBI1	AHP1	BBI	AHP	BBI1AHP1	Glu+Sorbitol	0.0494566	0.0796151	-1	-0.460192	-1	0.0796151	0.340907	(0.05,0.5]
BBI1	AHP1	BBI	AHP	BBI1AHP1	Glucose	-10	0.0180246	-1	-0.490988	-1	0.0180246	0.340907	(0.05,0.5]
BBI1	AHP1	BBI	AHP	BBI1AHP1	Glycerol	-10	-10	0.0888156	-4.95559	-10	0.0888156	0.340907	(0.05,0.5]
BBI1	CQD1	BBI	CQD	BBI1CQD1	Glu+Sorbitol	-10	0.0796151	0.0454048	0.06251	0.0454048	0.0796151	0.766101	(0.5,1]
BBI1	CQD1	BBI	CQD	BBI1CQD1	Glucose	0.0318664	0.0180246	0.0106465	0.0143356	0.0106465	0.0180246	0.766101	(0.5,1]
BBI1	CQD1	BBI	CQD	BBI1CQD1	Glycerol	-10	-10	-10	-10	-10	-10	0.766101	(0.5,1]
BBI1	APV1	BBI	APV	BBI1APV1	Glu+Sorbitol	0.0549198	0.0796151	0.0394829	0.059549	0.0394829	0.0796151	0.172452	(0.05,0.5]
BBI1	APV1	BBI	APV	BBI1APV1	Glucose	0.0512164	0.0180246	-0.0613302	-0.0216528	-0.0613302	0.0180246	0.172452	(0.05,0.5]
BBI1	APV1	BBI	APV	BBI1APV1	Glycerol	-0.0838435	-10	0.176787	-4.91161	-10	0.176787	0.172452	(0.05,0.5]
BBI1	AST1	BBI	AST	BBI1AST1	Glu+Sorbitol	-0.0369237	0.0796151	-1	-0.460192	-1	0.0796151	0.315938	(0.05,0.5]
BBI1	AST1	BBI	AST	BBI1AST1	Glucose	0.0321485	0.0180246	0.0143308	0.0161777	0.0143308	0.0180246	0.315938	(0.05,0.5]
BBI1	AST1	BBI	AST	BBI1AST1	Glycerol	-10	-10	-1	-5.5	-10	-1	0.315938	(0.05,0.5]
BBI1	CCV1	BBI	CCV	BBI1CCV1	Glu+Sorbitol	0.0414782	0.0796151	0.107101	0.0933579	0.0796151	0.107101	1.45378	(1, 1.5]
BBI1	CCV1	BBI	CCV	BBI1CCV1	Glucose	0.0309139	0.0180246	0.044604	0.0313143	0.0180246	0.044604	1.45378	(1, 1.5]
BBI1	CCV1	BBI	CCV	BBI1CCV1	Glycerol	-0.0881779	-10	-1	-5.5	-10	-1	1.45378	(1, 1.5]
BBI1	YAR1	BBI	YAR	BBI1YAR1	Glu+Sorbitol	-0.0671283	0.0796151	-1	-0.460192	-1	0.0796151	0.807864	(0.5,1]
BBI1	YAR1	BBI	YAR	BBI1YAR1	Glucose	0.0280144	0.0180246	-0.0705407	-0.0262581	-0.0705407	0.0180246	0.807864	(0.5,1]
BBI1	YAR1	BBI	YAR	BBI1YAR1	Glycerol	-10	-10	-1	-5.5	-10	-1	0.807864	(0.5,1]
BBI1	YBU1	BBI	YBU	BBI1YBU1	Glu+Sorbitol	-0.0430999	0.0796151	-1	-0.460192	-1	0.0796151	1.07762	(0.5,1]
BBI1	YBU1	BBI	YBU	BBI1YBU1	Glucose	-10	0.0180246	-10	-4.99099	-10	0.0180246	1.07762	(0.5,1]
BBI1	YBU1	BBI	YBU	BBI1YBU1	Glycerol	-10	-10	-1	-5.5	-10	-1	1.07762	(0.5,1]
BCB1	AKB1	BCB	AKB	BCB1AKB1	Glu+Sorbitol	-10	-10	0.139707	-4.93015	-10	0.139707	1.83189	(1, 1.5]
BCB1	AKB1	BCB	AKB	BCB1AKB1	Glucose	-10	-1	-0.0154866	-0.507743	-1	-0.0154866	1.83189	(1, 1.5]
BCB1	AKB1	BCB	AKB	BCB1AKB1	Glycerol	-10	-10	-1	-5.5	-10	-1	1.83189	(1, 1.5]
BCB1	AKP1	BCB	AKP	BCB1AKP1	Glu+Sorbitol	-10	-10	0.0982963	-4.95085	-10	0.0982963	1.37026	(1, 1.5]
BCB1	AKP1	BCB	AKP	BCB1AKP1	Glucose	-10	-1	-0.0557565	-0.527878	-1	-0.0557565	1.37026	(1, 1.5]
BCB1	AKP1	BCB	AKP	BCB1AKP1	Glycerol	-10	-10	-0.109008	-5.0545	-10	-0.109008	1.37026	(1, 1.5]
BCB1	ALG1	BCB	ALG	BCB1ALG1	Glu+Sorbitol	-10	-10	0.0868454	-4.95658	-10	0.0868454	1.48272	(1, 1.5]
BCB1	ALG1	BCB	ALG	BCB1ALG1	Glucose	-10	-1	-0.141619	-0.570809	-1	-0.141619	1.48272	(1, 1.5]
BCB1	ALG1	BCB	ALG	BCB1ALG1	Glycerol	-10	-10	-0.0464457	-5.02322	-10	-0.0464457	1.48272	(1, 1.5]
BCB1	ANG1	BCB	ANG	BCB1ANG1	Glu+Sorbitol	-10	-10	0.0628167	-4.96859	-10	0.0628167	1.65541	(1, 1.5]
BCB1	ANG1	BCB	ANG	BCB1ANG1	Glucose	-10	-1	0.0663533	-0.466823	-1	0.0663533	1.65541	(1, 1.5]
BCB1	ANG1	BCB	ANG	BCB1ANG1	Glycerol	-10	-10	-1	-5.5	-10	-1	1.65541	(1, 1.5]
BCB1	AIM1	BCB	AIM	BCB1AIM1	Glu+Sorbitol	-10	-10	-1	-5.5	-10	-1	1.39518	(1, 1.5]
BCB1	AIM1	BCB	AIM	BCB1AIM1	Glucose	-10	-1	-10	-5.5	-10	-1	1.39518	(1, 1.5]
BCB1	AIM1	BCB	AIM	BCB1AIM1	Glycerol	-10	-10	-10	-10	-10	-10	1.39518	(1, 1.5]
BCB1	AKV1	BCB	AKV	BCB1AKV1	Glu+Sorbitol	-10	-10	0.0943177	-4.95284	-10	0.0943177	1.37028	(1, 1.5]
BCB1	AKV1	BCB	AKV	BCB1AKV1	Glucose	-10	-1	-0.033945	-0.516972	-1	-0.033945	1.37028	(1, 1.5]
BCB1	AKV1	BCB	AKV	BCB1AKV1	Glycerol	-10	-10	-0.0735332	-5.03677	-10	-0.0735332	1.37028	(1, 1.5]
BCB1	BBI1	BCB	BBI	BCB1BBI1	Glu+Sorbitol	-10	-10	0.242166	-4.87892	-10	0.242166	1.36822	(1, 1.5]
BCB1	BBI1	BCB	BBI	BCB1BBI1	Glucose	-10	-1	0.0118567	-0.494072	-1	0.0118567	1.36822	(1, 1.5]
BCB1	BBI1	BCB	BBI	BCB1BBI1	Glycerol	-10	-10	-0.0628554	-5.03143	-10	-0.0628554	1.36822	(1, 1.5]
BCB1	BAK1	BCB	BAK	BCB1BAK1	Glu+Sorbitol	-10	-10	0.0545167	-4.97274	-10	0.0545167	1.79176	(1, 1.5]
BCB1	BAK1	BCB	BAK	BCB1BAK1	Glucose	-10	-1	0.0639478	-0.468026	-1	0.0639478	1.79176	(1, 1.5]
BCB1	BAK1	BCB	BAK	BCB1BAK1	Glycerol	-10	-10	-0.00177197	-5.00089	-10	-0.00177197	1.79176	(1, 1.5]
BCB1	BEH1	BCB	BEH	BCB1BEH1	Glu+Sorbitol	-10	-10	0.114205	-4.9429	-10	0.114205	1.79337	(1, 1.5]
BCB1	BEH1	BCB	BEH	BCB1BEH1	Glucose	-10	-1	-0.0314472	-0.515724	-1	-0.0314472	1.79337	(1, 1.5]
BCB1	BEH1	BCB	BEH	BCB1BEH1	Glycerol	-10	-10	-1	-5.5	-10	-1	1.79337	(1, 1.5]
BCB1	BLA1	BCB	BLA	BCB1BLA1	Glu+Sorbitol	-10	-10	-10	-10	-10	-10	1.37037	(1, 1.5]
BCB1	BLA1	BCB	BLA	BCB1BLA1	Glucose	-10	-1	-10	-5.5	-10	-1	1.37037	(1, 1.5]
BCB1	BLA1	BCB	BLA	BCB1BLA1	Glycerol	-10	-10	-10	-10	-10	-10	1.37037	(1, 1.5]
BCB1	BHM1	BCB	BHM	BCB1BHM1	Glu+Sorbitol	-10	-10	-1	-5.5	-10	-1	1.38978	(1, 1.5]
BCB1	BHM1	BCB	BHM	BCB1BHM1	Glucose	-10	-1	-10	-5.5	-10	-1	1.38978	(1, 1.5]
BCB1	BHM1	BCB	BHM	BCB1BHM1	Glycerol	-10	-10	-1	-5.5	-10	-1	1.38978	(1, 1.5]
BCB1	BHN1	BCB	BHN	BCB1BHN1	Glu+Sorbitol	-10	-10	0.00750642	-4.99625	-10	0.00750642	1.37398	(1, 1.5]
BCB1	BHN1	BCB	BHN	BCB1BHN1	Glucose	-10	-1	-1	-1	-1	-1	1.37398	(1, 1.5]
BCB1	BHN1	BCB	BHN	BCB1BHN1	Glycerol	-10	-10	-1	-5.5	-10	-1	1.37398	(1, 1.5]
BCB1	BHB1	BCB	BHB	BCB1BHB1	Glu+Sorbitol	-1	-10	-1	-5.5	-10	-1	1.38908	(1, 1.5]
BCB1	BHB1	BCB	BHB	BCB1BHB1	Glucose	-10	-1	-10	-5.5	-10	-1	1.38908	(1, 1.5]
BCB1	BHB1	BCB	BHB	BCB1BHB1	Glycerol	-10	-10	-10	-10	-10	-10	1.38908	(1, 1.5]
BCB1	BLE1	BCB	BLE	BCB1BLE1	Glu+Sorbitol	-10	-10	-1	-5.5	-10	-1	1.37599	(1, 1.5]
BCB1	BLE1	BCB	BLE	BCB1BLE1	Glucose	-10	-1	-0.0748489	-0.537424	-1	-0.0748489	1.37599	(1, 1.5]
BCB1	BLE1	BCB	BLE	BCB1BLE1	Glycerol	-10	-10	-0.044381	-5.02219	-10	-0.044381	1.37599	(1, 1.5]
BCB1	BHF1	BCB	BHF	BCB1BHF1	Glu+Sorbitol	-10	-10	0.0591106	-4.97044	-10	0.0591106	1.36459	(1, 1.5]
BCB1	BHF1	BCB	BHF	BCB1BHF1	Glucose	-10	-1	0.0612509	-0.469375	-1	0.0612509	1.36459	(1, 1.5]
BCB1	BHF1	BCB	BHF	BCB1BHF1	Glycerol	-10	-10	0.0945635	-4.95272	-10	0.0945635	1.36459	(1, 1.5]
BCB1	BKR1	BCB	BKR	BCB1BKR1	Glu+Sorbitol	-10	-10	-1	-5.5	-10	-1	1.37163	(1, 1.5]
BCB1	BKR1	BCB	BKR	BCB1BKR1	Glucose	-10	-1	-0.013402	-0.506701	-1	-0.013402	1.37163	(1, 1.5]
BCB1	BKR1	BCB	BKR	BCB1BKR1	Glycerol	-10	-10	-1	-5.5	-10	-1	1.37163	(1, 1.5]
BCB1	BLL1	BCB	BLL	BCB1BLL1	Glu+Sorbitol	-10	-10	-1	-5.5	-10	-1	1.37869	(1, 1.5]
BCB1	BLL1	BCB	BLL	BCB1BLL1	Glucose	-10	-1	-1	-1	-1	-1	1.37869	(1, 1.5]
BCB1	BLL1	BCB	BLL	BCB1BLL1	Glycerol	0.0424935	-10	0.120353	-4.93982	-10	0.120353	1.37869	(1, 1.5]
BCB1	BNI1	BCB	BNI	BCB1BNI1	Glu+Sorbitol	-10	-10	-10	-10	-10	-10	1.37339	(1, 1.5]
BCB1	BNI1	BCB	BNI	BCB1BNI1	Glucose	-10	-1	-10	-1	-1	-1	1.37339	(1, 1.5]
BCB1	BNI1	BCB	BNI	BCB1BNI1	Glycerol	-10	-10	-10	-10	-10	-10	1.37339	(1, 1.5]
BCB1	BQG1	BCB	BQG	BCB1BQG1	Glu+Sorbitol	-10	-10	0.133013	-4.93349	-10	0.133013	1.37515	(1, 1.5]
BCB1	BQG1	BCB	BQG	BCB1BQG1	Glucose	-10	-1	-0.0571925	-0.528596	-1	-0.0571925	1.37515	(1, 1.5]
BCB1	BQG1	BCB	BQG	BCB1BQG1	Glycerol	-10	-10	0.0537228	-4.97314	-10	0.0537228	1.37515	(1, 1.5]
BCB1	BNK1	BCB	BNK	BCB1BNK1	Glu+Sorbitol	-10	-10	-1	-5.5	-10	-1	1.37341	(1, 1.5]
BCB1	BNK1	BCB	BNK	BCB1BNK1	Glucose	-10	-1	-0.0796816	-0.539841	-1	-0.0796816	1.37341	(1, 1.5]
BCB1	BNK1	BCB	BNK	BCB1BNK1	Glycerol	-10	-10	0.115878	-4.94206	-10	0.115878	1.37341	(1, 1.5]
BCB1	BPQ1	BCB	BPQ	BCB1BPQ1	Glu+Sorbitol	-1	-10	0.196057	-4.90197	-10	0.196057	1.3604	(1, 1.5]
BCB1	BPQ1	BCB	BPQ	BCB1BPQ1	Glucose	-10	-1	0.00714221	-0.496429	-1	0.00714221	1.3604	(1, 1.5]
BCB1	BPQ1	BCB	BPQ	BCB1BPQ1	Glycerol	-10	-10	0.0632255	-4.96839	-10	0.0632255	1.3604	(1, 1.5]
BCB1	BQH1	BCB	BQH	BCB1BQH1	Glu+Sorbitol	-10	-10	0.00347705	-4.99826	-10	0.00347705	1.37678	(1, 1.5]
BCB1	BQH1	BCB	BQH	BCB1BQH1	Glucose	-10	-1	0.0201877	-0.489906	-1	0.0201877	1.37678	(1, 1.5]
BCB1	BQH1	BCB	BQH	BCB1BQH1	Glycerol	-10	-10	-1	-5.5	-10	-1	1.37678	(1, 1.5]
BCB1	BRA1	BCB	BRA	BCB1BRA1	Glu+Sorbitol	-10	-10	0.0670496	-4.96648	-10	0.0670496	1.37556	(1, 1.5]
BCB1	BRA1	BCB	BRA	BCB1BRA1	Glucose	-10	-1	-0.0988197	-0.54941	-1	-0.0988197	1.37556	(1, 1.5]
BCB1	BRA1	BCB	BRA	BCB1BRA1	Glycerol	-10	-10	-1	-5.5	-10	-1	1.37556	(1, 1.5]
BCB1	BLN1	BCB	BLN	BCB1BLN1	Glu+Sorbitol	-10	-10	-10	-10	-10	-10	1.37734	(1, 1.5]
BCB1	BLN1	BCB	BLN	BCB1BLN1	Glucose	-10	-1	-10	-1	-1	-1	1.37734	(1, 1.5]
BCB1	BLN1	BCB	BLN	BCB1BLN1	Glycerol	-10	-10	-10	-10	-10	-10	1.37734	(1, 1.5]
BCB1	BQI1	BCB	BQI	BCB1BQI1	Glu+Sorbitol	-10	-10	0.143956	-4.92802	-10	0.143956	1.37307	(1, 1.5]
BCB1	BQI1	BCB	BQI	BCB1BQI1	Glucose	-10	-1	-0.108288	-0.554144	-1	-0.108288	1.37307	(1, 1.5]
BCB1	BQI1	BCB	BQI	BCB1BQI1	Glycerol	-10	-10	-0.01173	-5.00587	-10	-0.01173	1.37307	(1, 1.5]
BCB1	BRB1	BCB	BRB	BCB1BRB1	Glu+Sorbitol	-10	-10	0.109832	-4.94508	-10	0.109832	1.3908	(1, 1.5]
BCB1	BRB1	BCB	BRB	BCB1BRB1	Glucose	-10	-1	0.0350566	-0.482472	-1	0.0350566	1.3908	(1, 1.5]
BCB1	BRB1	BCB	BRB	BCB1BRB1	Glycerol	-10	-10	0.000627839	-4.99969	-10	0.000627839	1.3908	(1, 1.5]
BCB1	BLP1	BCB	BLP	BCB1BLP1	Glu+Sorbitol	-10	-10	0.159343	-4.92033	-10	0.159343	1.37787	(1, 1.5]
BCB1	BLP1	BCB	BLP	BCB1BLP1	Glucose	-10	-1	0.0477277	-0.476136	-1	0.0477277	1.37787	(1, 1.5]
BCB1	BLP1	BCB	BLP	BCB1BLP1	Glycerol	-10	-10	0.0191829	-4.99041	-10	0.0191829	1.37787	(1, 1.5]
BCB1	BRC1	BCB	BRC	BCB1BRC1	Glu+Sorbitol	-10	-10	0.107766	-4.94612	-10	0.107766	1.36257	(1, 1.5]
BCB1	BRC1	BCB	BRC	BCB1BRC1	Glucose	-10	-1	-0.0843597	-0.54218	-1	-0.0843597	1.36257	(1, 1.5]
BCB1	BRC1	BCB	BRC	BCB1BRC1	Glycerol	-10	-10	-0.0845599	-5.04228	-10	-0.0845599	1.36257	(1, 1.5]
BCB1	BPT1	BCB	BPT	BCB1BPT1	Glu+Sorbitol	-10	-10	0.0437225	-4.97814	-10	0.0437225	1.37331	(1, 1.5]
BCB1	BPT1	BCB	BPT	BCB1BPT1	Glucose	-10	-1	-0.0226414	-0.511321	-1	-0.0226414	1.37331	(1, 1.5]
BCB1	BPT1	BCB	BPT	BCB1BPT1	Glycerol	-10	-10	0.0527905	-4.9736	-10	0.0527905	1.37331	(1, 1.5]
BCB1	BRD1	BCB	BRD	BCB1BRD1	Glu+Sorbitol	-10	-10	0.0462453	-4.97688	-10	0.0462453	1.372	(1, 1.5]
BCB1	BRD1	BCB	BRD	BCB1BRD1	Glucose	-10	-1	-0.0248454	-0.512423	-1	-0.0248454	1.372	(1, 1.5]
BCB1	BRD1	BCB	BRD	BCB1BRD1	Glycerol	-10	-10	0.10436	-4.94782	-10	0.10436	1.372	(1, 1.5]
BCB1	BMK1	BCB	BMK	BCB1BMK1	Glu+Sorbitol	-10	-10	0.10245	-4.94877	-10	0.10245	1.37362	(1, 1.5]
BCB1	BMK1	BCB	BMK	BCB1BMK1	Glucose	-10	-1	0.0206207	-0.48969	-1	0.0206207	1.37362	(1, 1.5]
BCB1	BMK1	BCB	BMK	BCB1BMK1	Glycerol	-10	-10	0.0727937	-4.9636	-10	0.0727937	1.37362	(1, 1.5]
BCB1	BQP1	BCB	BQP	BCB1BQP1	Glu+Sorbitol	-10	-10	0.108223	-4.94589	-10	0.108223	1.37741	(1, 1.5]
BCB1	BQP1	BCB	BQP	BCB1BQP1	Glucose	-10	-1	0.0119541	-0.494023	-1	0.0119541	1.37741	(1, 1.5]
BCB1	BQP1	BCB	BQP	BCB1BQP1	Glycerol	-10	-10	-0.0301991	-5.0151	-10	-0.0301991	1.37741	(1, 1.5]
BCB1	BLV1	BCB	BLV	BCB1BLV1	Glu+Sorbitol	-10	-10	0.148788	-4.92561	-10	0.148788	1.37498	(1, 1.5]
BCB1	BLV1	BCB	BLV	BCB1BLV1	Glucose	-10	-1	-0.0681483	-0.534074	-1	-0.0681483	1.37498	(1, 1.5]
BCB1	BLV1	BCB	BLV	BCB1BLV1	Glycerol	-0.0194816	-10	0.0838921	-4.95805	-10	0.0838921	1.37498	(1, 1.5]
BCB1	BQQ1	BCB	BQQ	BCB1BQQ1	Glu+Sorbitol	-10	-10	0.0432009	-4.9784	-10	0.0432009	1.37252	(1, 1.5]
BCB1	BQQ1	BCB	BQQ	BCB1BQQ1	Glucose	-10	-1	0.0291802	-0.48541	-1	0.0291802	1.37252	(1, 1.5]
BCB1	BQQ1	BCB	BQQ	BCB1BQQ1	Glycerol	-10	-10	0.0824425	-4.95878	-10	0.0824425	1.37252	(1, 1.5]
BCB1	BMA1	BCB	BMA	BCB1BMA1	Glu+Sorbitol	-10	-10	0.0267219	-4.98664	-10	0.0267219	1.88829	(1, 1.5]
BCB1	BMA1	BCB	BMA	BCB1BMA1	Glucose	-10	-1	0.0277247	-0.486138	-1	0.0277247	1.88829	(1, 1.5]
BCB1	BMA1	BCB	BMA	BCB1BMA1	Glycerol	-10	-10	0.0885346	-4.95573	-10	0.0885346	1.88829	(1, 1.5]
BCB1	BQR1	BCB	BQR	BCB1BQR1	Glu+Sorbitol	-10	-10	0.0524282	-4.97379	-10	0.0524282	1.37295	(1, 1.5]
BCB1	BQR1	BCB	BQR	BCB1BQR1	Glucose	-10	-1	-0.0545715	-0.527286	-1	-0.0545715	1.37295	(1, 1.5]
BCB1	BQR1	BCB	BQR	BCB1BQR1	Glycerol	-10	-10	0.0588489	-4.97058	-10	0.0588489	1.37295	(1, 1.5]
BCB1	CAD1	BCB	CAD	BCB1CAD1	Glu+Sorbitol	-10	-10	0.0934632	-4.95327	-10	0.0934632	1.40226	(1, 1.5]
BCB1	CAD1	BCB	CAD	BCB1CAD1	Glucose	-10	-1	-0.0194773	-0.509739	-1	-0.0194773	1.40226	(1, 1.5]
BCB1	CAD1	BCB	CAD	BCB1CAD1	Glycerol	-10	-10	-10	-10	-10	-10	1.40226	(1, 1.5]
BCB1	BSB1	BCB	BSB	BCB1BSB1	Glu+Sorbitol	-10	-10	-10	-10	-10	-10	1.37337	(1, 1.5]
BCB1	BSB1	BCB	BSB	BCB1BSB1	Glucose	-10	-1	-10	-1	-1	-1	1.37337	(1, 1.5]
BCB1	BSB1	BCB	BSB	BCB1BSB1	Glycerol	-10	-10	-10	-10	-10	-10	1.37337	(1, 1.5]
BCB1	BTH1	BCB	BTH	BCB1BTH1	Glu+Sorbitol	-10	-10	0.0555657	-4.97222	-10	0.0555657	1.36739	(1, 1.5]
BCB1	BTH1	BCB	BTH	BCB1BTH1	Glucose	-10	-1	-0.01391	-0.506955	-1	-0.01391	1.36739	(1, 1.5]
BCB1	BTH1	BCB	BTH	BCB1BTH1	Glycerol	-10	-10	-1	-5.5	-10	-1	1.36739	(1, 1.5]
BCB1	AHP1	BCB	AHP	BCB1AHP1	Glu+Sorbitol	-10	-10	-1	-5.5	-10	-1	1.40855	(1, 1.5]
BCB1	AHP1	BCB	AHP	BCB1AHP1	Glucose	-10	-1	-1	-1	-1	-1	1.40855	(1, 1.5]
BCB1	AHP1	BCB	AHP	BCB1AHP1	Glycerol	-10	-10	0.0888156	-4.95559	-10	0.0888156	1.40855	(1, 1.5]
BCB1	CQD1	BCB	CQD	BCB1CQD1	Glu+Sorbitol	-10	-10	0.0454048	-4.9773	-10	0.0454048	1.54678	(1, 1.5]
BCB1	CQD1	BCB	CQD	BCB1CQD1	Glucose	-10	-1	0.0106465	-0.494677	-1	0.0106465	1.54678	(1, 1.5]
BCB1	CQD1	BCB	CQD	BCB1CQD1	Glycerol	-10	-10	-10	-10	-10	-10	1.54678	(1, 1.5]
BCB1	APV1	BCB	APV	BCB1APV1	Glu+Sorbitol	-10	-10	0.0394829	-4.98026	-10	0.0394829	1.37308	(1, 1.5]
BCB1	APV1	BCB	APV	BCB1APV1	Glucose	-10	-1	-0.0613302	-0.530665	-1	-0.0613302	1.37308	(1, 1.5]
BCB1	APV1	BCB	APV	BCB1APV1	Glycerol	-10	-10	0.176787	-4.91161	-10	0.176787	1.37308	(1, 1.5]
BCB1	AST1	BCB	AST	BCB1AST1	Glu+Sorbitol	-10	-10	-1	-5.5	-10	-1	1.39154	(1, 1.5]
BCB1	AST1	BCB	AST	BCB1AST1	Glucose	-10	-1	0.0143308	-0.492835	-1	0.0143308	1.39154	(1, 1.5]
BCB1	AST1	BCB	AST	BCB1AST1	Glycerol	-10	-10	-1	-5.5	-10	-1	1.39154	(1, 1.5]
BCB1	CCV1	BCB	CCV	BCB1CCV1	Glu+Sorbitol	-10	-10	0.107101	-4.94645	-10	0.107101	1.78511	(1, 1.5]
BCB1	CCV1	BCB	CCV	BCB1CCV1	Glucose	-10	-1	0.044604	-0.477698	-1	0.044604	1.78511	(1, 1.5]
BCB1	CCV1	BCB	CCV	BCB1CCV1	Glycerol	-10	-10	-1	-5.5	-10	-1	1.78511	(1, 1.5]
BCB1	YAR1	BCB	YAR	BCB1YAR1	Glu+Sorbitol	-10	-10	-1	-5.5	-10	-1	1.53562	(1, 1.5]
BCB1	YAR1	BCB	YAR	BCB1YAR1	Glucose	-10	-1	-0.0705407	-0.53527	-1	-0.0705407	1.53562	(1, 1.5]
BCB1	YAR1	BCB	YAR	BCB1YAR1	Glycerol	-10	-10	-1	-5.5	-10	-1	1.53562	(1, 1.5]
BCB1	YBU1	BCB	YBU	BCB1YBU1	Glu+Sorbitol	-10	-10	-1	-5.5	-10	-1	1.65458	(1, 1.5]
BCB1	YBU1	BCB	YBU	BCB1YBU1	Glucose	-10	-1	-10	-5.5	-10	-1	1.65458	(1, 1.5]
BCB1	YBU1	BCB	YBU	BCB1YBU1	Glycerol	-10	-10	-1	-5.5	-10	-1	1.65458	(1, 1.5]
BAS1	AKB1	BAS	AKB	BAS1AKB1	Glu+Sorbitol	0.0275834	0.0893175	0.139707	0.114512	0.0893175	0.139707	1.53681	(1, 1.5]
BAS1	AKB1	BAS	AKB	BAS1AKB1	Glucose	-0.00439295	0.0653471	-0.0154866	0.0249302	-0.0154866	0.0653471	1.53681	(1, 1.5]
BAS1	AKB1	BAS	AKB	BAS1AKB1	Glycerol	-0.0430601	-1	-1	-1	-1	-1	1.53681	(1, 1.5]
BAS1	AKP1	BAS	AKP	BAS1AKP1	Glu+Sorbitol	0.108509	0.0893175	0.0982963	0.0938069	0.0893175	0.0982963	0.182798	(0.05,0.5]
BAS1	AKP1	BAS	AKP	BAS1AKP1	Glucose	0.00913539	0.0653471	-0.0557565	0.0047953	-0.0557565	0.0653471	0.182798	(0.05,0.5]
BAS1	AKP1	BAS	AKP	BAS1AKP1	Glycerol	-1	-1	-0.109008	-0.554504	-1	-0.109008	0.182798	(0.05,0.5]
BAS1	ALG1	BAS	ALG	BAS1ALG1	Glu+Sorbitol	-10	0.0893175	0.0868454	0.0880814	0.0868454	0.0893175	0.773301	(0.5,1]
BAS1	ALG1	BAS	ALG	BAS1ALG1	Glucose	-10	0.0653471	-0.141619	-0.0381357	-0.141619	0.0653471	0.773301	(0.5,1]
BAS1	ALG1	BAS	ALG	BAS1ALG1	Glycerol	-10	-1	-0.0464457	-0.523223	-1	-0.0464457	0.773301	(0.5,1]
BAS1	ANG1	BAS	ANG	BAS1ANG1	Glu+Sorbitol	-10	0.0893175	0.0628167	0.0760671	0.0628167	0.0893175	1.32628	(1, 1.5]
BAS1	ANG1	BAS	ANG	BAS1ANG1	Glucose	-10	0.0653471	0.0663533	0.0658502	0.0653471	0.0663533	1.32628	(1, 1.5]
BAS1	ANG1	BAS	ANG	BAS1ANG1	Glycerol	-10	-1	-1	-1	-1	-1	1.32628	(1, 1.5]
BAS1	AIM1	BAS	AIM	BAS1AIM1	Glu+Sorbitol	-10	0.0893175	-1	-0.455341	-1	0.0893175	0.260843	(0.05,0.5]
BAS1	AIM1	BAS	AIM	BAS1AIM1	Glucose	-10	0.0653471	-10	-4.96733	-10	0.0653471	0.260843	(0.05,0.5]
BAS1	AIM1	BAS	AIM	BAS1AIM1	Glycerol	-10	-1	-10	-5.5	-10	-1	0.260843	(0.05,0.5]
BAS1	AKV1	BAS	AKV	BAS1AKV1	Glu+Sorbitol	0.0709864	0.0893175	0.0943177	0.0918176	0.0893175	0.0943177	0.182743	(0.05,0.5]
BAS1	AKV1	BAS	AKV	BAS1AKV1	Glucose	0.00826578	0.0653471	-0.033945	0.015701	-0.033945	0.0653471	0.182743	(0.05,0.5]
BAS1	AKV1	BAS	AKV	BAS1AKV1	Glycerol	-1	-1	-0.0735332	-0.536767	-1	-0.0735332	0.182743	(0.05,0.5]
BAS1	BBI1	BAS	BBI	BAS1BBI1	Glu+Sorbitol	-10	0.0893175	0.242166	0.165742	0.0893175	0.242166	0.182785	(0.05,0.5]
BAS1	BBI1	BAS	BBI	BAS1BBI1	Glucose	-10	0.0653471	0.0118567	0.0386019	0.0118567	0.0653471	0.182785	(0.05,0.5]
BAS1	BBI1	BAS	BBI	BAS1BBI1	Glycerol	-10	-1	-0.0628554	-0.531428	-1	-0.0628554	0.182785	(0.05,0.5]
BAS1	BAK1	BAS	BAK	BAS1BAK1	Glu+Sorbitol	0.143502	0.0893175	0.0545167	0.0719171	0.0545167	0.0893175	1.46789	(1, 1.5]
BAS1	BAK1	BAS	BAK	BAS1BAK1	Glucose	0.0630649	0.0653471	0.0639478	0.0646475	0.0639478	0.0653471	1.46789	(1, 1.5]
BAS1	BAK1	BAS	BAK	BAS1BAK1	Glycerol	0.0730301	-1	-0.00177197	-0.500886	-1	-0.00177197	1.46789	(1, 1.5]
BAS1	BEH1	BAS	BEH	BAS1BEH1	Glu+Sorbitol	-10	0.0893175	0.114205	0.101761	0.0893175	0.114205	1.46296	(1, 1.5]
BAS1	BEH1	BAS	BEH	BAS1BEH1	Glucose	-10	0.0653471	-0.0314472	0.0169499	-0.0314472	0.0653471	1.46296	(1, 1.5]
BAS1	BEH1	BAS	BEH	BAS1BEH1	Glycerol	-10	-1	-1	-1	-1	-1	1.46296	(1, 1.5]
BAS1	BLA1	BAS	BLA	BAS1BLA1	Glu+Sorbitol	-0.00160642	0.0893175	-10	-4.95534	-10	0.0893175	0.167788	(0.05,0.5]
BAS1	BLA1	BAS	BLA	BAS1BLA1	Glucose	-10	0.0653471	-10	-4.96733	-10	0.0653471	0.167788	(0.05,0.5]
BAS1	BLA1	BAS	BLA	BAS1BLA1	Glycerol	-1	-1	-10	-5.5	-10	-1	0.167788	(0.05,0.5]
BAS1	BHM1	BAS	BHM	BAS1BHM1	Glu+Sorbitol	-10	0.0893175	-1	-0.455341	-1	0.0893175	0.26303	(0.05,0.5]
BAS1	BHM1	BAS	BHM	BAS1BHM1	Glucose	-10	0.0653471	-10	-4.96733	-10	0.0653471	0.26303	(0.05,0.5]
BAS1	BHM1	BAS	BHM	BAS1BHM1	Glycerol	-10	-1	-1	-1	-1	-1	0.26303	(0.05,0.5]
BAS1	BHN1	BAS	BHN	BAS1BHN1	Glu+Sorbitol	-0.0744574	0.0893175	0.00750642	0.0484119	0.00750642	0.0893175	0.182248	(0.05,0.5]
BAS1	BHN1	BAS	BHN	BAS1BHN1	Glucose	-0.0614632	0.0653471	-1	-0.467326	-1	0.0653471	0.182248	(0.05,0.5]
BAS1	BHN1	BAS	BHN	BAS1BHN1	Glycerol	-0.111469	-1	-1	-1	-1	-1	0.182248	(0.05,0.5]
BAS1	BHB1	BAS	BHB	BAS1BHB1	Glu+Sorbitol	-0.0564021	0.0893175	-1	-0.455341	-1	0.0893175	0.271745	(0.05,0.5]
BAS1	BHB1	BAS	BHB	BAS1BHB1	Glucose	-0.0646711	0.0653471	-10	-4.96733	-10	0.0653471	0.271745	(0.05,0.5]
BAS1	BHB1	BAS	BHB	BAS1BHB1	Glycerol	-10	-1	-10	-5.5	-10	-1	0.271745	(0.05,0.5]
BAS1	BLE1	BAS	BLE	BAS1BLE1	Glu+Sorbitol	-0.0800836	0.0893175	-1	-0.455341	-1	0.0893175	0.171507	(0.05,0.5]
BAS1	BLE1	BAS	BLE	BAS1BLE1	Glucose	-10	0.0653471	-0.0748489	-0.00475092	-0.0748489	0.0653471	0.171507	(0.05,0.5]
BAS1	BLE1	BAS	BLE	BAS1BLE1	Glycerol	-1	-1	-0.044381	-0.52219	-1	-0.044381	0.171507	(0.05,0.5]
BAS1	BHF1	BAS	BHF	BAS1BHF1	Glu+Sorbitol	0.0344833	0.0893175	0.0591106	0.074214	0.0591106	0.0893175	0.170373	(0.05,0.5]
BAS1	BHF1	BAS	BHF	BAS1BHF1	Glucose	-0.0181211	0.0653471	0.0612509	0.063299	0.0612509	0.0653471	0.170373	(0.05,0.5]
BAS1	BHF1	BAS	BHF	BAS1BHF1	Glycerol	-1	-1	0.0945635	-0.452718	-1	0.0945635	0.170373	(0.05,0.5]
BAS1	BKR1	BAS	BKR	BAS1BKR1	Glu+Sorbitol	0.00237757	0.0893175	-1	-0.455341	-1	0.0893175	0.184974	(0.05,0.5]
BAS1	BKR1	BAS	BKR	BAS1BKR1	Glucose	-10	0.0653471	-0.013402	0.0259725	-0.013402	0.0653471	0.184974	(0.05,0.5]
BAS1	BKR1	BAS	BKR	BAS1BKR1	Glycerol	-1	-1	-1	-1	-1	-1	0.184974	(0.05,0.5]
BAS1	BLL1	BAS	BLL	BAS1BLL1	Glu+Sorbitol	0.0293506	0.0893175	-1	-0.455341	-1	0.0893175	0.18433	(0.05,0.5]
BAS1	BLL1	BAS	BLL	BAS1BLL1	Glucose	-10	0.0653471	-1	-0.467326	-1	0.0653471	0.18433	(0.05,0.5]
BAS1	BLL1	BAS	BLL	BAS1BLL1	Glycerol	-0.0973573	-1	0.120353	-0.439823	-1	0.120353	0.18433	(0.05,0.5]
BAS1	BNI1	BAS	BNI	BAS1BNI1	Glu+Sorbitol	-10	0.0893175	-10	0.0893175	0.0893175	0.0893175	0.183446	(0.05,0.5]
BAS1	BNI1	BAS	BNI	BAS1BNI1	Glucose	-10	0.0653471	-10	0.0653471	0.0653471	0.0653471	0.183446	(0.05,0.5]
BAS1	BNI1	BAS	BNI	BAS1BNI1	Glycerol	-10	-1	-10	-1	-1	-1	0.183446	(0.05,0.5]
BAS1	BQG1	BAS	BQG	BAS1BQG1	Glu+Sorbitol	0.0849581	0.0893175	0.133013	0.111165	0.0893175	0.133013	0.180783	(0.05,0.5]
BAS1	BQG1	BAS	BQG	BAS1BQG1	Glucose	-0.0407301	0.0653471	-0.0571925	0.00407729	-0.0571925	0.0653471	0.180783	(0.05,0.5]
BAS1	BQG1	BAS	BQG	BAS1BQG1	Glycerol	-0.0766659	-1	0.0537228	-0.473139	-1	0.0537228	0.180783	(0.05,0.5]
BAS1	BNK1	BAS	BNK	BAS1BNK1	Glu+Sorbitol	0.0742178	0.0893175	-1	-0.455341	-1	0.0893175	0.174932	(0.05,0.5]
BAS1	BNK1	BAS	BNK	BAS1BNK1	Glucose	-0.0609096	0.0653471	-0.0796816	-0.00716726	-0.0796816	0.0653471	0.174932	(0.05,0.5]
BAS1	BNK1	BAS	BNK	BAS1BNK1	Glycerol	-1	-1	0.115878	-0.442061	-1	0.115878	0.174932	(0.05,0.5]
BAS1	BPQ1	BAS	BPQ	BAS1BPQ1	Glu+Sorbitol	0.0429256	0.0893175	0.196057	0.142687	0.0893175	0.196057	0.200362	(0.05,0.5]
BAS1	BPQ1	BAS	BPQ	BAS1BPQ1	Glucose	0.0142079	0.0653471	0.00714221	0.0362446	0.00714221	0.0653471	0.200362	(0.05,0.5]
BAS1	BPQ1	BAS	BPQ	BAS1BPQ1	Glycerol	-1	-1	0.0632255	-0.468387	-1	0.0632255	0.200362	(0.05,0.5]
BAS1	BQH1	BAS	BQH	BAS1BQH1	Glu+Sorbitol	-0.0373403	0.0893175	0.00347705	0.0463973	0.00347705	0.0893175	0.179097	(0.05,0.5]
BAS1	BQH1	BAS	BQH	BAS1BQH1	Glucose	-0.160939	0.0653471	0.0201877	0.0427674	0.0201877	0.0653471	0.179097	(0.05,0.5]
BAS1	BQH1	BAS	BQH	BAS1BQH1	Glycerol	-10	-1	-1	-1	-1	-1	0.179097	(0.05,0.5]
BAS1	BRA1	BAS	BRA	BAS1BRA1	Glu+Sorbitol	-0.145227	0.0893175	0.0670496	0.0781836	0.0670496	0.0893175	0.191913	(0.05,0.5]
BAS1	BRA1	BAS	BRA	BAS1BRA1	Glucose	-0.0672457	0.0653471	-0.0988197	-0.0167363	-0.0988197	0.0653471	0.191913	(0.05,0.5]
BAS1	BRA1	BAS	BRA	BAS1BRA1	Glycerol	-10	-1	-1	-1	-1	-1	0.191913	(0.05,0.5]
BAS1	BLN1	BAS	BLN	BAS1BLN1	Glu+Sorbitol	-10	0.0893175	-10	0.0893175	0.0893175	0.0893175	0.179107	(0.05,0.5]
BAS1	BLN1	BAS	BLN	BAS1BLN1	Glucose	-10	0.0653471	-10	0.0653471	0.0653471	0.0653471	0.179107	(0.05,0.5]
BAS1	BLN1	BAS	BLN	BAS1BLN1	Glycerol	-10	-1	-10	-1	-1	-1	0.179107	(0.05,0.5]
BAS1	BQI1	BAS	BQI	BAS1BQI1	Glu+Sorbitol	0.0731586	0.0893175	0.143956	0.116637	0.0893175	0.143956	0.159376	(0.05,0.5]
BAS1	BQI1	BAS	BQI	BAS1BQI1	Glucose	-0.040846	0.0653471	-0.108288	-0.0214705	-0.108288	0.0653471	0.159376	(0.05,0.5]
BAS1	BQI1	BAS	BQI	BAS1BQI1	Glycerol	-0.0284299	-1	-0.01173	-0.505865	-1	-0.01173	0.159376	(0.05,0.5]
BAS1	BRB1	BAS	BRB	BAS1BRB1	Glu+Sorbitol	0.0527642	0.0893175	0.109832	0.0995749	0.0893175	0.109832	0.261427	(0.05,0.5]
BAS1	BRB1	BAS	BRB	BAS1BRB1	Glucose	0.00606987	0.0653471	0.0350566	0.0502018	0.0350566	0.0653471	0.261427	(0.05,0.5]
BAS1	BRB1	BAS	BRB	BAS1BRB1	Glycerol	-0.0642913	-1	0.000627839	-0.499686	-1	0.000627839	0.261427	(0.05,0.5]
BAS1	BLP1	BAS	BLP	BAS1BLP1	Glu+Sorbitol	0.042162	0.0893175	0.159343	0.12433	0.0893175	0.159343	0.180035	(0.05,0.5]
BAS1	BLP1	BAS	BLP	BAS1BLP1	Glucose	-10	0.0653471	0.0477277	0.0565374	0.0477277	0.0653471	0.180035	(0.05,0.5]
BAS1	BLP1	BAS	BLP	BAS1BLP1	Glycerol	-0.0357456	-1	0.0191829	-0.490409	-1	0.0191829	0.180035	(0.05,0.5]
BAS1	BRC1	BAS	BRC	BAS1BRC1	Glu+Sorbitol	0.0228699	0.0893175	0.107766	0.0985416	0.0893175	0.107766	0.180973	(0.05,0.5]
BAS1	BRC1	BAS	BRC	BAS1BRC1	Glucose	-0.0116573	0.0653471	-0.0843597	-0.00950629	-0.0843597	0.0653471	0.180973	(0.05,0.5]
BAS1	BRC1	BAS	BRC	BAS1BRC1	Glycerol	-10	-1	-0.0845599	-0.54228	-1	-0.0845599	0.180973	(0.05,0.5]
BAS1	BPT1	BAS	BPT	BAS1BPT1	Glu+Sorbitol	0.0296763	0.0893175	0.0437225	0.06652	0.0437225	0.0893175	0.164283	(0.05,0.5]
BAS1	BPT1	BAS	BPT	BAS1BPT1	Glucose	-0.0371529	0.0653471	-0.0226414	0.0213528	-0.0226414	0.0653471	0.164283	(0.05,0.5]
BAS1	BPT1	BAS	BPT	BAS1BPT1	Glycerol	-1	-1	0.0527905	-0.473605	-1	0.0527905	0.164283	(0.05,0.5]
BAS1	BRD1	BAS	BRD	BAS1BRD1	Glu+Sorbitol	0.023744	0.0893175	0.0462453	0.0677814	0.0462453	0.0893175	0.14328	(0.05,0.5]
BAS1	BRD1	BAS	BRD	BAS1BRD1	Glucose	0.0146987	0.0653471	-0.0248454	0.0202508	-0.0248454	0.0653471	0.14328	(0.05,0.5]
BAS1	BRD1	BAS	BRD	BAS1BRD1	Glycerol	-0.0383178	-1	0.10436	-0.44782	-1	0.10436	0.14328	(0.05,0.5]
BAS1	BMK1	BAS	BMK	BAS1BMK1	Glu+Sorbitol	0.0307826	0.0893175	0.10245	0.0958838	0.0893175	0.10245	0.170829	(0.05,0.5]
BAS1	BMK1	BAS	BMK	BAS1BMK1	Glucose	-0.0339145	0.0653471	0.0206207	0.0429839	0.0206207	0.0653471	0.170829	(0.05,0.5]
BAS1	BMK1	BAS	BMK	BAS1BMK1	Glycerol	-1	-1	0.0727937	-0.463603	-1	0.0727937	0.170829	(0.05,0.5]
BAS1	BQP1	BAS	BQP	BAS1BQP1	Glu+Sorbitol	0.0434998	0.0893175	0.108223	0.0987704	0.0893175	0.108223	0.217816	(0.05,0.5]
BAS1	BQP1	BAS	BQP	BAS1BQP1	Glucose	-0.0240107	0.0653471	0.0119541	0.0386506	0.0119541	0.0653471	0.217816	(0.05,0.5]
BAS1	BQP1	BAS	BQP	BAS1BQP1	Glycerol	-10	-1	-0.0301991	-0.5151	-1	-0.0301991	0.217816	(0.05,0.5]
BAS1	BLV1	BAS	BLV	BAS1BLV1	Glu+Sorbitol	0.0833435	0.0893175	0.148788	0.119053	0.0893175	0.148788	0.180651	(0.05,0.5]
BAS1	BLV1	BAS	BLV	BAS1BLV1	Glucose	-10	0.0653471	-0.0681483	-0.00140059	-0.0681483	0.0653471	0.180651	(0.05,0.5]
BAS1	BLV1	BAS	BLV	BAS1BLV1	Glycerol	-1	-1	0.0838921	-0.458054	-1	0.0838921	0.180651	(0.05,0.5]
BAS1	BQQ1	BAS	BQQ	BAS1BQQ1	Glu+Sorbitol	-0.0842937	0.0893175	0.0432009	0.0662592	0.0432009	0.0893175	0.17554	(0.05,0.5]
BAS1	BQQ1	BAS	BQQ	BAS1BQQ1	Glucose	-0.0128497	0.0653471	0.0291802	0.0472636	0.0291802	0.0653471	0.17554	(0.05,0.5]
BAS1	BQQ1	BAS	BQQ	BAS1BQQ1	Glycerol	-10	-1	0.0824425	-0.458779	-1	0.0824425	0.17554	(0.05,0.5]
BAS1	BMA1	BAS	BMA	BAS1BMA1	Glu+Sorbitol	0.0279524	0.0893175	0.0267219	0.0580197	0.0267219	0.0893175	1.56364	(1, 1.5]
BAS1	BMA1	BAS	BMA	BAS1BMA1	Glucose	-0.0713966	0.0653471	0.0277247	0.0465359	0.0277247	0.0653471	1.56364	(1, 1.5]
BAS1	BMA1	BAS	BMA	BAS1BMA1	Glycerol	0.0315353	-1	0.0885346	-0.455733	-1	0.0885346	1.56364	(1, 1.5]
BAS1	BQR1	BAS	BQR	BAS1BQR1	Glu+Sorbitol	0.0675692	0.0893175	0.0524282	0.0708728	0.0524282	0.0893175	0.165911	(0.05,0.5]
BAS1	BQR1	BAS	BQR	BAS1BQR1	Glucose	-10	0.0653471	-0.0545715	0.00538776	-0.0545715	0.0653471	0.165911	(0.05,0.5]
BAS1	BQR1	BAS	BQR	BAS1BQR1	Glycerol	-0.0766558	-1	0.0588489	-0.470576	-1	0.0588489	0.165911	(0.05,0.5]
BAS1	CAD1	BAS	CAD	BAS1CAD1	Glu+Sorbitol	-10	0.0893175	0.0934632	0.0913903	0.0893175	0.0934632	0.325219	(0.05,0.5]
BAS1	CAD1	BAS	CAD	BAS1CAD1	Glucose	-10	0.0653471	-0.0194773	0.0229349	-0.0194773	0.0653471	0.325219	(0.05,0.5]
BAS1	CAD1	BAS	CAD	BAS1CAD1	Glycerol	-10	-1	-10	-5.5	-10	-1	0.325219	(0.05,0.5]
BAS1	BSB1	BAS	BSB	BAS1BSB1	Glu+Sorbitol	-10	0.0893175	-10	-4.95534	-10	0.0893175	0.166163	(0.05,0.5]
BAS1	BSB1	BAS	BSB	BAS1BSB1	Glucose	-10	0.0653471	-10	0.0653471	0.0653471	0.0653471	0.166163	(0.05,0.5]
BAS1	BSB1	BAS	BSB	BAS1BSB1	Glycerol	-10	-1	-10	-1	-1	-1	0.166163	(0.05,0.5]
BAS1	BTH1	BAS	BTH	BAS1BTH1	Glu+Sorbitol	-10	0.0893175	0.0555657	0.0724416	0.0555657	0.0893175	0.168268	(0.05,0.5]
BAS1	BTH1	BAS	BTH	BAS1BTH1	Glucose	-0.104717	0.0653471	-0.01391	0.0257185	-0.01391	0.0653471	0.168268	(0.05,0.5]
BAS1	BTH1	BAS	BTH	BAS1BTH1	Glycerol	-10	-1	-1	-1	-1	-1	0.168268	(0.05,0.5]
BAS1	AHP1	BAS	AHP	BAS1AHP1	Glu+Sorbitol	0.0857931	0.0893175	-1	-0.455341	-1	0.0893175	0.335172	(0.05,0.5]
BAS1	AHP1	BAS	AHP	BAS1AHP1	Glucose	-10	0.0653471	-1	-0.467326	-1	0.0653471	0.335172	(0.05,0.5]
BAS1	AHP1	BAS	AHP	BAS1AHP1	Glycerol	-0.166153	-1	0.0888156	-0.455592	-1	0.0888156	0.335172	(0.05,0.5]
BAS1	CQD1	BAS	CQD	BAS1CQD1	Glu+Sorbitol	-0.043224	0.0893175	0.0454048	0.0673612	0.0454048	0.0893175	0.765726	(0.5,1]
BAS1	CQD1	BAS	CQD	BAS1CQD1	Glucose	-0.0289809	0.0653471	0.0106465	0.0379968	0.0106465	0.0653471	0.765726	(0.5,1]
BAS1	CQD1	BAS	CQD	BAS1CQD1	Glycerol	-10	-1	-10	-5.5	-10	-1	0.765726	(0.5,1]
BAS1	APV1	BAS	APV	BAS1APV1	Glu+Sorbitol	0.0695524	0.0893175	0.0394829	0.0644002	0.0394829	0.0893175	0.167348	(0.05,0.5]
BAS1	APV1	BAS	APV	BAS1APV1	Glucose	-0.0365868	0.0653471	-0.0613302	0.00200844	-0.0613302	0.0653471	0.167348	(0.05,0.5]
BAS1	APV1	BAS	APV	BAS1APV1	Glycerol	-1	-1	0.176787	-0.411606	-1	0.176787	0.167348	(0.05,0.5]
BAS1	AST1	BAS	AST	BAS1AST1	Glu+Sorbitol	-0.0151692	0.0893175	-1	-0.455341	-1	0.0893175	0.306108	(0.05,0.5]
BAS1	AST1	BAS	AST	BAS1AST1	Glucose	0.00592216	0.0653471	0.0143308	0.0398389	0.0143308	0.0653471	0.306108	(0.05,0.5]
BAS1	AST1	BAS	AST	BAS1AST1	Glycerol	-0.121688	-1	-1	-1	-1	-1	0.306108	(0.05,0.5]
BAS1	CCV1	BAS	CCV	BAS1CCV1	Glu+Sorbitol	-0.0406347	0.0893175	0.107101	0.0982091	0.0893175	0.107101	1.45779	(1, 1.5]
BAS1	CCV1	BAS	CCV	BAS1CCV1	Glucose	-0.0250391	0.0653471	0.044604	0.0549755	0.044604	0.0653471	1.45779	(1, 1.5]
BAS1	CCV1	BAS	CCV	BAS1CCV1	Glycerol	-10	-1	-1	-1	-1	-1	1.45779	(1, 1.5]
BAS1	YAR1	BAS	YAR	BAS1YAR1	Glu+Sorbitol	-10	0.0893175	-1	-0.455341	-1	0.0893175	0.804875	(0.5,1]
BAS1	YAR1	BAS	YAR	BAS1YAR1	Glucose	-0.0401772	0.0653471	-0.0705407	-0.00259683	-0.0705407	0.0653471	0.804875	(0.5,1]
BAS1	YAR1	BAS	YAR	BAS1YAR1	Glycerol	-10	-1	-1	-1	-1	-1	0.804875	(0.5,1]
BAS1	YBU1	BAS	YBU	BAS1YBU1	Glu+Sorbitol	-10	0.0893175	-1	-0.455341	-1	0.0893175	1.0769	(0.5,1]
BAS1	YBU1	BAS	YBU	BAS1YBU1	Glucose	-10	0.0653471	-10	-4.96733	-10	0.0653471	1.0769	(0.5,1]
BAS1	YBU1	BAS	YBU	BAS1YBU1	Glycerol	-10	-1	-1	-1	-1	-1	1.0769	(0.5,1]
BBA1	AKB1	BBA	AKB	BBA1AKB1	Glu+Sorbitol	0.0673385	0.0865514	0.139707	0.113129	0.0865514	0.139707	1.53464	(1, 1.5]
BBA1	AKB1	BBA	AKB	BBA1AKB1	Glucose	0.0144304	0.0528759	-0.0154866	0.0186947	-0.0154866	0.0528759	1.53464	(1, 1.5]
BBA1	AKB1	BBA	AKB	BBA1AKB1	Glycerol	0.0132732	0.152729	-1	-0.423636	-1	0.152729	1.53464	(1, 1.5]
BBA1	AKP1	BBA	AKP	BBA1AKP1	Glu+Sorbitol	0.00699703	0.0865514	0.0982963	0.0924239	0.0865514	0.0982963	0.175036	(0.05,0.5]
BBA1	AKP1	BBA	AKP	BBA1AKP1	Glucose	-0.0159974	0.0528759	-0.0557565	-0.00144026	-0.0557565	0.0528759	0.175036	(0.05,0.5]
BBA1	AKP1	BBA	AKP	BBA1AKP1	Glycerol	-0.0392934	0.152729	-0.109008	0.0218602	-0.109008	0.152729	0.175036	(0.05,0.5]
BBA1	ALG1	BBA	ALG	BBA1ALG1	Glu+Sorbitol	-10	0.0865514	0.0868454	0.0866984	0.0865514	0.0868454	0.7706	(0.5,1]
BBA1	ALG1	BBA	ALG	BBA1ALG1	Glucose	-10	0.0528759	-0.141619	-0.0443713	-0.141619	0.0528759	0.7706	(0.5,1]
BBA1	ALG1	BBA	ALG	BBA1ALG1	Glycerol	-10	0.152729	-0.0464457	0.0531416	-0.0464457	0.152729	0.7706	(0.5,1]
BBA1	ANG1	BBA	ANG	BBA1ANG1	Glu+Sorbitol	-10	0.0865514	0.0628167	0.0746841	0.0628167	0.0865514	1.32499	(1, 1.5]
BBA1	ANG1	BBA	ANG	BBA1ANG1	Glucose	-10	0.0528759	0.0663533	0.0596146	0.0528759	0.0663533	1.32499	(1, 1.5]
BBA1	ANG1	BBA	ANG	BBA1ANG1	Glycerol	-10	0.152729	-1	-0.423636	-1	0.152729	1.32499	(1, 1.5]
BBA1	AIM1	BBA	AIM	BBA1AIM1	Glu+Sorbitol	-10	0.0865514	-1	-0.456724	-1	0.0865514	0.262475	(0.05,0.5]
BBA1	AIM1	BBA	AIM	BBA1AIM1	Glucose	-10	0.0528759	-10	-4.97356	-10	0.0528759	0.262475	(0.05,0.5]
BBA1	AIM1	BBA	AIM	BBA1AIM1	Glycerol	-10	0.152729	-10	-4.92364	-10	0.152729	0.262475	(0.05,0.5]
BBA1	AKV1	BBA	AKV	BBA1AKV1	Glu+Sorbitol	0.000736012	0.0865514	0.0943177	0.0904346	0.0865514	0.0943177	0.174933	(0.05,0.5]
BBA1	AKV1	BBA	AKV	BBA1AKV1	Glucose	-0.00277394	0.0528759	-0.033945	0.00946547	-0.033945	0.0528759	0.174933	(0.05,0.5]
BBA1	AKV1	BBA	AKV	BBA1AKV1	Glycerol	-0.0333091	0.152729	-0.0735332	0.0395978	-0.0735332	0.152729	0.174933	(0.05,0.5]
BBA1	BBI1	BBA	BBI	BBA1BBI1	Glu+Sorbitol	-10	0.0865514	0.242166	0.164359	0.0865514	0.242166	0.184256	(0.05,0.5]
BBA1	BBI1	BBA	BBI	BBA1BBI1	Glucose	-10	0.0528759	0.0118567	0.0323663	0.0118567	0.0528759	0.184256	(0.05,0.5]
BBA1	BBI1	BBA	BBI	BBA1BBI1	Glycerol	-10	0.152729	-0.0628554	0.0449367	-0.0628554	0.152729	0.184256	(0.05,0.5]
BBA1	BAK1	BBA	BAK	BBA1BAK1	Glu+Sorbitol	0.0555395	0.0865514	0.0545167	0.0705341	0.0545167	0.0865514	1.46611	(1, 1.5]
BBA1	BAK1	BBA	BAK	BBA1BAK1	Glucose	0.0583771	0.0528759	0.0639478	0.0584119	0.0528759	0.0639478	1.46611	(1, 1.5]
BBA1	BAK1	BBA	BAK	BBA1BAK1	Glycerol	0.0849899	0.152729	-0.00177197	0.0754784	-0.00177197	0.152729	1.46611	(1, 1.5]
BBA1	BEH1	BBA	BEH	BBA1BEH1	Glu+Sorbitol	-10	0.0865514	0.114205	0.100378	0.0865514	0.114205	1.46264	(1, 1.5]
BBA1	BEH1	BBA	BEH	BBA1BEH1	Glucose	-10	0.0528759	-0.0314472	0.0107144	-0.0314472	0.0528759	1.46264	(1, 1.5]
BBA1	BEH1	BBA	BEH	BBA1BEH1	Glycerol	-10	0.152729	-1	-0.423636	-1	0.152729	1.46264	(1, 1.5]
BBA1	BLA1	BBA	BLA	BBA1BLA1	Glu+Sorbitol	-0.0474385	0.0865514	-10	-4.95672	-10	0.0865514	0.164617	(0.05,0.5]
BBA1	BLA1	BBA	BLA	BBA1BLA1	Glucose	-0.0155374	0.0528759	-10	-4.97356	-10	0.0528759	0.164617	(0.05,0.5]
BBA1	BLA1	BBA	BLA	BBA1BLA1	Glycerol	-0.0502607	0.152729	-10	-4.92364	-10	0.152729	0.164617	(0.05,0.5]
BBA1	BHM1	BBA	BHM	BBA1BHM1	Glu+Sorbitol	-10	0.0865514	-1	-0.456724	-1	0.0865514	0.261349	(0.05,0.5]
BBA1	BHM1	BBA	BHM	BBA1BHM1	Glucose	-10	0.0528759	-10	-4.97356	-10	0.0528759	0.261349	(0.05,0.5]
BBA1	BHM1	BBA	BHM	BBA1BHM1	Glycerol	-10	0.152729	-1	-0.423636	-1	0.152729	0.261349	(0.05,0.5]
BBA1	BHN1	BBA	BHN	BBA1BHN1	Glu+Sorbitol	-0.0614075	0.0865514	0.00750642	0.0470289	0.00750642	0.0865514	0.179544	(0.05,0.5]
BBA1	BHN1	BBA	BHN	BBA1BHN1	Glucose	-0.0382457	0.0528759	-1	-0.473562	-1	0.0528759	0.179544	(0.05,0.5]
BBA1	BHN1	BBA	BHN	BBA1BHN1	Glycerol	-0.00428049	0.152729	-1	-0.423636	-1	0.152729	0.179544	(0.05,0.5]
BBA1	BHB1	BBA	BHB	BBA1BHB1	Glu+Sorbitol	-0.0724555	0.0865514	-1	-0.456724	-1	0.0865514	0.267382	(0.05,0.5]
BBA1	BHB1	BBA	BHB	BBA1BHB1	Glucose	-0.124875	0.0528759	-10	-4.97356	-10	0.0528759	0.267382	(0.05,0.5]
BBA1	BHB1	BBA	BHB	BBA1BHB1	Glycerol	-0.0278001	0.152729	-10	-4.92364	-10	0.152729	0.267382	(0.05,0.5]
BBA1	BLE1	BBA	BLE	BBA1BLE1	Glu+Sorbitol	-0.00367819	0.0865514	-1	-0.456724	-1	0.0865514	0.168205	(0.05,0.5]
BBA1	BLE1	BBA	BLE	BBA1BLE1	Glucose	-0.0314111	0.0528759	-0.0748489	-0.0109865	-0.0748489	0.0528759	0.168205	(0.05,0.5]
BBA1	BLE1	BBA	BLE	BBA1BLE1	Glycerol	-0.0882077	0.152729	-0.044381	0.0541739	-0.044381	0.152729	0.168205	(0.05,0.5]
BBA1	BHF1	BBA	BHF	BBA1BHF1	Glu+Sorbitol	-0.055362	0.0865514	0.0591106	0.072831	0.0591106	0.0865514	0.163112	(0.05,0.5]
BBA1	BHF1	BBA	BHF	BBA1BHF1	Glucose	-0.0262815	0.0528759	0.0612509	0.0570634	0.0528759	0.0612509	0.163112	(0.05,0.5]
BBA1	BHF1	BBA	BHF	BBA1BHF1	Glycerol	-0.0330236	0.152729	0.0945635	0.123646	0.0945635	0.152729	0.163112	(0.05,0.5]
BBA1	BKR1	BBA	BKR	BBA1BKR1	Glu+Sorbitol	-0.0722505	0.0865514	-1	-0.456724	-1	0.0865514	0.17653	(0.05,0.5]
BBA1	BKR1	BBA	BKR	BBA1BKR1	Glucose	-0.0808695	0.0528759	-0.013402	0.019737	-0.013402	0.0528759	0.17653	(0.05,0.5]
BBA1	BKR1	BBA	BKR	BBA1BKR1	Glycerol	0.00583373	0.152729	-1	-0.423636	-1	0.152729	0.17653	(0.05,0.5]
BBA1	BLL1	BBA	BLL	BBA1BLL1	Glu+Sorbitol	0.0102706	0.0865514	-1	-0.456724	-1	0.0865514	0.176041	(0.05,0.5]
BBA1	BLL1	BBA	BLL	BBA1BLL1	Glucose	-0.056195	0.0528759	-1	-0.473562	-1	0.0528759	0.176041	(0.05,0.5]
BBA1	BLL1	BBA	BLL	BBA1BLL1	Glycerol	-0.0253783	0.152729	0.120353	0.136541	0.120353	0.152729	0.176041	(0.05,0.5]
BBA1	BNI1	BBA	BNI	BBA1BNI1	Glu+Sorbitol	-10	0.0865514	-10	0.0865514	0.0865514	0.0865514	0.180921	(0.05,0.5]
BBA1	BNI1	BBA	BNI	BBA1BNI1	Glucose	-0.0238735	0.0528759	-10	0.0528759	0.0528759	0.0528759	0.180921	(0.05,0.5]
BBA1	BNI1	BBA	BNI	BBA1BNI1	Glycerol	-0.0494718	0.152729	-10	0.152729	0.152729	0.152729	0.180921	(0.05,0.5]
BBA1	BQG1	BBA	BQG	BBA1BQG1	Glu+Sorbitol	0.0937462	0.0865514	0.133013	0.109782	0.0865514	0.133013	0.17564	(0.05,0.5]
BBA1	BQG1	BBA	BQG	BBA1BQG1	Glucose	-0.0130763	0.0528759	-0.0571925	-0.00215827	-0.0571925	0.0528759	0.17564	(0.05,0.5]
BBA1	BQG1	BBA	BQG	BBA1BQG1	Glycerol	-0.0159594	0.152729	0.0537228	0.103226	0.0537228	0.152729	0.17564	(0.05,0.5]
BBA1	BNK1	BBA	BNK	BBA1BNK1	Glu+Sorbitol	0.0251607	0.0865514	-1	-0.456724	-1	0.0865514	0.164335	(0.05,0.5]
BBA1	BNK1	BBA	BNK	BBA1BNK1	Glucose	0.00762679	0.0528759	-0.0796816	-0.0134028	-0.0796816	0.0528759	0.164335	(0.05,0.5]
BBA1	BNK1	BBA	BNK	BBA1BNK1	Glycerol	-0.0341449	0.152729	0.115878	0.134303	0.115878	0.152729	0.164335	(0.05,0.5]
BBA1	BPQ1	BBA	BPQ	BBA1BPQ1	Glu+Sorbitol	0.0519684	0.0865514	0.196057	0.141304	0.0865514	0.196057	0.202803	(0.05,0.5]
BBA1	BPQ1	BBA	BPQ	BBA1BPQ1	Glucose	0.0346016	0.0528759	0.00714221	0.0300091	0.00714221	0.0528759	0.202803	(0.05,0.5]
BBA1	BPQ1	BBA	BPQ	BBA1BPQ1	Glycerol	-0.0431134	0.152729	0.0632255	0.107977	0.0632255	0.152729	0.202803	(0.05,0.5]
BBA1	BQH1	BBA	BQH	BBA1BQH1	Glu+Sorbitol	-0.0242906	0.0865514	0.00347705	0.0450142	0.00347705	0.0865514	0.169299	(0.05,0.5]
BBA1	BQH1	BBA	BQH	BBA1BQH1	Glucose	-10	0.0528759	0.0201877	0.0365318	0.0201877	0.0528759	0.169299	(0.05,0.5]
BBA1	BQH1	BBA	BQH	BBA1BQH1	Glycerol	-10	0.152729	-1	-0.423636	-1	0.152729	0.169299	(0.05,0.5]
BBA1	BRA1	BBA	BRA	BBA1BRA1	Glu+Sorbitol	-0.0122618	0.0865514	0.0670496	0.0768005	0.0670496	0.0865514	0.190598	(0.05,0.5]
BBA1	BRA1	BBA	BRA	BBA1BRA1	Glucose	-0.0141957	0.0528759	-0.0988197	-0.0229719	-0.0988197	0.0528759	0.190598	(0.05,0.5]
BBA1	BRA1	BBA	BRA	BBA1BRA1	Glycerol	0.0154544	0.152729	-1	-0.423636	-1	0.152729	0.190598	(0.05,0.5]
BBA1	BLN1	BBA	BLN	BBA1BLN1	Glu+Sorbitol	-10	0.0865514	-10	0.0865514	0.0865514	0.0865514	0.17273	(0.05,0.5]
BBA1	BLN1	BBA	BLN	BBA1BLN1	Glucose	-10	0.0528759	-10	0.0528759	0.0528759	0.0528759	0.17273	(0.05,0.5]
BBA1	BLN1	BBA	BLN	BBA1BLN1	Glycerol	-10	0.152729	-10	0.152729	0.152729	0.152729	0.17273	(0.05,0.5]
BBA1	BQI1	BBA	BQI	BBA1BQI1	Glu+Sorbitol	0.0974401	0.0865514	0.143956	0.115254	0.0865514	0.143956	0.163851	(0.05,0.5]
BBA1	BQI1	BBA	BQI	BBA1BQI1	Glucose	-0.00932843	0.0528759	-0.108288	-0.027706	-0.108288	0.0528759	0.163851	(0.05,0.5]
BBA1	BQI1	BBA	BQI	BBA1BQI1	Glycerol	0.0295143	0.152729	-0.01173	0.0704994	-0.01173	0.152729	0.163851	(0.05,0.5]
BBA1	BRB1	BBA	BRB	BBA1BRB1	Glu+Sorbitol	0.0332733	0.0865514	0.109832	0.0981919	0.0865514	0.109832	0.259039	(0.05,0.5]
BBA1	BRB1	BBA	BRB	BBA1BRB1	Glucose	0.0224062	0.0528759	0.0350566	0.0439663	0.0350566	0.0528759	0.259039	(0.05,0.5]
BBA1	BRB1	BBA	BRB	BBA1BRB1	Glycerol	-0.030954	0.152729	0.000627839	0.0766783	0.000627839	0.152729	0.259039	(0.05,0.5]
BBA1	BLP1	BBA	BLP	BBA1BLP1	Glu+Sorbitol	0.0799887	0.0865514	0.159343	0.122947	0.0865514	0.159343	0.173622	(0.05,0.5]
BBA1	BLP1	BBA	BLP	BBA1BLP1	Glucose	0.0139084	0.0528759	0.0477277	0.0503018	0.0477277	0.0528759	0.173622	(0.05,0.5]
BBA1	BLP1	BBA	BLP	BBA1BLP1	Glycerol	-0.0237789	0.152729	0.0191829	0.0859558	0.0191829	0.152729	0.173622	(0.05,0.5]
BBA1	BRC1	BBA	BRC	BBA1BRC1	Glu+Sorbitol	0.0458681	0.0865514	0.107766	0.0971586	0.0865514	0.107766	0.182923	(0.05,0.5]
BBA1	BRC1	BBA	BRC	BBA1BRC1	Glucose	0.00853384	0.0528759	-0.0843597	-0.0157419	-0.0843597	0.0528759	0.182923	(0.05,0.5]
BBA1	BRC1	BBA	BRC	BBA1BRC1	Glycerol	-0.0494254	0.152729	-0.0845599	0.0340844	-0.0845599	0.152729	0.182923	(0.05,0.5]
BBA1	BPT1	BBA	BPT	BBA1BPT1	Glu+Sorbitol	-0.00985266	0.0865514	0.0437225	0.0651369	0.0437225	0.0865514	0.170154	(0.05,0.5]
BBA1	BPT1	BBA	BPT	BBA1BPT1	Glucose	-0.0320378	0.0528759	-0.0226414	0.0151173	-0.0226414	0.0528759	0.170154	(0.05,0.5]
BBA1	BPT1	BBA	BPT	BBA1BPT1	Glycerol	-0.00952032	0.152729	0.0527905	0.10276	0.0527905	0.152729	0.170154	(0.05,0.5]
BBA1	BRD1	BBA	BRD	BBA1BRD1	Glu+Sorbitol	0.0347808	0.0865514	0.0462453	0.0663984	0.0462453	0.0865514	0.161399	(0.05,0.5]
BBA1	BRD1	BBA	BRD	BBA1BRD1	Glucose	0.0140909	0.0528759	-0.0248454	0.0140152	-0.0248454	0.0528759	0.161399	(0.05,0.5]
BBA1	BRD1	BBA	BRD	BBA1BRD1	Glycerol	0.0079503	0.152729	0.10436	0.128545	0.10436	0.152729	0.161399	(0.05,0.5]
BBA1	BMK1	BBA	BMK	BBA1BMK1	Glu+Sorbitol	0.034499	0.0865514	0.10245	0.0945008	0.0865514	0.10245	0.157373	(0.05,0.5]
BBA1	BMK1	BBA	BMK	BBA1BMK1	Glucose	-0.00568515	0.0528759	0.0206207	0.0367483	0.0206207	0.0528759	0.157373	(0.05,0.5]
BBA1	BMK1	BBA	BMK	BBA1BMK1	Glycerol	-0.0364989	0.152729	0.0727937	0.112761	0.0727937	0.152729	0.157373	(0.05,0.5]
BBA1	BQP1	BBA	BQP	BBA1BQP1	Glu+Sorbitol	0.0269457	0.0865514	0.108223	0.0973874	0.0865514	0.108223	0.213835	(0.05,0.5]
BBA1	BQP1	BBA	BQP	BBA1BQP1	Glucose	-0.0781471	0.0528759	0.0119541	0.032415	0.0119541	0.0528759	0.213835	(0.05,0.5]
BBA1	BQP1	BBA	BQP	BBA1BQP1	Glycerol	-10	0.152729	-0.0301991	0.0612649	-0.0301991	0.152729	0.213835	(0.05,0.5]
BBA1	BLV1	BBA	BLV	BBA1BLV1	Glu+Sorbitol	0.0436307	0.0865514	0.148788	0.11767	0.0865514	0.148788	0.175579	(0.05,0.5]
BBA1	BLV1	BBA	BLV	BBA1BLV1	Glucose	-0.00862938	0.0528759	-0.0681483	-0.00763616	-0.0681483	0.0528759	0.175579	(0.05,0.5]
BBA1	BLV1	BBA	BLV	BBA1BLV1	Glycerol	-0.0326311	0.152729	0.0838921	0.11831	0.0838921	0.152729	0.175579	(0.05,0.5]
BBA1	BQQ1	BBA	BQQ	BBA1BQQ1	Glu+Sorbitol	-0.170089	0.0865514	0.0432009	0.0648762	0.0432009	0.0865514	0.17307	(0.05,0.5]
BBA1	BQQ1	BBA	BQQ	BBA1BQQ1	Glucose	0.00677305	0.0528759	0.0291802	0.0410281	0.0291802	0.0528759	0.17307	(0.05,0.5]
BBA1	BQQ1	BBA	BQQ	BBA1BQQ1	Glycerol	-10	0.152729	0.0824425	0.117586	0.0824425	0.152729	0.17307	(0.05,0.5]
BBA1	BMA1	BBA	BMA	BBA1BMA1	Glu+Sorbitol	-0.00250298	0.0865514	0.0267219	0.0566367	0.0267219	0.0865514	1.56265	(1, 1.5]
BBA1	BMA1	BBA	BMA	BBA1BMA1	Glucose	-0.0623899	0.0528759	0.0277247	0.0403003	0.0277247	0.0528759	1.56265	(1, 1.5]
BBA1	BMA1	BBA	BMA	BBA1BMA1	Glycerol	0.0481845	0.152729	0.0885346	0.120632	0.0885346	0.152729	1.56265	(1, 1.5]
BBA1	BQR1	BBA	BQR	BBA1BQR1	Glu+Sorbitol	-0.000302964	0.0865514	0.0524282	0.0694898	0.0524282	0.0865514	0.164366	(0.05,0.5]
BBA1	BQR1	BBA	BQR	BBA1BQR1	Glucose	-0.0156897	0.0528759	-0.0545715	-0.000847799	-0.0545715	0.0528759	0.164366	(0.05,0.5]
BBA1	BQR1	BBA	BQR	BBA1BQR1	Glycerol	-0.00280405	0.152729	0.0588489	0.105789	0.0588489	0.152729	0.164366	(0.05,0.5]
BBA1	CAD1	BBA	CAD	BBA1CAD1	Glu+Sorbitol	-10	0.0865514	0.0934632	0.0900073	0.0865514	0.0934632	0.324378	(0.05,0.5]
BBA1	CAD1	BBA	CAD	BBA1CAD1	Glucose	-10	0.0528759	-0.0194773	0.0166993	-0.0194773	0.0528759	0.324378	(0.05,0.5]
BBA1	CAD1	BBA	CAD	BBA1CAD1	Glycerol	-10	0.152729	-10	-4.92364	-10	0.152729	0.324378	(0.05,0.5]
BBA1	BSB1	BBA	BSB	BBA1BSB1	Glu+Sorbitol	-10	0.0865514	-10	-4.95672	-10	0.0865514	0.160806	(0.05,0.5]
BBA1	BSB1	BBA	BSB	BBA1BSB1	Glucose	-10	0.0528759	-10	0.0528759	0.0528759	0.0528759	0.160806	(0.05,0.5]
BBA1	BSB1	BBA	BSB	BBA1BSB1	Glycerol	-10	0.152729	-10	0.152729	0.152729	0.152729	0.160806	(0.05,0.5]
BBA1	BTH1	BBA	BTH	BBA1BTH1	Glu+Sorbitol	-0.0285965	0.0865514	0.0555657	0.0710586	0.0555657	0.0865514	0.164236	(0.05,0.5]
BBA1	BTH1	BBA	BTH	BBA1BTH1	Glucose	-0.0345742	0.0528759	-0.01391	0.019483	-0.01391	0.0528759	0.164236	(0.05,0.5]
BBA1	BTH1	BBA	BTH	BBA1BTH1	Glycerol	-1	0.152729	-1	-0.423636	-1	0.152729	0.164236	(0.05,0.5]
BBA1	AHP1	BBA	AHP	BBA1AHP1	Glu+Sorbitol	-0.0102457	0.0865514	-1	-0.456724	-1	0.0865514	0.332718	(0.05,0.5]
BBA1	AHP1	BBA	AHP	BBA1AHP1	Glucose	-0.0824692	0.0528759	-1	-0.473562	-1	0.0528759	0.332718	(0.05,0.5]
BBA1	AHP1	BBA	AHP	BBA1AHP1	Glycerol	0.0110055	0.152729	0.0888156	0.120772	0.0888156	0.152729	0.332718	(0.05,0.5]
BBA1	CQD1	BBA	CQD	BBA1CQD1	Glu+Sorbitol	0.0210056	0.0865514	0.0454048	0.0659781	0.0454048	0.0865514	0.763898	(0.5,1]
BBA1	CQD1	BBA	CQD	BBA1CQD1	Glucose	0.007127	0.0528759	0.0106465	0.0317612	0.0106465	0.0528759	0.763898	(0.5,1]
BBA1	CQD1	BBA	CQD	BBA1CQD1	Glycerol	0.0218972	0.152729	-10	-4.92364	-10	0.152729	0.763898	(0.5,1]
BBA1	APV1	BBA	APV	BBA1APV1	Glu+Sorbitol	0.0246708	0.0865514	0.0394829	0.0630172	0.0394829	0.0865514	0.162419	(0.05,0.5]
BBA1	APV1	BBA	APV	BBA1APV1	Glucose	-0.0178482	0.0528759	-0.0613302	-0.00422712	-0.0613302	0.0528759	0.162419	(0.05,0.5]
BBA1	APV1	BBA	APV	BBA1APV1	Glycerol	-0.0260941	0.152729	0.176787	0.164758	0.152729	0.176787	0.162419	(0.05,0.5]
BBA1	AST1	BBA	AST	BBA1AST1	Glu+Sorbitol	0.0292883	0.0865514	-1	-0.456724	-1	0.0865514	0.300023	(0.05,0.5]
BBA1	AST1	BBA	AST	BBA1AST1	Glucose	0.0281694	0.0528759	0.0143308	0.0336034	0.0143308	0.0528759	0.300023	(0.05,0.5]
BBA1	AST1	BBA	AST	BBA1AST1	Glycerol	-0.0198302	0.152729	-1	-0.423636	-1	0.152729	0.300023	(0.05,0.5]
BBA1	CCV1	BBA	CCV	BBA1CCV1	Glu+Sorbitol	0.0218853	0.0865514	0.107101	0.0968261	0.0865514	0.107101	1.45603	(1, 1.5]
BBA1	CCV1	BBA	CCV	BBA1CCV1	Glucose	-0.0293445	0.0528759	0.044604	0.04874	0.044604	0.0528759	1.45603	(1, 1.5]
BBA1	CCV1	BBA	CCV	BBA1CCV1	Glycerol	-10	0.152729	-1	-0.423636	-1	0.152729	1.45603	(1, 1.5]
BBA1	YAR1	BBA	YAR	BBA1YAR1	Glu+Sorbitol	0.0262036	0.0865514	-1	-0.456724	-1	0.0865514	0.803998	(0.5,1]
BBA1	YAR1	BBA	YAR	BBA1YAR1	Glucose	0.0339771	0.0528759	-0.0705407	-0.00883239	-0.0705407	0.0528759	0.803998	(0.5,1]
BBA1	YAR1	BBA	YAR	BBA1YAR1	Glycerol	0.00665807	0.152729	-1	-0.423636	-1	0.152729	0.803998	(0.5,1]
BBA1	YBU1	BBA	YBU	BBA1YBU1	Glu+Sorbitol	-0.0604342	0.0865514	-1	-0.456724	-1	0.0865514	1.07418	(0.5,1]
BBA1	YBU1	BBA	YBU	BBA1YBU1	Glucose	-10	0.0528759	-10	-4.97356	-10	0.0528759	1.07418	(0.5,1]
BBA1	YBU1	BBA	YBU	BBA1YBU1	Glycerol	-0.0457835	0.152729	-1	-0.423636	-1	0.152729	1.07418	(0.5,1]
BEE1	AKB1	BEE	AKB	BEE1AKB1	Glu+Sorbitol	-10	-10	0.139707	-4.93015	-10	0.139707	1.83033	(1, 1.5]
BEE1	AKB1	BEE	AKB	BEE1AKB1	Glucose	-10	-1	-0.0154866	-0.507743	-1	-0.0154866	1.83033	(1, 1.5]
BEE1	AKB1	BEE	AKB	BEE1AKB1	Glycerol	-10	-10	-1	-5.5	-10	-1	1.83033	(1, 1.5]
BEE1	AKP1	BEE	AKP	BEE1AKP1	Glu+Sorbitol	-10	-10	0.0982963	-4.95085	-10	0.0982963	1.36952	(1, 1.5]
BEE1	AKP1	BEE	AKP	BEE1AKP1	Glucose	-10	-1	-0.0557565	-0.527878	-1	-0.0557565	1.36952	(1, 1.5]
BEE1	AKP1	BEE	AKP	BEE1AKP1	Glycerol	-10	-10	-0.109008	-5.0545	-10	-0.109008	1.36952	(1, 1.5]
BEE1	ALG1	BEE	ALG	BEE1ALG1	Glu+Sorbitol	-10	-10	0.0868454	-4.95658	-10	0.0868454	1.48193	(1, 1.5]
BEE1	ALG1	BEE	ALG	BEE1ALG1	Glucose	-10	-1	-0.141619	-0.570809	-1	-0.141619	1.48193	(1, 1.5]
BEE1	ALG1	BEE	ALG	BEE1ALG1	Glycerol	-10	-10	-0.0464457	-5.02322	-10	-0.0464457	1.48193	(1, 1.5]
BEE1	ANG1	BEE	ANG	BEE1ANG1	Glu+Sorbitol	-10	-10	0.0628167	-4.96859	-10	0.0628167	1.65413	(1, 1.5]
BEE1	ANG1	BEE	ANG	BEE1ANG1	Glucose	-10	-1	0.0663533	-0.466823	-1	0.0663533	1.65413	(1, 1.5]
BEE1	ANG1	BEE	ANG	BEE1ANG1	Glycerol	-10	-10	-1	-5.5	-10	-1	1.65413	(1, 1.5]
BEE1	AIM1	BEE	AIM	BEE1AIM1	Glu+Sorbitol	-10	-10	-1	-5.5	-10	-1	1.39421	(1, 1.5]
BEE1	AIM1	BEE	AIM	BEE1AIM1	Glucose	-10	-1	-10	-5.5	-10	-1	1.39421	(1, 1.5]
BEE1	AIM1	BEE	AIM	BEE1AIM1	Glycerol	-10	-10	-10	-10	-10	-10	1.39421	(1, 1.5]
BEE1	AKV1	BEE	AKV	BEE1AKV1	Glu+Sorbitol	-0.00501159	-10	0.0943177	-4.95284	-10	0.0943177	1.36958	(1, 1.5]
BEE1	AKV1	BEE	AKV	BEE1AKV1	Glucose	-10	-1	-0.033945	-0.516972	-1	-0.033945	1.36958	(1, 1.5]
BEE1	AKV1	BEE	AKV	BEE1AKV1	Glycerol	-10	-10	-0.0735332	-5.03677	-10	-0.0735332	1.36958	(1, 1.5]
BEE1	BBI1	BEE	BBI	BEE1BBI1	Glu+Sorbitol	-10	-10	0.242166	-4.87892	-10	0.242166	1.36733	(1, 1.5]
BEE1	BBI1	BEE	BBI	BEE1BBI1	Glucose	-10	-1	0.0118567	-0.494072	-1	0.0118567	1.36733	(1, 1.5]
BEE1	BBI1	BEE	BBI	BEE1BBI1	Glycerol	-10	-10	-0.0628554	-5.03143	-10	-0.0628554	1.36733	(1, 1.5]
BEE1	BAK1	BEE	BAK	BEE1BAK1	Glu+Sorbitol	-10	-10	0.0545167	-4.97274	-10	0.0545167	1.79059	(1, 1.5]
BEE1	BAK1	BEE	BAK	BEE1BAK1	Glucose	-10	-1	0.0639478	-0.468026	-1	0.0639478	1.79059	(1, 1.5]
BEE1	BAK1	BEE	BAK	BEE1BAK1	Glycerol	-10	-10	-0.00177197	-5.00089	-10	-0.00177197	1.79059	(1, 1.5]
BEE1	BEH1	BEE	BEH	BEE1BEH1	Glu+Sorbitol	-10	-10	0.114205	-4.9429	-10	0.114205	1.79207	(1, 1.5]
BEE1	BEH1	BEE	BEH	BEE1BEH1	Glucose	-10	-1	-0.0314472	-0.515724	-1	-0.0314472	1.79207	(1, 1.5]
BEE1	BEH1	BEE	BEH	BEE1BEH1	Glycerol	-10	-10	-1	-5.5	-10	-1	1.79207	(1, 1.5]
BEE1	BLA1	BEE	BLA	BEE1BLA1	Glu+Sorbitol	-10	-10	-10	-10	-10	-10	1.36973	(1, 1.5]
BEE1	BLA1	BEE	BLA	BEE1BLA1	Glucose	-10	-1	-10	-5.5	-10	-1	1.36973	(1, 1.5]
BEE1	BLA1	BEE	BLA	BEE1BLA1	Glycerol	-10	-10	-10	-10	-10	-10	1.36973	(1, 1.5]
BEE1	BHM1	BEE	BHM	BEE1BHM1	Glu+Sorbitol	-10	-10	-1	-5.5	-10	-1	1.38912	(1, 1.5]
BEE1	BHM1	BEE	BHM	BEE1BHM1	Glucose	-10	-1	-10	-5.5	-10	-1	1.38912	(1, 1.5]
BEE1	BHM1	BEE	BHM	BEE1BHM1	Glycerol	-10	-10	-1	-5.5	-10	-1	1.38912	(1, 1.5]
BEE1	BHN1	BEE	BHN	BEE1BHN1	Glu+Sorbitol	-10	-10	0.00750642	-4.99625	-10	0.00750642	1.37381	(1, 1.5]
BEE1	BHN1	BEE	BHN	BEE1BHN1	Glucose	-10	-1	-1	-1	-1	-1	1.37381	(1, 1.5]
BEE1	BHN1	BEE	BHN	BEE1BHN1	Glycerol	-10	-10	-1	-5.5	-10	-1	1.37381	(1, 1.5]
BEE1	BHB1	BEE	BHB	BEE1BHB1	Glu+Sorbitol	-10	-10	-1	-5.5	-10	-1	1.38876	(1, 1.5]
BEE1	BHB1	BEE	BHB	BEE1BHB1	Glucose	-10	-1	-10	-5.5	-10	-1	1.38876	(1, 1.5]
BEE1	BHB1	BEE	BHB	BEE1BHB1	Glycerol	-10	-10	-10	-10	-10	-10	1.38876	(1, 1.5]
BEE1	BLE1	BEE	BLE	BEE1BLE1	Glu+Sorbitol	-10	-10	-1	-5.5	-10	-1	1.37548	(1, 1.5]
BEE1	BLE1	BEE	BLE	BEE1BLE1	Glucose	-10	-1	-0.0748489	-0.537424	-1	-0.0748489	1.37548	(1, 1.5]
BEE1	BLE1	BEE	BLE	BEE1BLE1	Glycerol	-10	-10	-0.044381	-5.02219	-10	-0.044381	1.37548	(1, 1.5]
BEE1	BHF1	BEE	BHF	BEE1BHF1	Glu+Sorbitol	-10	-10	0.0591106	-4.97044	-10	0.0591106	1.3641	(1, 1.5]
BEE1	BHF1	BEE	BHF	BEE1BHF1	Glucose	-10	-1	0.0612509	-0.469375	-1	0.0612509	1.3641	(1, 1.5]
BEE1	BHF1	BEE	BHF	BEE1BHF1	Glycerol	-10	-10	0.0945635	-4.95272	-10	0.0945635	1.3641	(1, 1.5]
BEE1	BKR1	BEE	BKR	BEE1BKR1	Glu+Sorbitol	-10	-10	-1	-5.5	-10	-1	1.371	(1, 1.5]
BEE1	BKR1	BEE	BKR	BEE1BKR1	Glucose	-10	-1	-0.013402	-0.506701	-1	-0.013402	1.371	(1, 1.5]
BEE1	BKR1	BEE	BKR	BEE1BKR1	Glycerol	-10	-10	-1	-5.5	-10	-1	1.371	(1, 1.5]
BEE1	BLL1	BEE	BLL	BEE1BLL1	Glu+Sorbitol	-0.0595526	-10	-1	-5.5	-10	-1	1.37796	(1, 1.5]
BEE1	BLL1	BEE	BLL	BEE1BLL1	Glucose	-10	-1	-1	-1	-1	-1	1.37796	(1, 1.5]
BEE1	BLL1	BEE	BLL	BEE1BLL1	Glycerol	-0.0334878	-10	0.120353	-4.93982	-10	0.120353	1.37796	(1, 1.5]
BEE1	BNI1	BEE	BNI	BEE1BNI1	Glu+Sorbitol	-10	-10	-10	-10	-10	-10	1.37257	(1, 1.5]
BEE1	BNI1	BEE	BNI	BEE1BNI1	Glucose	-10	-1	-10	-1	-1	-1	1.37257	(1, 1.5]
BEE1	BNI1	BEE	BNI	BEE1BNI1	Glycerol	-10	-10	-10	-10	-10	-10	1.37257	(1, 1.5]
BEE1	BQG1	BEE	BQG	BEE1BQG1	Glu+Sorbitol	-10	-10	0.133013	-4.93349	-10	0.133013	1.37516	(1, 1.5]
BEE1	BQG1	BEE	BQG	BEE1BQG1	Glucose	-10	-1	-0.0571925	-0.528596	-1	-0.0571925	1.37516	(1, 1.5]
BEE1	BQG1	BEE	BQG	BEE1BQG1	Glycerol	-10	-10	0.0537228	-4.97314	-10	0.0537228	1.37516	(1, 1.5]
BEE1	BNK1	BEE	BNK	BEE1BNK1	Glu+Sorbitol	-1	-10	-1	-5.5	-10	-1	1.37285	(1, 1.5]
BEE1	BNK1	BEE	BNK	BEE1BNK1	Glucose	-10	-1	-0.0796816	-0.539841	-1	-0.0796816	1.37285	(1, 1.5]
BEE1	BNK1	BEE	BNK	BEE1BNK1	Glycerol	-10	-10	0.115878	-4.94206	-10	0.115878	1.37285	(1, 1.5]
BEE1	BPQ1	BEE	BPQ	BEE1BPQ1	Glu+Sorbitol	-10	-10	0.196057	-4.90197	-10	0.196057	1.3596	(1, 1.5]
BEE1	BPQ1	BEE	BPQ	BEE1BPQ1	Glucose	-10	-1	0.00714221	-0.496429	-1	0.00714221	1.3596	(1, 1.5]
BEE1	BPQ1	BEE	BPQ	BEE1BPQ1	Glycerol	-10	-10	0.0632255	-4.96839	-10	0.0632255	1.3596	(1, 1.5]
BEE1	BQH1	BEE	BQH	BEE1BQH1	Glu+Sorbitol	-10	-10	0.00347705	-4.99826	-10	0.00347705	1.37656	(1, 1.5]
BEE1	BQH1	BEE	BQH	BEE1BQH1	Glucose	-10	-1	0.0201877	-0.489906	-1	0.0201877	1.37656	(1, 1.5]
BEE1	BQH1	BEE	BQH	BEE1BQH1	Glycerol	-10	-10	-1	-5.5	-10	-1	1.37656	(1, 1.5]
BEE1	BRA1	BEE	BRA	BEE1BRA1	Glu+Sorbitol	-10	-10	0.0670496	-4.96648	-10	0.0670496	1.37614	(1, 1.5]
BEE1	BRA1	BEE	BRA	BEE1BRA1	Glucose	-10	-1	-0.0988197	-0.54941	-1	-0.0988197	1.37614	(1, 1.5]
BEE1	BRA1	BEE	BRA	BEE1BRA1	Glycerol	-10	-10	-1	-5.5	-10	-1	1.37614	(1, 1.5]
BEE1	BLN1	BEE	BLN	BEE1BLN1	Glu+Sorbitol	-10	-10	-10	-10	-10	-10	1.37686	(1, 1.5]
BEE1	BLN1	BEE	BLN	BEE1BLN1	Glucose	-10	-1	-10	-1	-1	-1	1.37686	(1, 1.5]
BEE1	BLN1	BEE	BLN	BEE1BLN1	Glycerol	-10	-10	-10	-10	-10	-10	1.37686	(1, 1.5]
BEE1	BQI1	BEE	BQI	BEE1BQI1	Glu+Sorbitol	-1	-10	0.143956	-4.92802	-10	0.143956	1.37258	(1, 1.5]
BEE1	BQI1	BEE	BQI	BEE1BQI1	Glucose	-10	-1	-0.108288	-0.554144	-1	-0.108288	1.37258	(1, 1.5]
BEE1	BQI1	BEE	BQI	BEE1BQI1	Glycerol	-10	-10	-0.01173	-5.00587	-10	-0.01173	1.37258	(1, 1.5]
BEE1	BRB1	BEE	BRB	BEE1BRB1	Glu+Sorbitol	-0.086039	-10	0.109832	-4.94508	-10	0.109832	1.39085	(1, 1.5]
BEE1	BRB1	BEE	BRB	BEE1BRB1	Glucose	-0.0459423	-1	0.0350566	-0.482472	-1	0.0350566	1.39085	(1, 1.5]
BEE1	BRB1	BEE	BRB	BEE1BRB1	Glycerol	-10	-10	0.000627839	-4.99969	-10	0.000627839	1.39085	(1, 1.5]
BEE1	BLP1	BEE	BLP	BEE1BLP1	Glu+Sorbitol	-10	-10	0.159343	-4.92033	-10	0.159343	1.37739	(1, 1.5]
BEE1	BLP1	BEE	BLP	BEE1BLP1	Glucose	-10	-1	0.0477277	-0.476136	-1	0.0477277	1.37739	(1, 1.5]
BEE1	BLP1	BEE	BLP	BEE1BLP1	Glycerol	-10	-10	0.0191829	-4.99041	-10	0.0191829	1.37739	(1, 1.5]
BEE1	BRC1	BEE	BRC	BEE1BRC1	Glu+Sorbitol	0.0018682	-10	0.107766	-4.94612	-10	0.107766	1.3618	(1, 1.5]
BEE1	BRC1	BEE	BRC	BEE1BRC1	Glucose	-10	-1	-0.0843597	-0.54218	-1	-0.0843597	1.3618	(1, 1.5]
BEE1	BRC1	BEE	BRC	BEE1BRC1	Glycerol	-10	-10	-0.0845599	-5.04228	-10	-0.0845599	1.3618	(1, 1.5]
BEE1	BPT1	BEE	BPT	BEE1BPT1	Glu+Sorbitol	-1	-10	0.0437225	-4.97814	-10	0.0437225	1.37254	(1, 1.5]
BEE1	BPT1	BEE	BPT	BEE1BPT1	Glucose	-10	-1	-0.0226414	-0.511321	-1	-0.0226414	1.37254	(1, 1.5]
BEE1	BPT1	BEE	BPT	BEE1BPT1	Glycerol	-10	-10	0.0527905	-4.9736	-10	0.0527905	1.37254	(1, 1.5]
BEE1	BRD1	BEE	BRD	BEE1BRD1	Glu+Sorbitol	-10	-10	0.0462453	-4.97688	-10	0.0462453	1.37121	(1, 1.5]
BEE1	BRD1	BEE	BRD	BEE1BRD1	Glucose	-10	-1	-0.0248454	-0.512423	-1	-0.0248454	1.37121	(1, 1.5]
BEE1	BRD1	BEE	BRD	BEE1BRD1	Glycerol	-10	-10	0.10436	-4.94782	-10	0.10436	1.37121	(1, 1.5]
BEE1	BMK1	BEE	BMK	BEE1BMK1	Glu+Sorbitol	-10	-10	0.10245	-4.94877	-10	0.10245	1.37312	(1, 1.5]
BEE1	BMK1	BEE	BMK	BEE1BMK1	Glucose	-10	-1	0.0206207	-0.48969	-1	0.0206207	1.37312	(1, 1.5]
BEE1	BMK1	BEE	BMK	BEE1BMK1	Glycerol	-10	-10	0.0727937	-4.9636	-10	0.0727937	1.37312	(1, 1.5]
BEE1	BQP1	BEE	BQP	BEE1BQP1	Glu+Sorbitol	-0.0547373	-10	0.108223	-4.94589	-10	0.108223	1.37624	(1, 1.5]
BEE1	BQP1	BEE	BQP	BEE1BQP1	Glucose	-10	-1	0.0119541	-0.494023	-1	0.0119541	1.37624	(1, 1.5]
BEE1	BQP1	BEE	BQP	BEE1BQP1	Glycerol	-10	-10	-0.0301991	-5.0151	-10	-0.0301991	1.37624	(1, 1.5]
BEE1	BLV1	BEE	BLV	BEE1BLV1	Glu+Sorbitol	-0.0843928	-10	0.148788	-4.92561	-10	0.148788	1.37492	(1, 1.5]
BEE1	BLV1	BEE	BLV	BEE1BLV1	Glucose	-10	-1	-0.0681483	-0.534074	-1	-0.0681483	1.37492	(1, 1.5]
BEE1	BLV1	BEE	BLV	BEE1BLV1	Glycerol	-10	-10	0.0838921	-4.95805	-10	0.0838921	1.37492	(1, 1.5]
BEE1	BQQ1	BEE	BQQ	BEE1BQQ1	Glu+Sorbitol	0.0257552	-10	0.0432009	-4.9784	-10	0.0432009	1.37162	(1, 1.5]
BEE1	BQQ1	BEE	BQQ	BEE1BQQ1	Glucose	-10	-1	0.0291802	-0.48541	-1	0.0291802	1.37162	(1, 1.5]
BEE1	BQQ1	BEE	BQQ	BEE1BQQ1	Glycerol	-10	-10	0.0824425	-4.95878	-10	0.0824425	1.37162	(1, 1.5]
BEE1	BMA1	BEE	BMA	BEE1BMA1	Glu+Sorbitol	-10	-10	0.0267219	-4.98664	-10	0.0267219	1.88706	(1, 1.5]
BEE1	BMA1	BEE	BMA	BEE1BMA1	Glucose	-10	-1	0.0277247	-0.486138	-1	0.0277247	1.88706	(1, 1.5]
BEE1	BMA1	BEE	BMA	BEE1BMA1	Glycerol	-10	-10	0.0885346	-4.95573	-10	0.0885346	1.88706	(1, 1.5]
BEE1	BQR1	BEE	BQR	BEE1BQR1	Glu+Sorbitol	-10	-10	0.0524282	-4.97379	-10	0.0524282	1.37244	(1, 1.5]
BEE1	BQR1	BEE	BQR	BEE1BQR1	Glucose	-10	-1	-0.0545715	-0.527286	-1	-0.0545715	1.37244	(1, 1.5]
BEE1	BQR1	BEE	BQR	BEE1BQR1	Glycerol	-10	-10	0.0588489	-4.97058	-10	0.0588489	1.37244	(1, 1.5]
BEE1	CAD1	BEE	CAD	BEE1CAD1	Glu+Sorbitol	-10	-10	0.0934632	-4.95327	-10	0.0934632	1.40197	(1, 1.5]
BEE1	CAD1	BEE	CAD	BEE1CAD1	Glucose	-10	-1	-0.0194773	-0.509739	-1	-0.0194773	1.40197	(1, 1.5]
BEE1	CAD1	BEE	CAD	BEE1CAD1	Glycerol	-10	-10	-10	-10	-10	-10	1.40197	(1, 1.5]
BEE1	BSB1	BEE	BSB	BEE1BSB1	Glu+Sorbitol	-10	-10	-10	-10	-10	-10	1.37246	(1, 1.5]
BEE1	BSB1	BEE	BSB	BEE1BSB1	Glucose	-10	-1	-10	-1	-1	-1	1.37246	(1, 1.5]
BEE1	BSB1	BEE	BSB	BEE1BSB1	Glycerol	-10	-10	-10	-10	-10	-10	1.37246	(1, 1.5]
BEE1	BTH1	BEE	BTH	BEE1BTH1	Glu+Sorbitol	-10	-10	0.0555657	-4.97222	-10	0.0555657	1.36663	(1, 1.5]
BEE1	BTH1	BEE	BTH	BEE1BTH1	Glucose	-10	-1	-0.01391	-0.506955	-1	-0.01391	1.36663	(1, 1.5]
BEE1	BTH1	BEE	BTH	BEE1BTH1	Glycerol	-10	-10	-1	-5.5	-10	-1	1.36663	(1, 1.5]
BEE1	AHP1	BEE	AHP	BEE1AHP1	Glu+Sorbitol	-10	-10	-1	-5.5	-10	-1	1.40817	(1, 1.5]
BEE1	AHP1	BEE	AHP	BEE1AHP1	Glucose	-10	-1	-1	-1	-1	-1	1.40817	(1, 1.5]
BEE1	AHP1	BEE	AHP	BEE1AHP1	Glycerol	-10	-10	0.0888156	-4.95559	-10	0.0888156	1.40817	(1, 1.5]
BEE1	CQD1	BEE	CQD	BEE1CQD1	Glu+Sorbitol	-10	-10	0.0454048	-4.9773	-10	0.0454048	1.54665	(1, 1.5]
BEE1	CQD1	BEE	CQD	BEE1CQD1	Glucose	-10	-1	0.0106465	-0.494677	-1	0.0106465	1.54665	(1, 1.5]
BEE1	CQD1	BEE	CQD	BEE1CQD1	Glycerol	-10	-10	-10	-10	-10	-10	1.54665	(1, 1.5]
BEE1	APV1	BEE	APV	BEE1APV1	Glu+Sorbitol	0.00547627	-10	0.0394829	-4.98026	-10	0.0394829	1.37249	(1, 1.5]
BEE1	APV1	BEE	APV	BEE1APV1	Glucose	-10	-1	-0.0613302	-0.530665	-1	-0.0613302	1.37249	(1, 1.5]
BEE1	APV1	BEE	APV	BEE1APV1	Glycerol	-10	-10	0.176787	-4.91161	-10	0.176787	1.37249	(1, 1.5]
BEE1	AST1	BEE	AST	BEE1AST1	Glu+Sorbitol	-10	-10	-1	-5.5	-10	-1	1.39188	(1, 1.5]
BEE1	AST1	BEE	AST	BEE1AST1	Glucose	-10	-1	0.0143308	-0.492835	-1	0.0143308	1.39188	(1, 1.5]
BEE1	AST1	BEE	AST	BEE1AST1	Glycerol	-10	-10	-1	-5.5	-10	-1	1.39188	(1, 1.5]
BEE1	CCV1	BEE	CCV	BEE1CCV1	Glu+Sorbitol	-10	-10	0.107101	-4.94645	-10	0.107101	1.78419	(1, 1.5]
BEE1	CCV1	BEE	CCV	BEE1CCV1	Glucose	-10	-1	0.044604	-0.477698	-1	0.044604	1.78419	(1, 1.5]
BEE1	CCV1	BEE	CCV	BEE1CCV1	Glycerol	-10	-10	-1	-5.5	-10	-1	1.78419	(1, 1.5]
BEE1	YAR1	BEE	YAR	BEE1YAR1	Glu+Sorbitol	-10	-10	-1	-5.5	-10	-1	1.53407	(1, 1.5]
BEE1	YAR1	BEE	YAR	BEE1YAR1	Glucose	-10	-1	-0.0705407	-0.53527	-1	-0.0705407	1.53407	(1, 1.5]
BEE1	YAR1	BEE	YAR	BEE1YAR1	Glycerol	-10	-10	-1	-5.5	-10	-1	1.53407	(1, 1.5]
BEE1	YBU1	BEE	YBU	BEE1YBU1	Glu+Sorbitol	-10	-10	-1	-5.5	-10	-1	1.65277	(1, 1.5]
BEE1	YBU1	BEE	YBU	BEE1YBU1	Glucose	-10	-1	-10	-5.5	-10	-1	1.65277	(1, 1.5]
BEE1	YBU1	BEE	YBU	BEE1YBU1	Glycerol	-10	-10	-1	-5.5	-10	-1	1.65277	(1, 1.5]
BIM1	AKB1	BIM	AKB	BIM1AKB1	Glu+Sorbitol	-10	0.006083	0.139707	0.0728949	0.006083	0.139707	1.53727	(1, 1.5]
BIM1	AKB1	BIM	AKB	BIM1AKB1	Glucose	-10	0.0466863	-0.0154866	0.0155999	-0.0154866	0.0466863	1.53727	(1, 1.5]
BIM1	AKB1	BIM	AKB	BIM1AKB1	Glycerol	-10	-1	-1	-1	-1	-1	1.53727	(1, 1.5]
BIM1	AKP1	BIM	AKP	BIM1AKP1	Glu+Sorbitol	-0.104766	0.006083	0.0982963	0.0521897	0.006083	0.0982963	0.185374	(0.05,0.5]
BIM1	AKP1	BIM	AKP	BIM1AKP1	Glucose	-0.0230696	0.0466863	-0.0557565	-0.00453508	-0.0557565	0.0466863	0.185374	(0.05,0.5]
BIM1	AKP1	BIM	AKP	BIM1AKP1	Glycerol	-10	-1	-0.109008	-0.554504	-1	-0.109008	0.185374	(0.05,0.5]
BIM1	ALG1	BIM	ALG	BIM1ALG1	Glu+Sorbitol	-10	0.006083	0.0868454	0.0464642	0.006083	0.0868454	0.777101	(0.5,1]
BIM1	ALG1	BIM	ALG	BIM1ALG1	Glucose	-10	0.0466863	-0.141619	-0.0474661	-0.141619	0.0466863	0.777101	(0.5,1]
BIM1	ALG1	BIM	ALG	BIM1ALG1	Glycerol	-10	-1	-0.0464457	-0.523223	-1	-0.0464457	0.777101	(0.5,1]
BIM1	ANG1	BIM	ANG	BIM1ANG1	Glu+Sorbitol	-10	0.006083	0.0628167	0.0344498	0.006083	0.0628167	1.32743	(1, 1.5]
BIM1	ANG1	BIM	ANG	BIM1ANG1	Glucose	-10	0.0466863	0.0663533	0.0565198	0.0466863	0.0663533	1.32743	(1, 1.5]
BIM1	ANG1	BIM	ANG	BIM1ANG1	Glycerol	-10	-1	-1	-1	-1	-1	1.32743	(1, 1.5]
BIM1	AIM1	BIM	AIM	BIM1AIM1	Glu+Sorbitol	-10	0.006083	-1	-0.496959	-1	0.006083	0.26961	(0.05,0.5]
BIM1	AIM1	BIM	AIM	BIM1AIM1	Glucose	-10	0.0466863	-10	-4.97666	-10	0.0466863	0.26961	(0.05,0.5]
BIM1	AIM1	BIM	AIM	BIM1AIM1	Glycerol	-10	-1	-10	-5.5	-10	-1	0.26961	(0.05,0.5]
BIM1	AKV1	BIM	AKV	BIM1AKV1	Glu+Sorbitol	-0.023869	0.006083	0.0943177	0.0502003	0.006083	0.0943177	0.185474	(0.05,0.5]
BIM1	AKV1	BIM	AKV	BIM1AKV1	Glucose	-0.0512311	0.0466863	-0.033945	0.00637065	-0.033945	0.0466863	0.185474	(0.05,0.5]
BIM1	AKV1	BIM	AKV	BIM1AKV1	Glycerol	-10	-1	-0.0735332	-0.536767	-1	-0.0735332	0.185474	(0.05,0.5]
BIM1	BBI1	BIM	BBI	BIM1BBI1	Glu+Sorbitol	-10	0.006083	0.242166	0.124124	0.006083	0.242166	0.191963	(0.05,0.5]
BIM1	BBI1	BIM	BBI	BIM1BBI1	Glucose	-10	0.0466863	0.0118567	0.0292715	0.0118567	0.0466863	0.191963	(0.05,0.5]
BIM1	BBI1	BIM	BBI	BIM1BBI1	Glycerol	-10	-1	-0.0628554	-0.531428	-1	-0.0628554	0.191963	(0.05,0.5]
BIM1	BAK1	BIM	BAK	BIM1BAK1	Glu+Sorbitol	0.0276717	0.006083	0.0545167	0.0302999	0.006083	0.0545167	1.46994	(1, 1.5]
BIM1	BAK1	BIM	BAK	BIM1BAK1	Glucose	0.0682516	0.0466863	0.0639478	0.0553171	0.0466863	0.0639478	1.46994	(1, 1.5]
BIM1	BAK1	BIM	BAK	BIM1BAK1	Glycerol	-10	-1	-0.00177197	-0.500886	-1	-0.00177197	1.46994	(1, 1.5]
BIM1	BEH1	BIM	BEH	BIM1BEH1	Glu+Sorbitol	-10	0.006083	0.114205	0.0601439	0.006083	0.114205	1.46479	(1, 1.5]
BIM1	BEH1	BIM	BEH	BIM1BEH1	Glucose	-10	0.0466863	-0.0314472	0.00761953	-0.0314472	0.0466863	1.46479	(1, 1.5]
BIM1	BEH1	BIM	BEH	BIM1BEH1	Glycerol	-10	-1	-1	-1	-1	-1	1.46479	(1, 1.5]
BIM1	BLA1	BIM	BLA	BIM1BLA1	Glu+Sorbitol	-10	0.006083	-10	-4.99696	-10	0.006083	0.173472	(0.05,0.5]
BIM1	BLA1	BIM	BLA	BIM1BLA1	Glucose	-10	0.0466863	-10	-4.97666	-10	0.0466863	0.173472	(0.05,0.5]
BIM1	BLA1	BIM	BLA	BIM1BLA1	Glycerol	-10	-1	-10	-5.5	-10	-1	0.173472	(0.05,0.5]
BIM1	BHM1	BIM	BHM	BIM1BHM1	Glu+Sorbitol	-10	0.006083	-1	-0.496959	-1	0.006083	0.268591	(0.05,0.5]
BIM1	BHM1	BIM	BHM	BIM1BHM1	Glucose	-10	0.0466863	-10	-4.97666	-10	0.0466863	0.268591	(0.05,0.5]
BIM1	BHM1	BIM	BHM	BIM1BHM1	Glycerol	-10	-1	-1	-1	-1	-1	0.268591	(0.05,0.5]
BIM1	BHN1	BIM	BHN	BIM1BHN1	Glu+Sorbitol	-0.239906	0.006083	0.00750642	0.00679471	0.006083	0.00750642	0.200899	(0.05,0.5]
BIM1	BHN1	BIM	BHN	BIM1BHN1	Glucose	-0.0675389	0.0466863	-1	-0.476657	-1	0.0466863	0.200899	(0.05,0.5]
BIM1	BHN1	BIM	BHN	BIM1BHN1	Glycerol	-10	-1	-1	-1	-1	-1	0.200899	(0.05,0.5]
BIM1	BHB1	BIM	BHB	BIM1BHB1	Glu+Sorbitol	0.0657549	0.006083	-1	-0.496959	-1	0.006083	0.278528	(0.05,0.5]
BIM1	BHB1	BIM	BHB	BIM1BHB1	Glucose	-0.174509	0.0466863	-10	-4.97666	-10	0.0466863	0.278528	(0.05,0.5]
BIM1	BHB1	BIM	BHB	BIM1BHB1	Glycerol	-10	-1	-10	-5.5	-10	-1	0.278528	(0.05,0.5]
BIM1	BLE1	BIM	BLE	BIM1BLE1	Glu+Sorbitol	-10	0.006083	-1	-0.496959	-1	0.006083	0.182801	(0.05,0.5]
BIM1	BLE1	BIM	BLE	BIM1BLE1	Glucose	-10	0.0466863	-0.0748489	-0.0140813	-0.0748489	0.0466863	0.182801	(0.05,0.5]
BIM1	BLE1	BIM	BLE	BIM1BLE1	Glycerol	-10	-1	-0.044381	-0.52219	-1	-0.044381	0.182801	(0.05,0.5]
BIM1	BHF1	BIM	BHF	BIM1BHF1	Glu+Sorbitol	-10	0.006083	0.0591106	0.0325968	0.006083	0.0591106	0.173462	(0.05,0.5]
BIM1	BHF1	BIM	BHF	BIM1BHF1	Glucose	-10	0.0466863	0.0612509	0.0539686	0.0466863	0.0612509	0.173462	(0.05,0.5]
BIM1	BHF1	BIM	BHF	BIM1BHF1	Glycerol	-10	-1	0.0945635	-0.452718	-1	0.0945635	0.173462	(0.05,0.5]
BIM1	BKR1	BIM	BKR	BIM1BKR1	Glu+Sorbitol	-10	0.006083	-1	-0.496959	-1	0.006083	0.185481	(0.05,0.5]
BIM1	BKR1	BIM	BKR	BIM1BKR1	Glucose	-10	0.0466863	-0.013402	0.0166421	-0.013402	0.0466863	0.185481	(0.05,0.5]
BIM1	BKR1	BIM	BKR	BIM1BKR1	Glycerol	-10	-1	-1	-1	-1	-1	0.185481	(0.05,0.5]
BIM1	BLL1	BIM	BLL	BIM1BLL1	Glu+Sorbitol	-10	0.006083	-1	-0.496959	-1	0.006083	0.18516	(0.05,0.5]
BIM1	BLL1	BIM	BLL	BIM1BLL1	Glucose	-10	0.0466863	-1	-0.476657	-1	0.0466863	0.18516	(0.05,0.5]
BIM1	BLL1	BIM	BLL	BIM1BLL1	Glycerol	-10	-1	0.120353	-0.439823	-1	0.120353	0.18516	(0.05,0.5]
BIM1	BNI1	BIM	BNI	BIM1BNI1	Glu+Sorbitol	-10	0.006083	-10	0.006083	0.006083	0.006083	0.176608	(0.05,0.5]
BIM1	BNI1	BIM	BNI	BIM1BNI1	Glucose	-10	0.0466863	-10	0.0466863	0.0466863	0.0466863	0.176608	(0.05,0.5]
BIM1	BNI1	BIM	BNI	BIM1BNI1	Glycerol	-10	-1	-10	-1	-1	-1	0.176608	(0.05,0.5]
BIM1	BQG1	BIM	BQG	BIM1BQG1	Glu+Sorbitol	0.0255328	0.006083	0.133013	0.0695479	0.006083	0.133013	0.176541	(0.05,0.5]
BIM1	BQG1	BIM	BQG	BIM1BQG1	Glucose	-10	0.0466863	-0.0571925	-0.00525309	-0.0571925	0.0466863	0.176541	(0.05,0.5]
BIM1	BQG1	BIM	BQG	BIM1BQG1	Glycerol	-10	-1	0.0537228	-0.473139	-1	0.0537228	0.176541	(0.05,0.5]
BIM1	BNK1	BIM	BNK	BIM1BNK1	Glu+Sorbitol	-0.0949219	0.006083	-1	-0.496959	-1	0.006083	0.178428	(0.05,0.5]
BIM1	BNK1	BIM	BNK	BIM1BNK1	Glucose	-10	0.0466863	-0.0796816	-0.0164976	-0.0796816	0.0466863	0.178428	(0.05,0.5]
BIM1	BNK1	BIM	BNK	BIM1BNK1	Glycerol	-10	-1	0.115878	-0.442061	-1	0.115878	0.178428	(0.05,0.5]
BIM1	BPQ1	BIM	BPQ	BIM1BPQ1	Glu+Sorbitol	0.0535659	0.006083	0.196057	0.10107	0.006083	0.196057	0.207317	(0.05,0.5]
BIM1	BPQ1	BIM	BPQ	BIM1BPQ1	Glucose	-0.0163107	0.0466863	0.00714221	0.0269143	0.00714221	0.0466863	0.207317	(0.05,0.5]
BIM1	BPQ1	BIM	BPQ	BIM1BPQ1	Glycerol	-1	-1	0.0632255	-0.468387	-1	0.0632255	0.207317	(0.05,0.5]
BIM1	BQH1	BIM	BQH	BIM1BQH1	Glu+Sorbitol	-1	0.006083	0.00347705	0.00478002	0.00347705	0.006083	0.181325	(0.05,0.5]
BIM1	BQH1	BIM	BQH	BIM1BQH1	Glucose	-10	0.0466863	0.0201877	0.033437	0.0201877	0.0466863	0.181325	(0.05,0.5]
BIM1	BQH1	BIM	BQH	BIM1BQH1	Glycerol	-10	-1	-1	-1	-1	-1	0.181325	(0.05,0.5]
BIM1	BRA1	BIM	BRA	BIM1BRA1	Glu+Sorbitol	-10	0.006083	0.0670496	0.0365663	0.006083	0.0670496	0.202946	(0.05,0.5]
BIM1	BRA1	BIM	BRA	BIM1BRA1	Glucose	-10	0.0466863	-0.0988197	-0.0260667	-0.0988197	0.0466863	0.202946	(0.05,0.5]
BIM1	BRA1	BIM	BRA	BIM1BRA1	Glycerol	-10	-1	-1	-1	-1	-1	0.202946	(0.05,0.5]
BIM1	BLN1	BIM	BLN	BIM1BLN1	Glu+Sorbitol	-10	0.006083	-10	0.006083	0.006083	0.006083	0.179505	(0.05,0.5]
BIM1	BLN1	BIM	BLN	BIM1BLN1	Glucose	-10	0.0466863	-10	0.0466863	0.0466863	0.0466863	0.179505	(0.05,0.5]
BIM1	BLN1	BIM	BLN	BIM1BLN1	Glycerol	-10	-1	-10	-1	-1	-1	0.179505	(0.05,0.5]
BIM1	BQI1	BIM	BQI	BIM1BQI1	Glu+Sorbitol	0.00917435	0.006083	0.143956	0.0750195	0.006083	0.143956	0.17578	(0.05,0.5]
BIM1	BQI1	BIM	BQI	BIM1BQI1	Glucose	-0.0534772	0.0466863	-0.108288	-0.0308009	-0.108288	0.0466863	0.17578	(0.05,0.5]
BIM1	BQI1	BIM	BQI	BIM1BQI1	Glycerol	-10	-1	-0.01173	-0.505865	-1	-0.01173	0.17578	(0.05,0.5]
BIM1	BRB1	BIM	BRB	BIM1BRB1	Glu+Sorbitol	-0.0571238	0.006083	0.109832	0.0579577	0.006083	0.109832	0.268963	(0.05,0.5]
BIM1	BRB1	BIM	BRB	BIM1BRB1	Glucose	0.013968	0.0466863	0.0350566	0.0408714	0.0350566	0.0466863	0.268963	(0.05,0.5]
BIM1	BRB1	BIM	BRB	BIM1BRB1	Glycerol	-10	-1	0.000627839	-0.499686	-1	0.000627839	0.268963	(0.05,0.5]
BIM1	BLP1	BIM	BLP	BIM1BLP1	Glu+Sorbitol	-10	0.006083	0.159343	0.0827132	0.006083	0.159343	0.179931	(0.05,0.5]
BIM1	BLP1	BIM	BLP	BIM1BLP1	Glucose	-10	0.0466863	0.0477277	0.047207	0.0466863	0.0477277	0.179931	(0.05,0.5]
BIM1	BLP1	BIM	BLP	BIM1BLP1	Glycerol	-10	-1	0.0191829	-0.490409	-1	0.0191829	0.179931	(0.05,0.5]
BIM1	BRC1	BIM	BRC	BIM1BRC1	Glu+Sorbitol	-0.0388445	0.006083	0.107766	0.0569244	0.006083	0.107766	0.187173	(0.05,0.5]
BIM1	BRC1	BIM	BRC	BIM1BRC1	Glucose	-0.00497353	0.0466863	-0.0843597	-0.0188367	-0.0843597	0.0466863	0.187173	(0.05,0.5]
BIM1	BRC1	BIM	BRC	BIM1BRC1	Glycerol	-10	-1	-0.0845599	-0.54228	-1	-0.0845599	0.187173	(0.05,0.5]
BIM1	BPT1	BIM	BPT	BIM1BPT1	Glu+Sorbitol	-10	0.006083	0.0437225	0.0249027	0.006083	0.0437225	0.178352	(0.05,0.5]
BIM1	BPT1	BIM	BPT	BIM1BPT1	Glucose	-10	0.0466863	-0.0226414	0.0120225	-0.0226414	0.0466863	0.178352	(0.05,0.5]
BIM1	BPT1	BIM	BPT	BIM1BPT1	Glycerol	-10	-1	0.0527905	-0.473605	-1	0.0527905	0.178352	(0.05,0.5]
BIM1	BRD1	BIM	BRD	BIM1BRD1	Glu+Sorbitol	-0.02984	0.006083	0.0462453	0.0261641	0.006083	0.0462453	0.175063	(0.05,0.5]
BIM1	BRD1	BIM	BRD	BIM1BRD1	Glucose	-0.00559683	0.0466863	-0.0248454	0.0109204	-0.0248454	0.0466863	0.175063	(0.05,0.5]
BIM1	BRD1	BIM	BRD	BIM1BRD1	Glycerol	-10	-1	0.10436	-0.44782	-1	0.10436	0.175063	(0.05,0.5]
BIM1	BMK1	BIM	BMK	BIM1BMK1	Glu+Sorbitol	-0.0496565	0.006083	0.10245	0.0542666	0.006083	0.10245	0.177016	(0.05,0.5]
BIM1	BMK1	BIM	BMK	BIM1BMK1	Glucose	-10	0.0466863	0.0206207	0.0336535	0.0206207	0.0466863	0.177016	(0.05,0.5]
BIM1	BMK1	BIM	BMK	BIM1BMK1	Glycerol	-10	-1	0.0727937	-0.463603	-1	0.0727937	0.177016	(0.05,0.5]
BIM1	BQP1	BIM	BQP	BIM1BQP1	Glu+Sorbitol	-0.0407912	0.006083	0.108223	0.0571532	0.006083	0.108223	0.225921	(0.05,0.5]
BIM1	BQP1	BIM	BQP	BIM1BQP1	Glucose	-0.110877	0.0466863	0.0119541	0.0293202	0.0119541	0.0466863	0.225921	(0.05,0.5]
BIM1	BQP1	BIM	BQP	BIM1BQP1	Glycerol	-10	-1	-0.0301991	-0.5151	-1	-0.0301991	0.225921	(0.05,0.5]
BIM1	BLV1	BIM	BLV	BIM1BLV1	Glu+Sorbitol	-10	0.006083	0.148788	0.0774355	0.006083	0.148788	0.176492	(0.05,0.5]
BIM1	BLV1	BIM	BLV	BIM1BLV1	Glucose	-10	0.0466863	-0.0681483	-0.010731	-0.0681483	0.0466863	0.176492	(0.05,0.5]
BIM1	BLV1	BIM	BLV	BIM1BLV1	Glycerol	-10	-1	0.0838921	-0.458054	-1	0.0838921	0.176492	(0.05,0.5]
BIM1	BQQ1	BIM	BQQ	BIM1BQQ1	Glu+Sorbitol	-10	0.006083	0.0432009	0.0246419	0.006083	0.0432009	0.171228	(0.05,0.5]
BIM1	BQQ1	BIM	BQQ	BIM1BQQ1	Glucose	-10	0.0466863	0.0291802	0.0379332	0.0291802	0.0466863	0.171228	(0.05,0.5]
BIM1	BQQ1	BIM	BQQ	BIM1BQQ1	Glycerol	-10	-1	0.0824425	-0.458779	-1	0.0824425	0.171228	(0.05,0.5]
BIM1	BMA1	BIM	BMA	BIM1BMA1	Glu+Sorbitol	-0.0136297	0.006083	0.0267219	0.0164025	0.006083	0.0267219	1.56508	(1, 1.5]
BIM1	BMA1	BIM	BMA	BIM1BMA1	Glucose	-10	0.0466863	0.0277247	0.0372055	0.0277247	0.0466863	1.56508	(1, 1.5]
BIM1	BMA1	BIM	BMA	BIM1BMA1	Glycerol	-10	-1	0.0885346	-0.455733	-1	0.0885346	1.56508	(1, 1.5]
BIM1	BQR1	BIM	BQR	BIM1BQR1	Glu+Sorbitol	-0.262347	0.006083	0.0524282	0.0292556	0.006083	0.0524282	0.172719	(0.05,0.5]
BIM1	BQR1	BIM	BQR	BIM1BQR1	Glucose	-10	0.0466863	-0.0545715	-0.00394262	-0.0545715	0.0466863	0.172719	(0.05,0.5]
BIM1	BQR1	BIM	BQR	BIM1BQR1	Glycerol	-10	-1	0.0588489	-0.470576	-1	0.0588489	0.172719	(0.05,0.5]
BIM1	CAD1	BIM	CAD	BIM1CAD1	Glu+Sorbitol	-10	0.006083	0.0934632	0.0497731	0.006083	0.0934632	0.327029	(0.05,0.5]
BIM1	CAD1	BIM	CAD	BIM1CAD1	Glucose	-10	0.0466863	-0.0194773	0.0136045	-0.0194773	0.0466863	0.327029	(0.05,0.5]
BIM1	CAD1	BIM	CAD	BIM1CAD1	Glycerol	-10	-1	-10	-5.5	-10	-1	0.327029	(0.05,0.5]
BIM1	BSB1	BIM	BSB	BIM1BSB1	Glu+Sorbitol	-10	0.006083	-10	-4.99696	-10	0.006083	0.169314	(0.05,0.5]
BIM1	BSB1	BIM	BSB	BIM1BSB1	Glucose	-10	0.0466863	-10	0.0466863	0.0466863	0.0466863	0.169314	(0.05,0.5]
BIM1	BSB1	BIM	BSB	BIM1BSB1	Glycerol	-10	-1	-10	-1	-1	-1	0.169314	(0.05,0.5]
BIM1	BTH1	BIM	BTH	BIM1BTH1	Glu+Sorbitol	-1	0.006083	0.0555657	0.0308244	0.006083	0.0555657	0.173138	(0.05,0.5]
BIM1	BTH1	BIM	BTH	BIM1BTH1	Glucose	-10	0.0466863	-0.01391	0.0163881	-0.01391	0.0466863	0.173138	(0.05,0.5]
BIM1	BTH1	BIM	BTH	BIM1BTH1	Glycerol	-10	-1	-1	-1	-1	-1	0.173138	(0.05,0.5]
BIM1	AHP1	BIM	AHP	BIM1AHP1	Glu+Sorbitol	-10	0.006083	-1	-0.496959	-1	0.006083	0.335835	(0.05,0.5]
BIM1	AHP1	BIM	AHP	BIM1AHP1	Glucose	-10	0.0466863	-1	-0.476657	-1	0.0466863	0.335835	(0.05,0.5]
BIM1	AHP1	BIM	AHP	BIM1AHP1	Glycerol	-10	-1	0.0888156	-0.455592	-1	0.0888156	0.335835	(0.05,0.5]
BIM1	CQD1	BIM	CQD	BIM1CQD1	Glu+Sorbitol	-10	0.006083	0.0454048	0.0257439	0.006083	0.0454048	0.771835	(0.5,1]
BIM1	CQD1	BIM	CQD	BIM1CQD1	Glucose	-0.0628114	0.0466863	0.0106465	0.0286664	0.0106465	0.0466863	0.771835	(0.5,1]
BIM1	CQD1	BIM	CQD	BIM1CQD1	Glycerol	-10	-1	-10	-5.5	-10	-1	0.771835	(0.5,1]
BIM1	APV1	BIM	APV	BIM1APV1	Glu+Sorbitol	-1	0.006083	0.0394829	0.0227829	0.006083	0.0394829	0.173618	(0.05,0.5]
BIM1	APV1	BIM	APV	BIM1APV1	Glucose	-10	0.0466863	-0.0613302	-0.00732194	-0.0613302	0.0466863	0.173618	(0.05,0.5]
BIM1	APV1	BIM	APV	BIM1APV1	Glycerol	-10	-1	0.176787	-0.411606	-1	0.176787	0.173618	(0.05,0.5]
BIM1	AST1	BIM	AST	BIM1AST1	Glu+Sorbitol	-10	0.006083	-1	-0.496959	-1	0.006083	0.310371	(0.05,0.5]
BIM1	AST1	BIM	AST	BIM1AST1	Glucose	-0.0137379	0.0466863	0.0143308	0.0305085	0.0143308	0.0466863	0.310371	(0.05,0.5]
BIM1	AST1	BIM	AST	BIM1AST1	Glycerol	-10	-1	-1	-1	-1	-1	0.310371	(0.05,0.5]
BIM1	CCV1	BIM	CCV	BIM1CCV1	Glu+Sorbitol	-0.122481	0.006083	0.107101	0.0565919	0.006083	0.107101	1.45847	(1, 1.5]
BIM1	CCV1	BIM	CCV	BIM1CCV1	Glucose	-0.04075	0.0466863	0.044604	0.0456451	0.044604	0.0466863	1.45847	(1, 1.5]
BIM1	CCV1	BIM	CCV	BIM1CCV1	Glycerol	-10	-1	-1	-1	-1	-1	1.45847	(1, 1.5]
BIM1	YAR1	BIM	YAR	BIM1YAR1	Glu+Sorbitol	-1	0.006083	-1	-0.496959	-1	0.006083	0.810393	(0.5,1]
BIM1	YAR1	BIM	YAR	BIM1YAR1	Glucose	-0.0637585	0.0466863	-0.0705407	-0.0119272	-0.0705407	0.0466863	0.810393	(0.5,1]
BIM1	YAR1	BIM	YAR	BIM1YAR1	Glycerol	-10	-1	-1	-1	-1	-1	0.810393	(0.5,1]
BIM1	YBU1	BIM	YBU	BIM1YBU1	Glu+Sorbitol	-10	0.006083	-1	-0.496959	-1	0.006083	1.07819	(0.5,1]
BIM1	YBU1	BIM	YBU	BIM1YBU1	Glucose	-10	0.0466863	-10	-4.97666	-10	0.0466863	1.07819	(0.5,1]
BIM1	YBU1	BIM	YBU	BIM1YBU1	Glycerol	-10	-1	-1	-1	-1	-1	1.07819	(0.5,1]
BKE1	AKB1	BKE	AKB	BKE1AKB1	Glu+Sorbitol	0.000514185	-1	0.139707	-0.430147	-1	0.139707	1.53887	(1, 1.5]
BKE1	AKB1	BKE	AKB	BKE1AKB1	Glucose	-10	-0.0547633	-0.0154866	-0.035125	-0.0547633	-0.0154866	1.53887	(1, 1.5]
BKE1	AKB1	BKE	AKB	BKE1AKB1	Glycerol	0.0684751	0.165242	-1	-0.417379	-1	0.165242	1.53887	(1, 1.5]
BKE1	AKP1	BKE	AKP	BKE1AKP1	Glu+Sorbitol	-0.0393702	-1	0.0982963	-0.450852	-1	0.0982963	0.199112	(0.05,0.5]
BKE1	AKP1	BKE	AKP	BKE1AKP1	Glucose	0.00723984	-0.0547633	-0.0557565	-0.0552599	-0.0557565	-0.0547633	0.199112	(0.05,0.5]
BKE1	AKP1	BKE	AKP	BKE1AKP1	Glycerol	0.0310727	0.165242	-0.109008	0.0281166	-0.109008	0.165242	0.199112	(0.05,0.5]
BKE1	ALG1	BKE	ALG	BKE1ALG1	Glu+Sorbitol	-10	-1	0.0868454	-0.456577	-1	0.0868454	0.791927	(0.5,1]
BKE1	ALG1	BKE	ALG	BKE1ALG1	Glucose	-10	-0.0547633	-0.141619	-0.0981909	-0.141619	-0.0547633	0.791927	(0.5,1]
BKE1	ALG1	BKE	ALG	BKE1ALG1	Glycerol	-10	0.165242	-0.0464457	0.059398	-0.0464457	0.165242	0.791927	(0.5,1]
BKE1	ANG1	BKE	ANG	BKE1ANG1	Glu+Sorbitol	-10	-1	0.0628167	-0.468592	-1	0.0628167	1.32825	(1, 1.5]
BKE1	ANG1	BKE	ANG	BKE1ANG1	Glucose	-10	-0.0547633	0.0663533	0.00579498	-0.0547633	0.0663533	1.32825	(1, 1.5]
BKE1	ANG1	BKE	ANG	BKE1ANG1	Glycerol	-10	0.165242	-1	-0.417379	-1	0.165242	1.32825	(1, 1.5]
BKE1	AIM1	BKE	AIM	BKE1AIM1	Glu+Sorbitol	-10	-1	-1	-1	-1	-1	0.264181	(0.05,0.5]
BKE1	AIM1	BKE	AIM	BKE1AIM1	Glucose	-10	-0.0547633	-10	-5.02738	-10	-0.0547633	0.264181	(0.05,0.5]
BKE1	AIM1	BKE	AIM	BKE1AIM1	Glycerol	-10	0.165242	-10	-4.91738	-10	0.165242	0.264181	(0.05,0.5]
BKE1	AKV1	BKE	AKV	BKE1AKV1	Glu+Sorbitol	-0.0159854	-1	0.0943177	-0.452841	-1	0.0943177	0.198914	(0.05,0.5]
BKE1	AKV1	BKE	AKV	BKE1AKV1	Glucose	0.0281561	-0.0547633	-0.033945	-0.0443542	-0.0547633	-0.033945	0.198914	(0.05,0.5]
BKE1	AKV1	BKE	AKV	BKE1AKV1	Glycerol	0.0341091	0.165242	-0.0735332	0.0458542	-0.0735332	0.165242	0.198914	(0.05,0.5]
BKE1	BBI1	BKE	BBI	BKE1BBI1	Glu+Sorbitol	-10	-1	0.242166	-0.378917	-1	0.242166	0.204804	(0.05,0.5]
BKE1	BBI1	BKE	BBI	BKE1BBI1	Glucose	-10	-0.0547633	0.0118567	-0.0214533	-0.0547633	0.0118567	0.204804	(0.05,0.5]
BKE1	BBI1	BKE	BBI	BKE1BBI1	Glycerol	-10	0.165242	-0.0628554	0.0511931	-0.0628554	0.165242	0.204804	(0.05,0.5]
BKE1	BAK1	BKE	BAK	BKE1BAK1	Glu+Sorbitol	0.0201747	-1	0.0545167	-0.472742	-1	0.0545167	1.47122	(1, 1.5]
BKE1	BAK1	BKE	BAK	BKE1BAK1	Glucose	0.104759	-0.0547633	0.0639478	0.00459225	-0.0547633	0.0639478	1.47122	(1, 1.5]
BKE1	BAK1	BKE	BAK	BKE1BAK1	Glycerol	0.154617	0.165242	-0.00177197	0.0817348	-0.00177197	0.165242	1.47122	(1, 1.5]
BKE1	BEH1	BKE	BEH	BKE1BEH1	Glu+Sorbitol	-10	-1	0.114205	-0.442898	-1	0.114205	1.46626	(1, 1.5]
BKE1	BEH1	BKE	BEH	BKE1BEH1	Glucose	-10	-0.0547633	-0.0314472	-0.0431053	-0.0547633	-0.0314472	1.46626	(1, 1.5]
BKE1	BEH1	BKE	BEH	BKE1BEH1	Glycerol	-10	0.165242	-1	-0.417379	-1	0.165242	1.46626	(1, 1.5]
BKE1	BLA1	BKE	BLA	BKE1BLA1	Glu+Sorbitol	-10	-1	-10	-5.5	-10	-1	0.187282	(0.05,0.5]
BKE1	BLA1	BKE	BLA	BKE1BLA1	Glucose	-10	-0.0547633	-10	-5.02738	-10	-0.0547633	0.187282	(0.05,0.5]
BKE1	BLA1	BKE	BLA	BKE1BLA1	Glycerol	-0.0146085	0.165242	-10	-4.91738	-10	0.165242	0.187282	(0.05,0.5]
BKE1	BHM1	BKE	BHM	BKE1BHM1	Glu+Sorbitol	-10	-1	-1	-1	-1	-1	0.277323	(0.05,0.5]
BKE1	BHM1	BKE	BHM	BKE1BHM1	Glucose	-10	-0.0547633	-10	-5.02738	-10	-0.0547633	0.277323	(0.05,0.5]
BKE1	BHM1	BKE	BHM	BKE1BHM1	Glycerol	-10	0.165242	-1	-0.417379	-1	0.165242	0.277323	(0.05,0.5]
BKE1	BHN1	BKE	BHN	BKE1BHN1	Glu+Sorbitol	-0.062694	-1	0.00750642	-0.496247	-1	0.00750642	0.202245	(0.05,0.5]
BKE1	BHN1	BKE	BHN	BKE1BHN1	Glucose	-0.00619974	-0.0547633	-1	-0.527382	-1	-0.0547633	0.202245	(0.05,0.5]
BKE1	BHN1	BKE	BHN	BKE1BHN1	Glycerol	0.0288973	0.165242	-1	-0.417379	-1	0.165242	0.202245	(0.05,0.5]
BKE1	BHB1	BKE	BHB	BKE1BHB1	Glu+Sorbitol	-0.106728	-1	-1	-1	-1	-1	0.284438	(0.05,0.5]
BKE1	BHB1	BKE	BHB	BKE1BHB1	Glucose	-0.120421	-0.0547633	-10	-5.02738	-10	-0.0547633	0.284438	(0.05,0.5]
BKE1	BHB1	BKE	BHB	BKE1BHB1	Glycerol	0.0302819	0.165242	-10	-4.91738	-10	0.165242	0.284438	(0.05,0.5]
BKE1	BLE1	BKE	BLE	BKE1BLE1	Glu+Sorbitol	-0.0929095	-1	-1	-1	-1	-1	0.190105	(0.05,0.5]
BKE1	BLE1	BKE	BLE	BKE1BLE1	Glucose	-10	-0.0547633	-0.0748489	-0.0648061	-0.0748489	-0.0547633	0.190105	(0.05,0.5]
BKE1	BLE1	BKE	BLE	BKE1BLE1	Glycerol	-0.0496414	0.165242	-0.044381	0.0604303	-0.044381	0.165242	0.190105	(0.05,0.5]
BKE1	BHF1	BKE	BHF	BKE1BHF1	Glu+Sorbitol	0.00942906	-1	0.0591106	-0.470445	-1	0.0591106	0.187631	(0.05,0.5]
BKE1	BHF1	BKE	BHF	BKE1BHF1	Glucose	-0.00191751	-0.0547633	0.0612509	0.00324377	-0.0547633	0.0612509	0.187631	(0.05,0.5]
BKE1	BHF1	BKE	BHF	BKE1BHF1	Glycerol	0.0237081	0.165242	0.0945635	0.129903	0.0945635	0.165242	0.187631	(0.05,0.5]
BKE1	BKR1	BKE	BKR	BKE1BKR1	Glu+Sorbitol	-0.0947855	-1	-1	-1	-1	-1	0.196206	(0.05,0.5]
BKE1	BKR1	BKE	BKR	BKE1BKR1	Glucose	-10	-0.0547633	-0.013402	-0.0340827	-0.0547633	-0.013402	0.196206	(0.05,0.5]
BKE1	BKR1	BKE	BKR	BKE1BKR1	Glycerol	0.0308373	0.165242	-1	-0.417379	-1	0.165242	0.196206	(0.05,0.5]
BKE1	BLL1	BKE	BLL	BKE1BLL1	Glu+Sorbitol	-1	-1	-1	-1	-1	-1	0.191065	(0.05,0.5]
BKE1	BLL1	BKE	BLL	BKE1BLL1	Glucose	-10	-0.0547633	-1	-0.527382	-1	-0.0547633	0.191065	(0.05,0.5]
BKE1	BLL1	BKE	BLL	BKE1BLL1	Glycerol	0.0282397	0.165242	0.120353	0.142797	0.120353	0.165242	0.191065	(0.05,0.5]
BKE1	BNI1	BKE	BNI	BKE1BNI1	Glu+Sorbitol	-10	-1	-10	-1	-1	-1	0.197776	(0.05,0.5]
BKE1	BNI1	BKE	BNI	BKE1BNI1	Glucose	-10	-0.0547633	-10	-0.0547633	-0.0547633	-0.0547633	0.197776	(0.05,0.5]
BKE1	BNI1	BKE	BNI	BKE1BNI1	Glycerol	0.0275004	0.165242	-10	0.165242	0.165242	0.165242	0.197776	(0.05,0.5]
BKE1	BQG1	BKE	BQG	BKE1BQG1	Glu+Sorbitol	0.00189428	-1	0.133013	-0.433494	-1	0.133013	0.194693	(0.05,0.5]
BKE1	BQG1	BKE	BQG	BKE1BQG1	Glucose	-10	-0.0547633	-0.0571925	-0.0559779	-0.0571925	-0.0547633	0.194693	(0.05,0.5]
BKE1	BQG1	BKE	BQG	BKE1BQG1	Glycerol	0.0205233	0.165242	0.0537228	0.109482	0.0537228	0.165242	0.194693	(0.05,0.5]
BKE1	BNK1	BKE	BNK	BKE1BNK1	Glu+Sorbitol	-0.0744858	-1	-1	-1	-1	-1	0.190241	(0.05,0.5]
BKE1	BNK1	BKE	BNK	BKE1BNK1	Glucose	-0.0249402	-0.0547633	-0.0796816	-0.0672225	-0.0796816	-0.0547633	0.190241	(0.05,0.5]
BKE1	BNK1	BKE	BNK	BKE1BNK1	Glycerol	0.0408534	0.165242	0.115878	0.14056	0.115878	0.165242	0.190241	(0.05,0.5]
BKE1	BPQ1	BKE	BPQ	BKE1BPQ1	Glu+Sorbitol	0.095508	-1	0.196057	-0.401972	-1	0.196057	0.219488	(0.05,0.5]
BKE1	BPQ1	BKE	BPQ	BKE1BPQ1	Glucose	0.0340963	-0.0547633	0.00714221	-0.0238106	-0.0547633	0.00714221	0.219488	(0.05,0.5]
BKE1	BPQ1	BKE	BPQ	BKE1BPQ1	Glycerol	0.0113344	0.165242	0.0632255	0.114234	0.0632255	0.165242	0.219488	(0.05,0.5]
BKE1	BQH1	BKE	BQH	BKE1BQH1	Glu+Sorbitol	-10	-1	0.00347705	-0.498261	-1	0.00347705	0.187566	(0.05,0.5]
BKE1	BQH1	BKE	BQH	BKE1BQH1	Glucose	-10	-0.0547633	0.0201877	-0.0172878	-0.0547633	0.0201877	0.187566	(0.05,0.5]
BKE1	BQH1	BKE	BQH	BKE1BQH1	Glycerol	0.0183953	0.165242	-1	-0.417379	-1	0.165242	0.187566	(0.05,0.5]
[truncated: 10,284 more rows]
